# Supplementary material
Source: PubMed Central journal article supplement (PMC9700506)

# Supplementary Dataset 2

Focal deletions (< 5Mb) in driver or putative driver genes

## ABI1 focal deletions

chr10 position

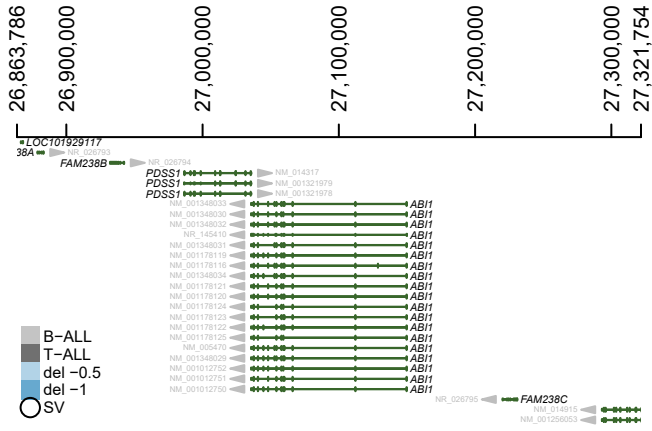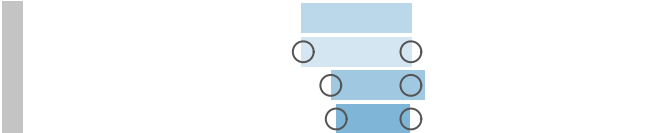

## ACVR2A focal deletions

chr 2 position

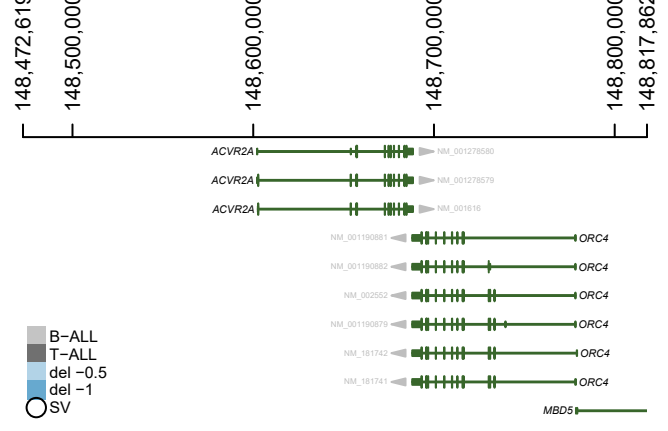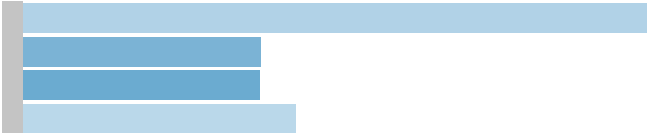

## ACTB focal deletions

chr 7 position

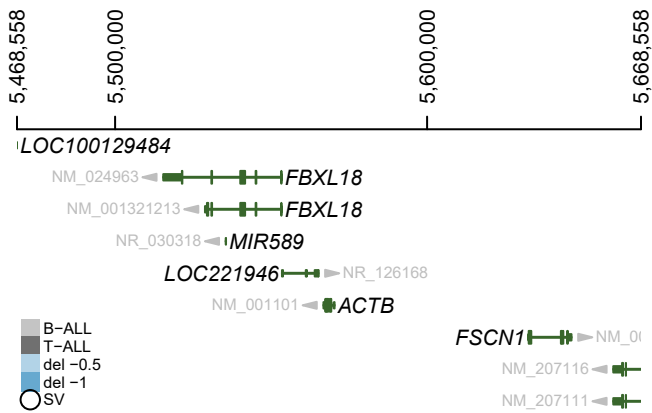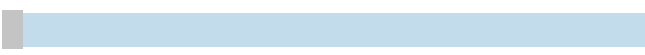

## ADD3 focal deletions

chr10 position

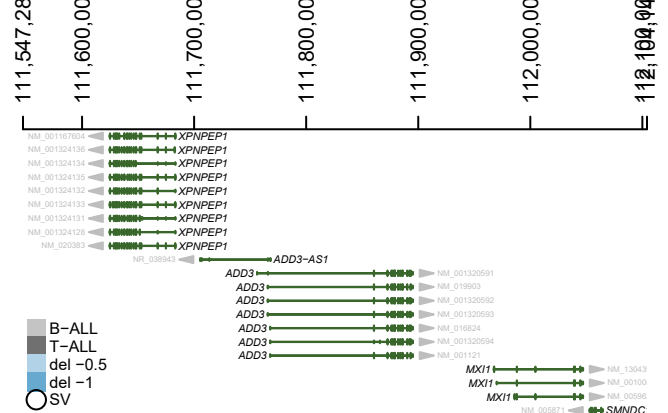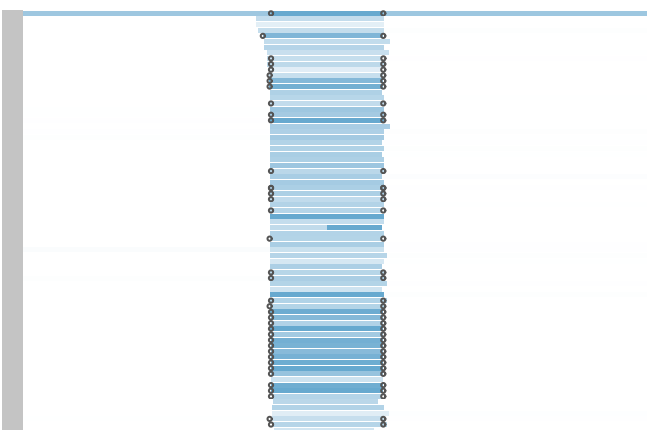

### AMN1 focal deletions

chr12 position

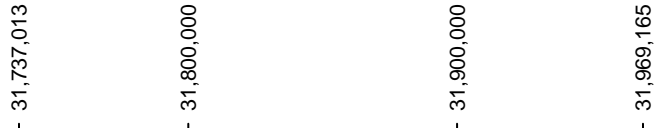

B-ALL  
T-ALL  
del -0.5  
del -1  
SV

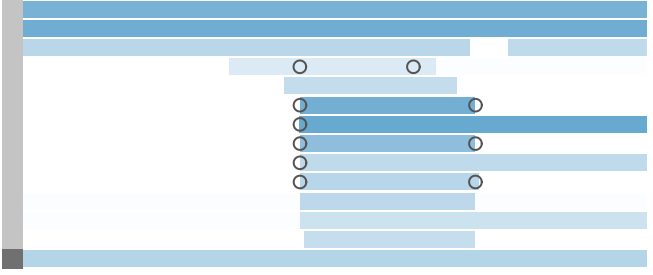

### ARID2 focal deletions

chr12 position

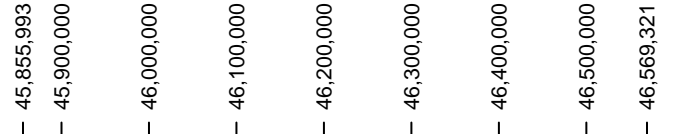

B-ALL  
T-ALL  
del -0.5  
del -1  
SV

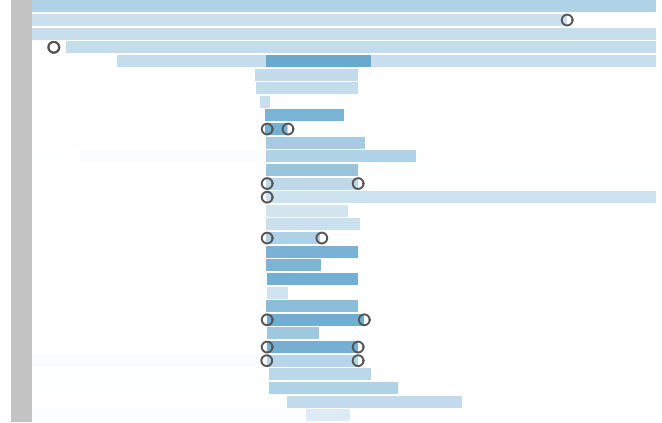

### ARID1A focal deletions

chr 1 position

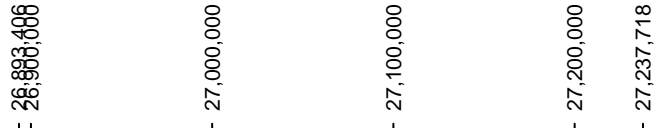

B-ALL  
T-ALL  
del -0.5  
del -1  
SV

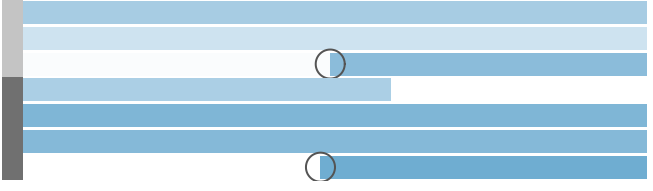

### ARID5B focal deletions

chr10 position

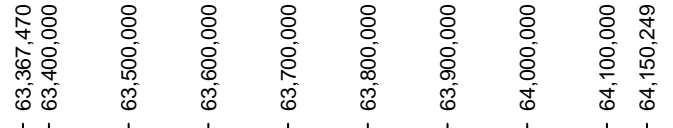

B-ALL  
T-ALL  
del -0.5  
del -1  
SV

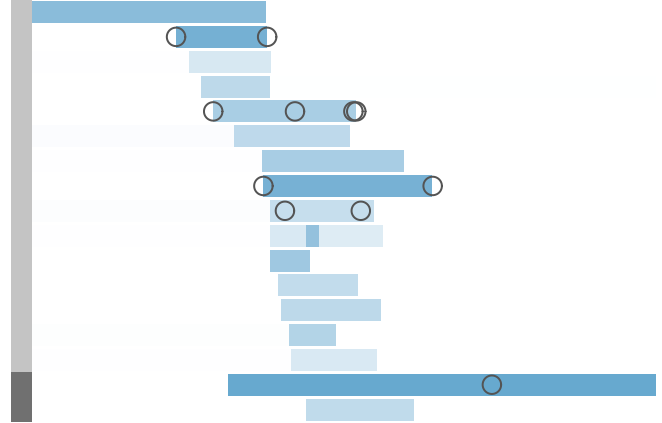

ZNF365H  
ZNF365H  
ZNF365H







### BCL11B focal deletions

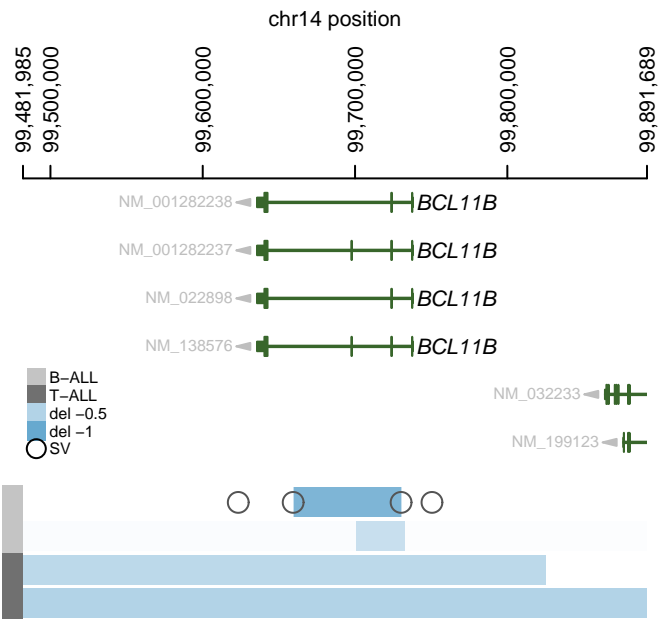

### BCORL1 focal deletions

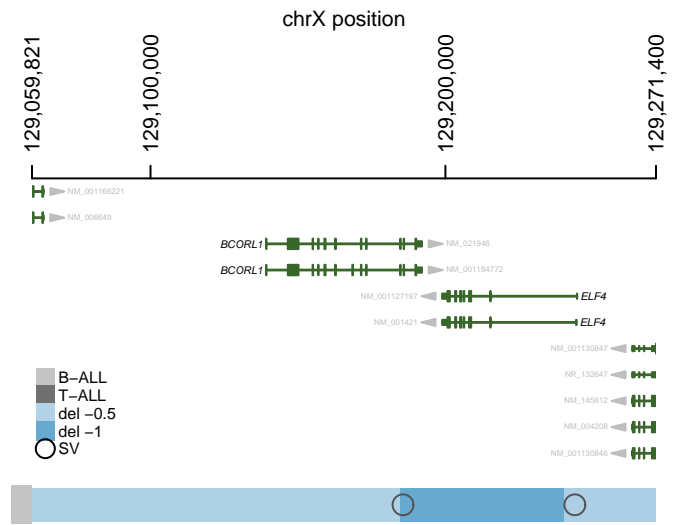

### BCOR focal deletions

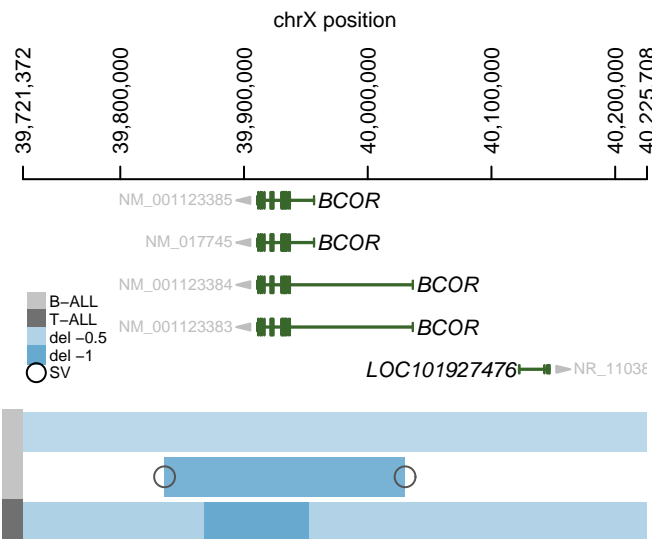

### BTG1 focal deletions

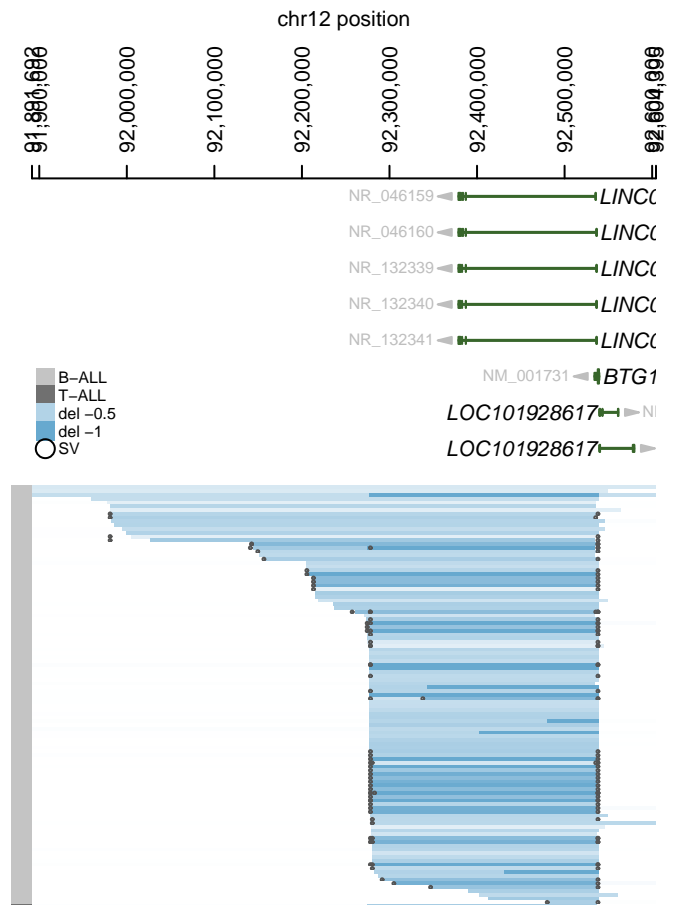



### CDKN1B focal deletions

chr12 position

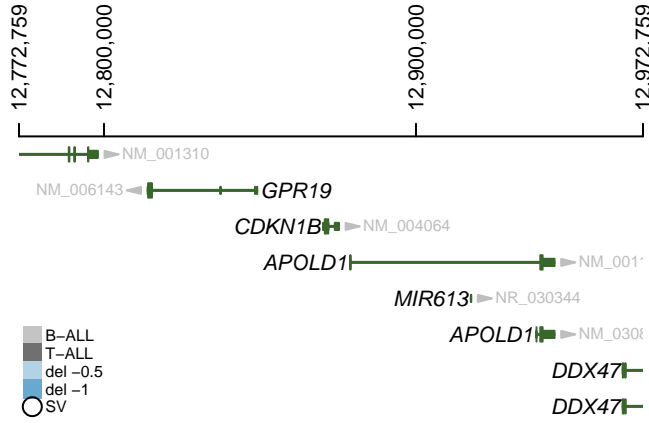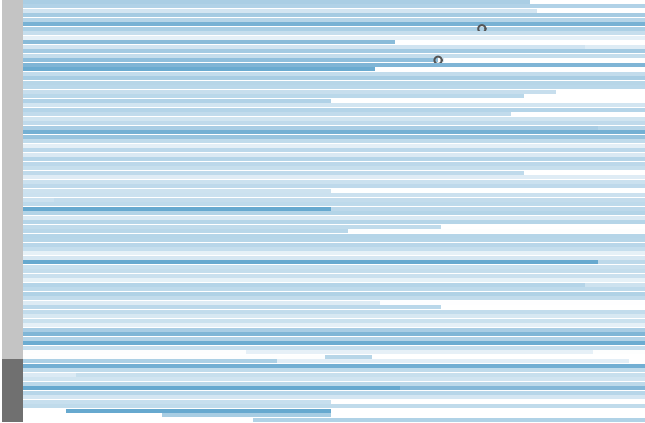

### CDKN2B focal deletions

chr 9 position

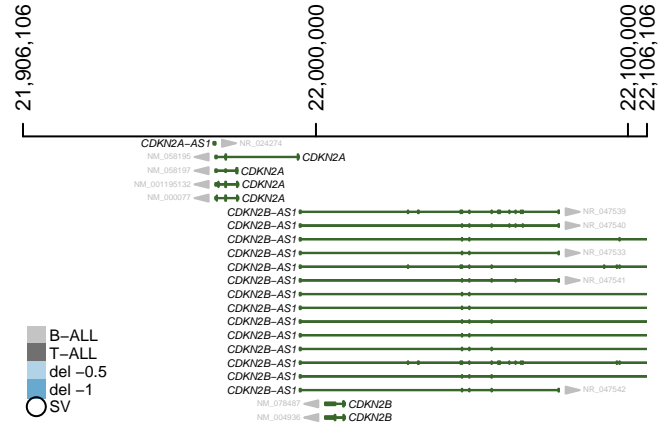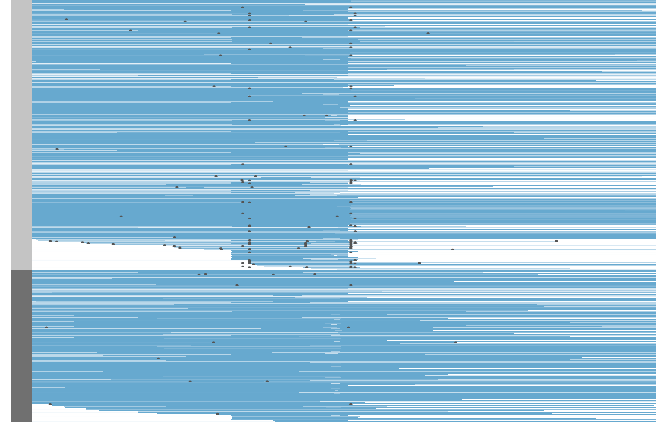

### CDKN2A focal deletions

chr 9 position

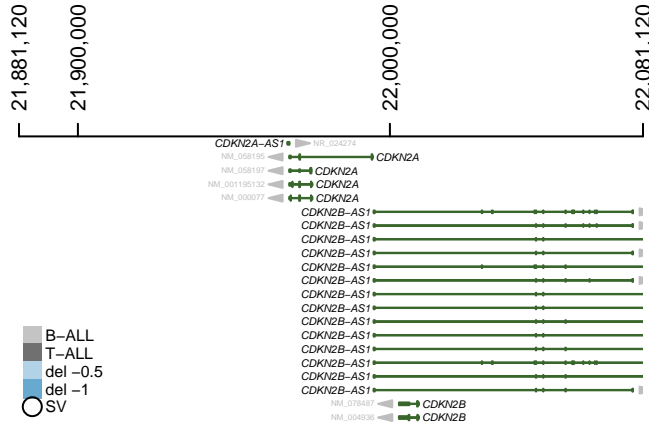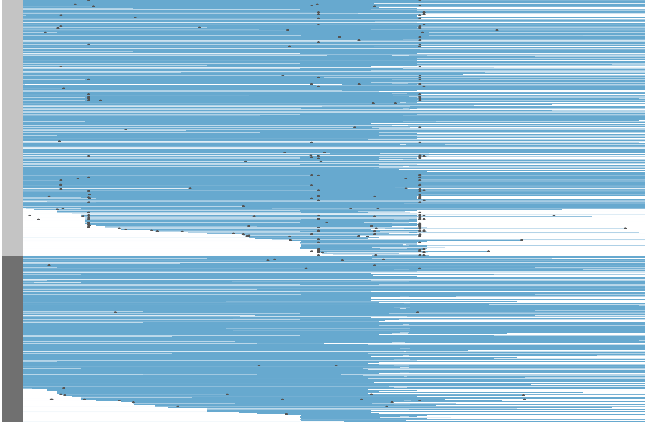

### CHD2 focal deletions

chr15 position

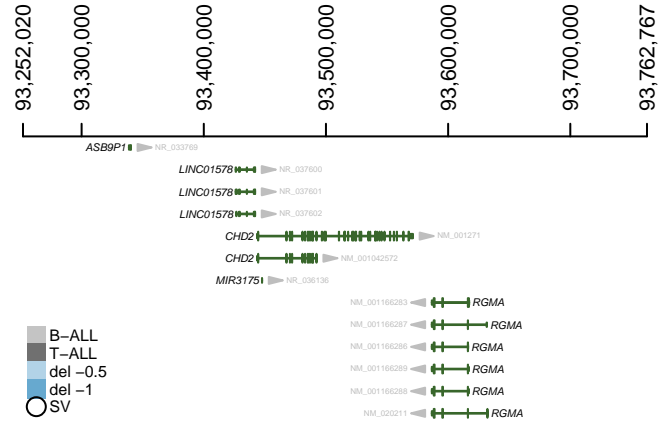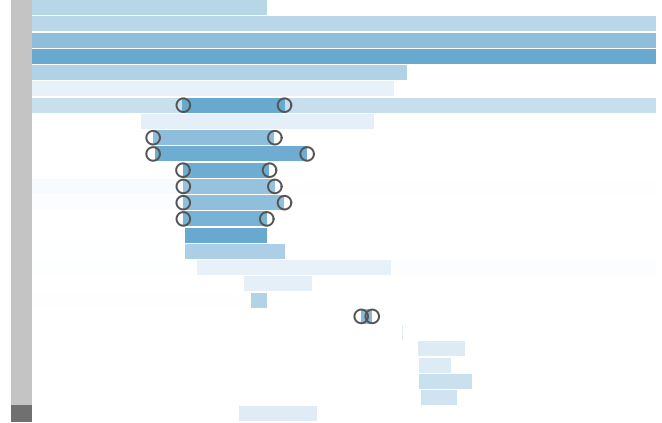



### CHD4 focal deletions

chr12 position

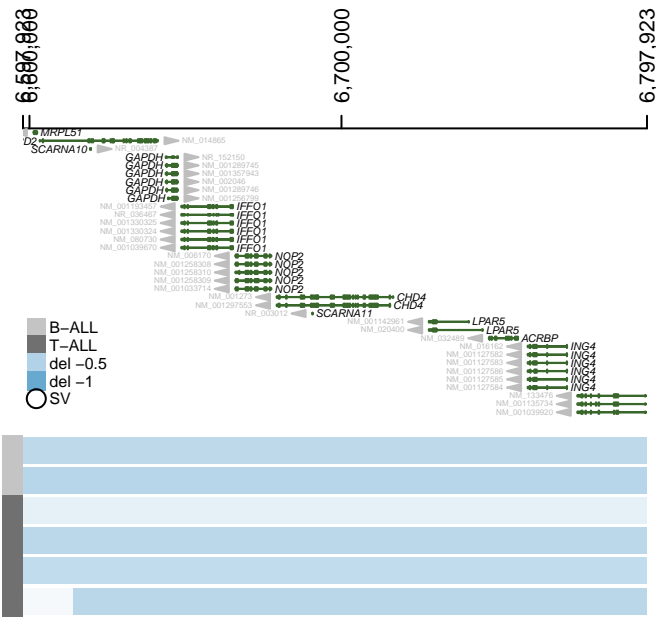

### CMTM1 focal deletions

chr16 position

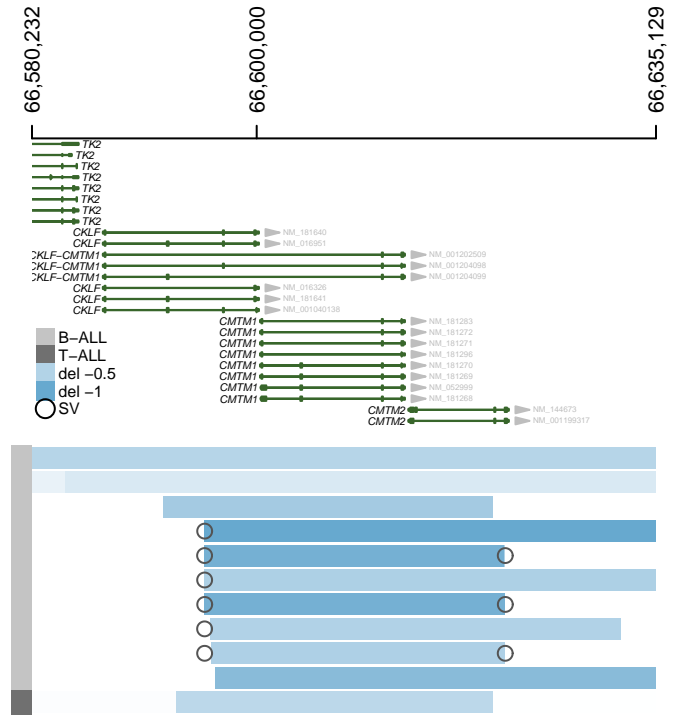

### CKLF focal deletions

chr16 position

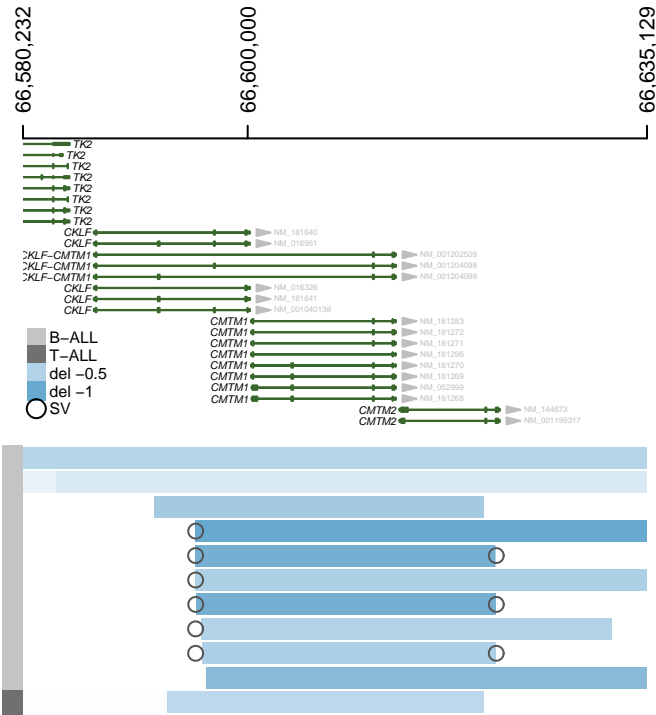

### CREBBP focal deletions

chr16 position

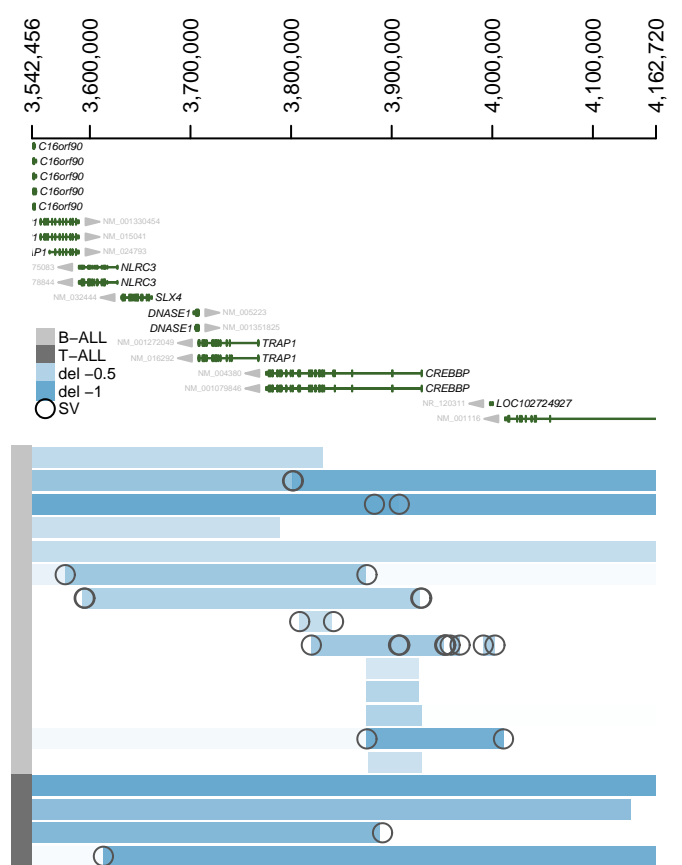

### CTCF focal deletions

chr16 position

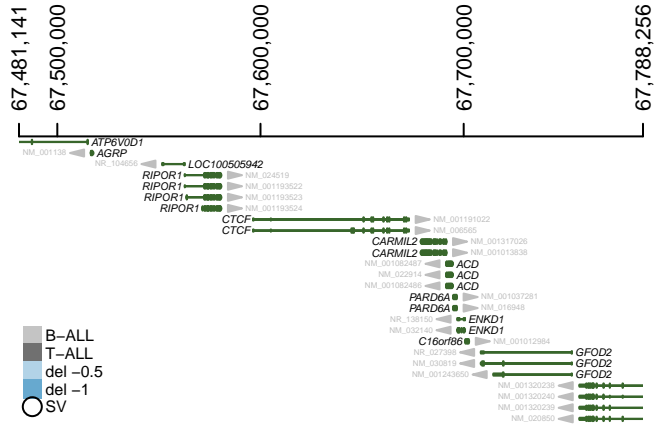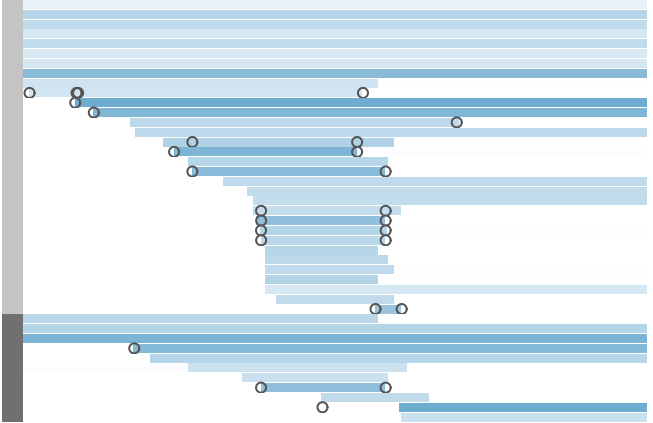

### DENND4A focal deletions

chr15 position

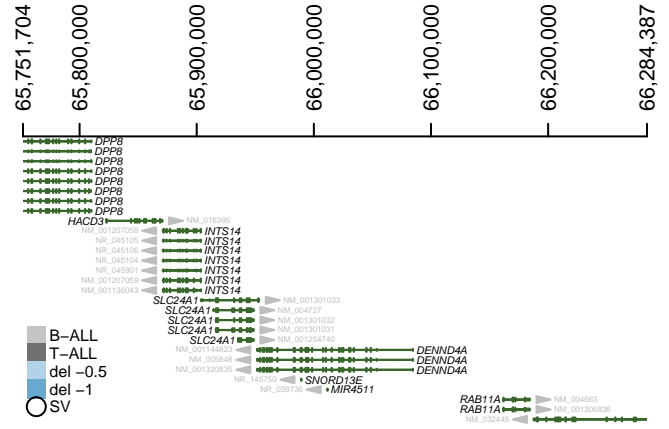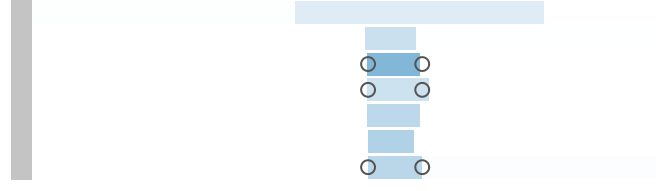

### DDX3X focal deletions

chrX position

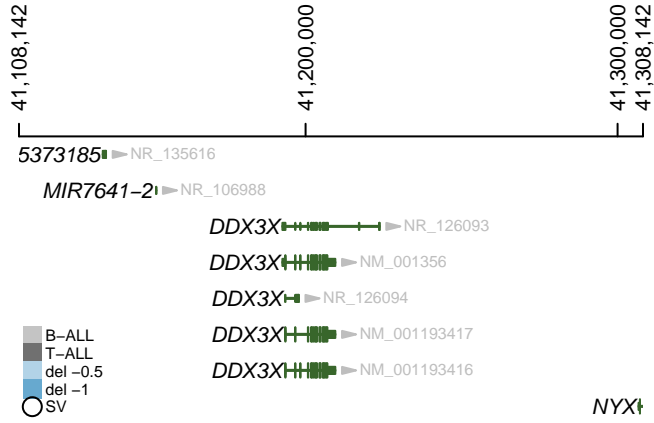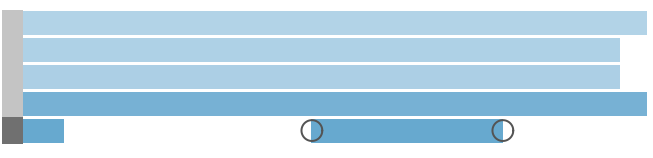

### DHX15 focal deletions

chr 4 position

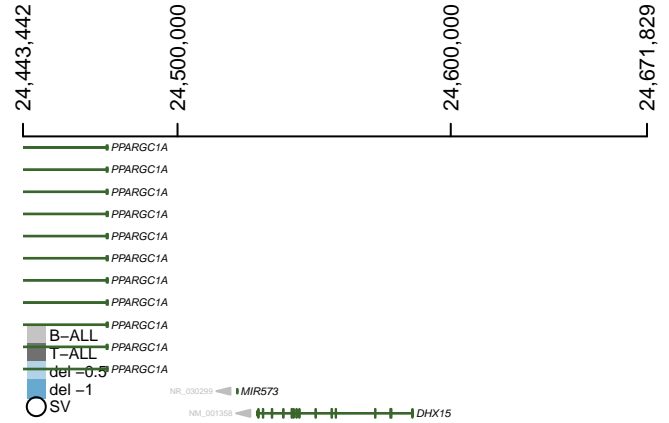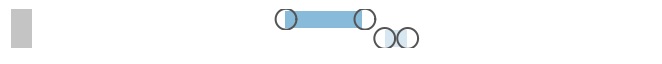





### ELF1 focal deletions

chr13 position

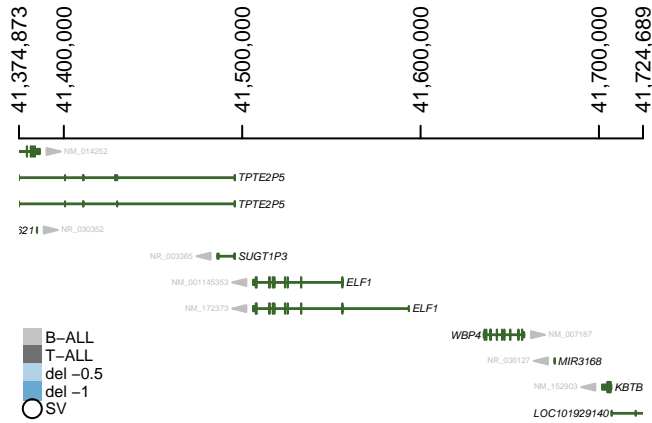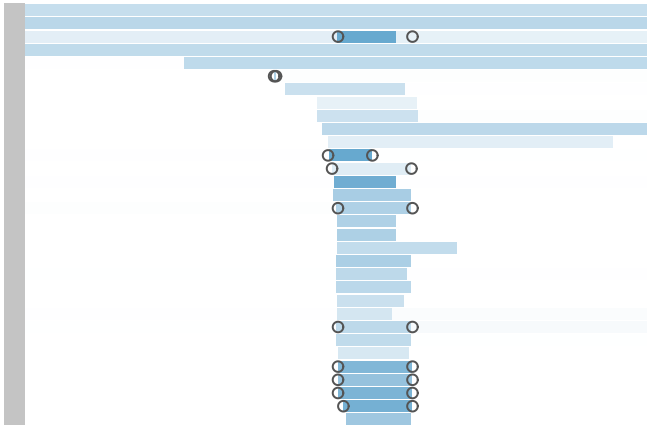

### ETV6 focal deletions

chr12 position

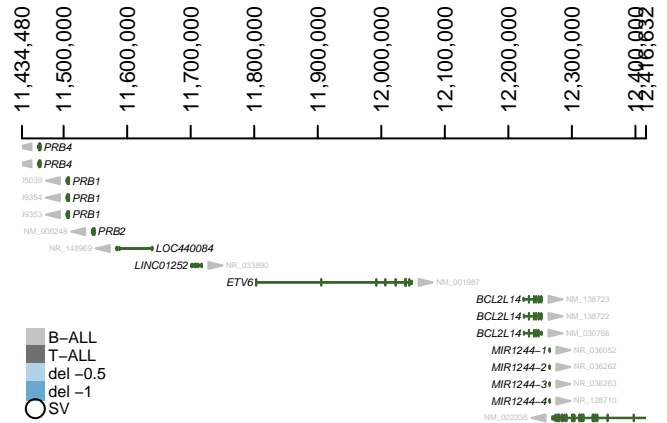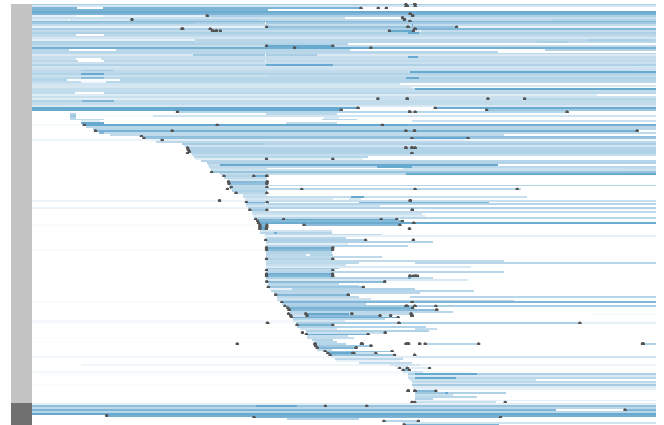

### ERG focal deletions

chr21 position

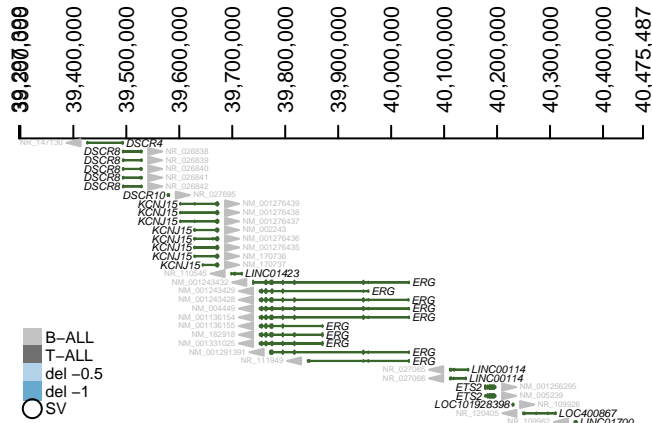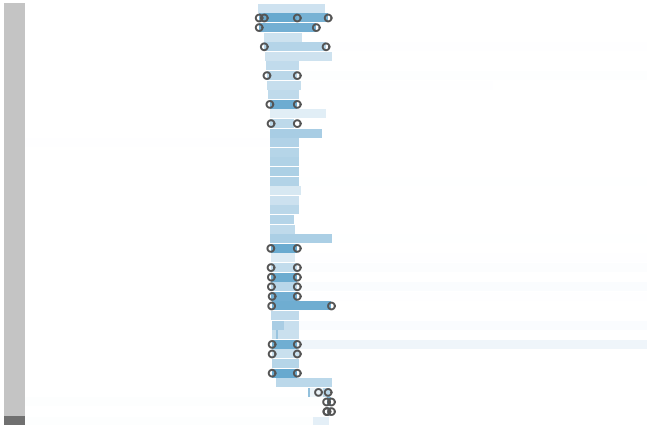

### EWSR1 focal deletions

chr22 position

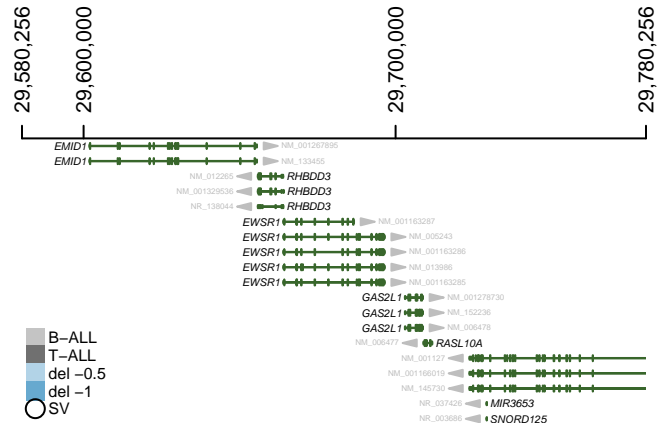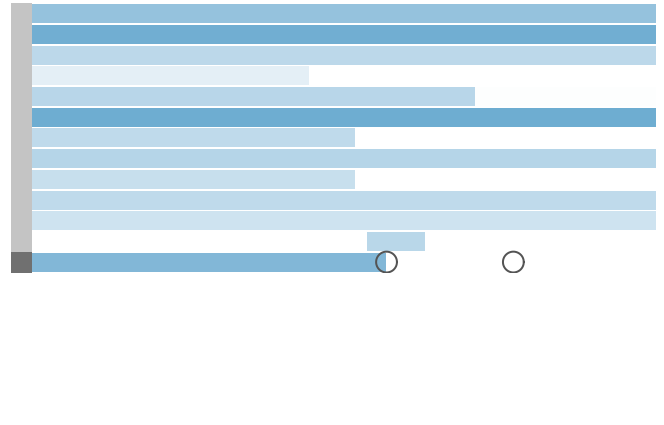

### EZH2 focal deletions

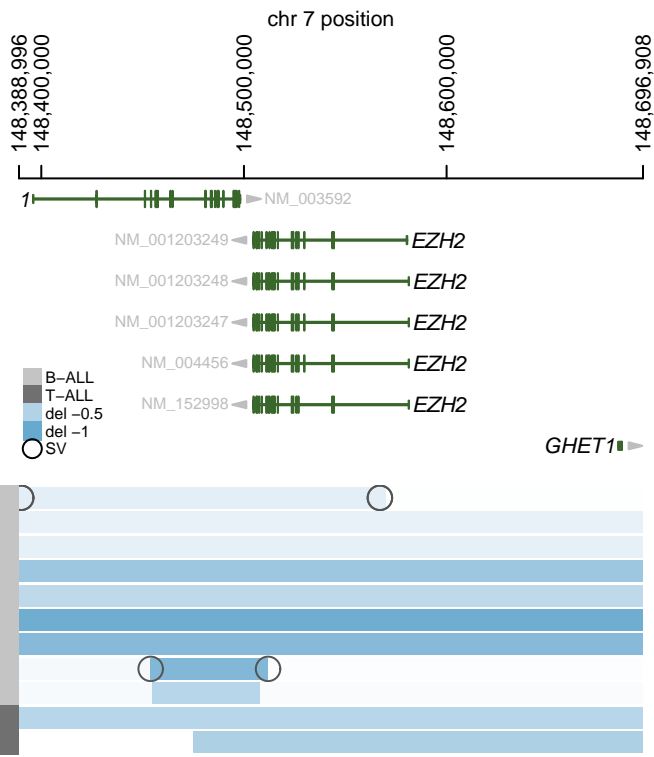

### FHIT focal deletions

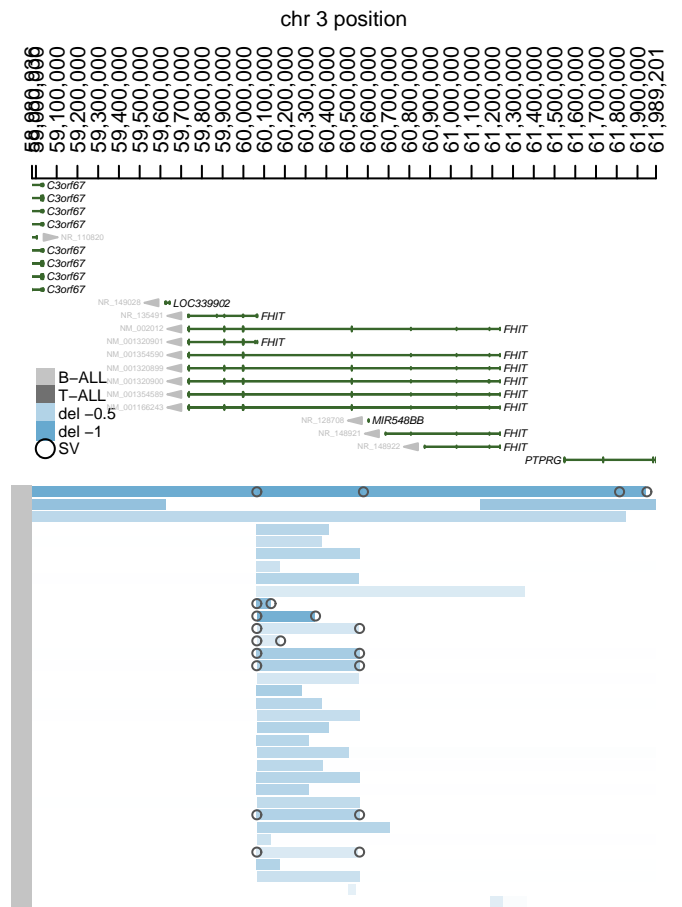

### FBXW7 focal deletions

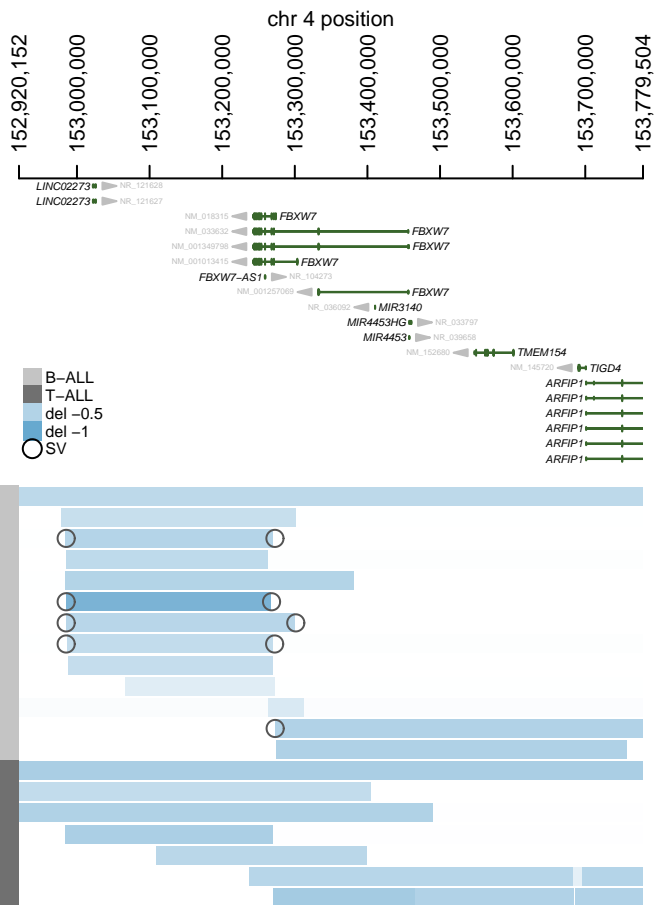

### FLNB focal deletions

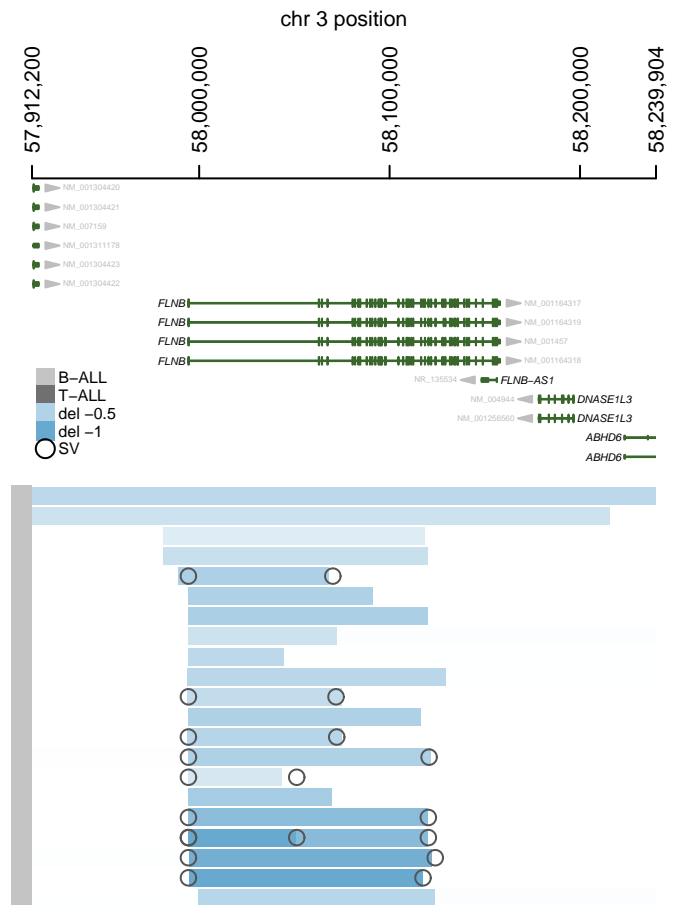

### GAB1 focal deletions

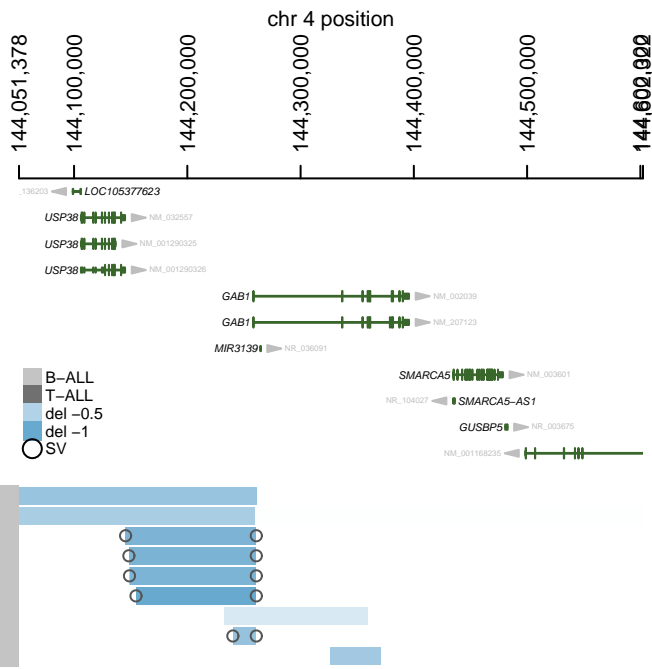

### GATA3 focal deletions

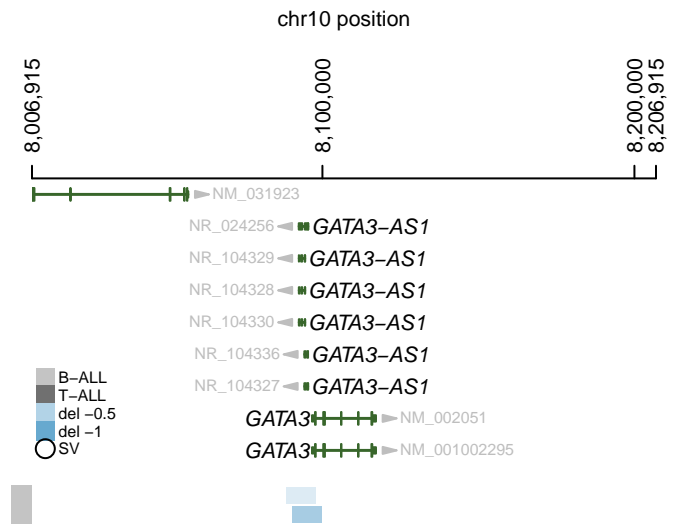

### GATA2 focal deletions

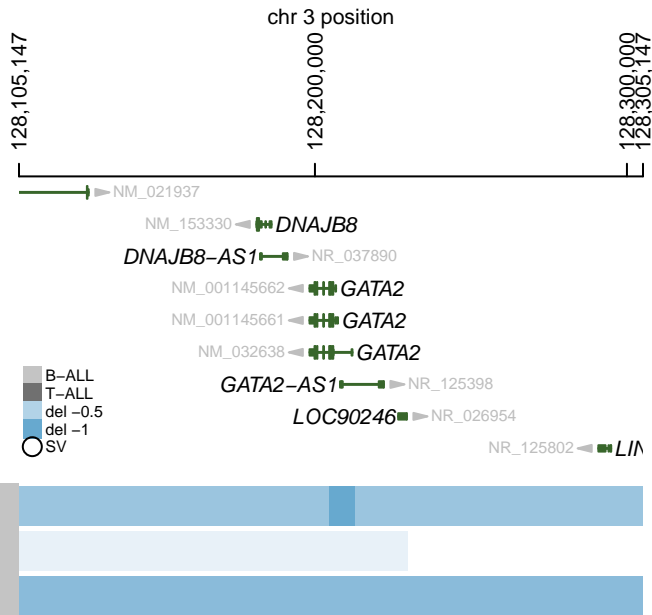

### GIGYF2 focal deletions

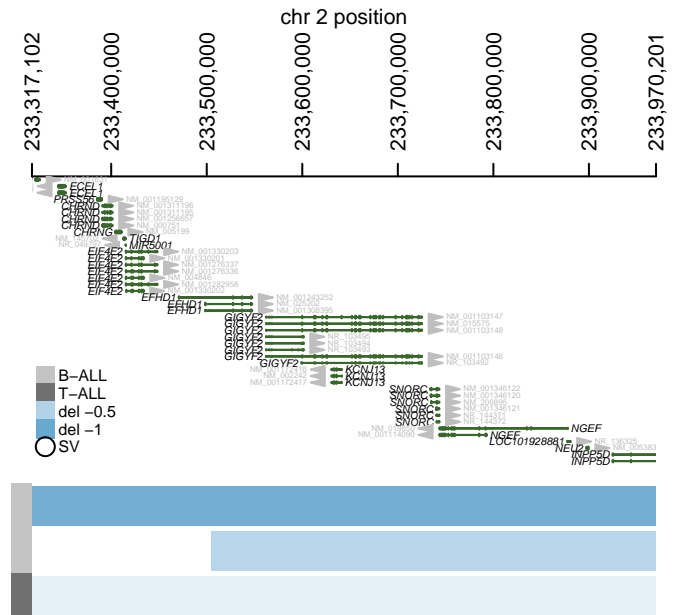

### GPN3 focal deletions

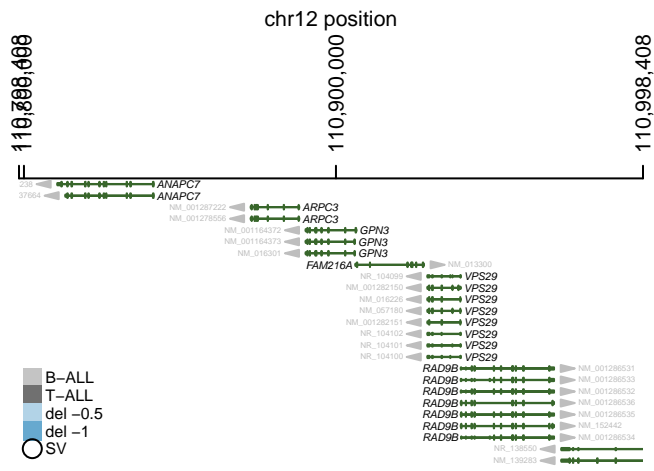

### HIST1H1A focal deletions

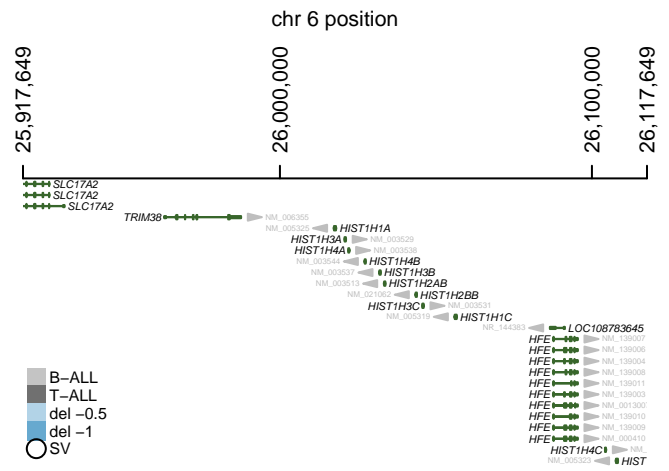

### HDAC7 focal deletions

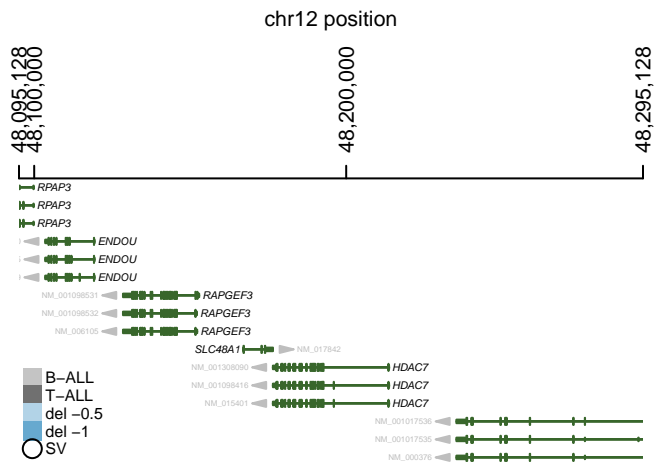

### HIST1H1B focal deletions

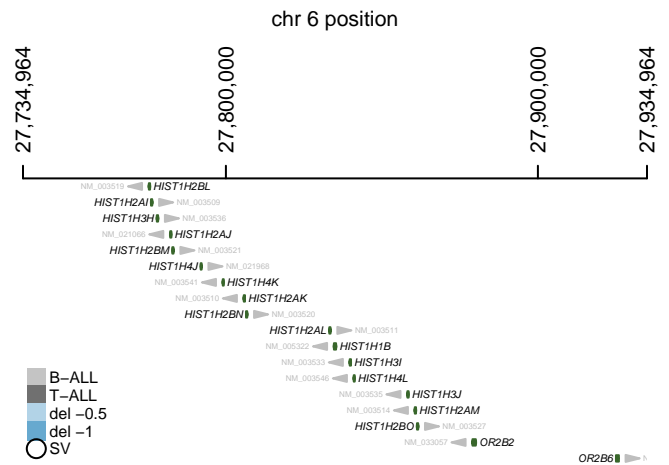



### HIST1H1C focal deletions

chr 6 position

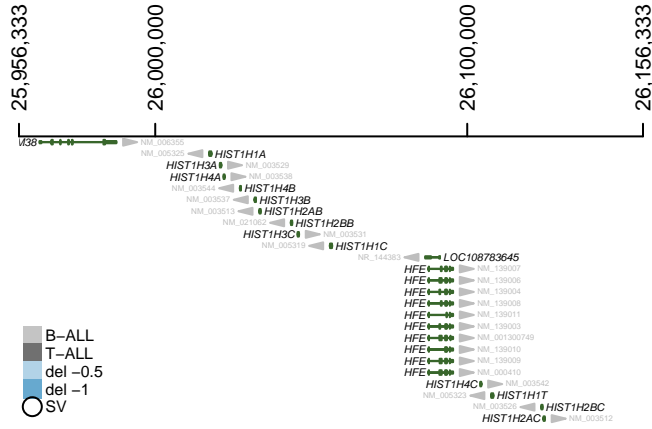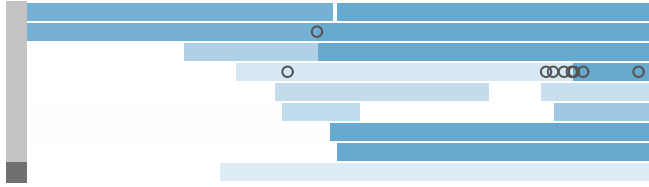

### HIST1H1E focal deletions

chr 6 position

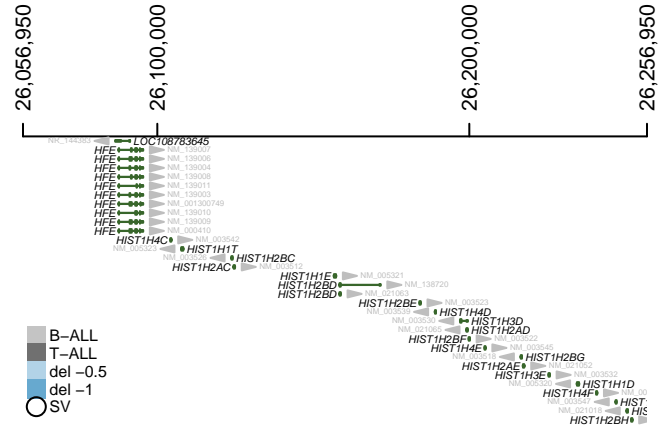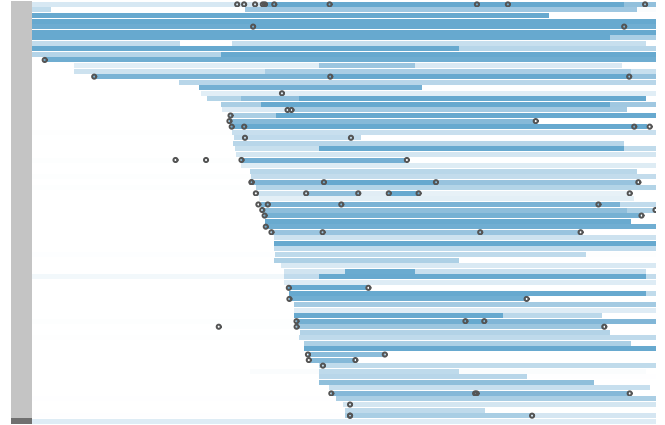

### HIST1H1D focal deletions

chr 6 position

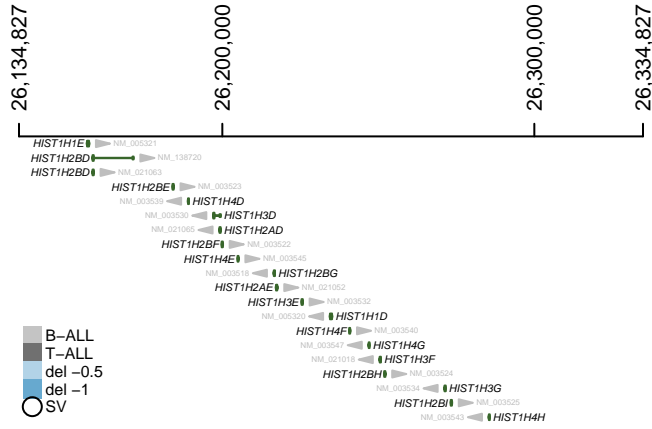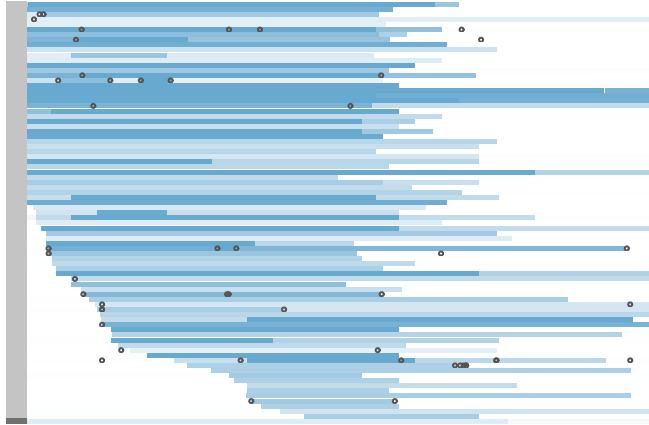

### HIST1H1T focal deletions

chr 6 position

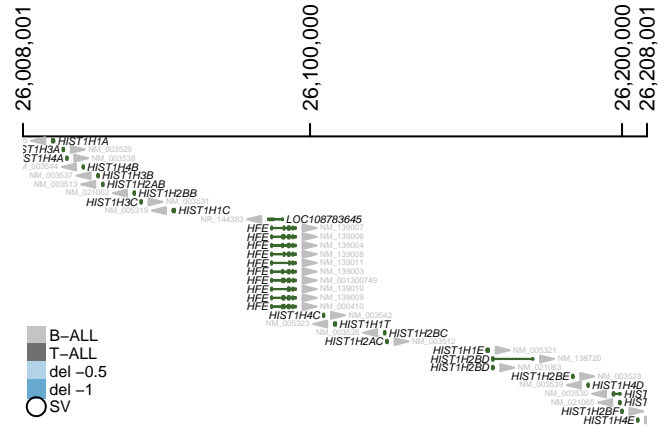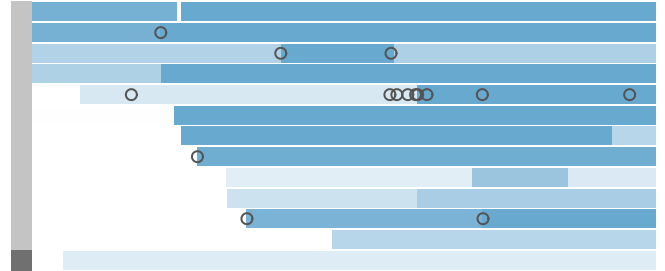

### HIST1H2AB focal deletions

chr 6 position

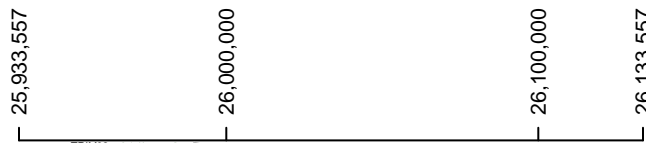

B-ALL  
T-ALL  
del -0.5  
del -1  
SV

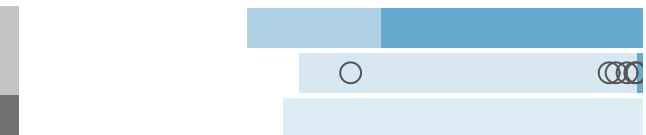

### HIST1H2AD focal deletions

chr 6 position

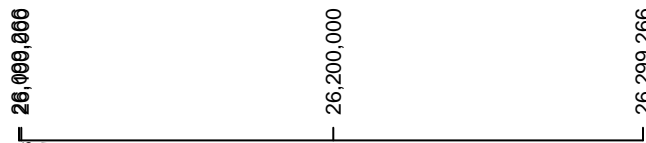

B-ALL  
T-ALL  
del -0.5  
del -1  
SV

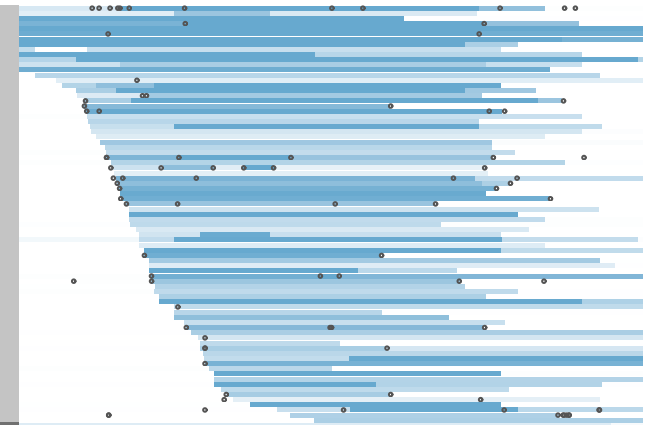

### HIST1H2AC focal deletions

chr 6 position

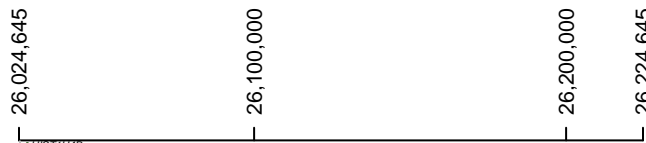

B-ALL  
T-ALL  
del -0.5  
del -1  
SV

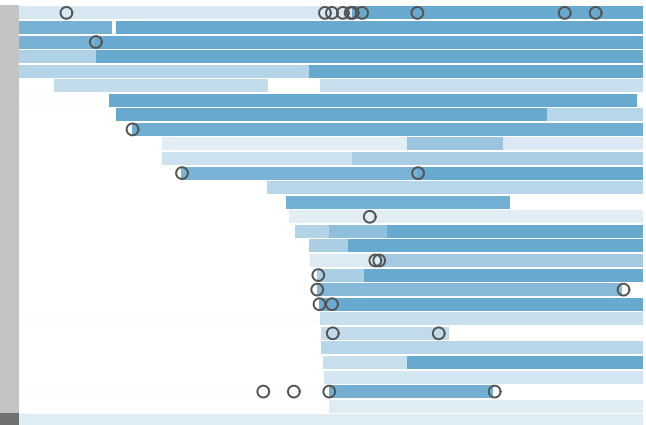

### HIST1H2AE focal deletions

chr 6 position

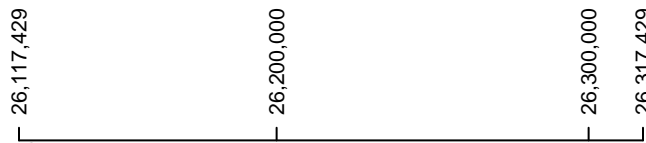

B-ALL  
T-ALL  
del -0.5  
del -1  
SV

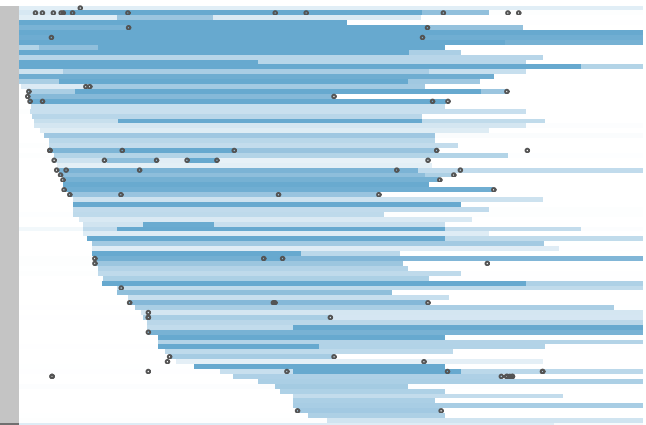

### HIST1H2AG focal deletions

chr 6 position

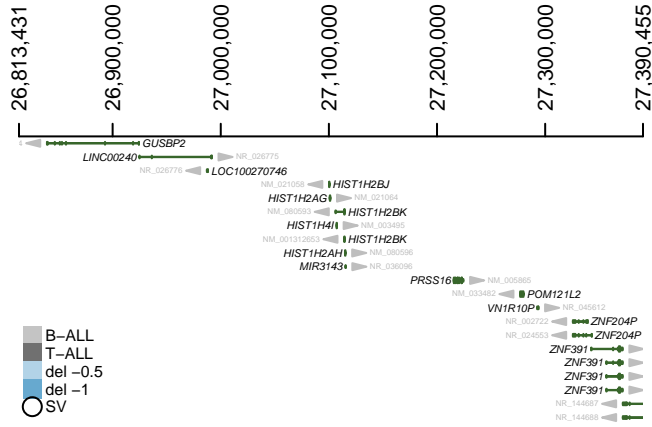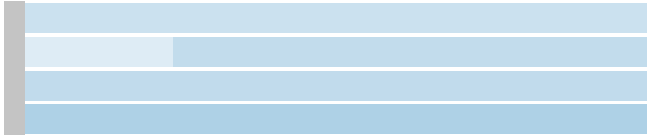

### HIST1H2AI focal deletions

chr 6 position

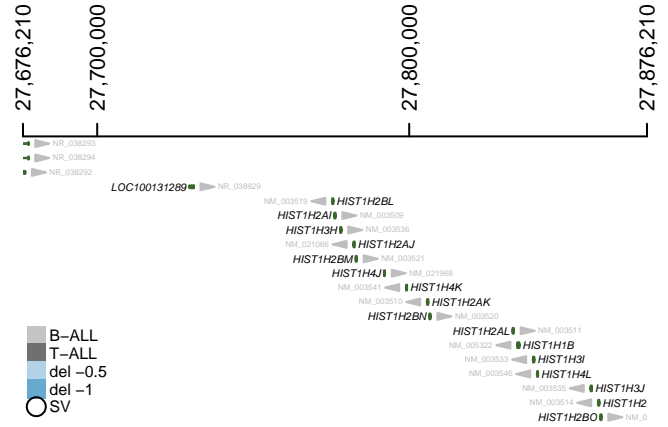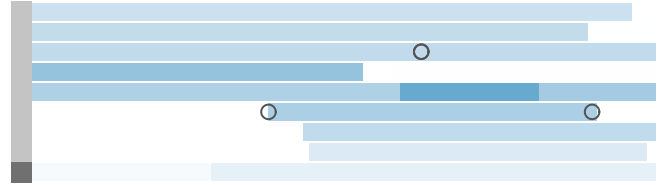

### HIST1H2AH focal deletions

chr 6 position

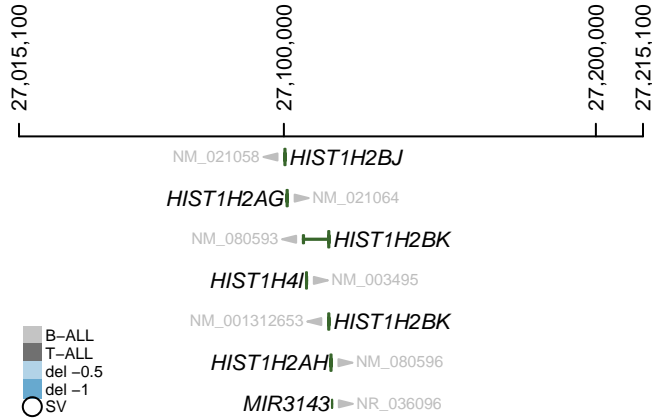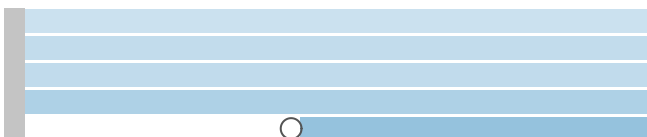

### HIST1H2AJ focal deletions

chr 6 position

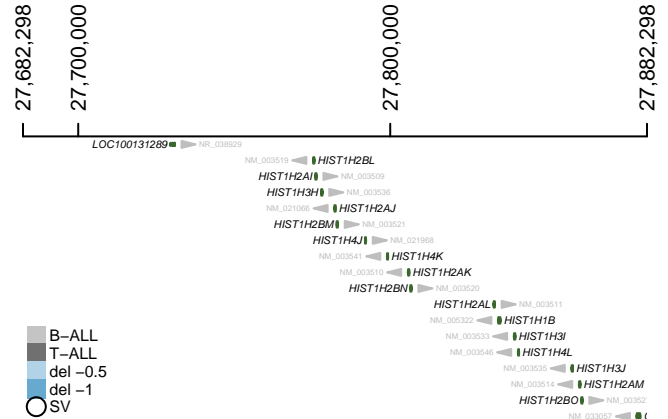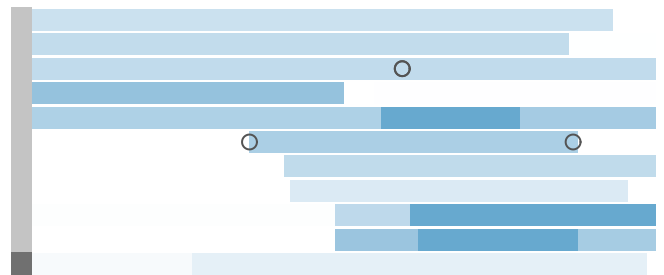



### HIST1H2BC focal deletions

chr 6 position

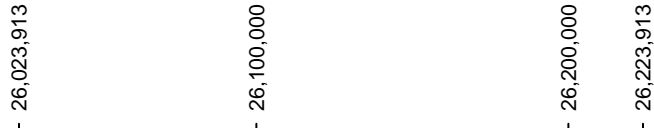

B-ALL  
T-ALL  
del -0.5  
del -1  
SV

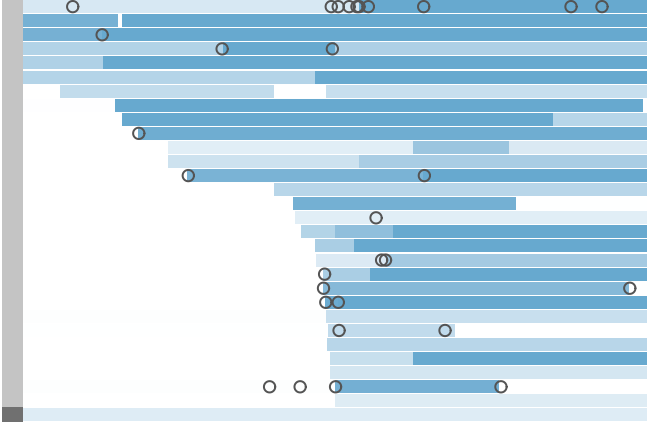

### HIST1H2BE focal deletions

chr 6 position

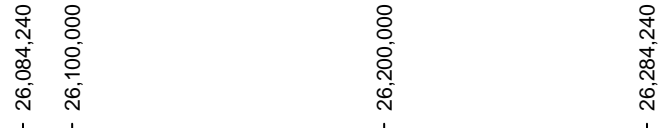

B-ALL  
T-ALL  
del -0.5  
del -1  
SV

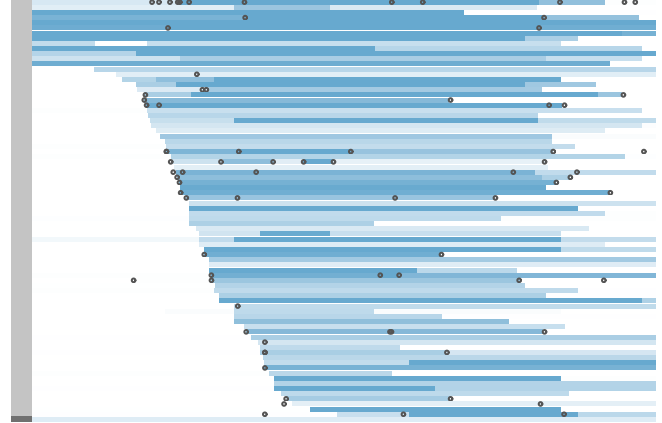

### HIST1H2BD focal deletions

chr 6 position

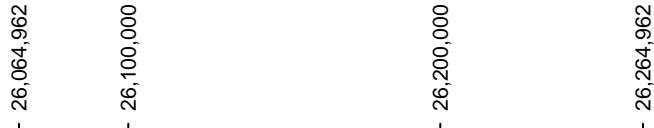

B-ALL  
T-ALL  
del -0.5  
del -1  
SV

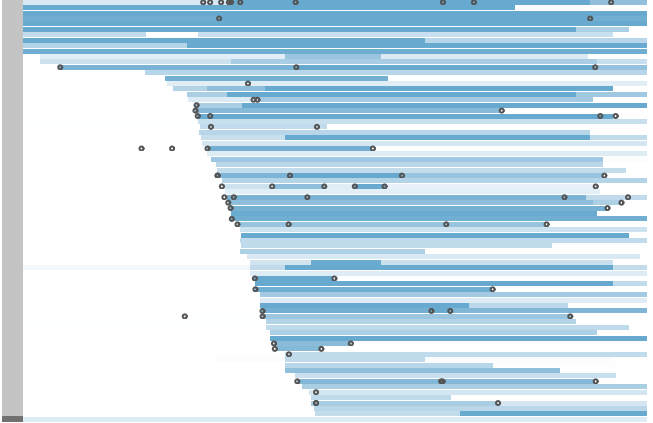

### HIST1H2BF focal deletions

chr 6 position

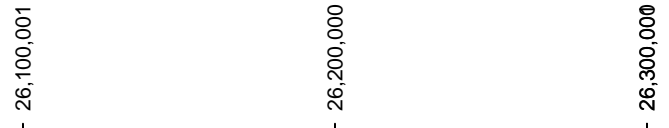

B-ALL  
T-ALL  
del -0.5  
del -1  
SV

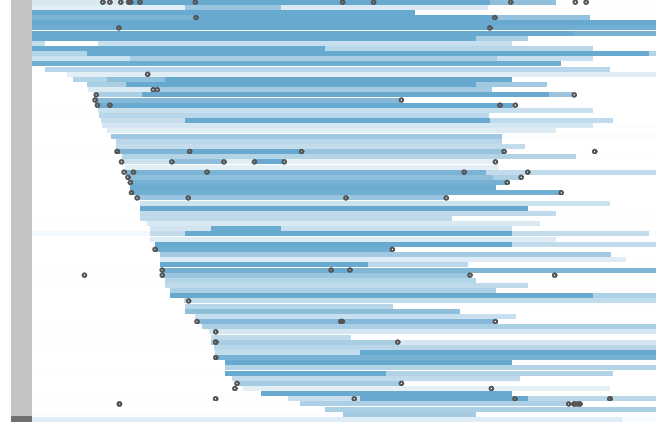

### HIST1H2BG focal deletions

chr 6 position

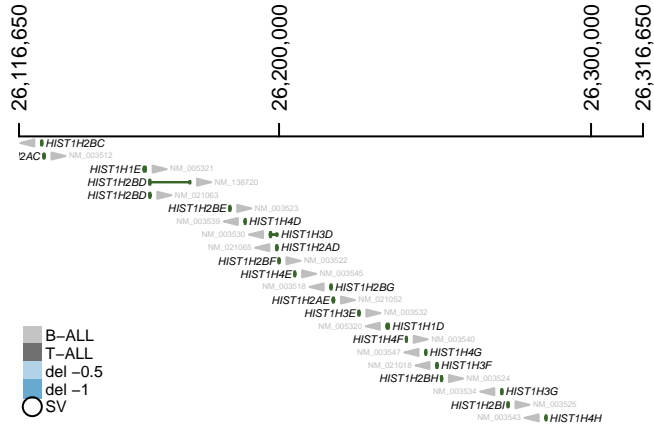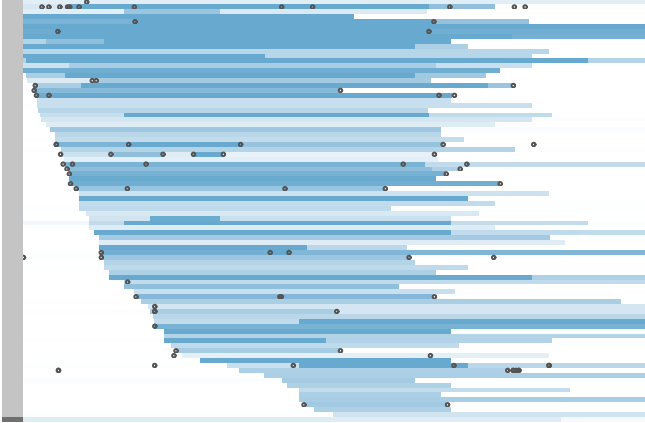

### HIST1H2BI focal deletions

chr 6 position

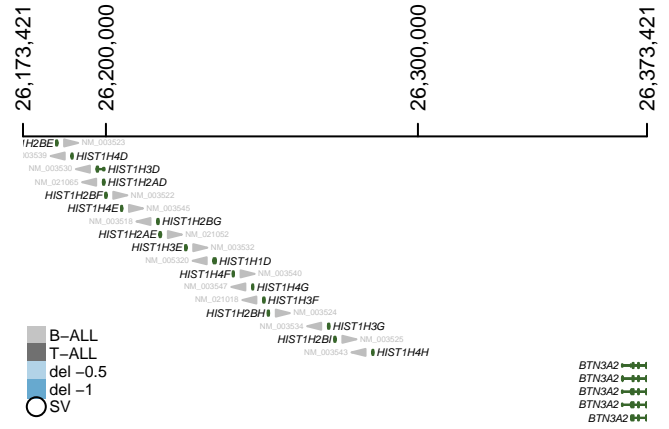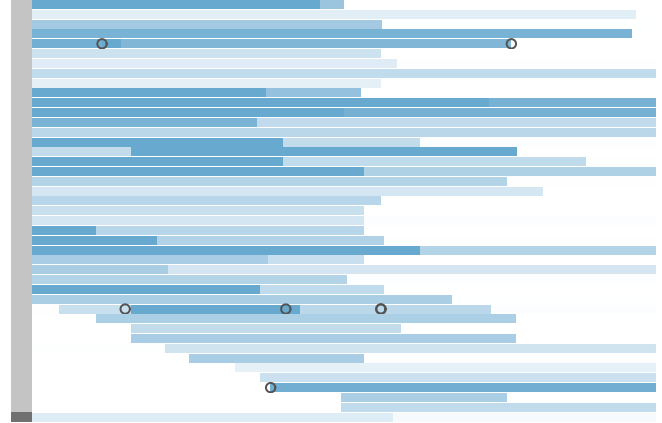

### HIST1H2BH focal deletions

chr 6 position

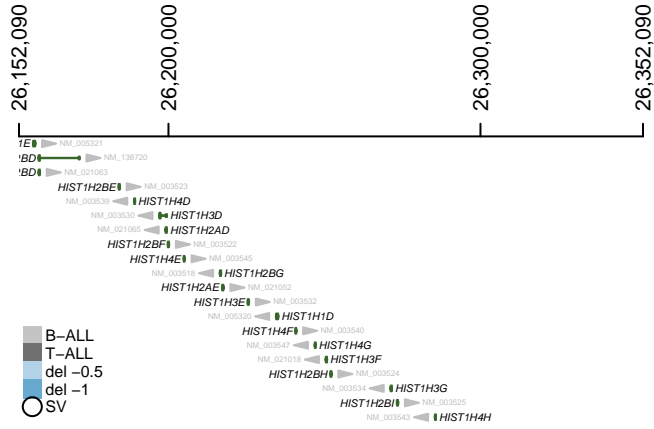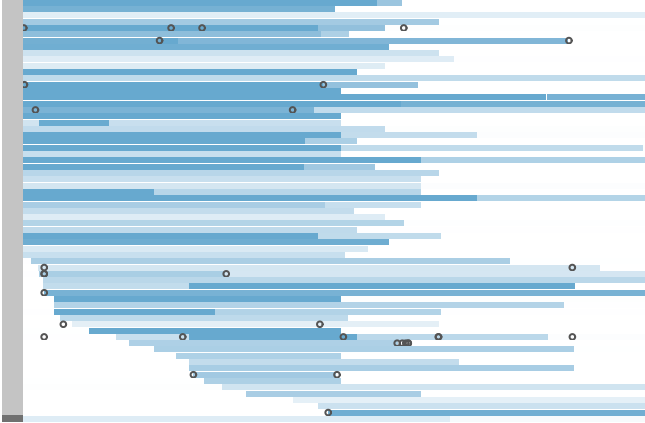

### HIST1H2BJ focal deletions

chr 6 position

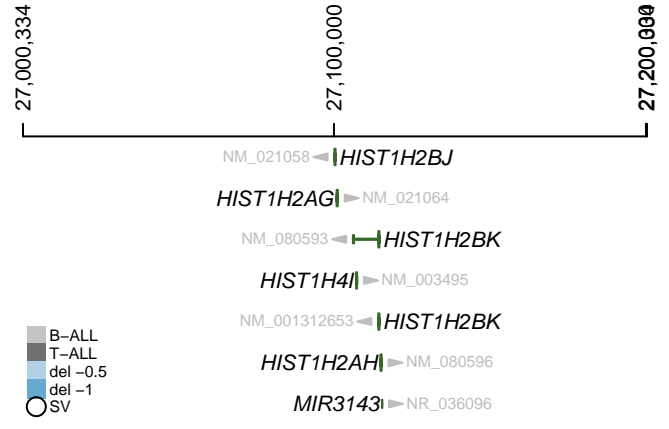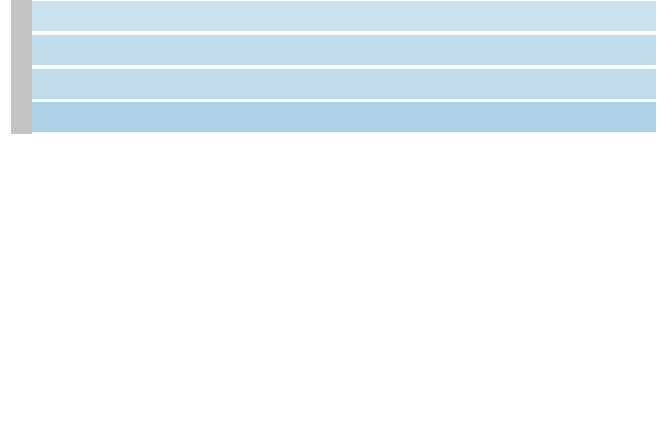

### HIST1H2BK focal deletions

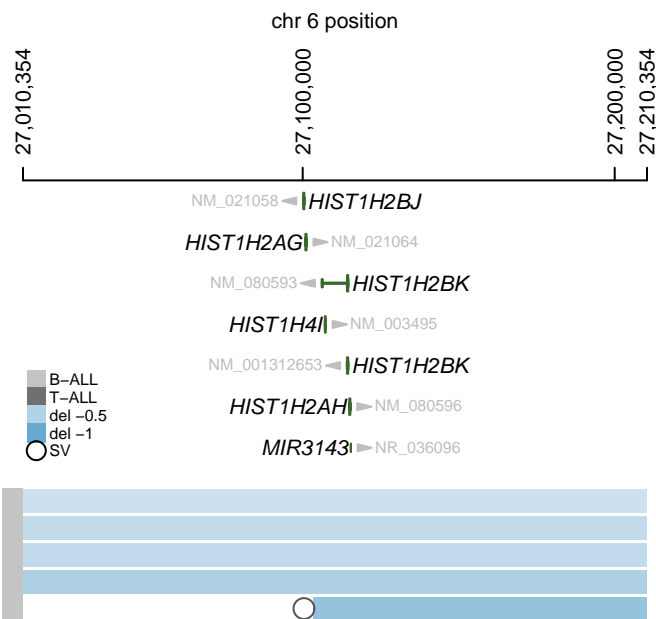

### HIST1H2BM focal deletions

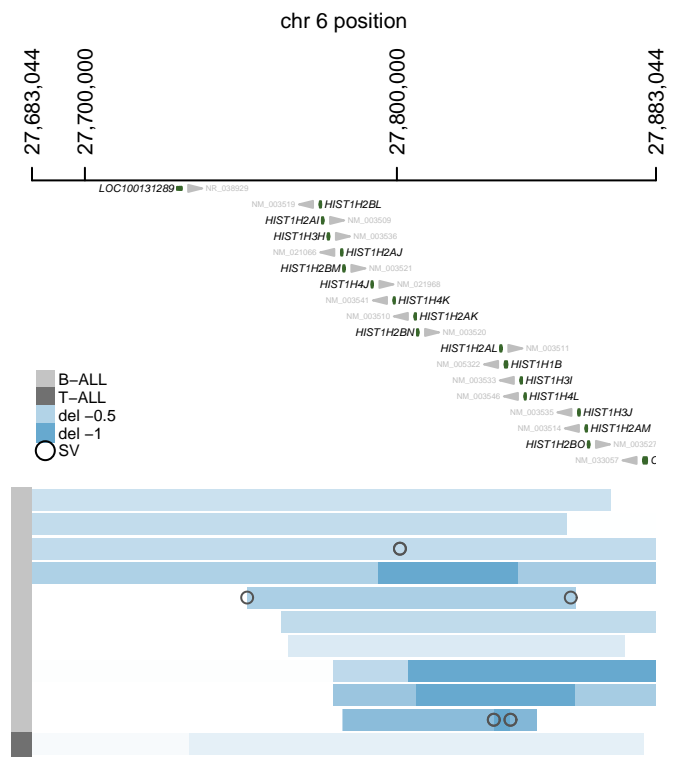

### HIST1H2BL focal deletions

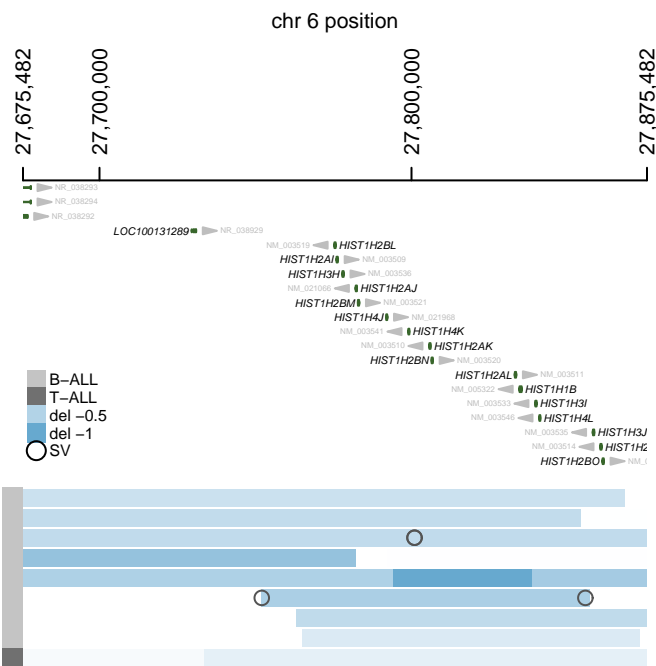

### HIST1H2BN focal deletions

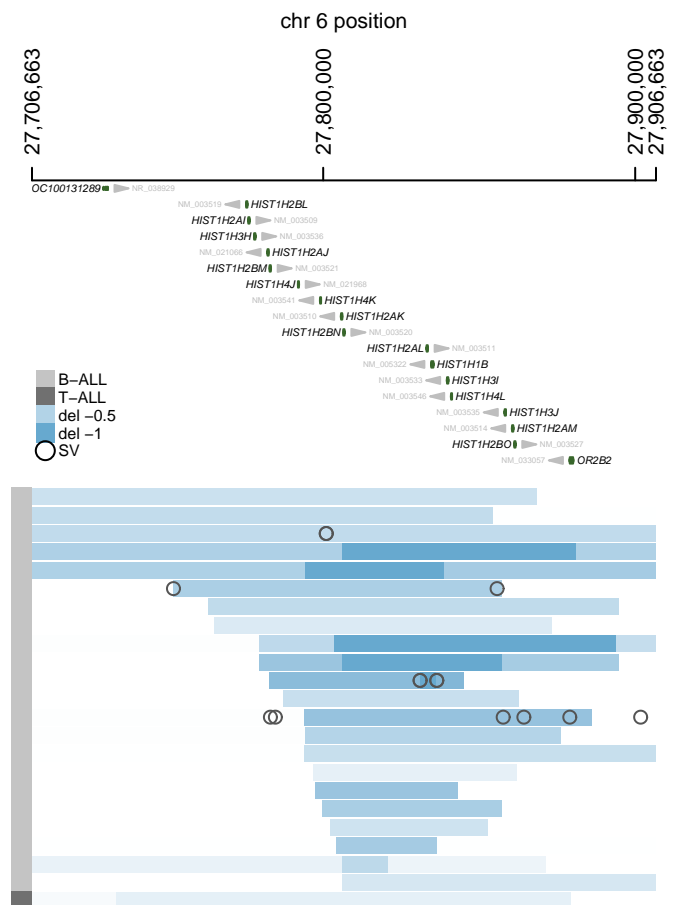

### HIST1H2BO focal deletions

chr 6 position

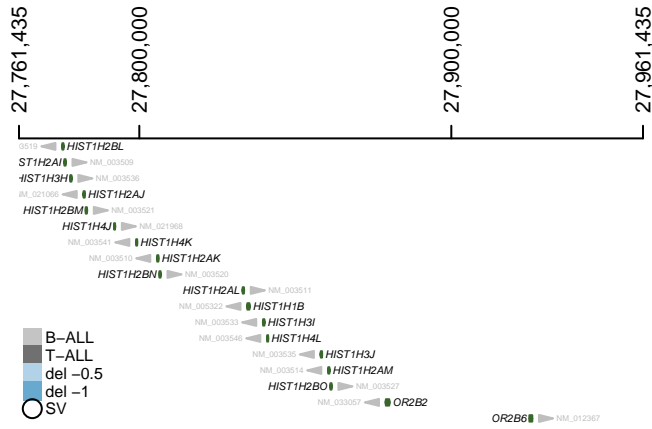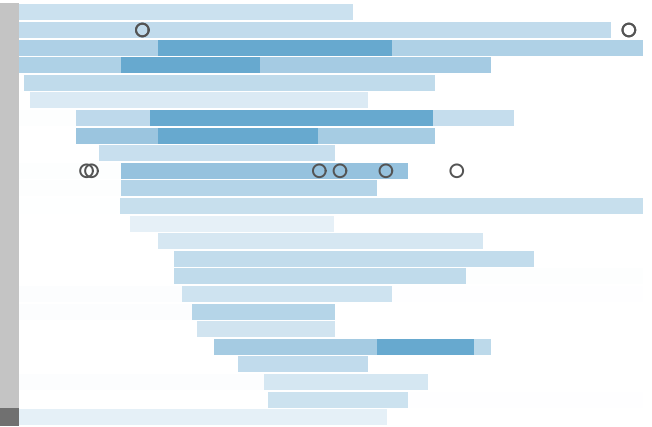

### HIST1H3B focal deletions

chr 6 position

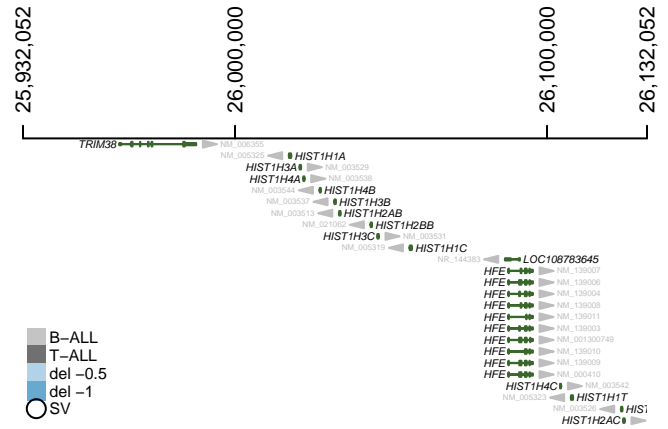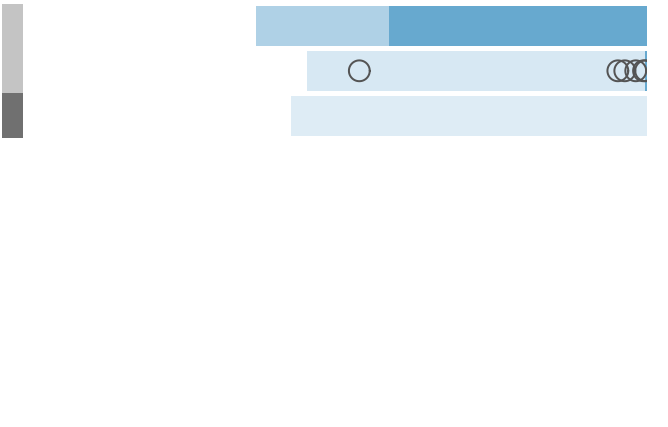

### HIST1H3A focal deletions

chr 6 position

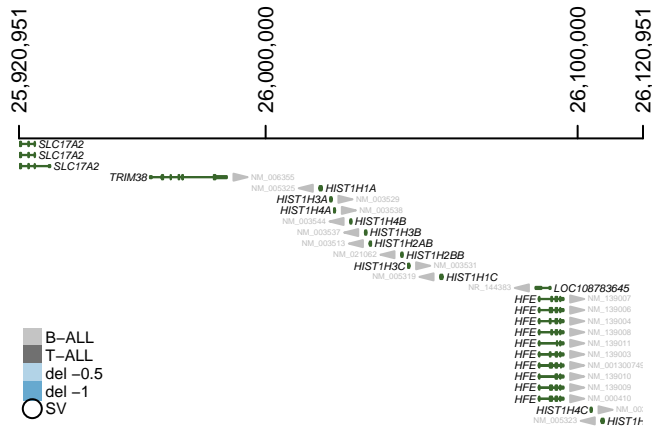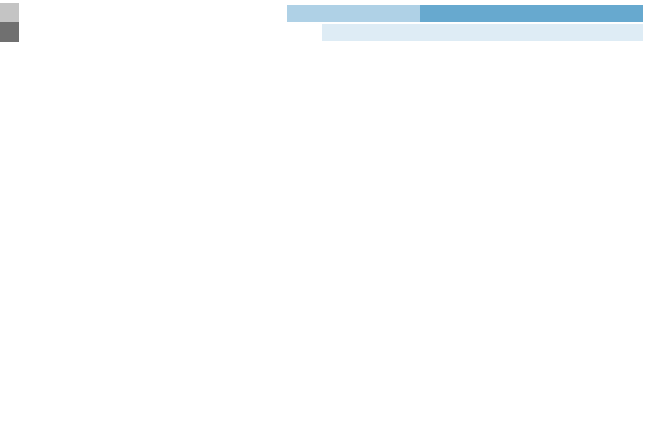

### HIST1H3C focal deletions

chr 6 position

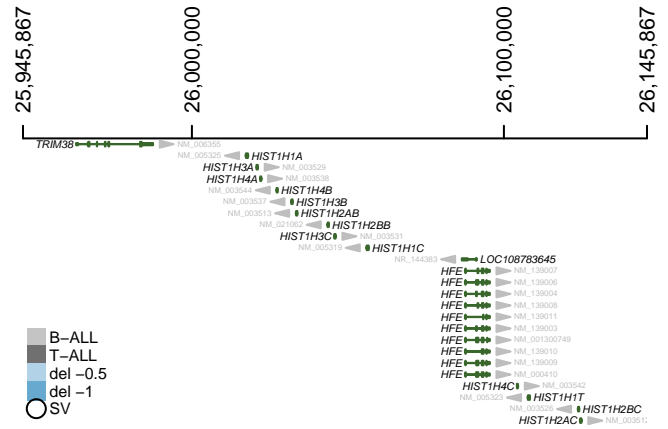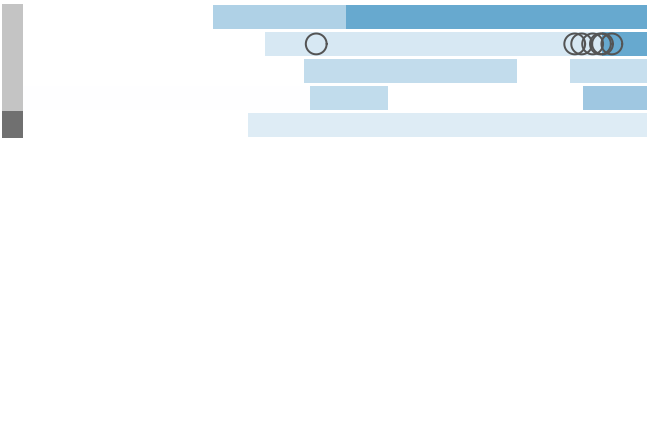



### HIST1H3D focal deletions

chr 6 position

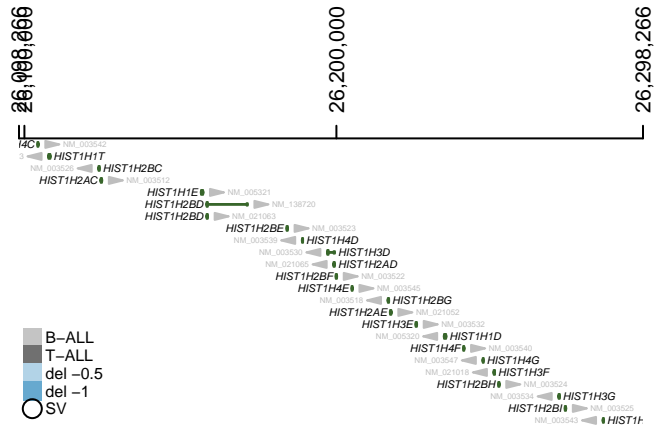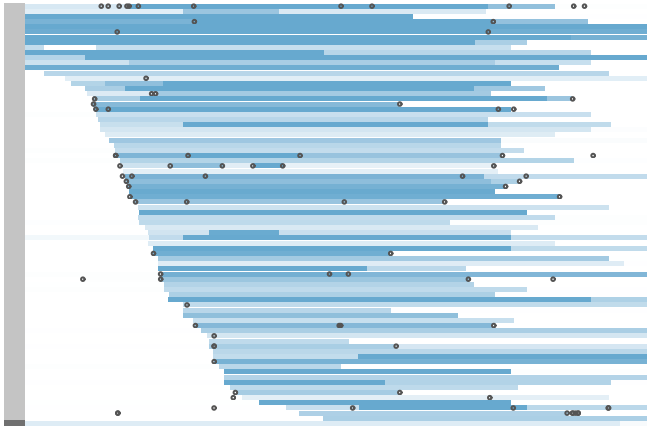

### HIST1H3F focal deletions

chr 6 position

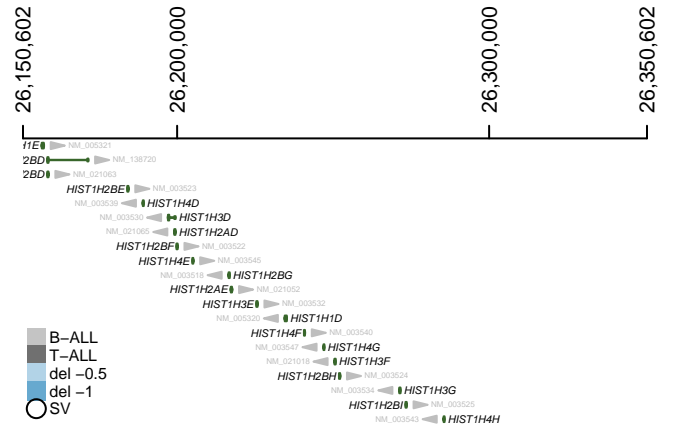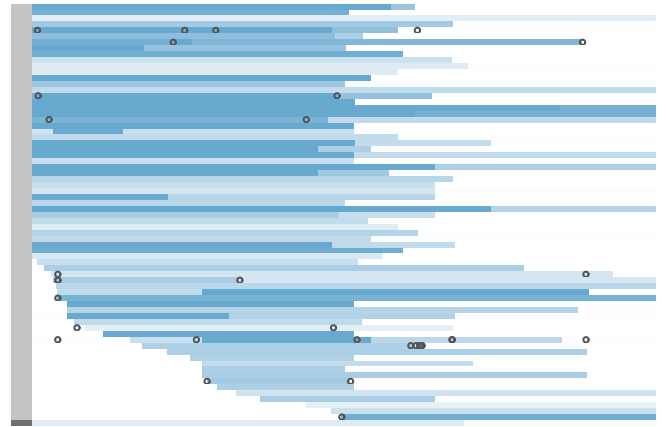

### HIST1H3E focal deletions

chr 6 position

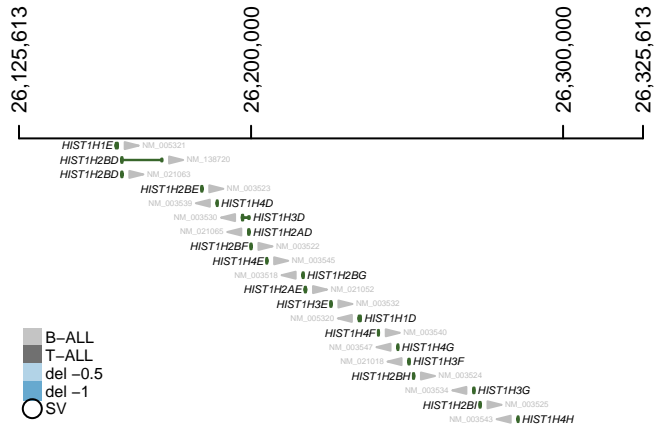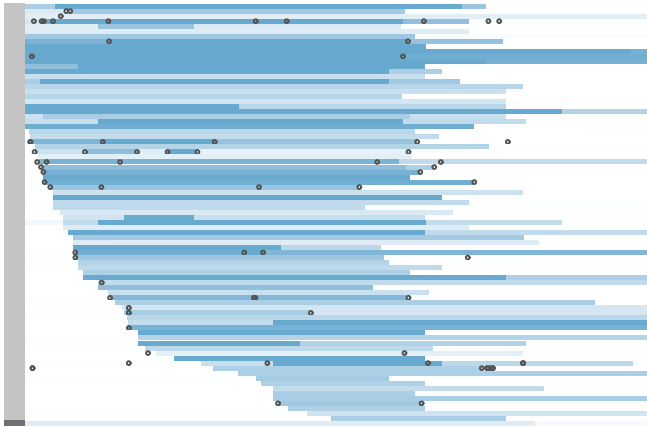

### HIST1H3G focal deletions

chr 6 position

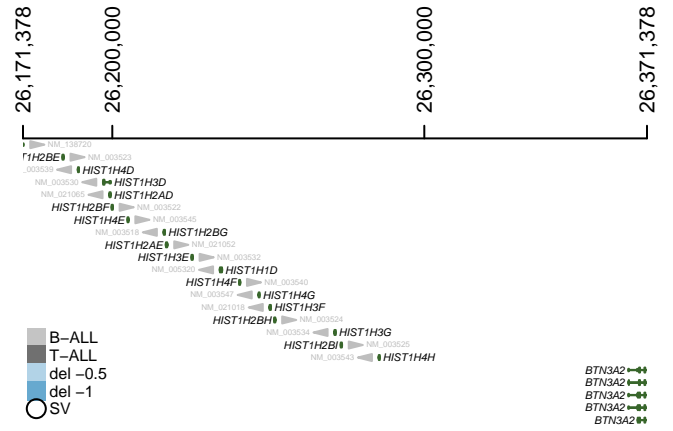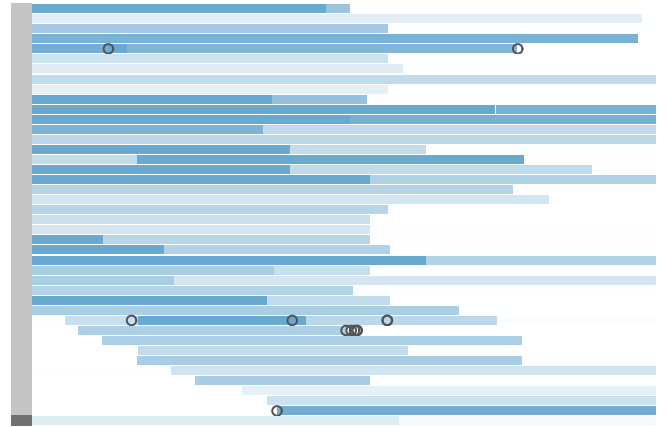

BTN3A2  
BTN3A2  
BTN3A2  
BTN3A2  
BTN3A2

### HIST1H3H focal deletions

chr 6 position

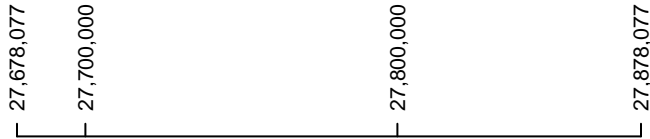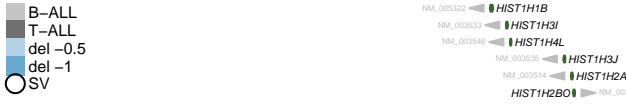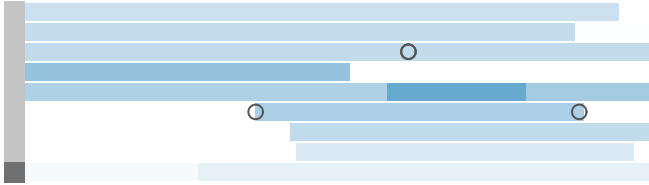

### HIST1H3J focal deletions

chr 6 position

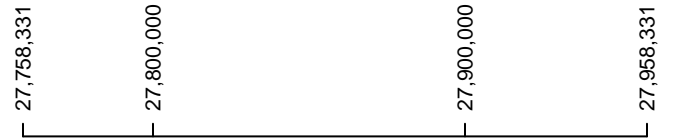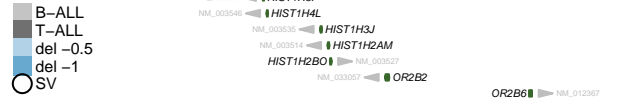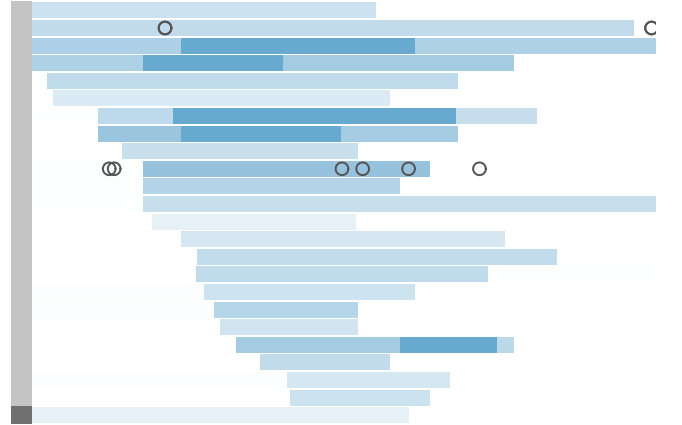

### HIST1H3I focal deletions

chr 6 position

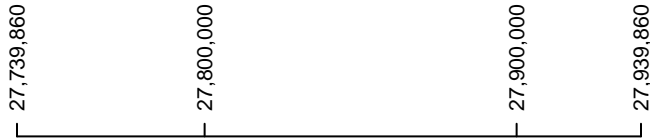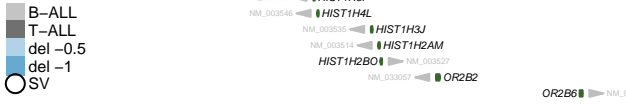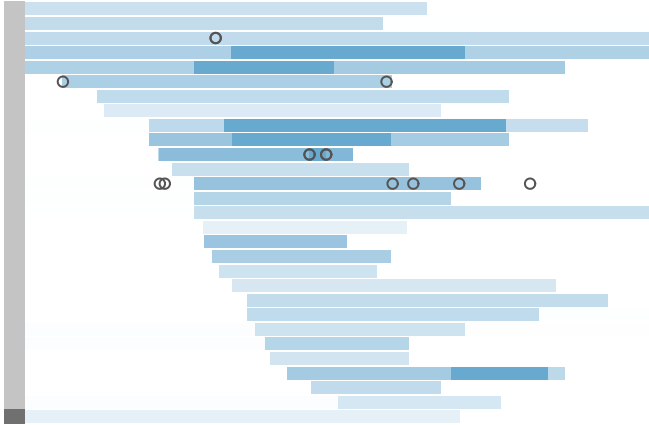

### HIST1H4A focal deletions

chr 6 position

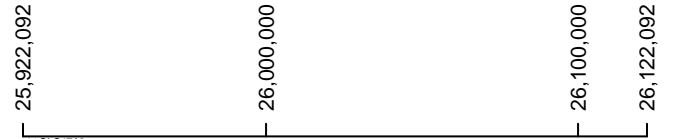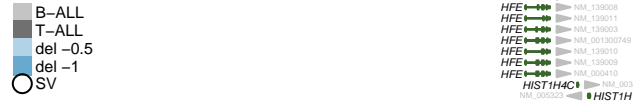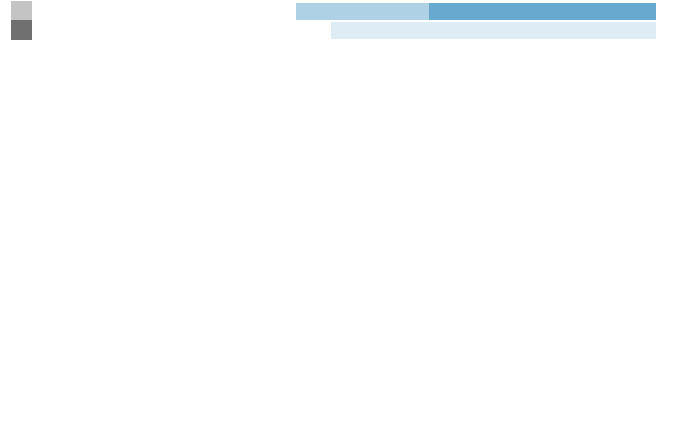

### HIST1H4B focal deletions

chr 6 position

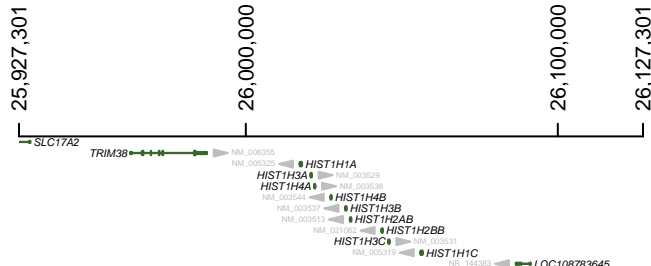

B-ALL  
 T-ALL  
 del -0.5  
 del -1  
 SV

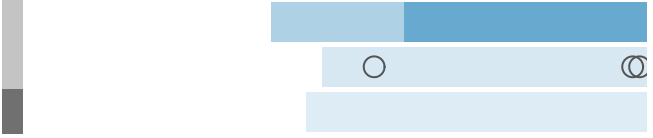

### HIST1H4D focal deletions

chr 6 position

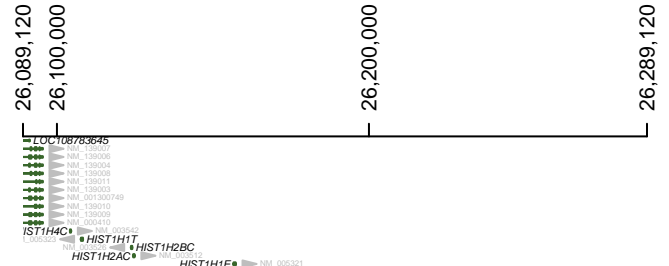

B-ALL  
 T-ALL  
 del -0.5  
 del -1  
 SV

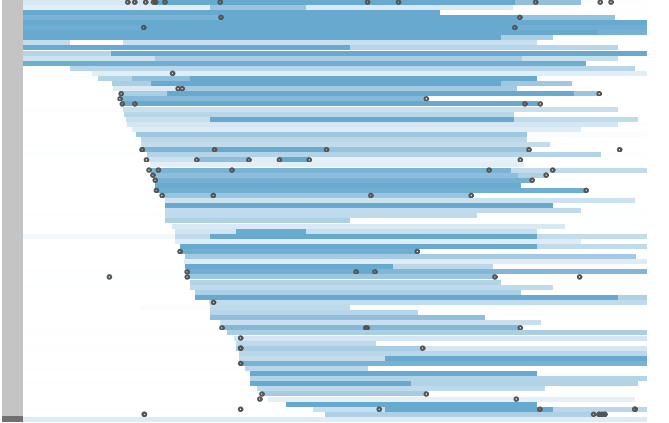

### HIST1H4C focal deletions

chr 6 position

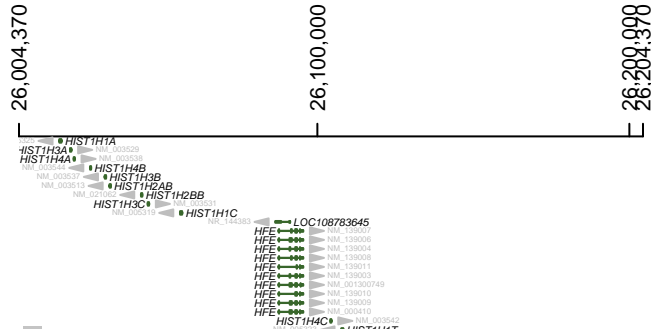

B-ALL  
 T-ALL  
 del -0.5  
 del -1  
 SV

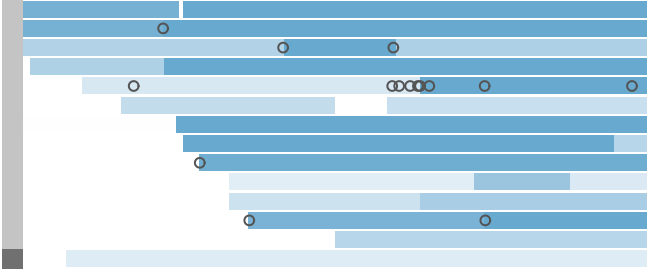

### HIST1H4E focal deletions

chr 6 position

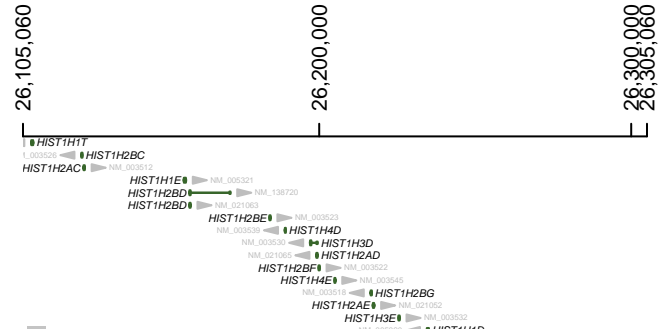

B-ALL  
 T-ALL  
 del -0.5  
 del -1  
 SV

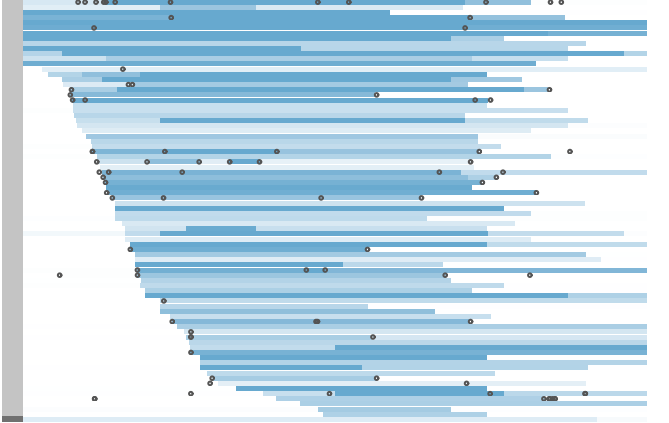

### HIST1H4F focal deletions

chr 6 position

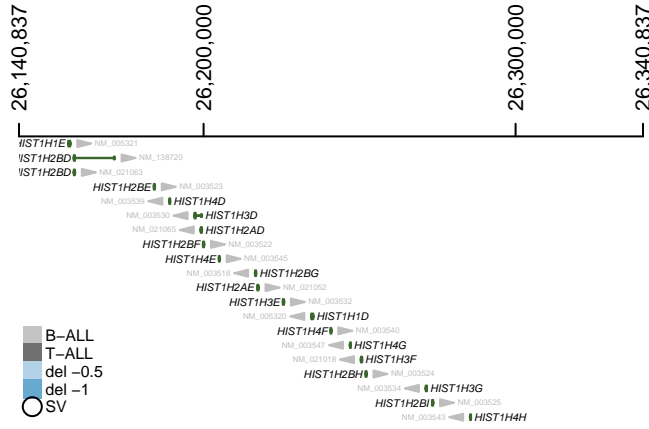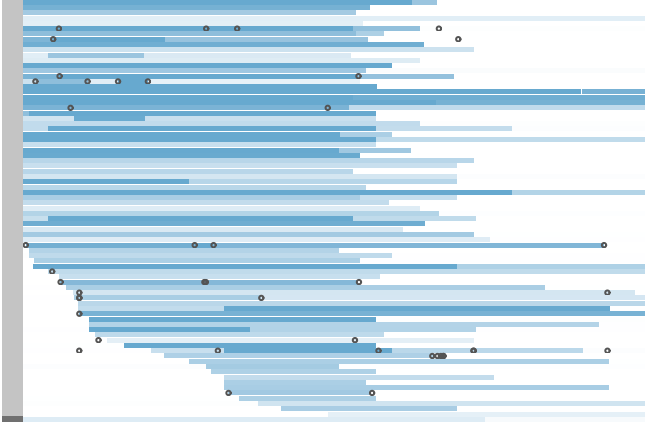

### HIST1H4H focal deletions

chr 6 position

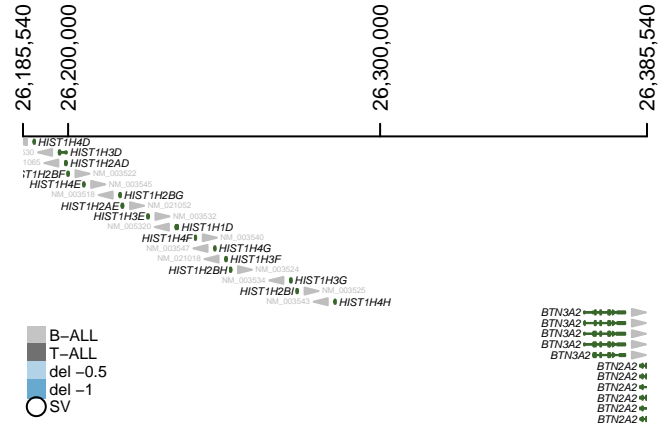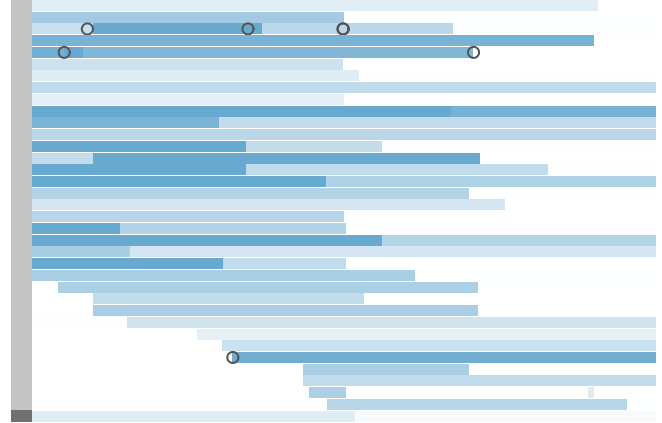

### HIST1H4G focal deletions

chr 6 position

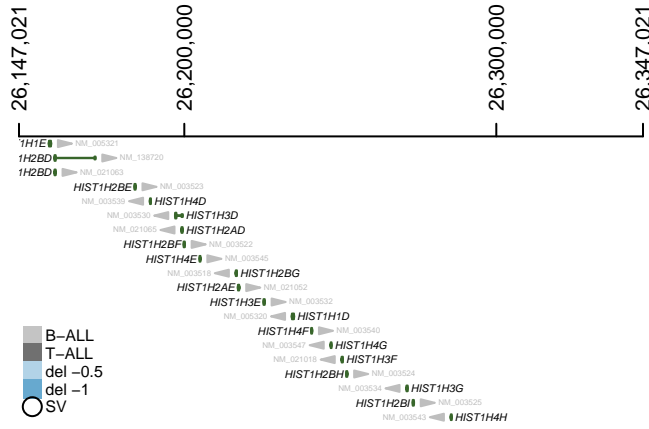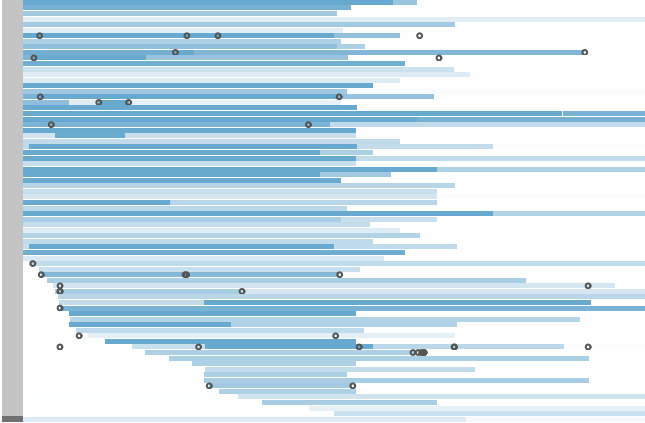

### HIST1H4I focal deletions

chr 6 position

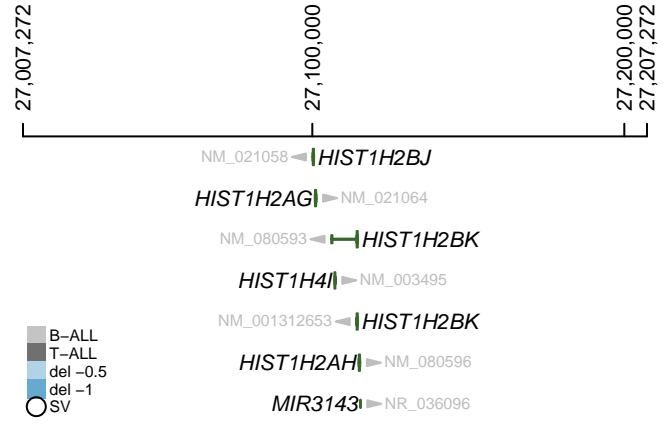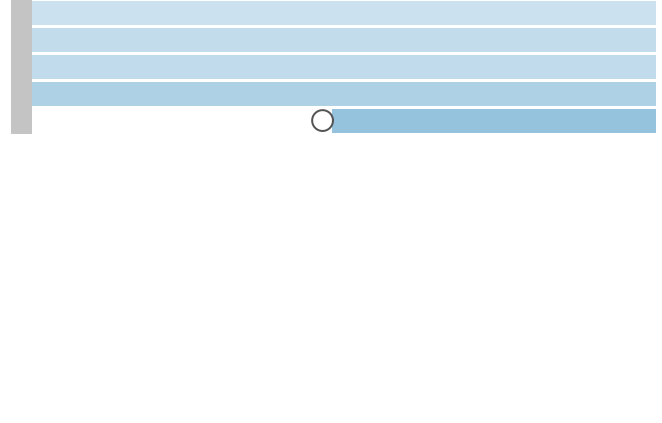

### HIST1H4J focal deletions

chr 6 position

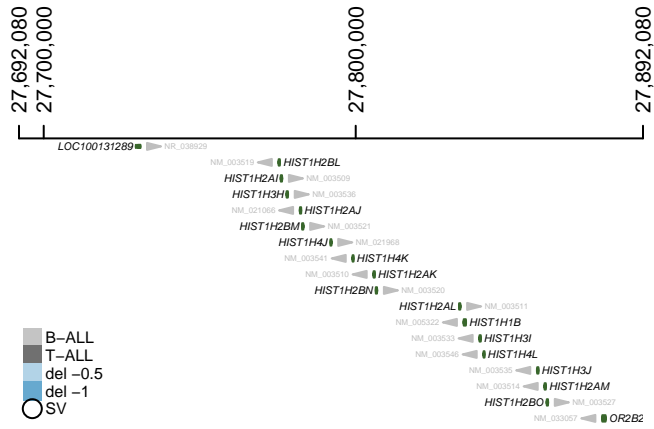

### HIST1H4L focal deletions

chr 6 position

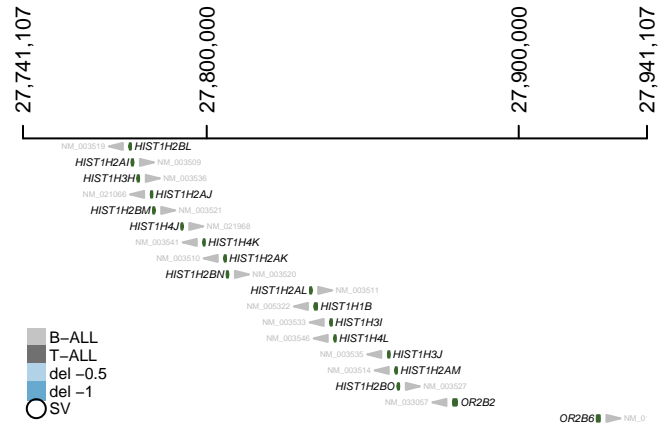

### HIST1H4K focal deletions

chr 6 position

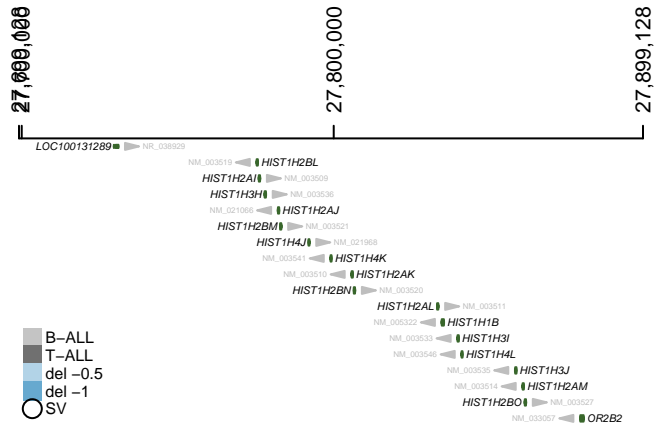

### HMGB1 focal deletions

chr13 position

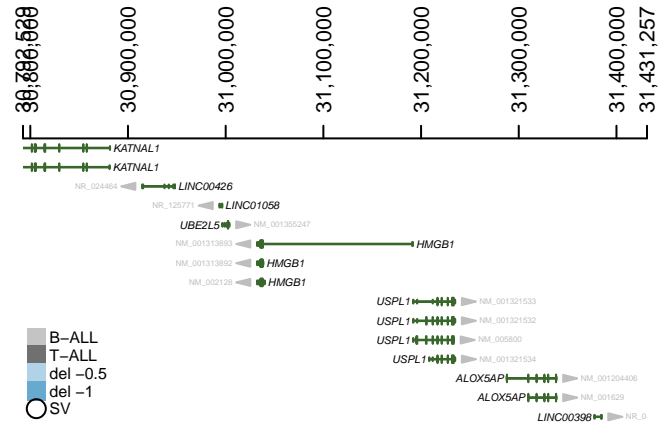

### IKZF1 focal deletions

chr 7 position

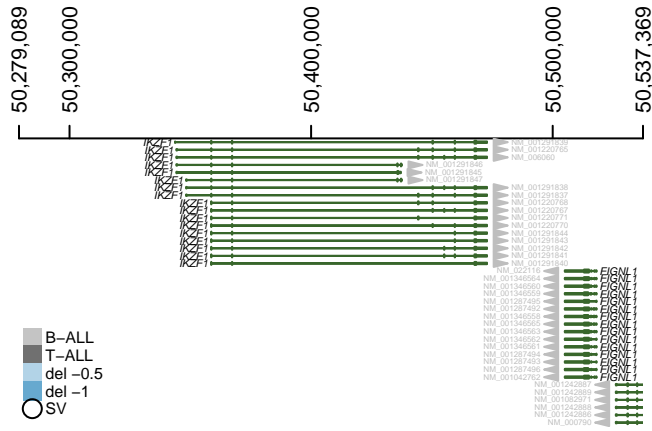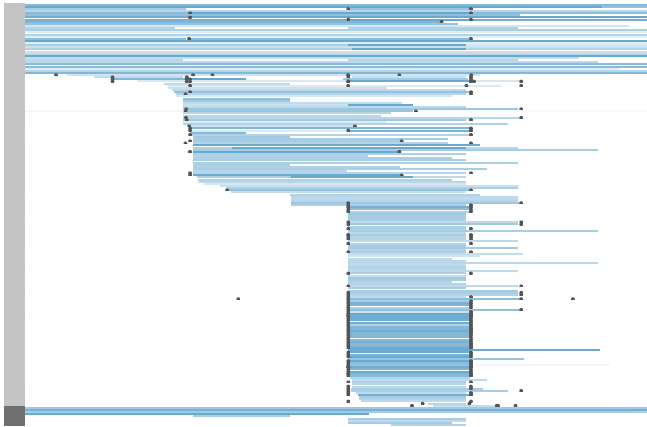

### IKZF3 focal deletions

chr17 position

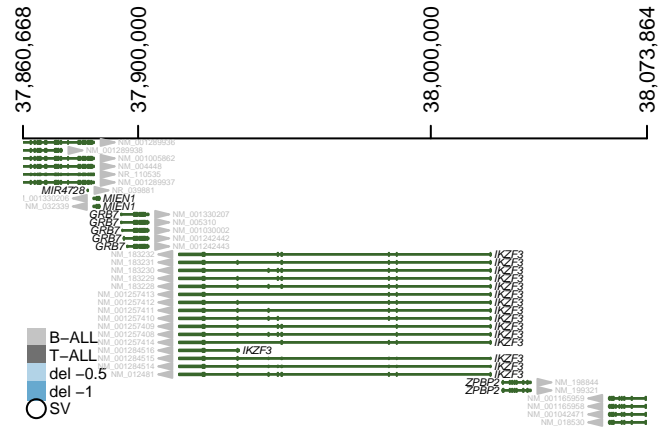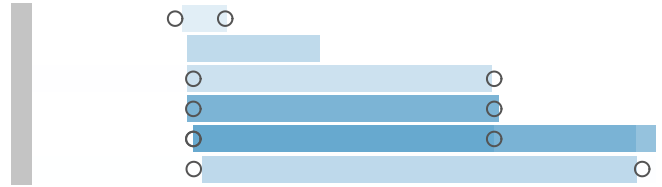

### IKZF2 focal deletions

chr 2 position

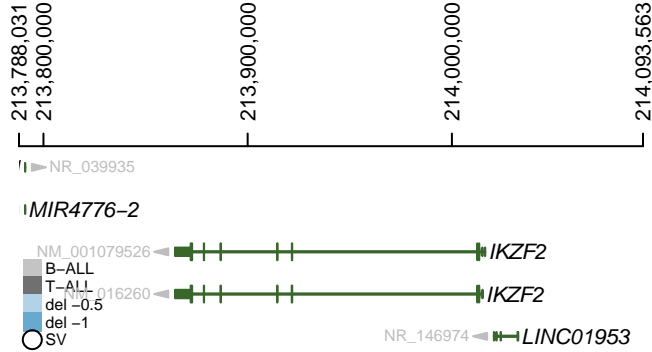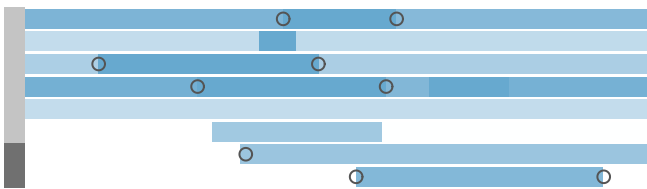

### INO80 focal deletions

chr15 position

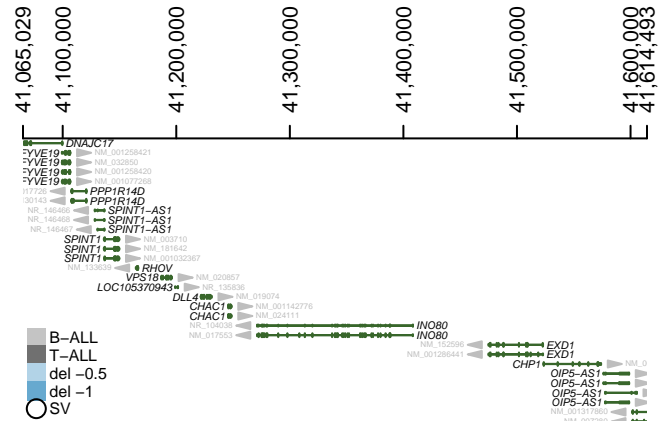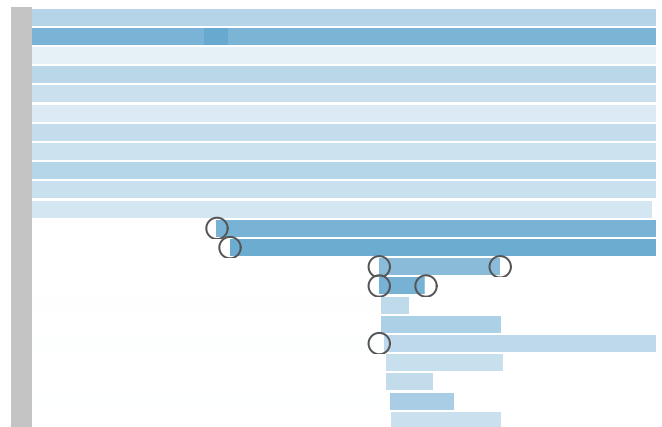

### IRF1 focal deletions

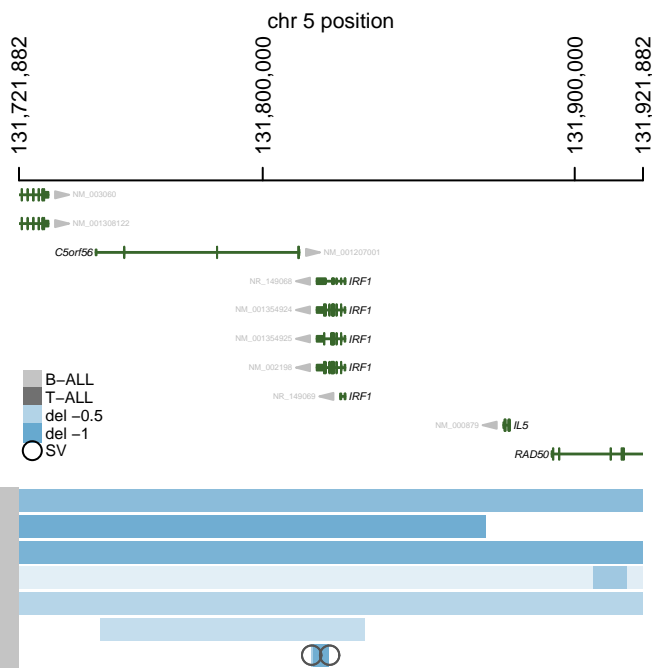

### KIAA1958 focal deletions

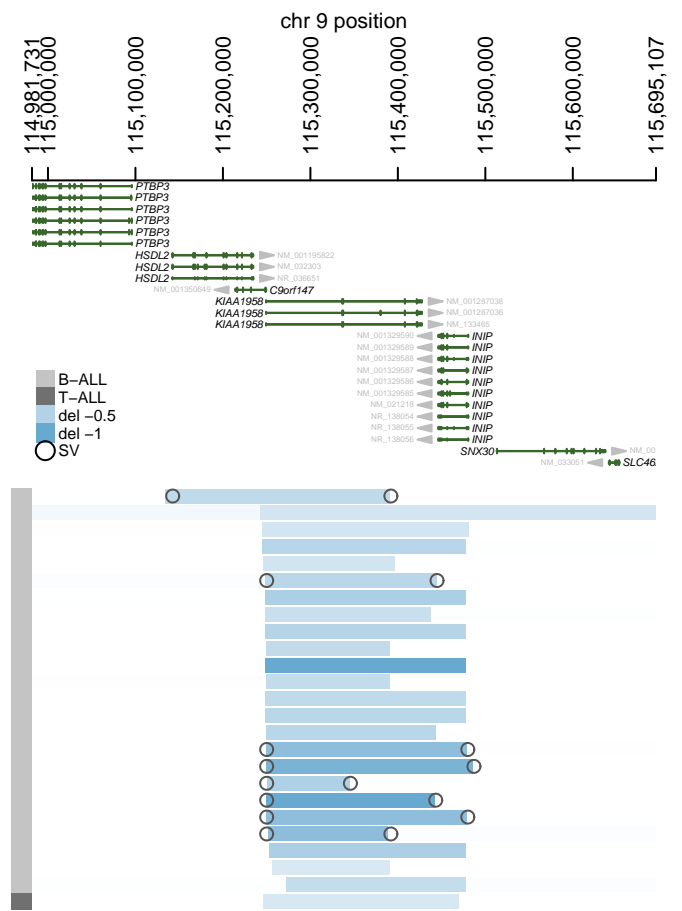

### KDM6A focal deletions

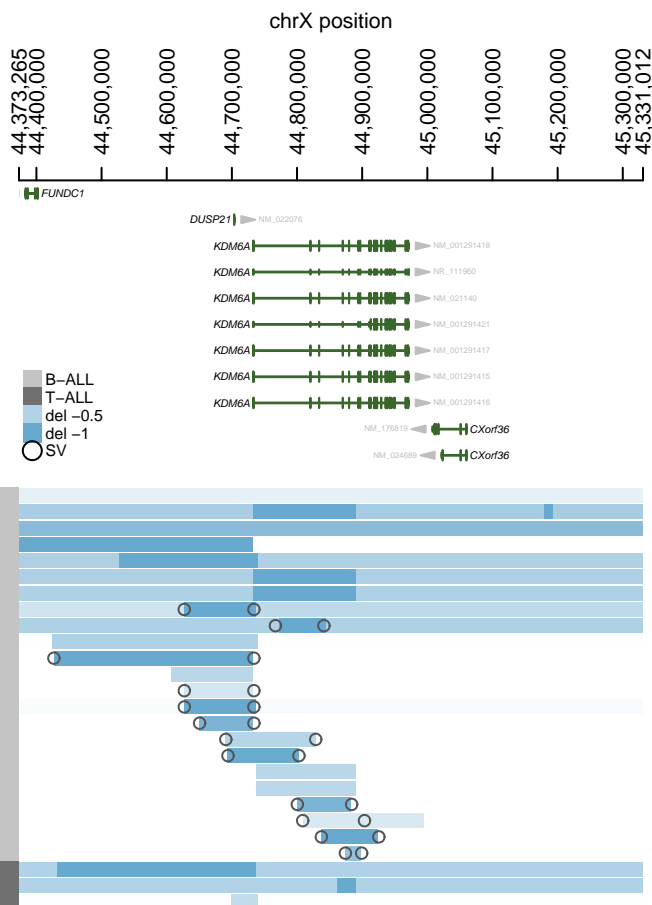

### KMT2C focal deletions

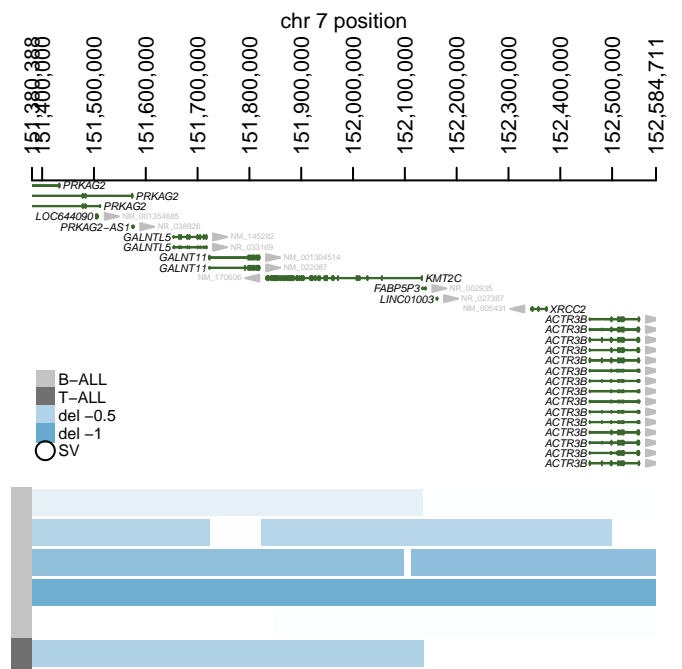

### KMT2D focal deletions

chr12 position

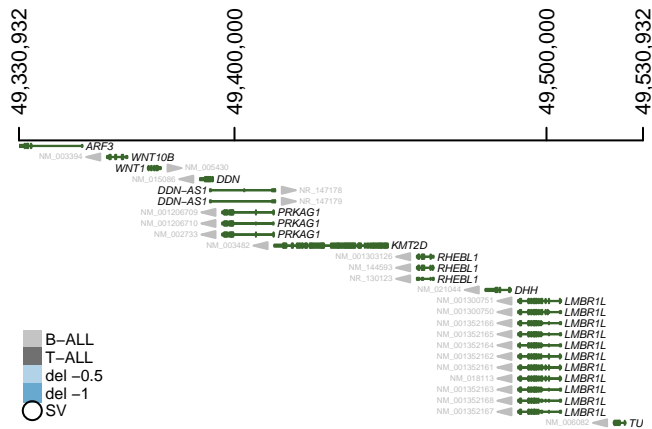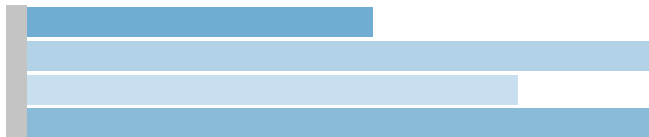

### LCOR focal deletions

chr10 position

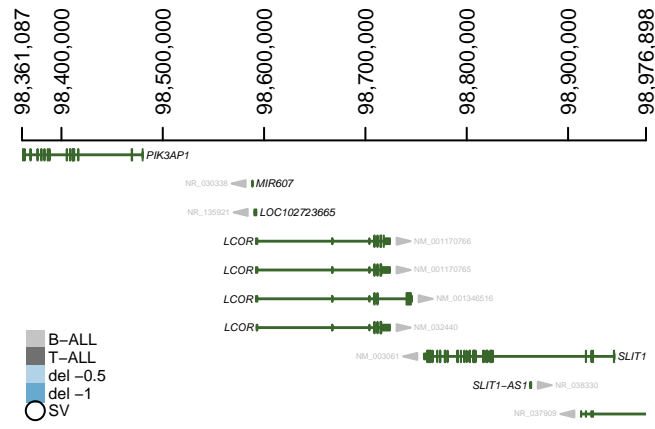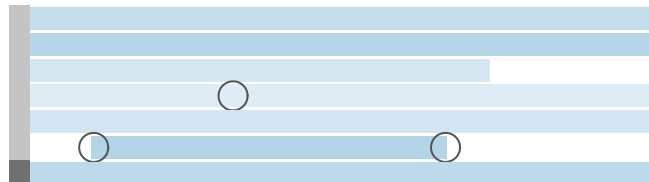

### LCAT focal deletions

chr16 position

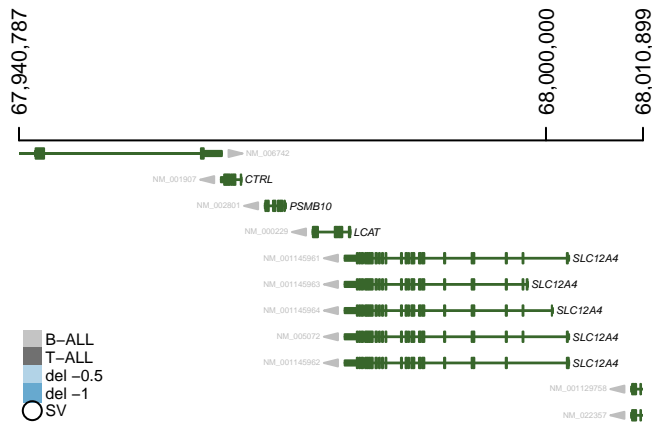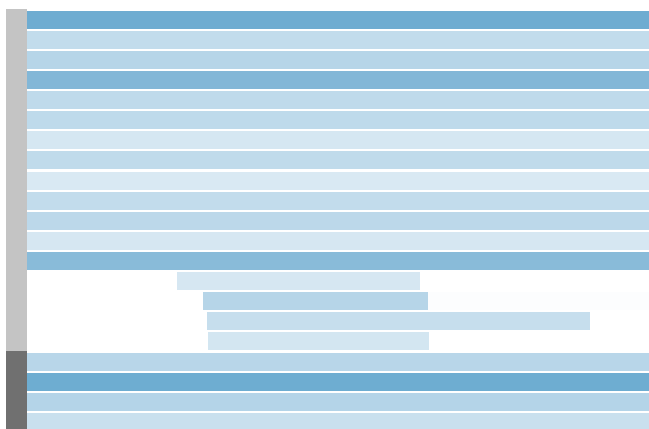

### LEF1 focal deletions

chr 4 position

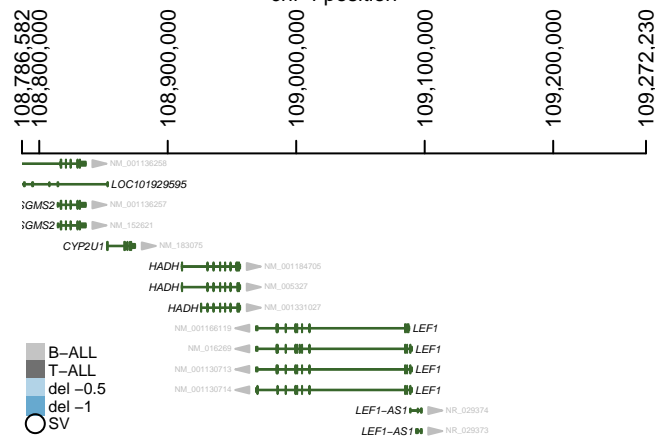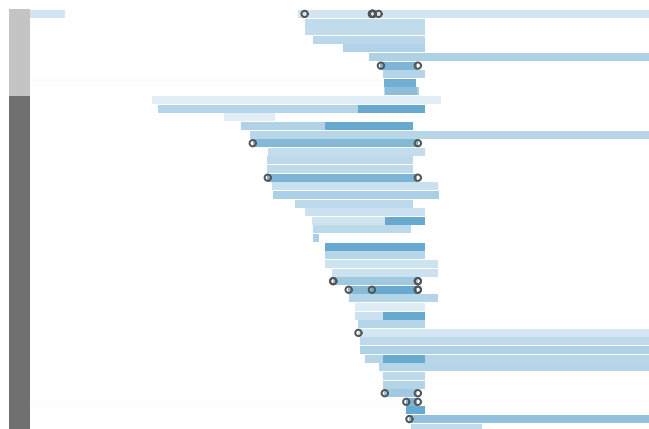



### LEMD3 focal deletions

chr12 position

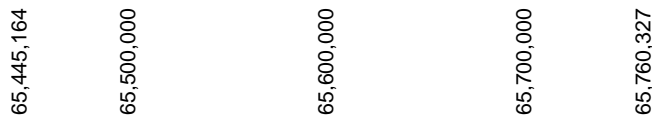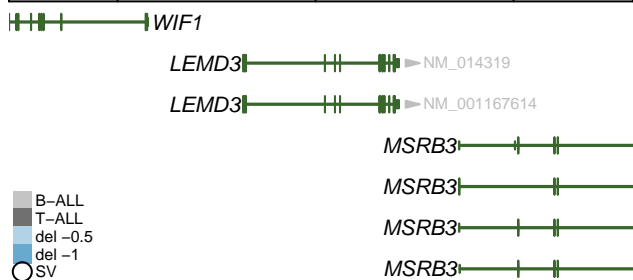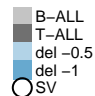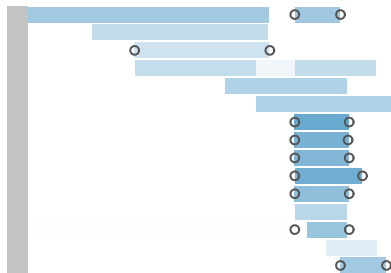

### LINC00649 focal deletions

chr21 position

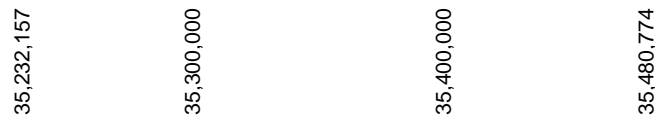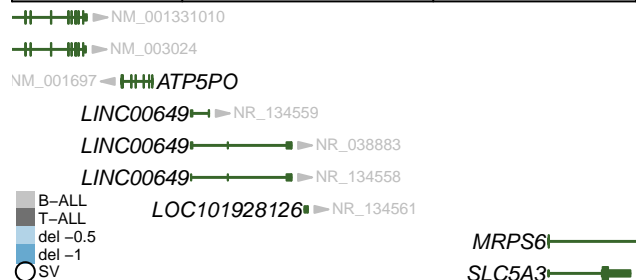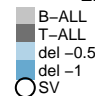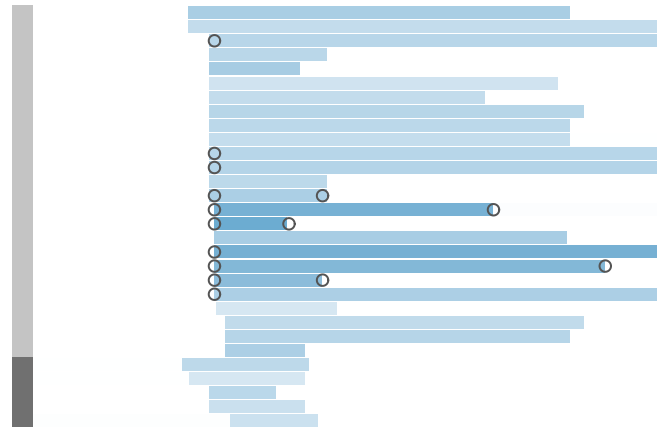

### LETM1 focal deletions

chr 4 position

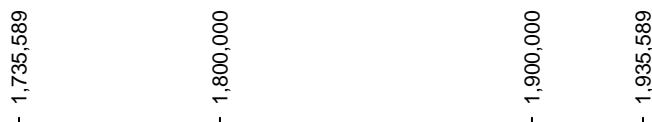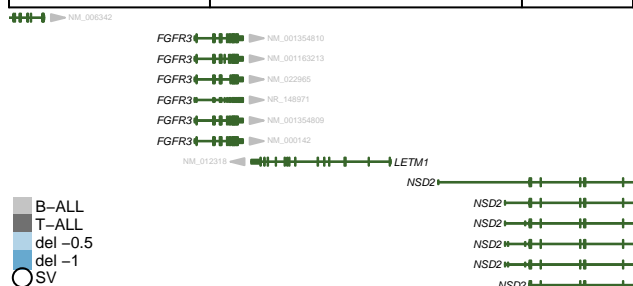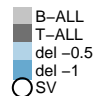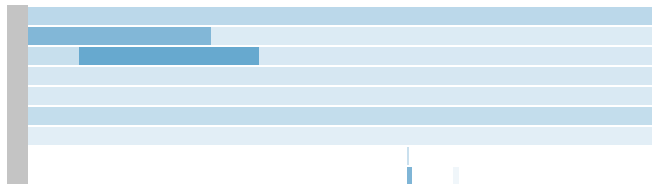

### LINC02227 focal deletions

chr 5 position

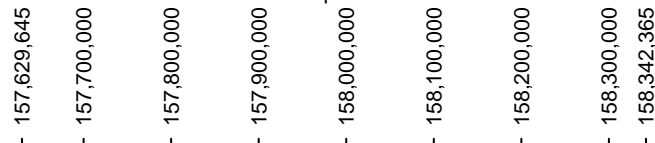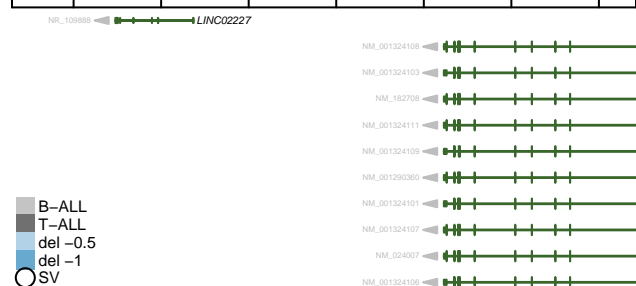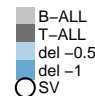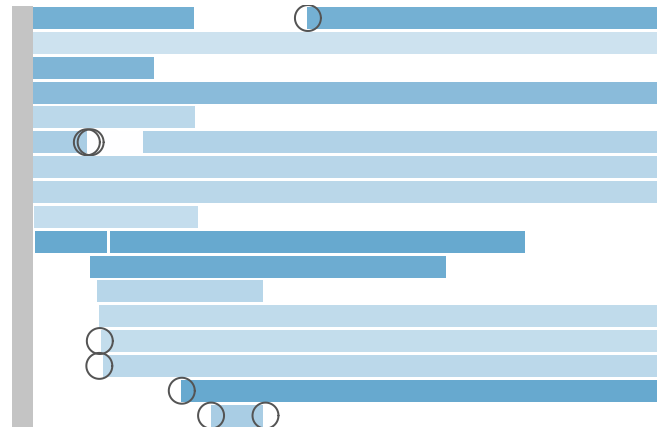

### LZTR1 focal deletions

chr22 position

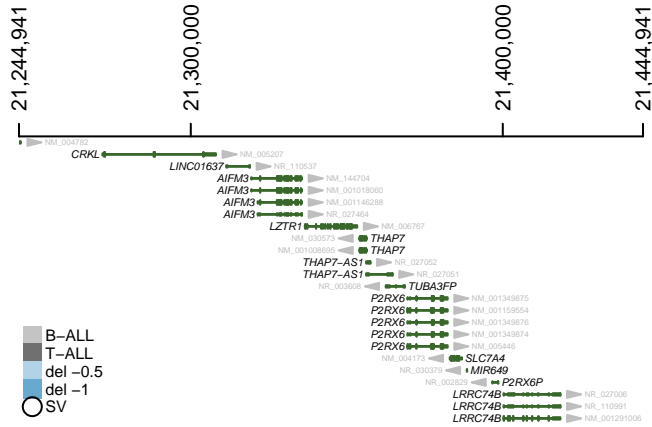

### MBNL1 focal deletions

chr 3 position

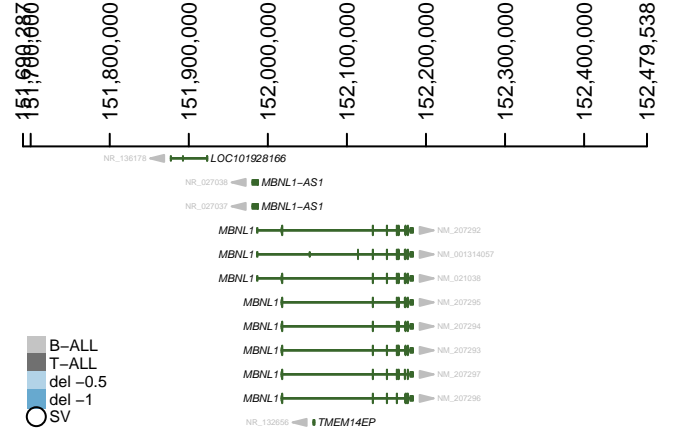

### MAP3K2 focal deletions

chr 2 position

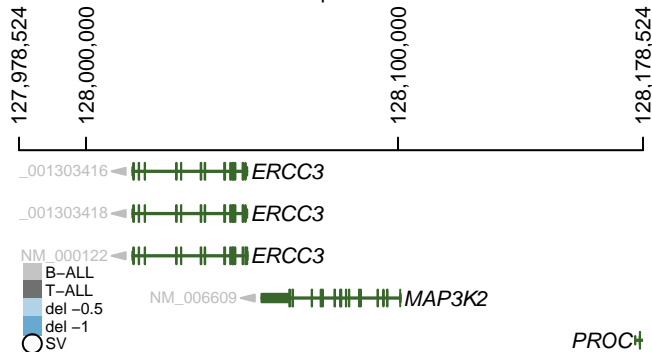

### MCM9 focal deletions

chr 6 position

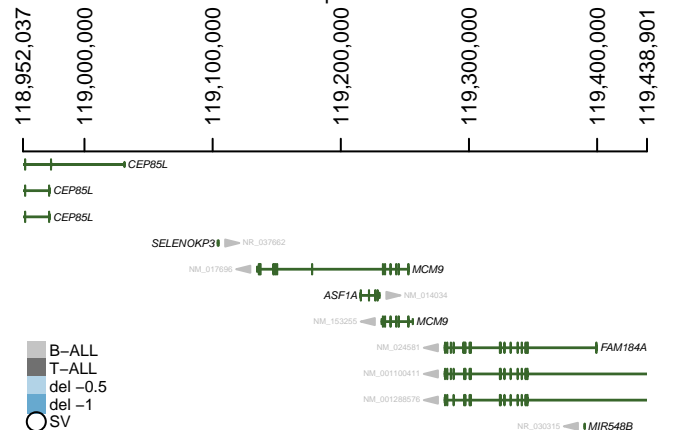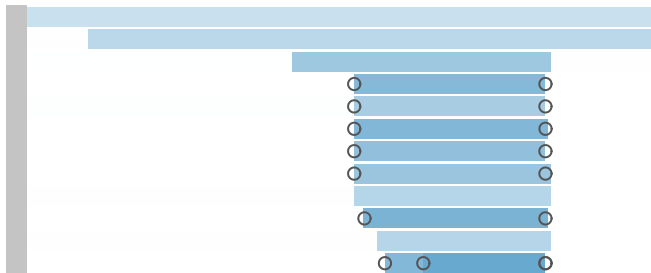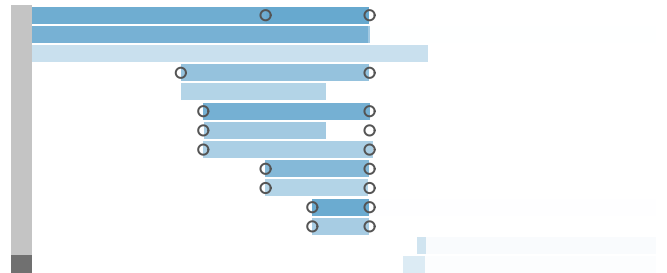



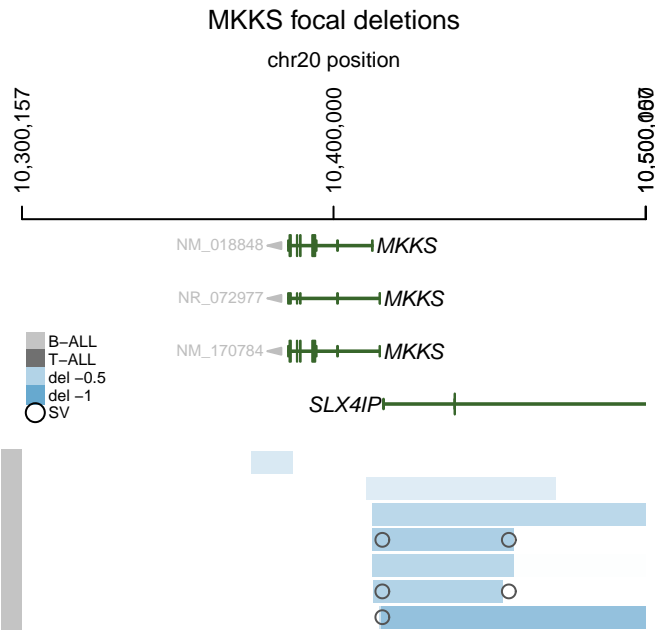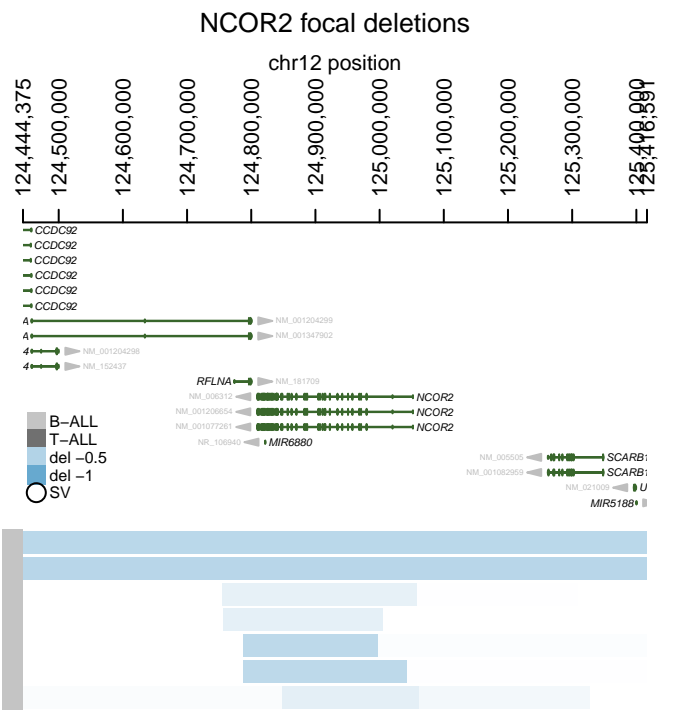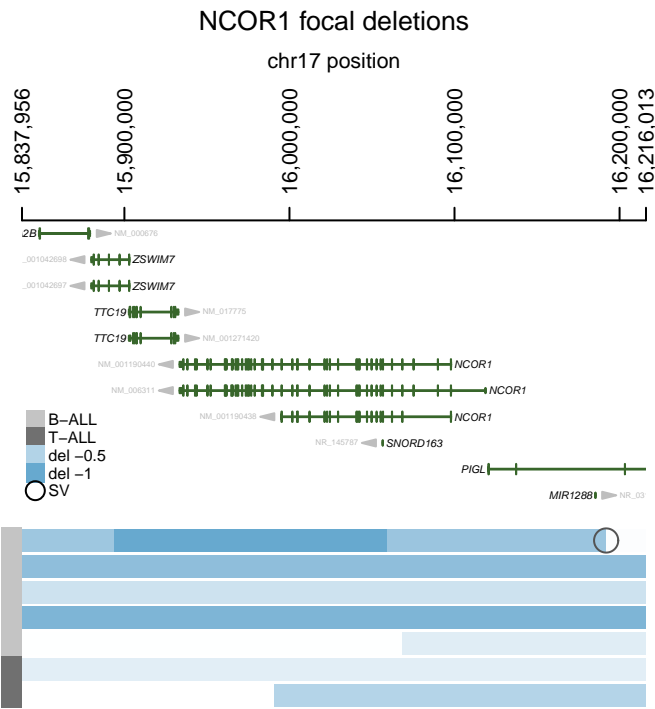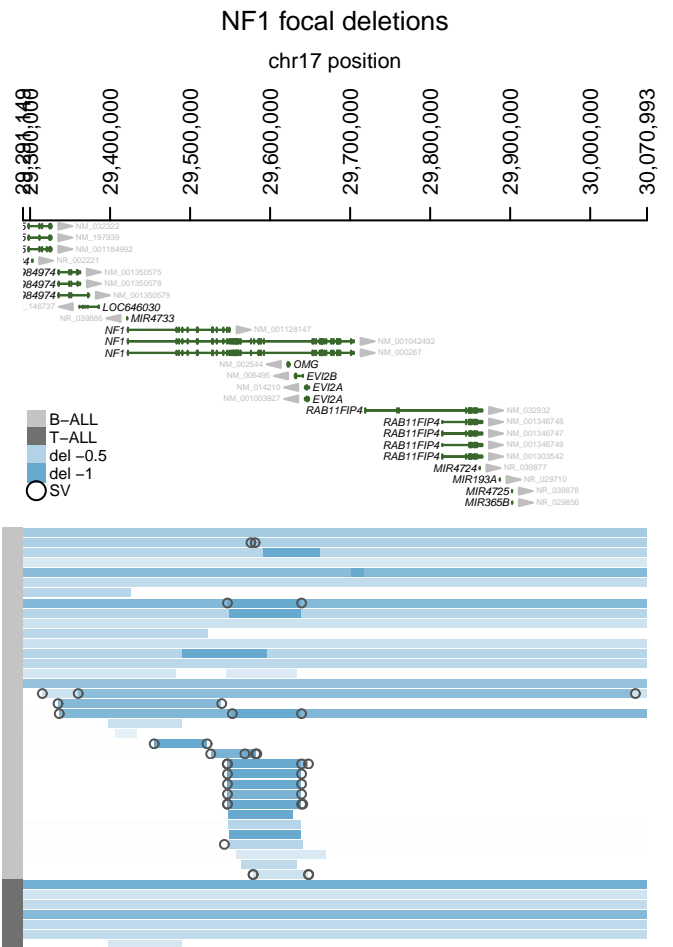

### NIPBL focal deletions

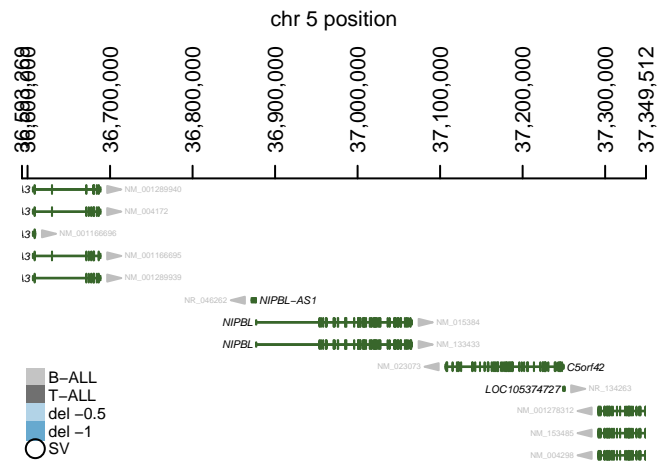

### NR3C2 focal deletions

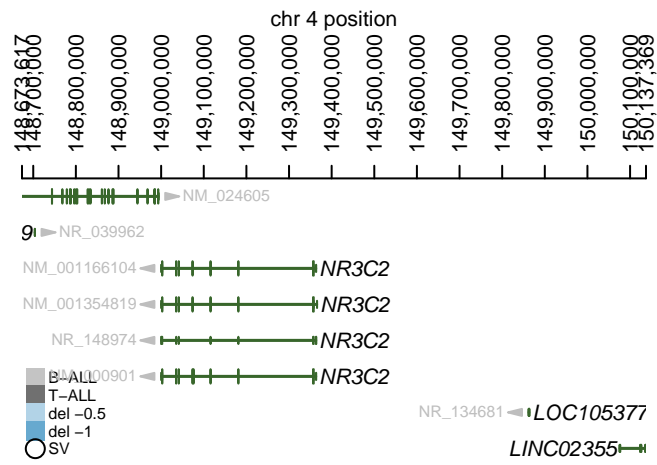

### NR3C1 focal deletions

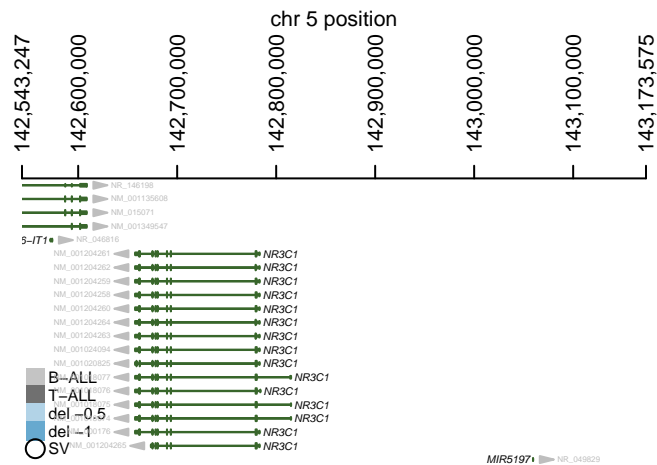

### ORAI1 focal deletions

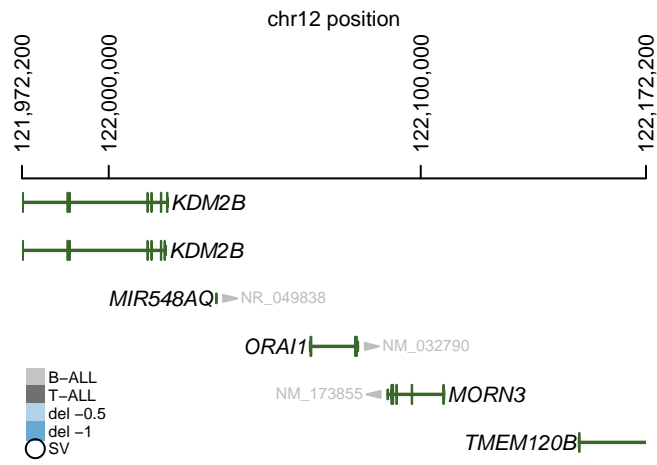





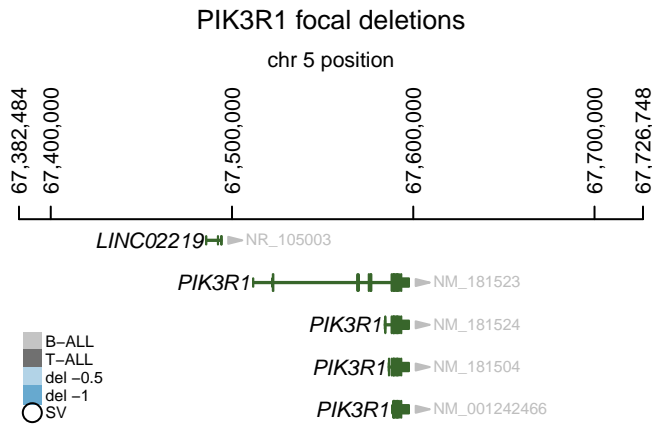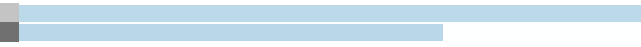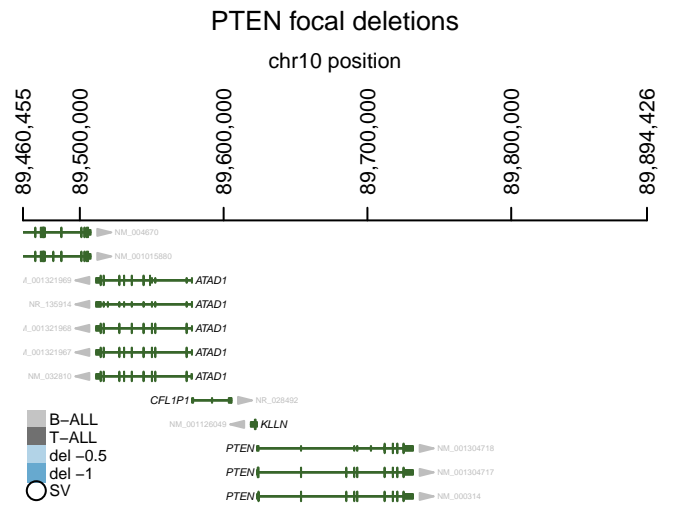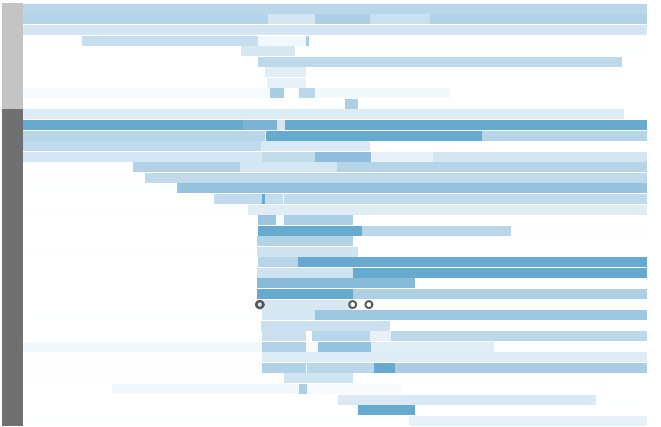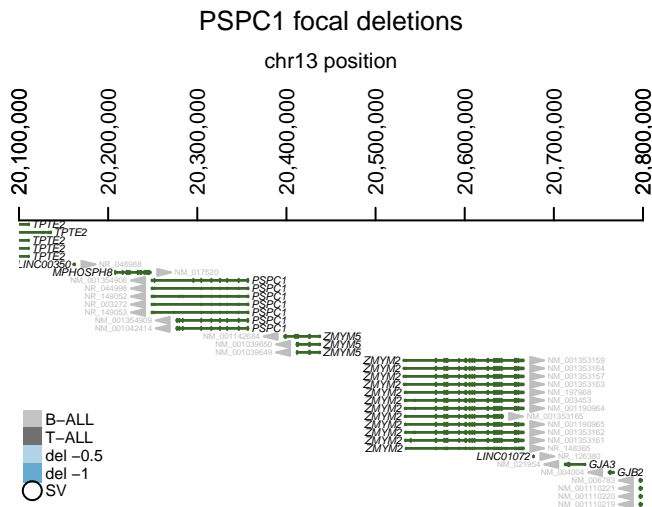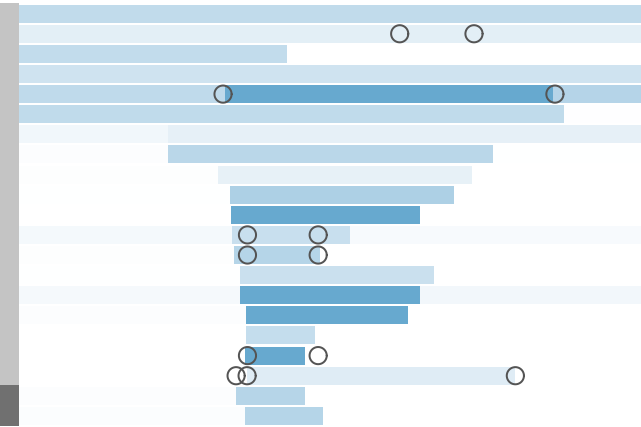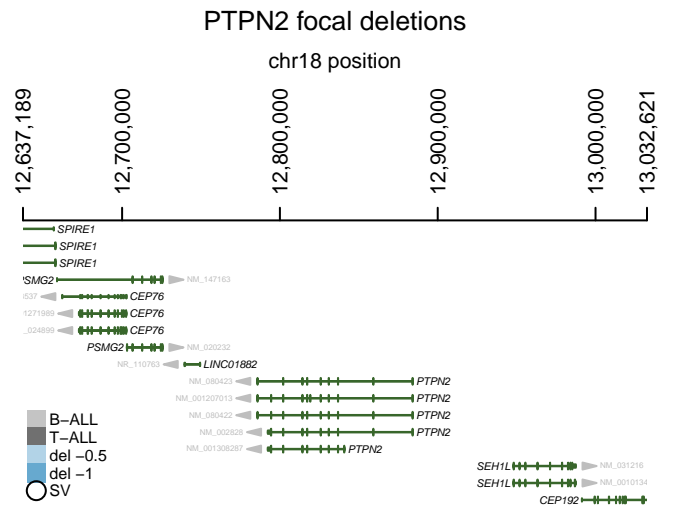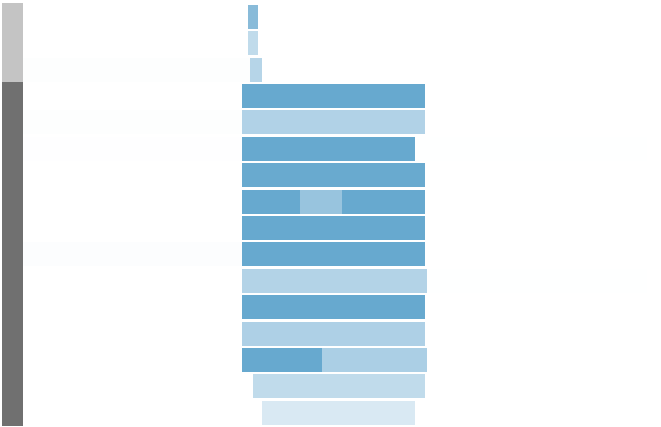







### RPL5 focal deletions

chr 1 position

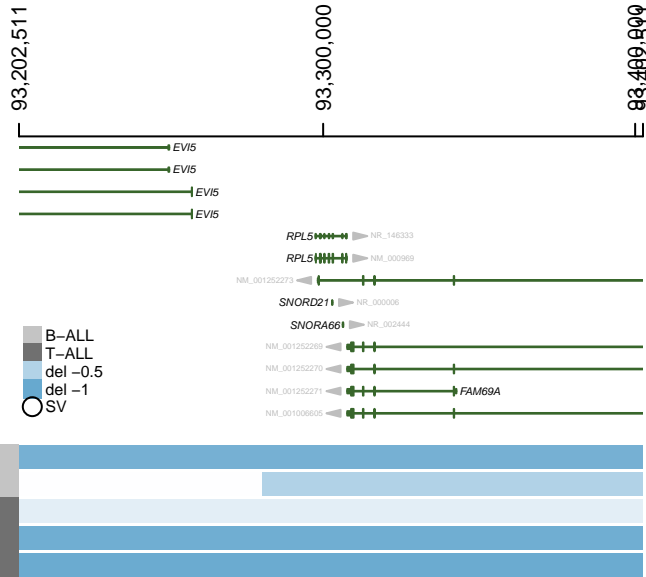

### SAE1 focal deletions

chr19 position

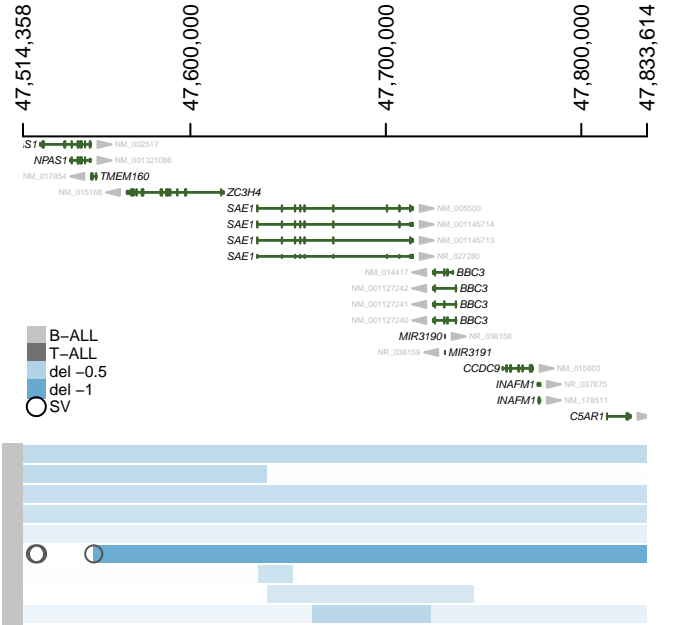

### RUNX1 focal deletions

chr21 position

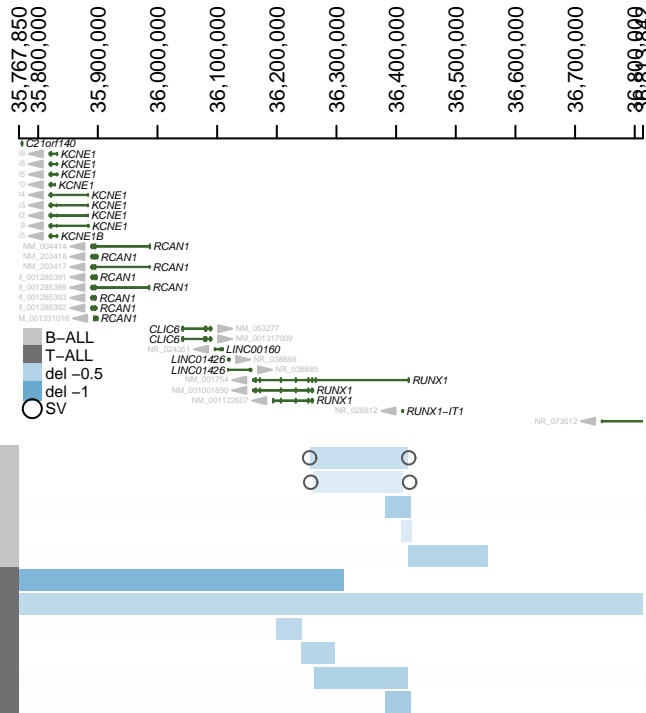

### SEN1 focal deletions

chr12 position

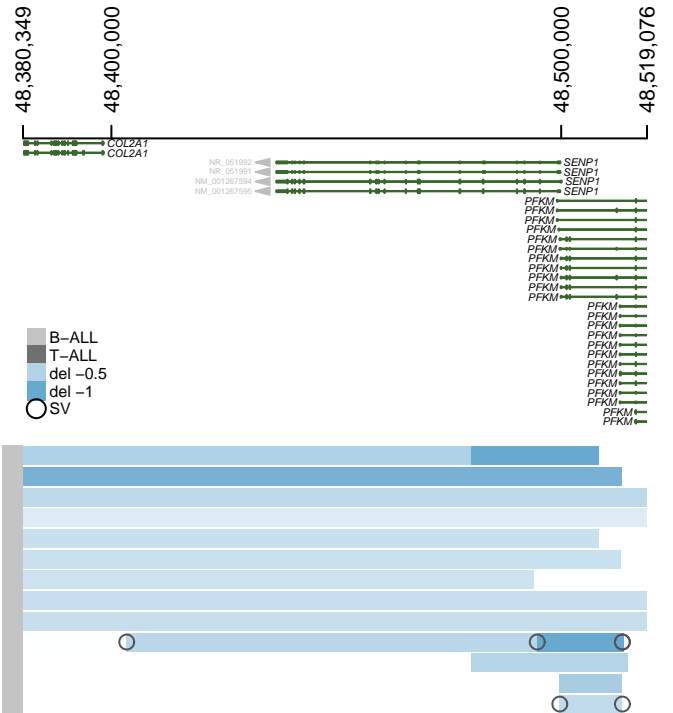

### SERP2 focal deletions

chr13 position

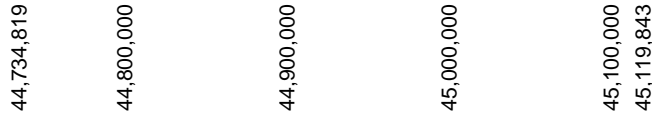

B-ALL  
T-ALL  
del -0.5  
del -1  
SV

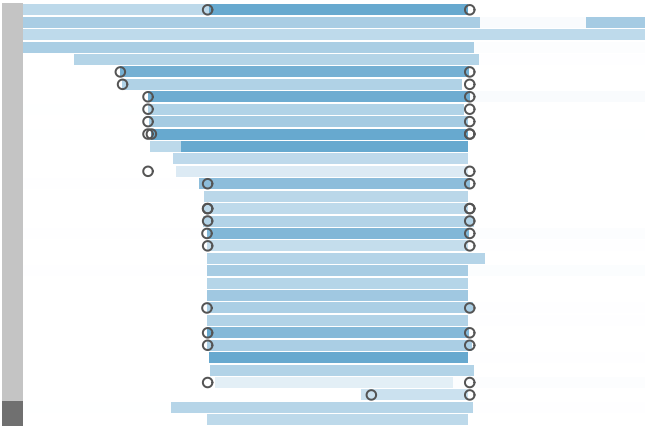

### SETD1B focal deletions

chr12 position

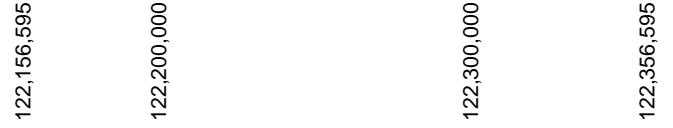

B-ALL  
T-ALL  
del -0.5  
del -1  
SV

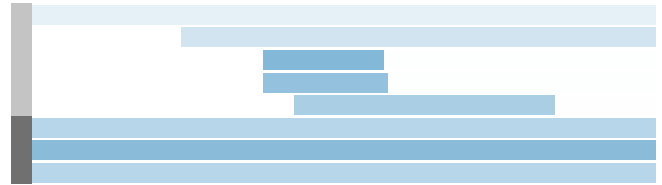

### SESN1 focal deletions

chr 6 position

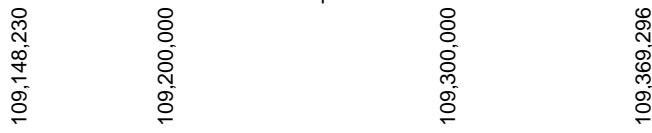

B-ALL  
T-ALL  
del -0.5  
del -1  
SV

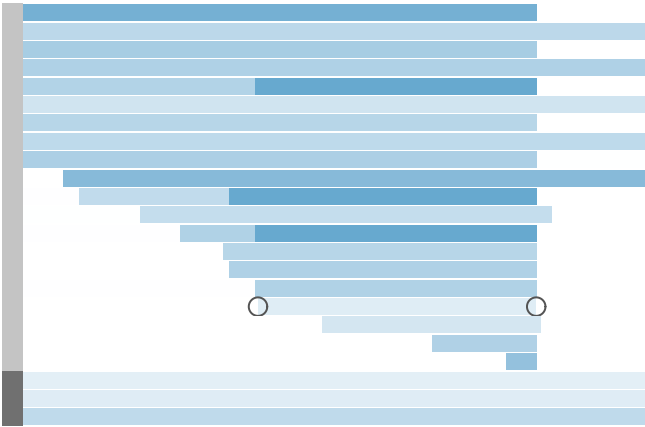

### SETD2 focal deletions

chr 3 position

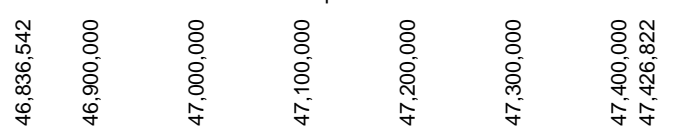

B-ALL  
T-ALL  
del -0.5  
del -1  
SV

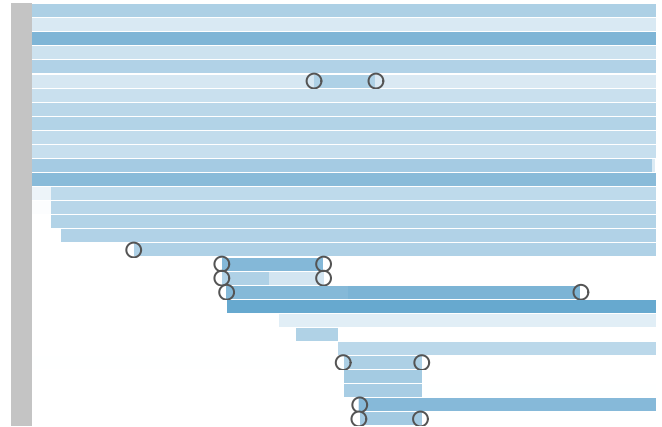

### SH2B3 focal deletions

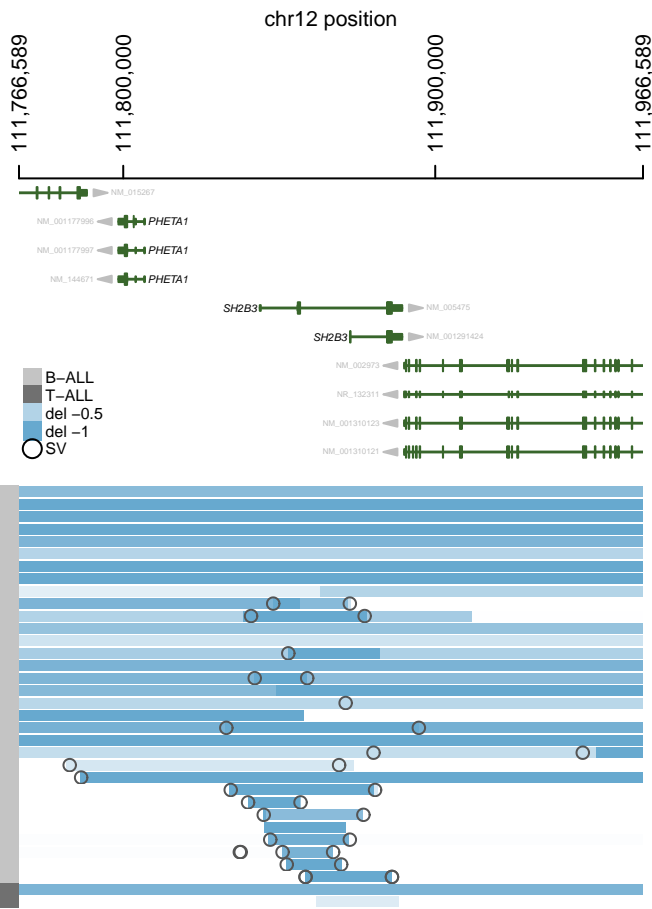

### SMARCA4 focal deletions

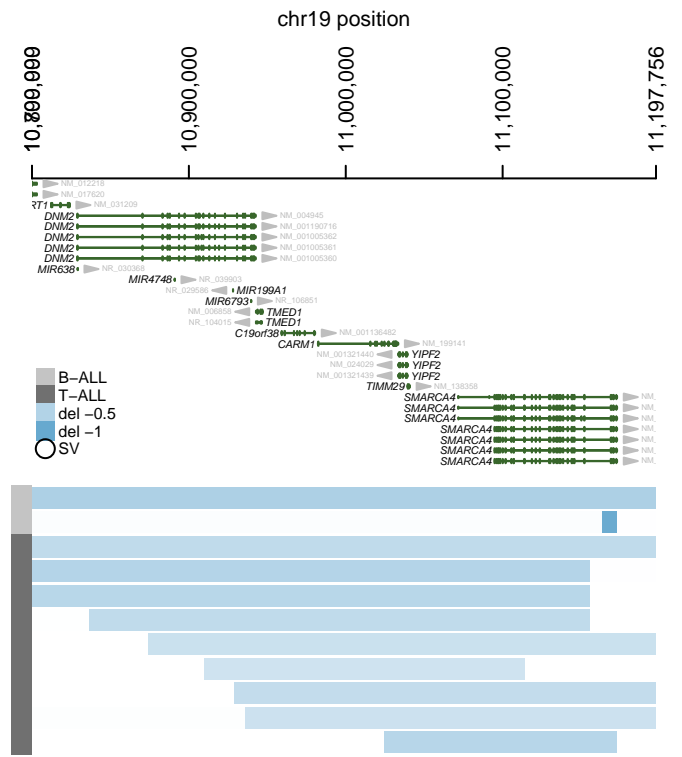

### SLX4IP focal deletions

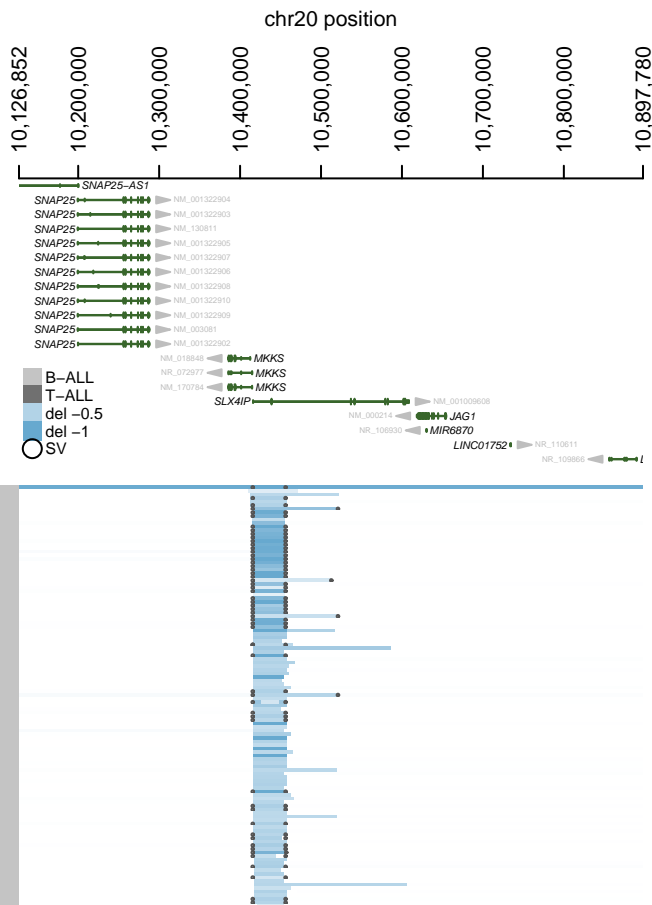

### SNRNP70 focal deletions

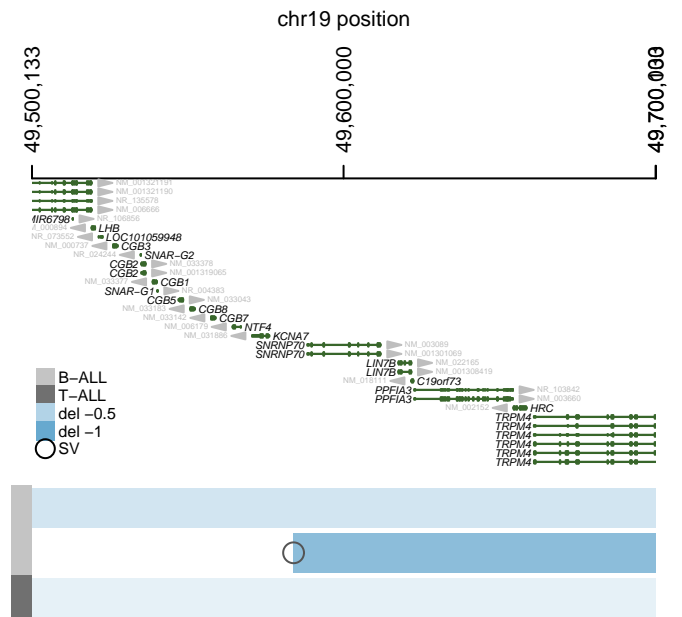

### SPI1 focal deletions

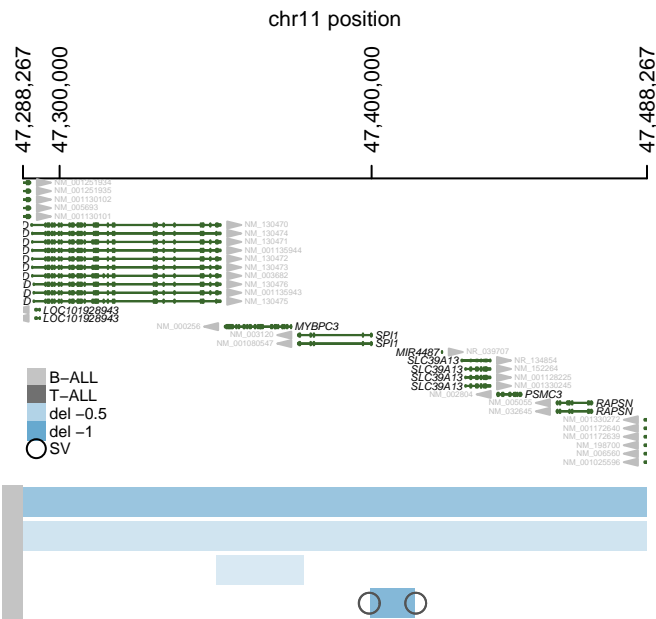

### STAG2 focal deletions

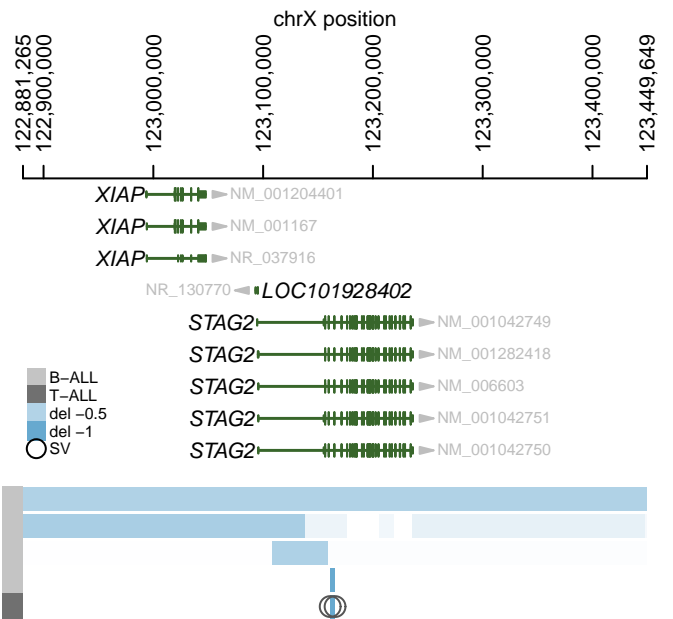

### SRSF3 focal deletions

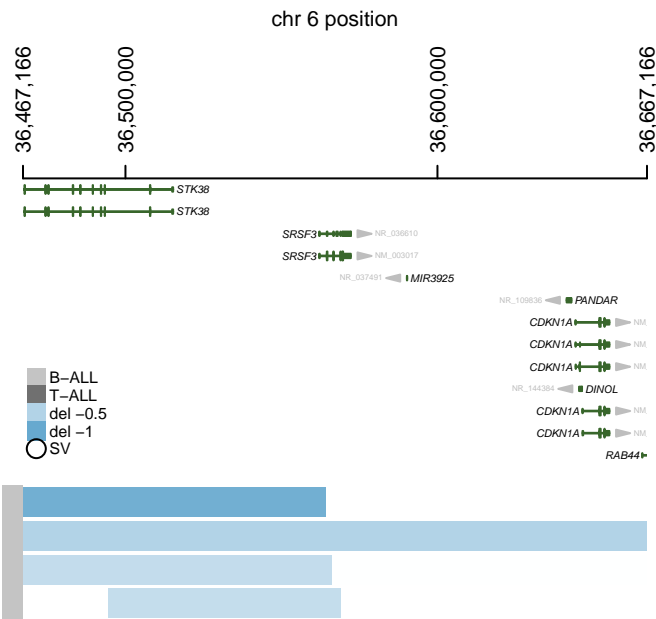

### SUZ12 focal deletions

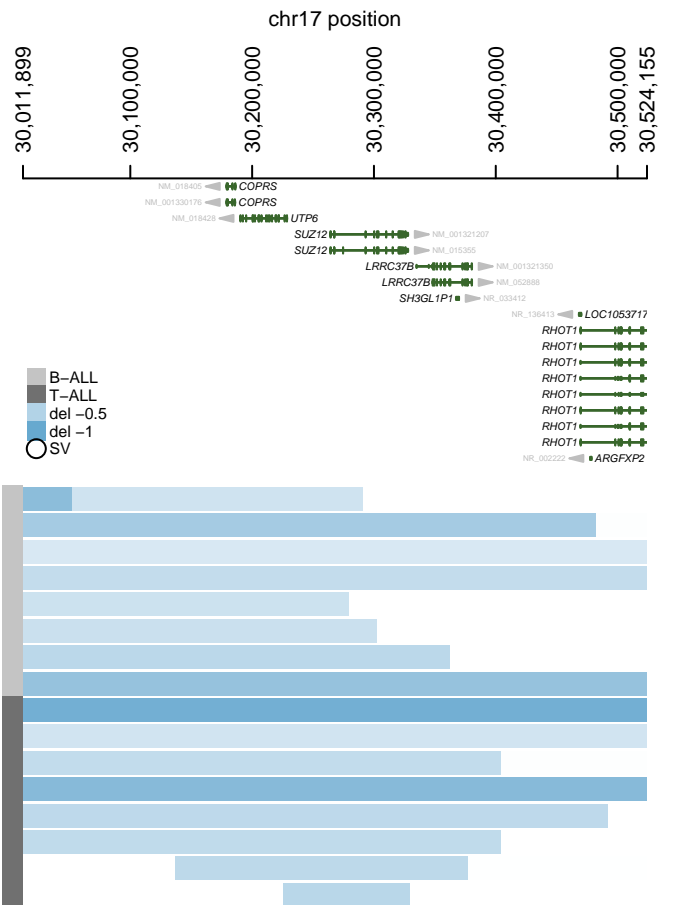









### UBE2I focal deletions

chr16 position

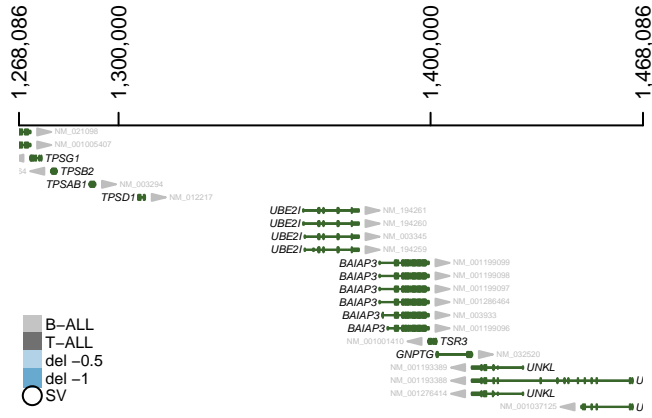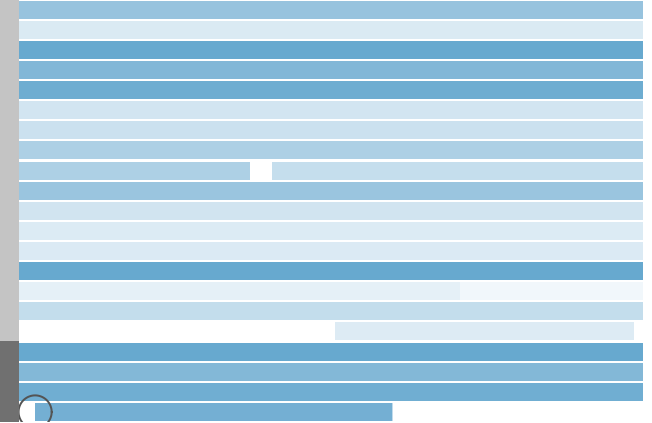

### USP7 focal deletions

chr16 position

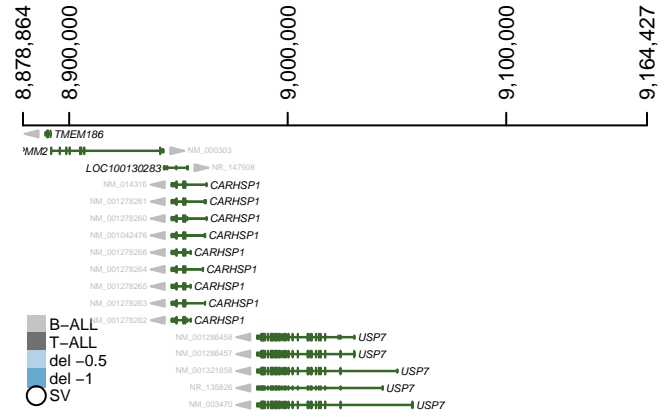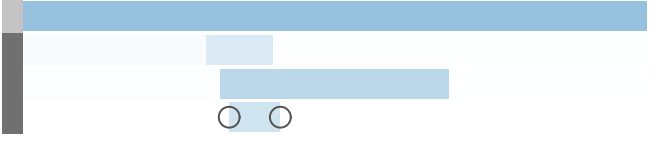

### UHRF1 focal deletions

chr19 position

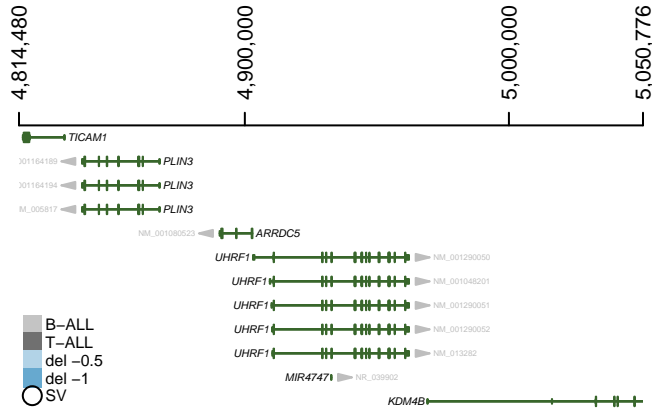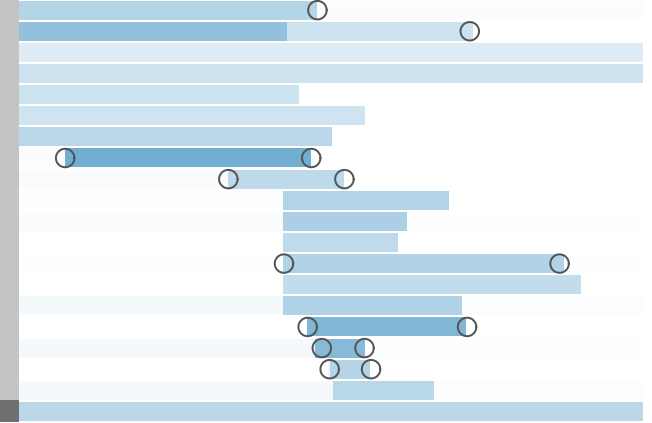

### USP9X focal deletions

chrX position

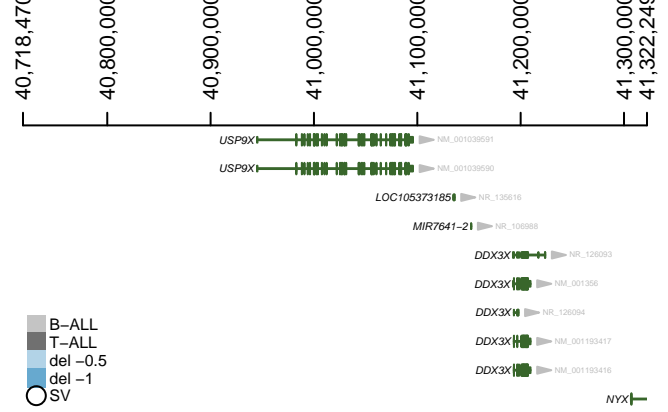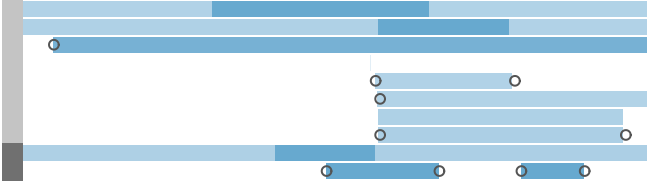

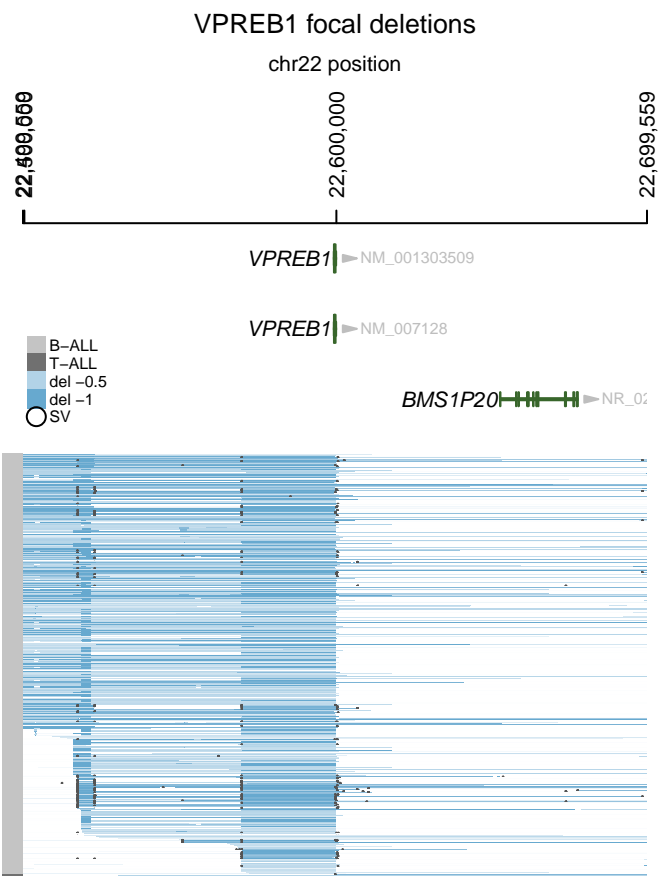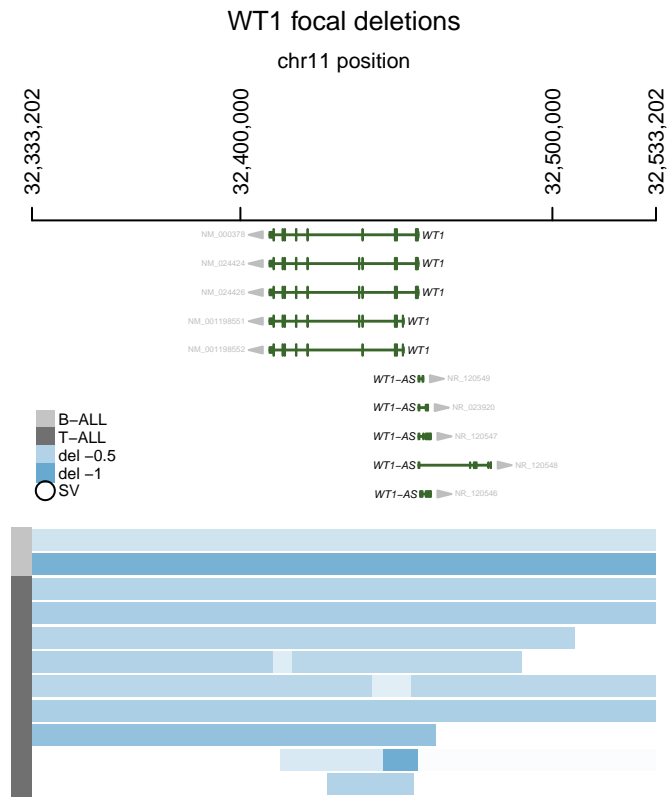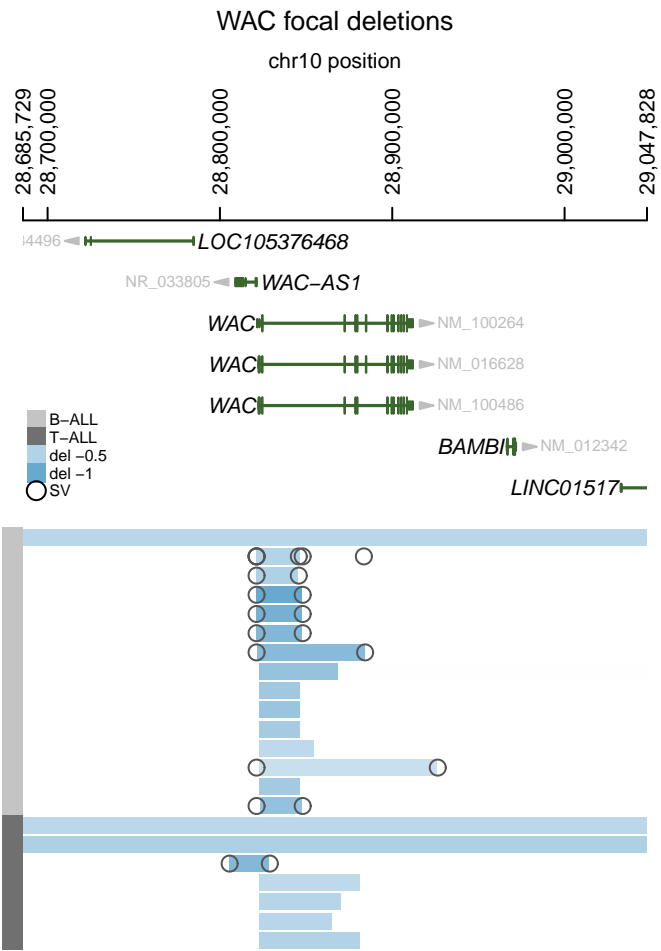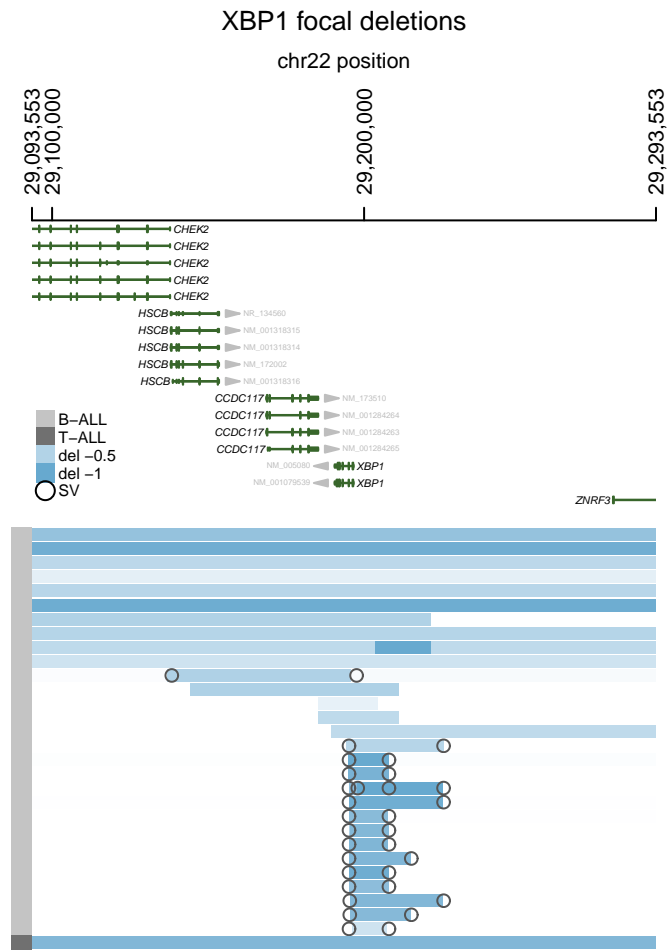

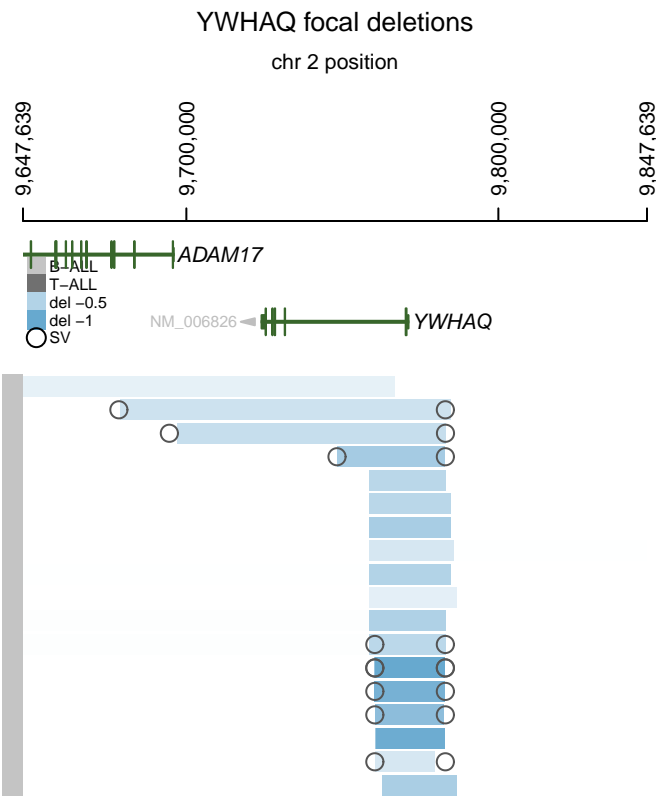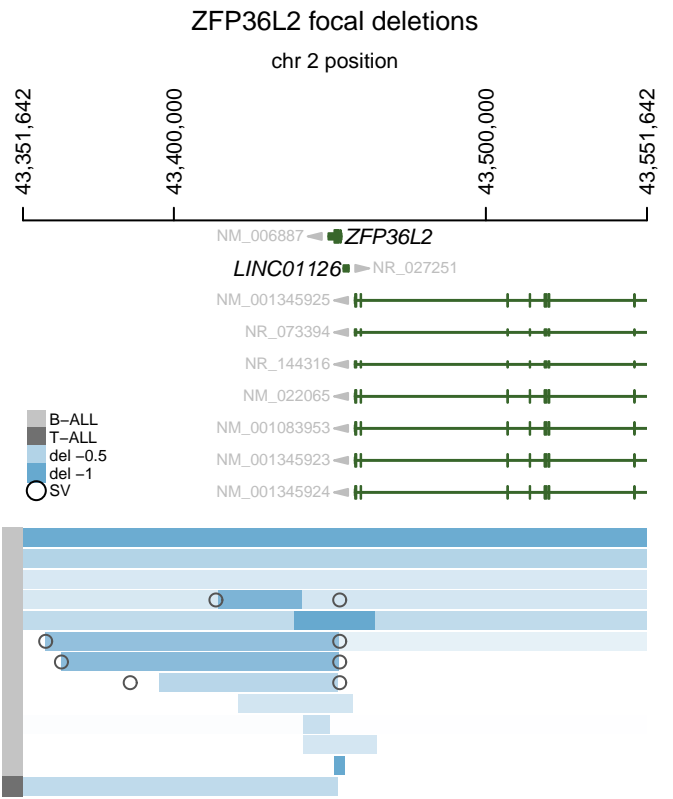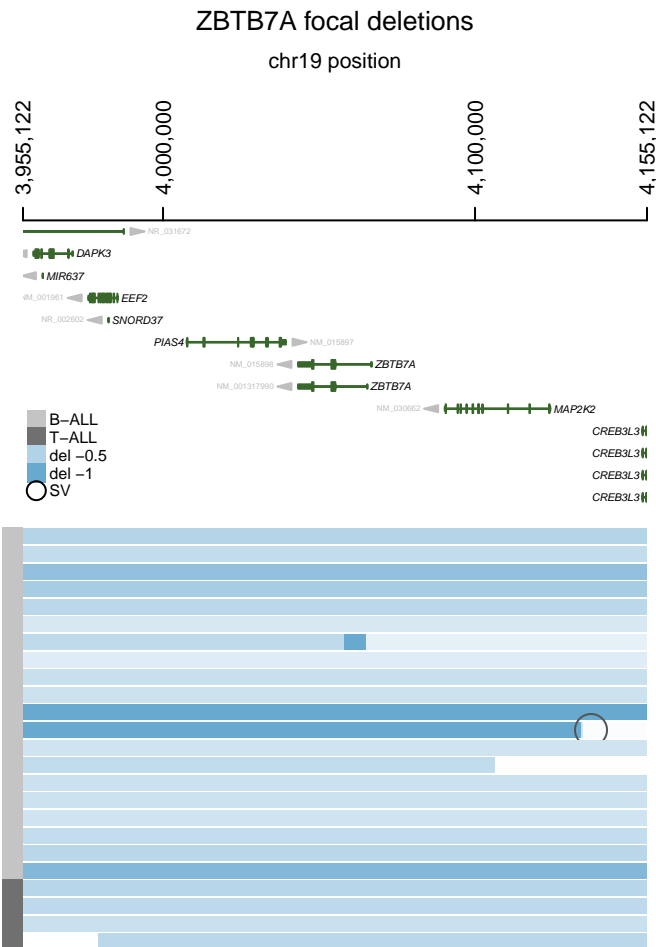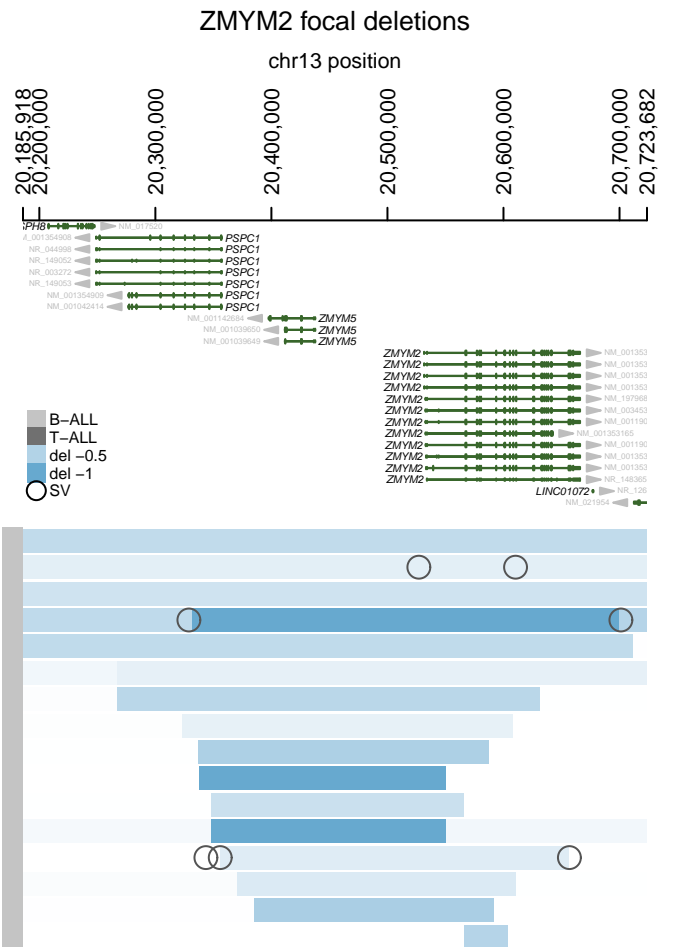

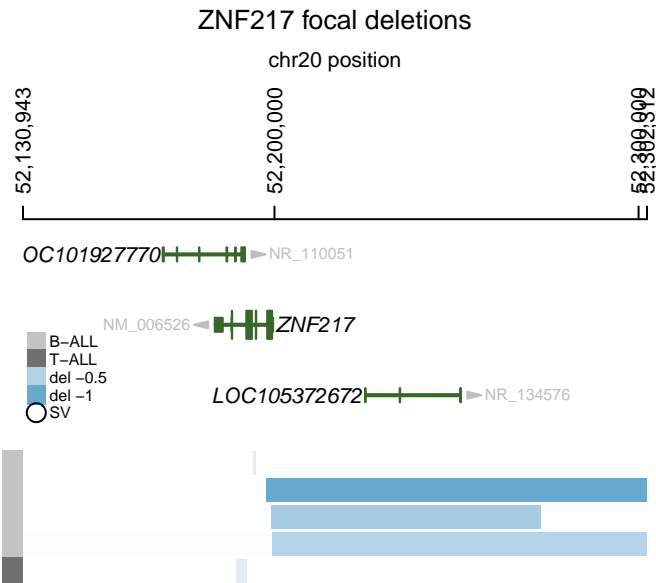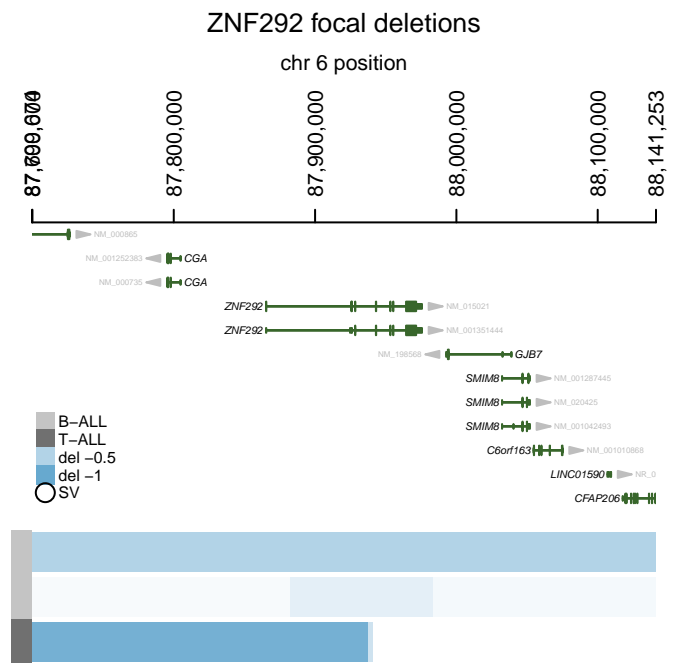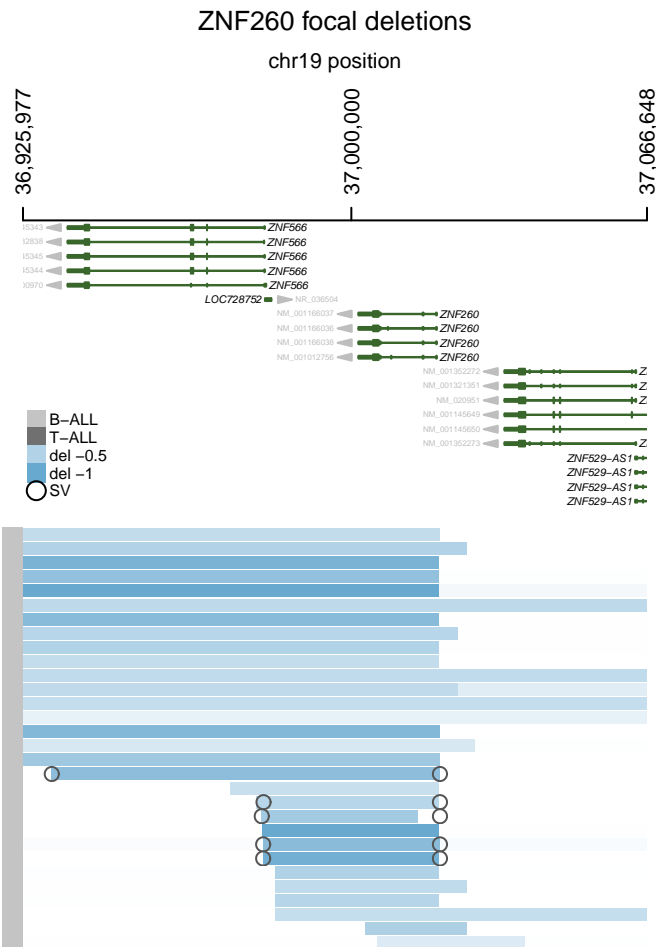

Supplement: NIHMS1848401-supplement-1848401_Sup_Dataset_2.pdf [file NIHMS1848401-supplement-1848401_Sup_Dataset_2.pdf]
