# Supplementary material
Source: PubMed Central journal article supplement (PMC9700506)

# Supplementary Dataset 4

B-other (n=145) B-ALL

Oncoprints of each ALL subtype

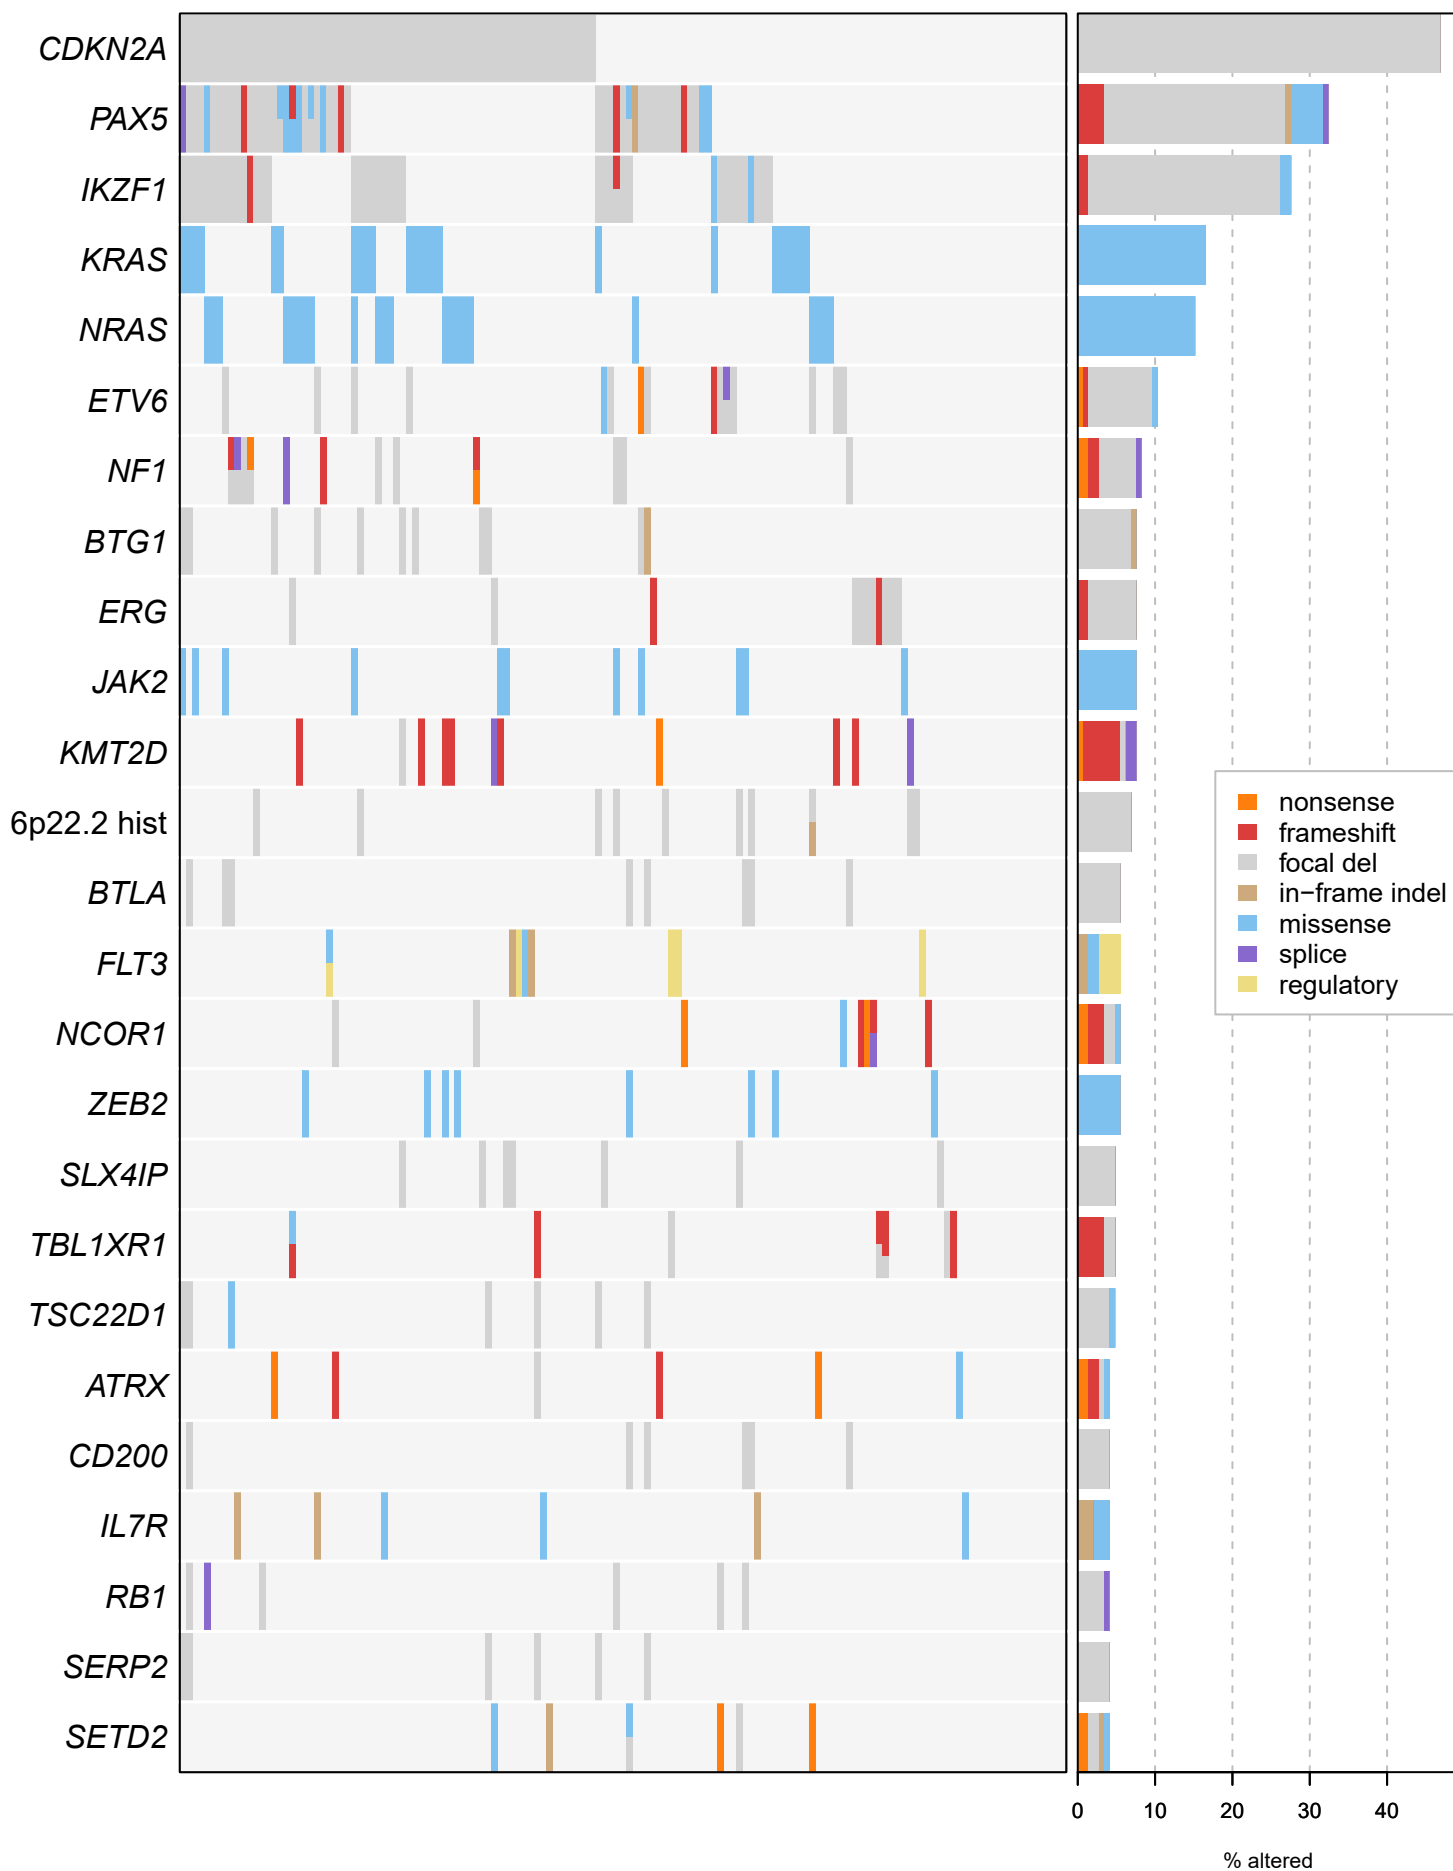

# BCL11B (n=9) T-ALL

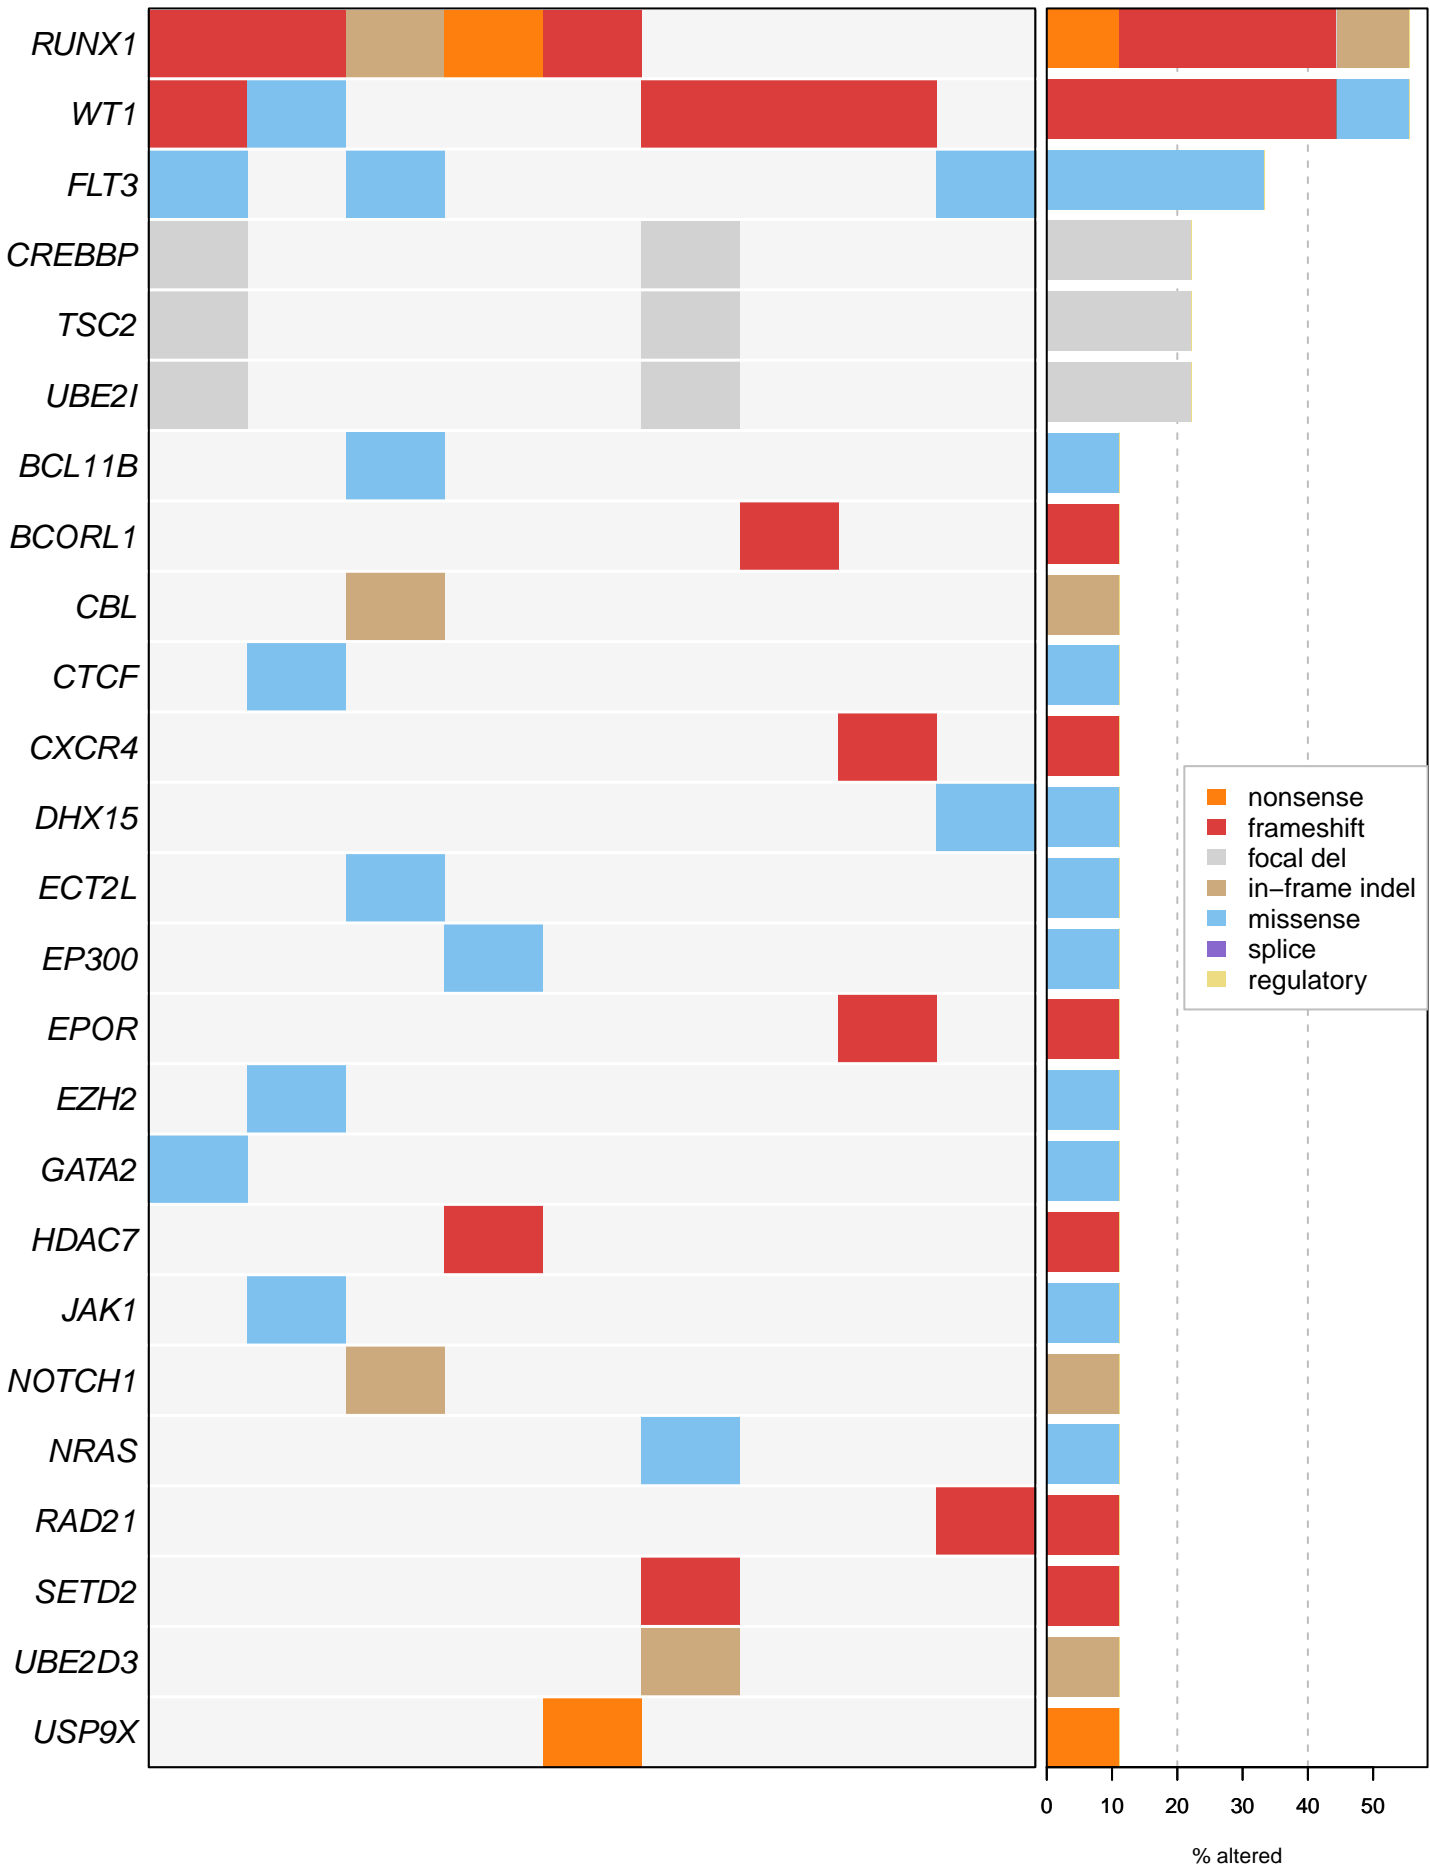

# BCL2/MYC (n=3) B-ALL

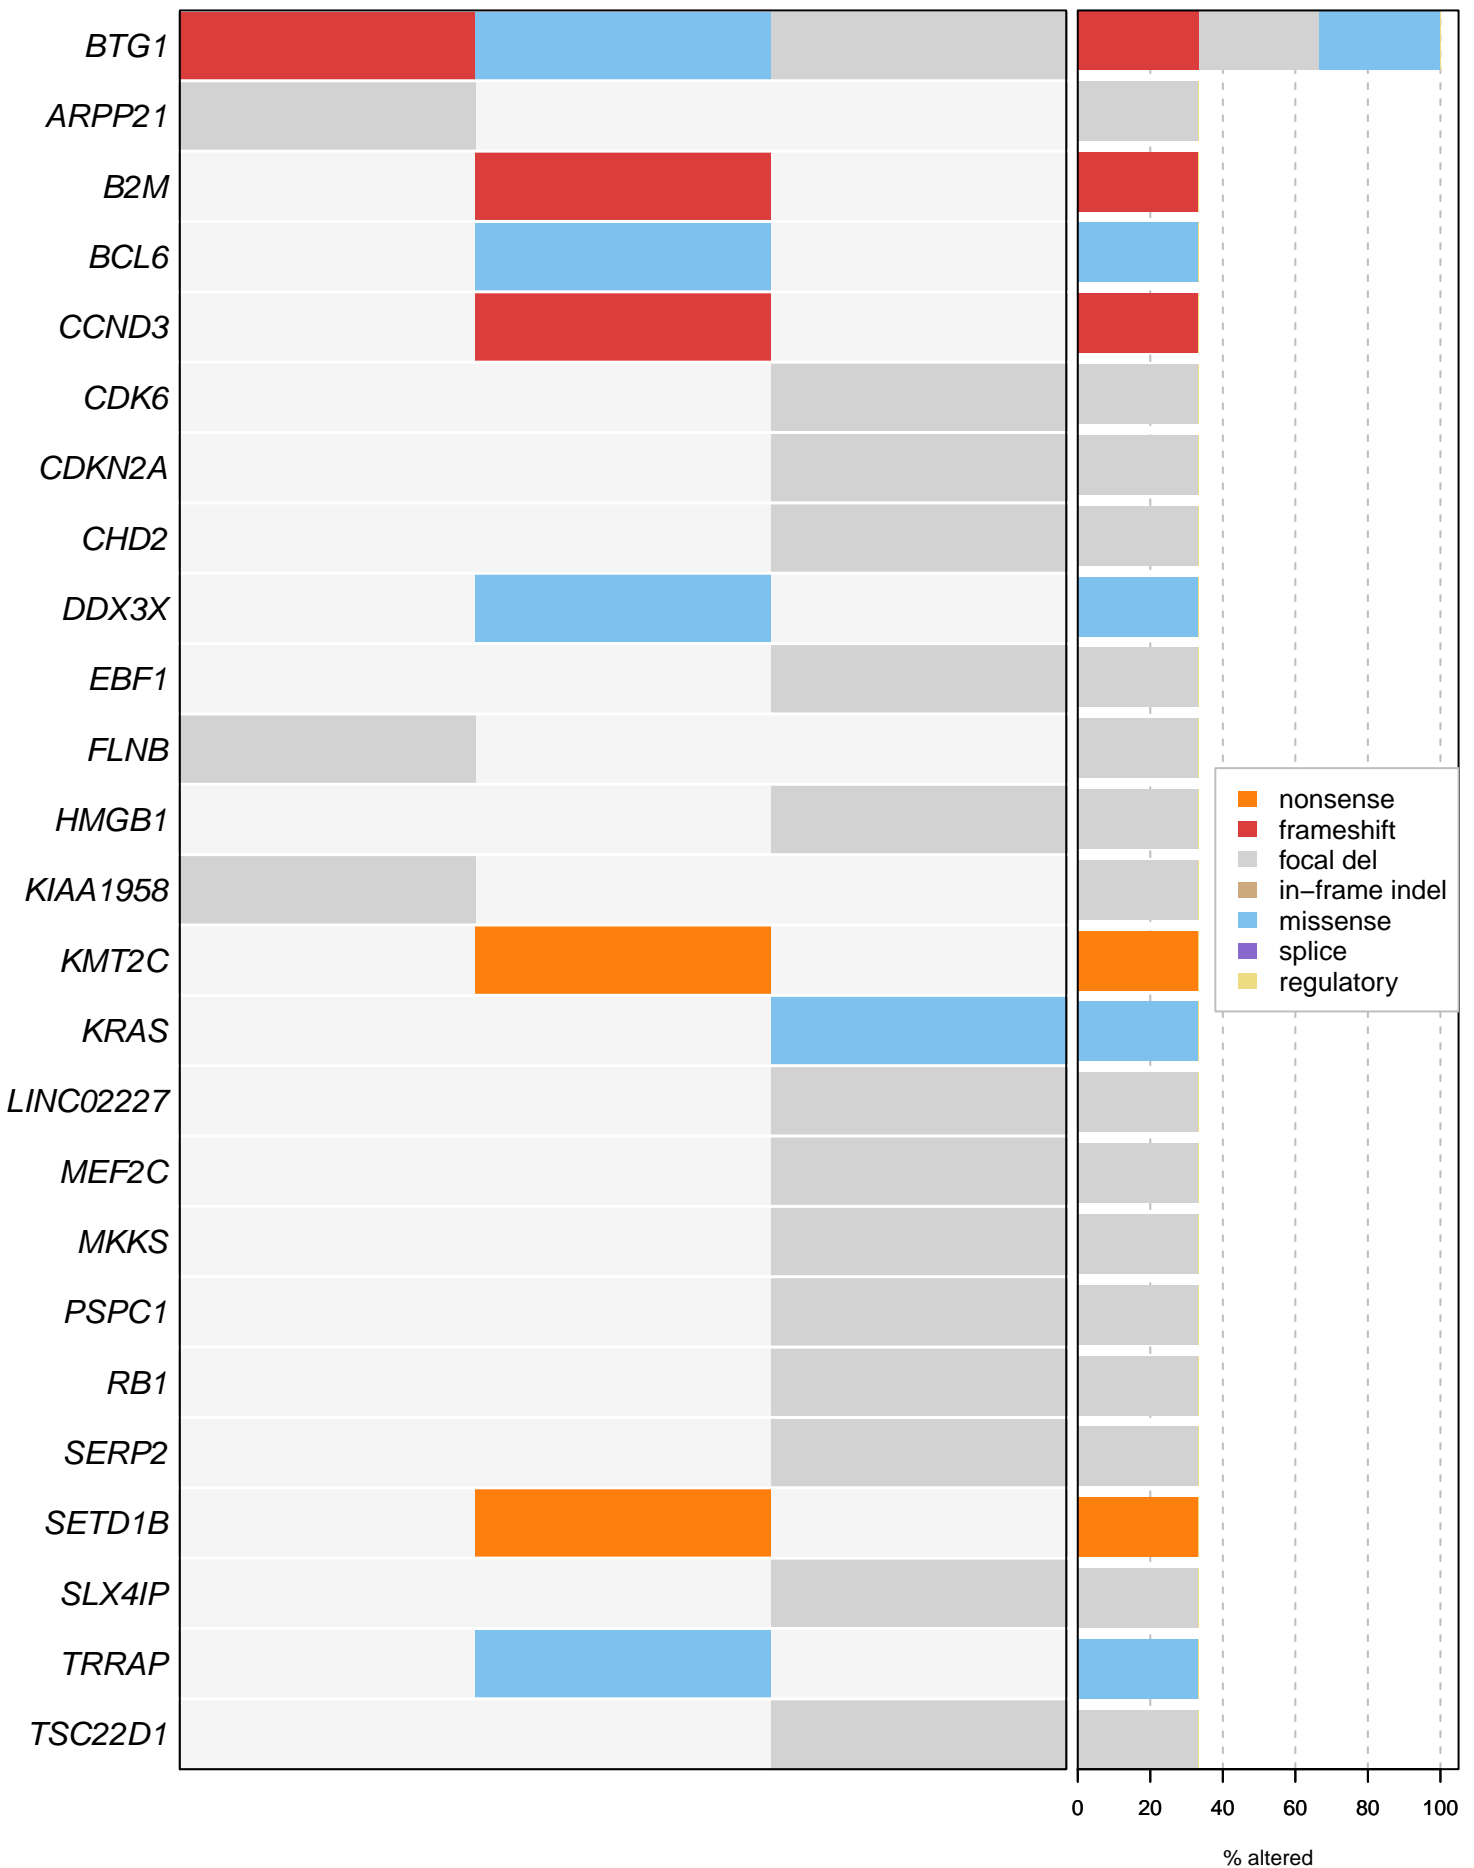

# DUX4 (n=65) B-ALL

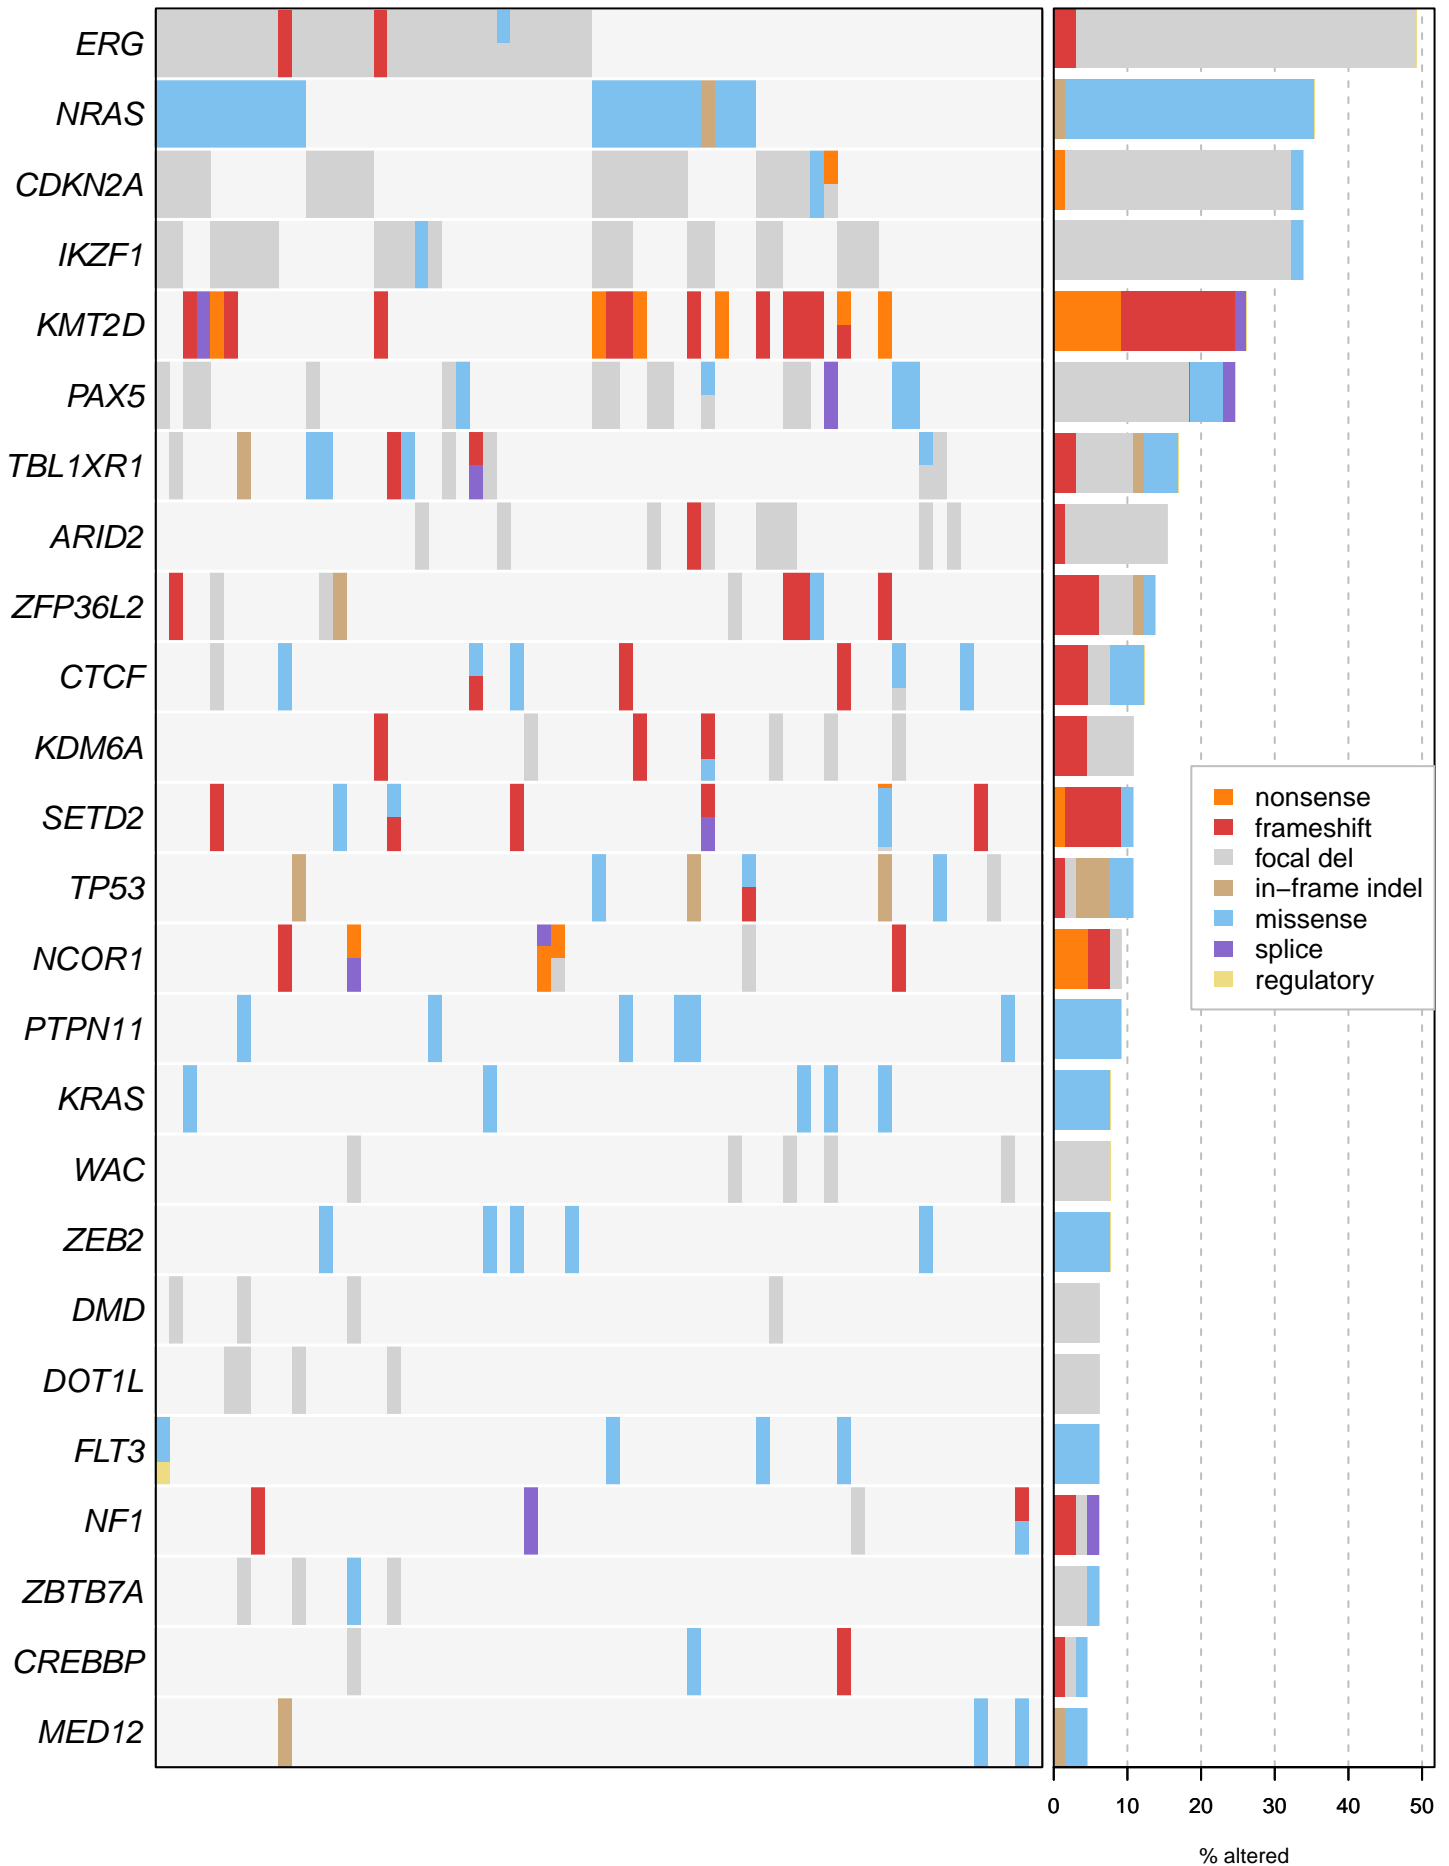

# ETV6-RUNX1-like (n=15) B-ALL

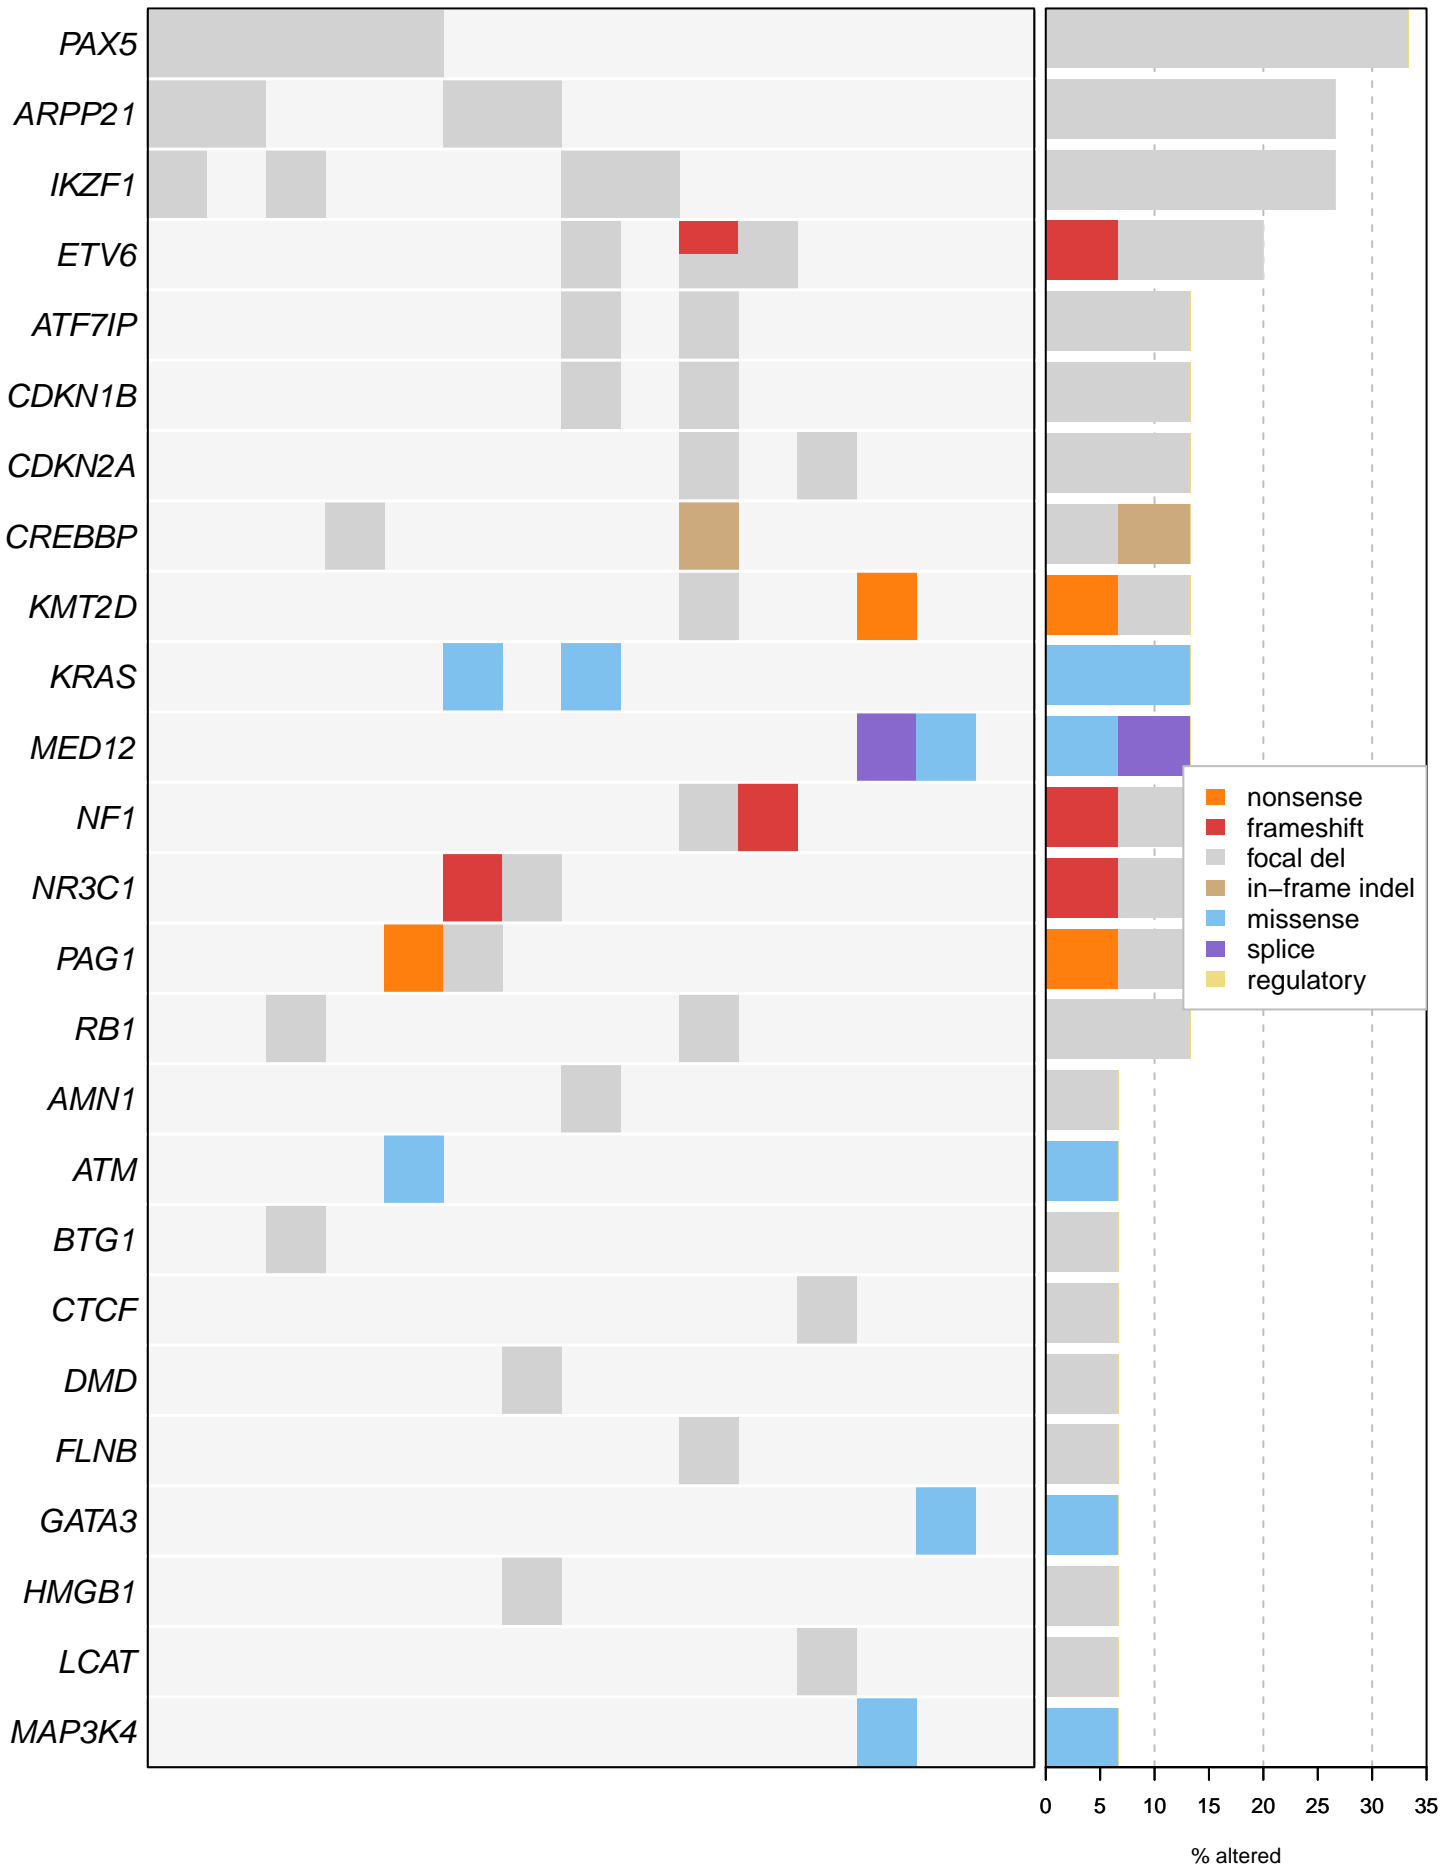

# ETV6-RUNX1 (n=284) B-ALL

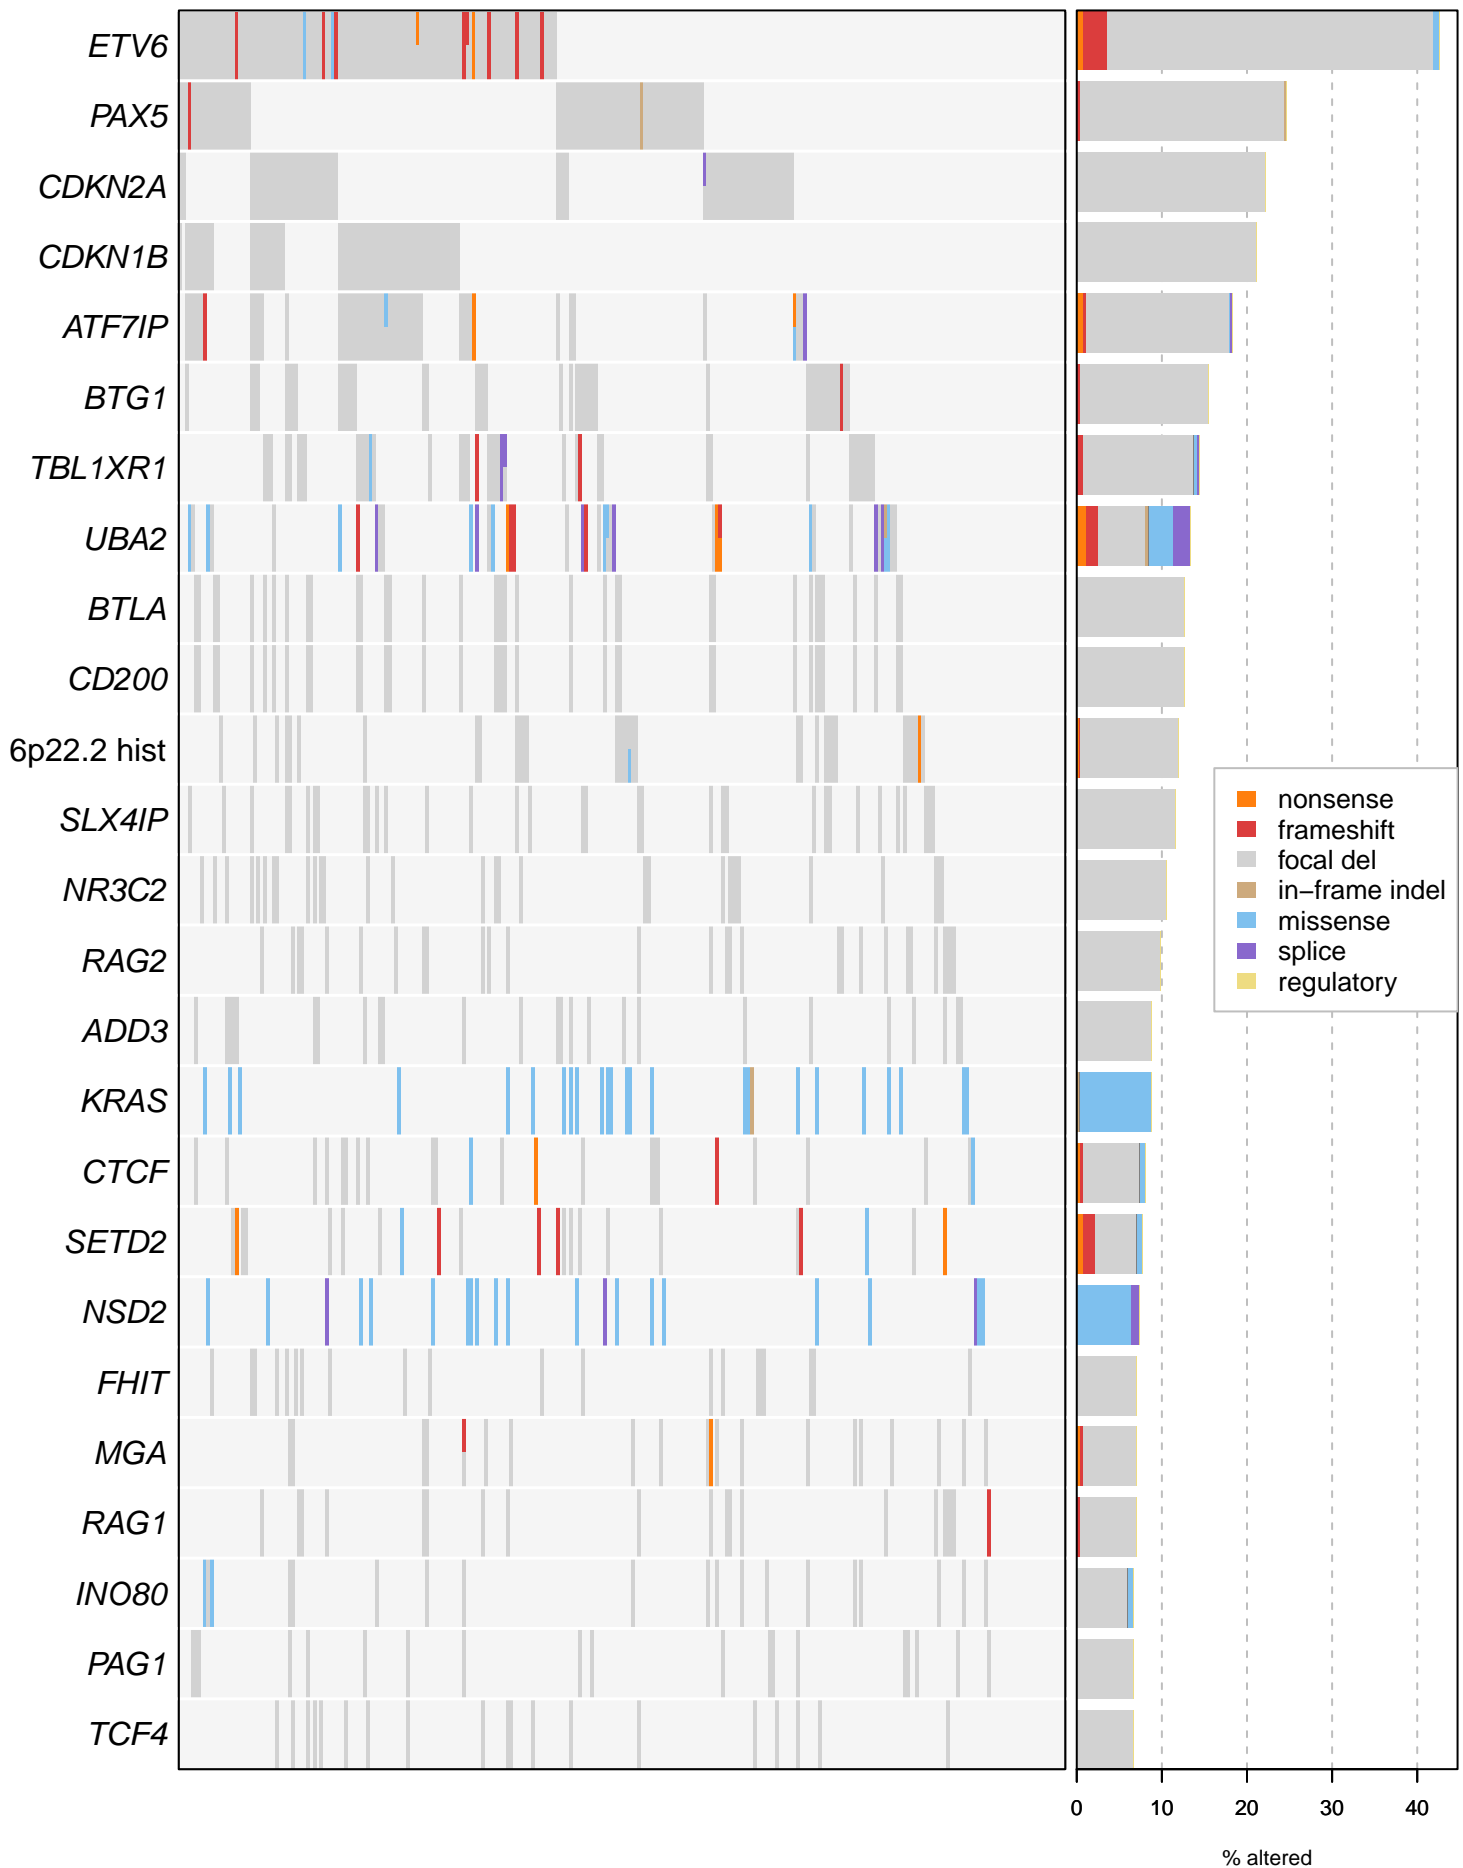

# HLF (n=9) B-ALL

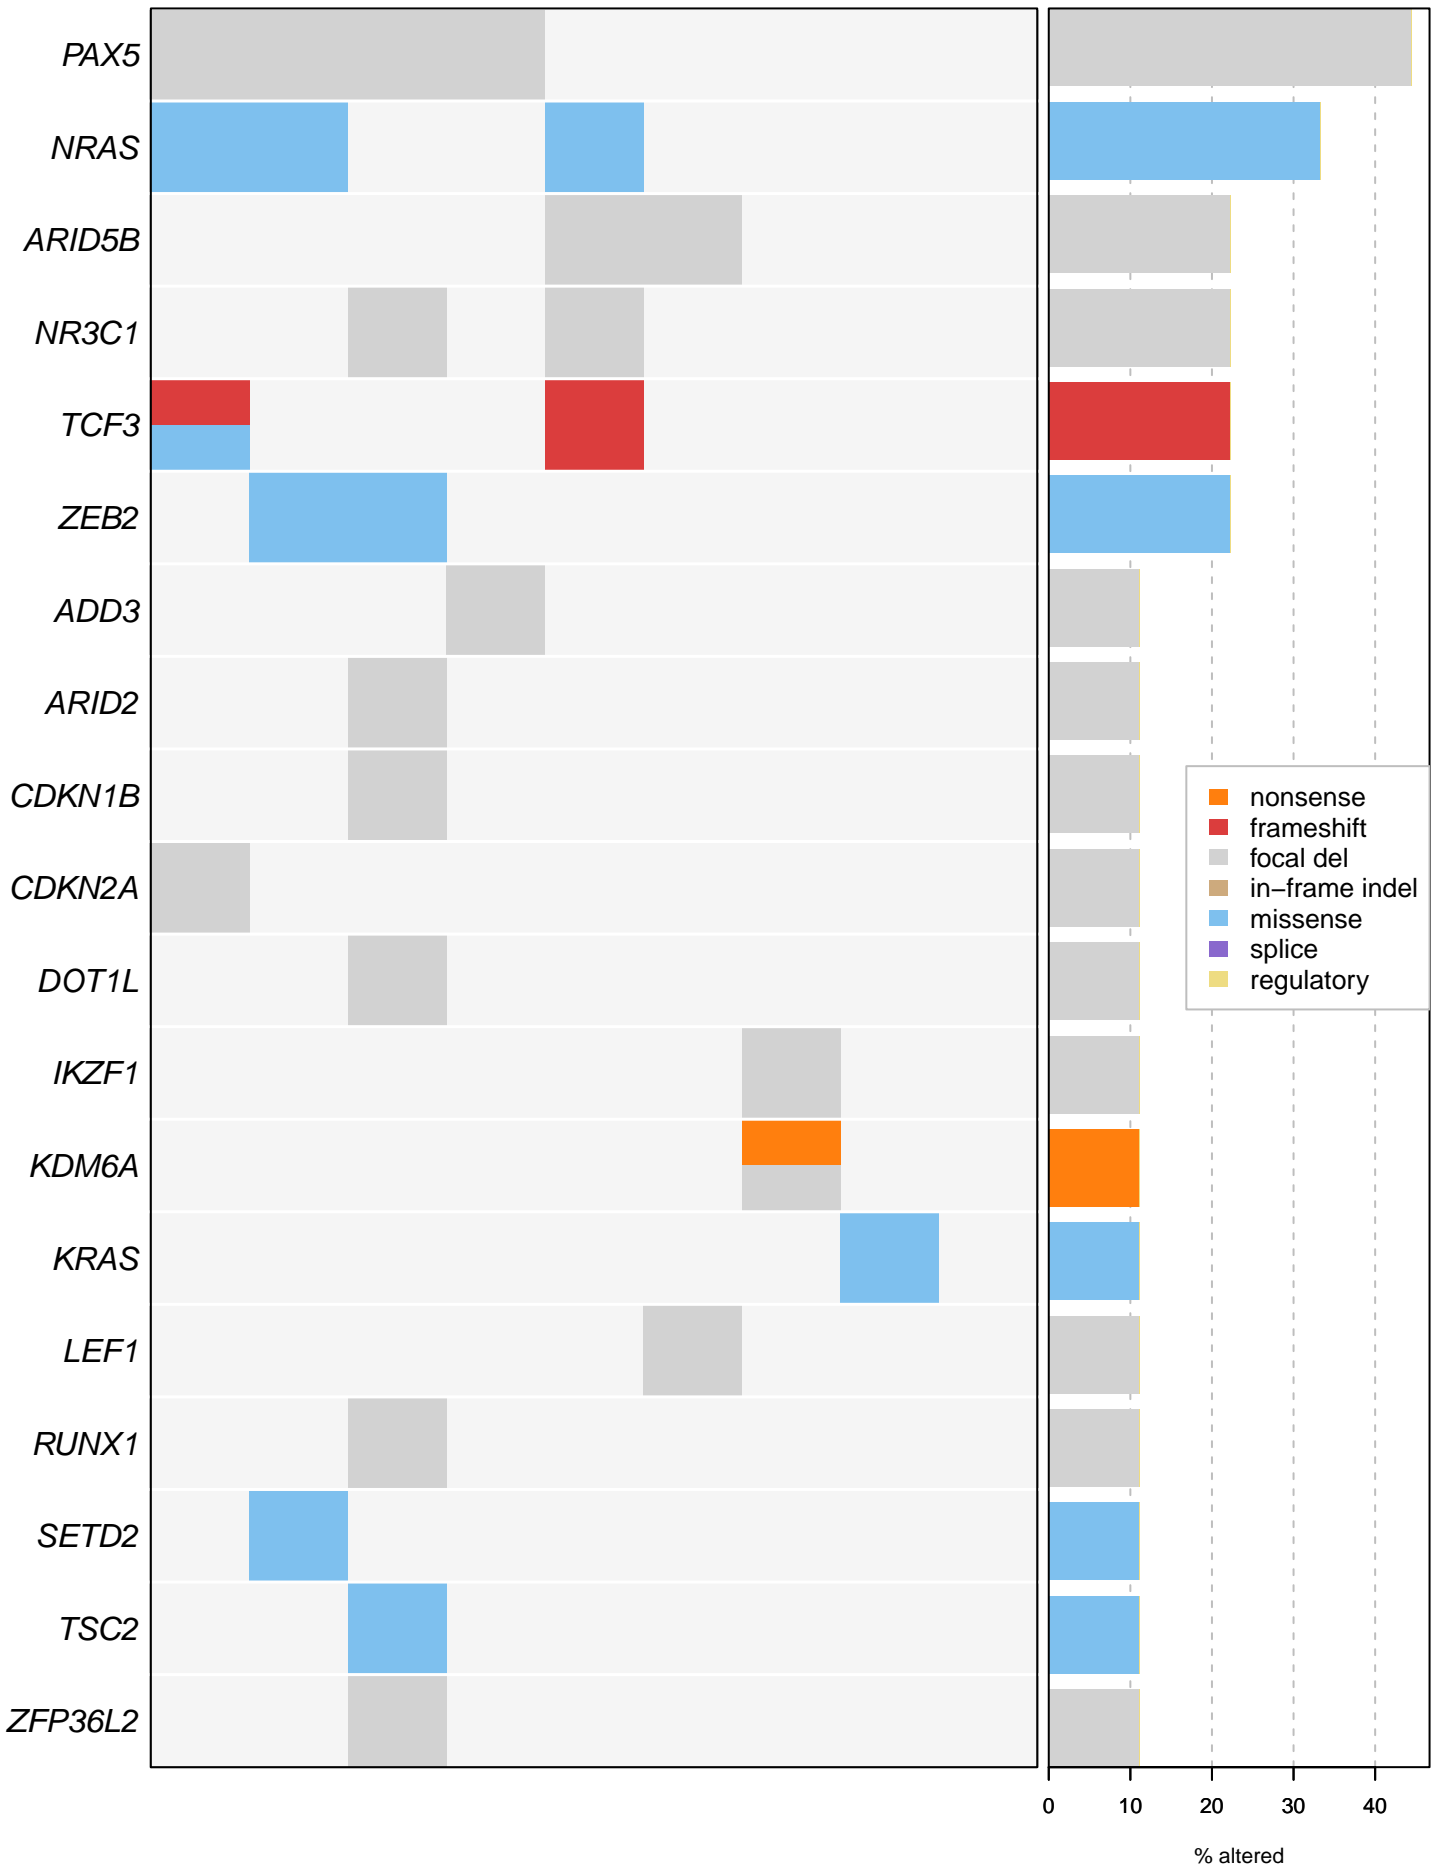

# HOXA (n=65) T-ALL

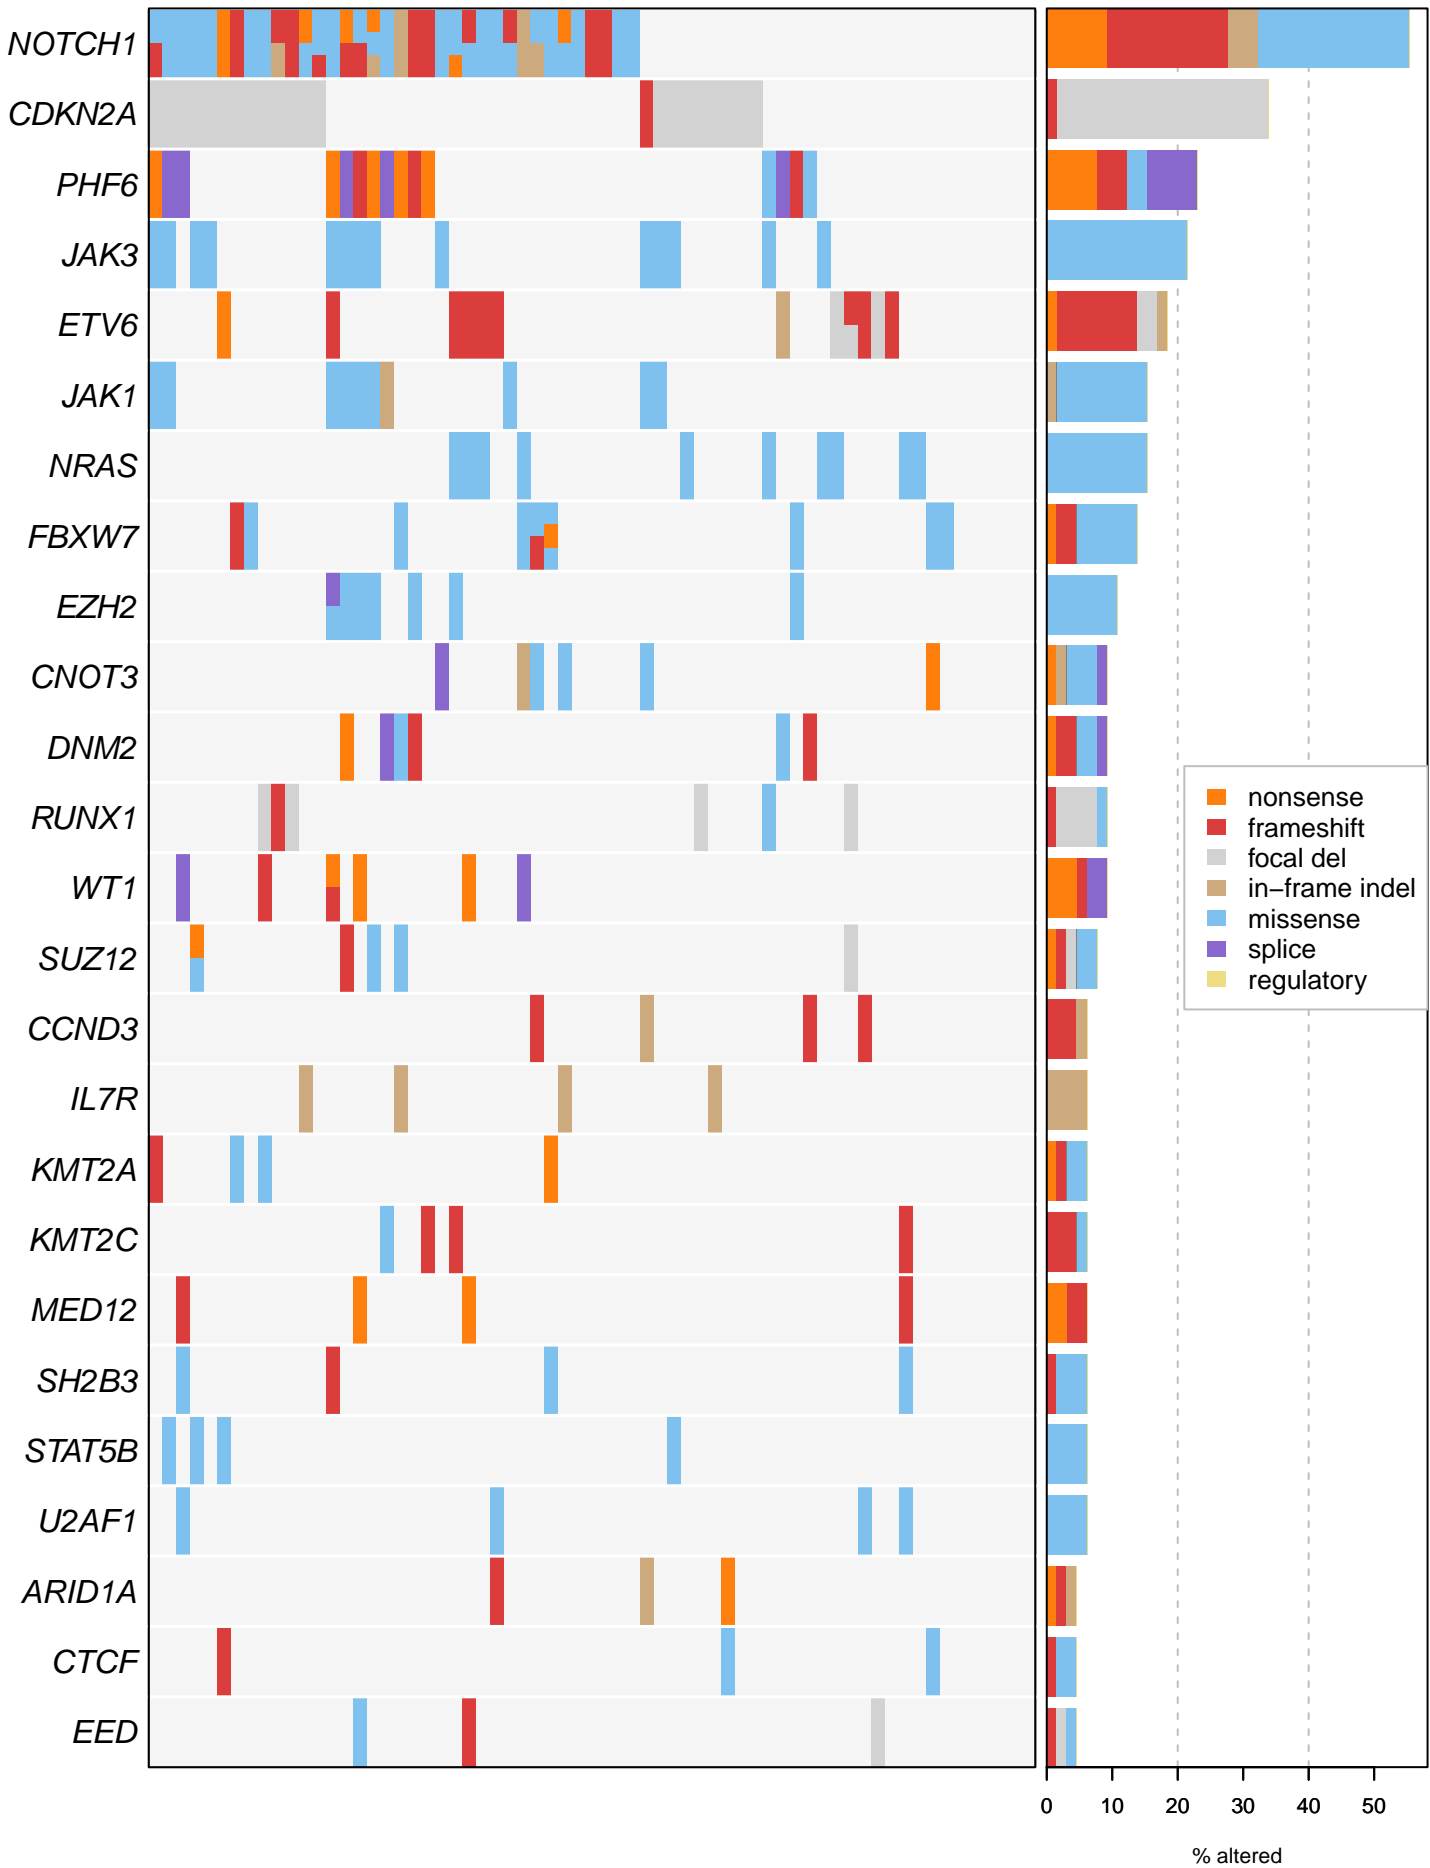



# Hyperdiploid (n=324) B-ALL

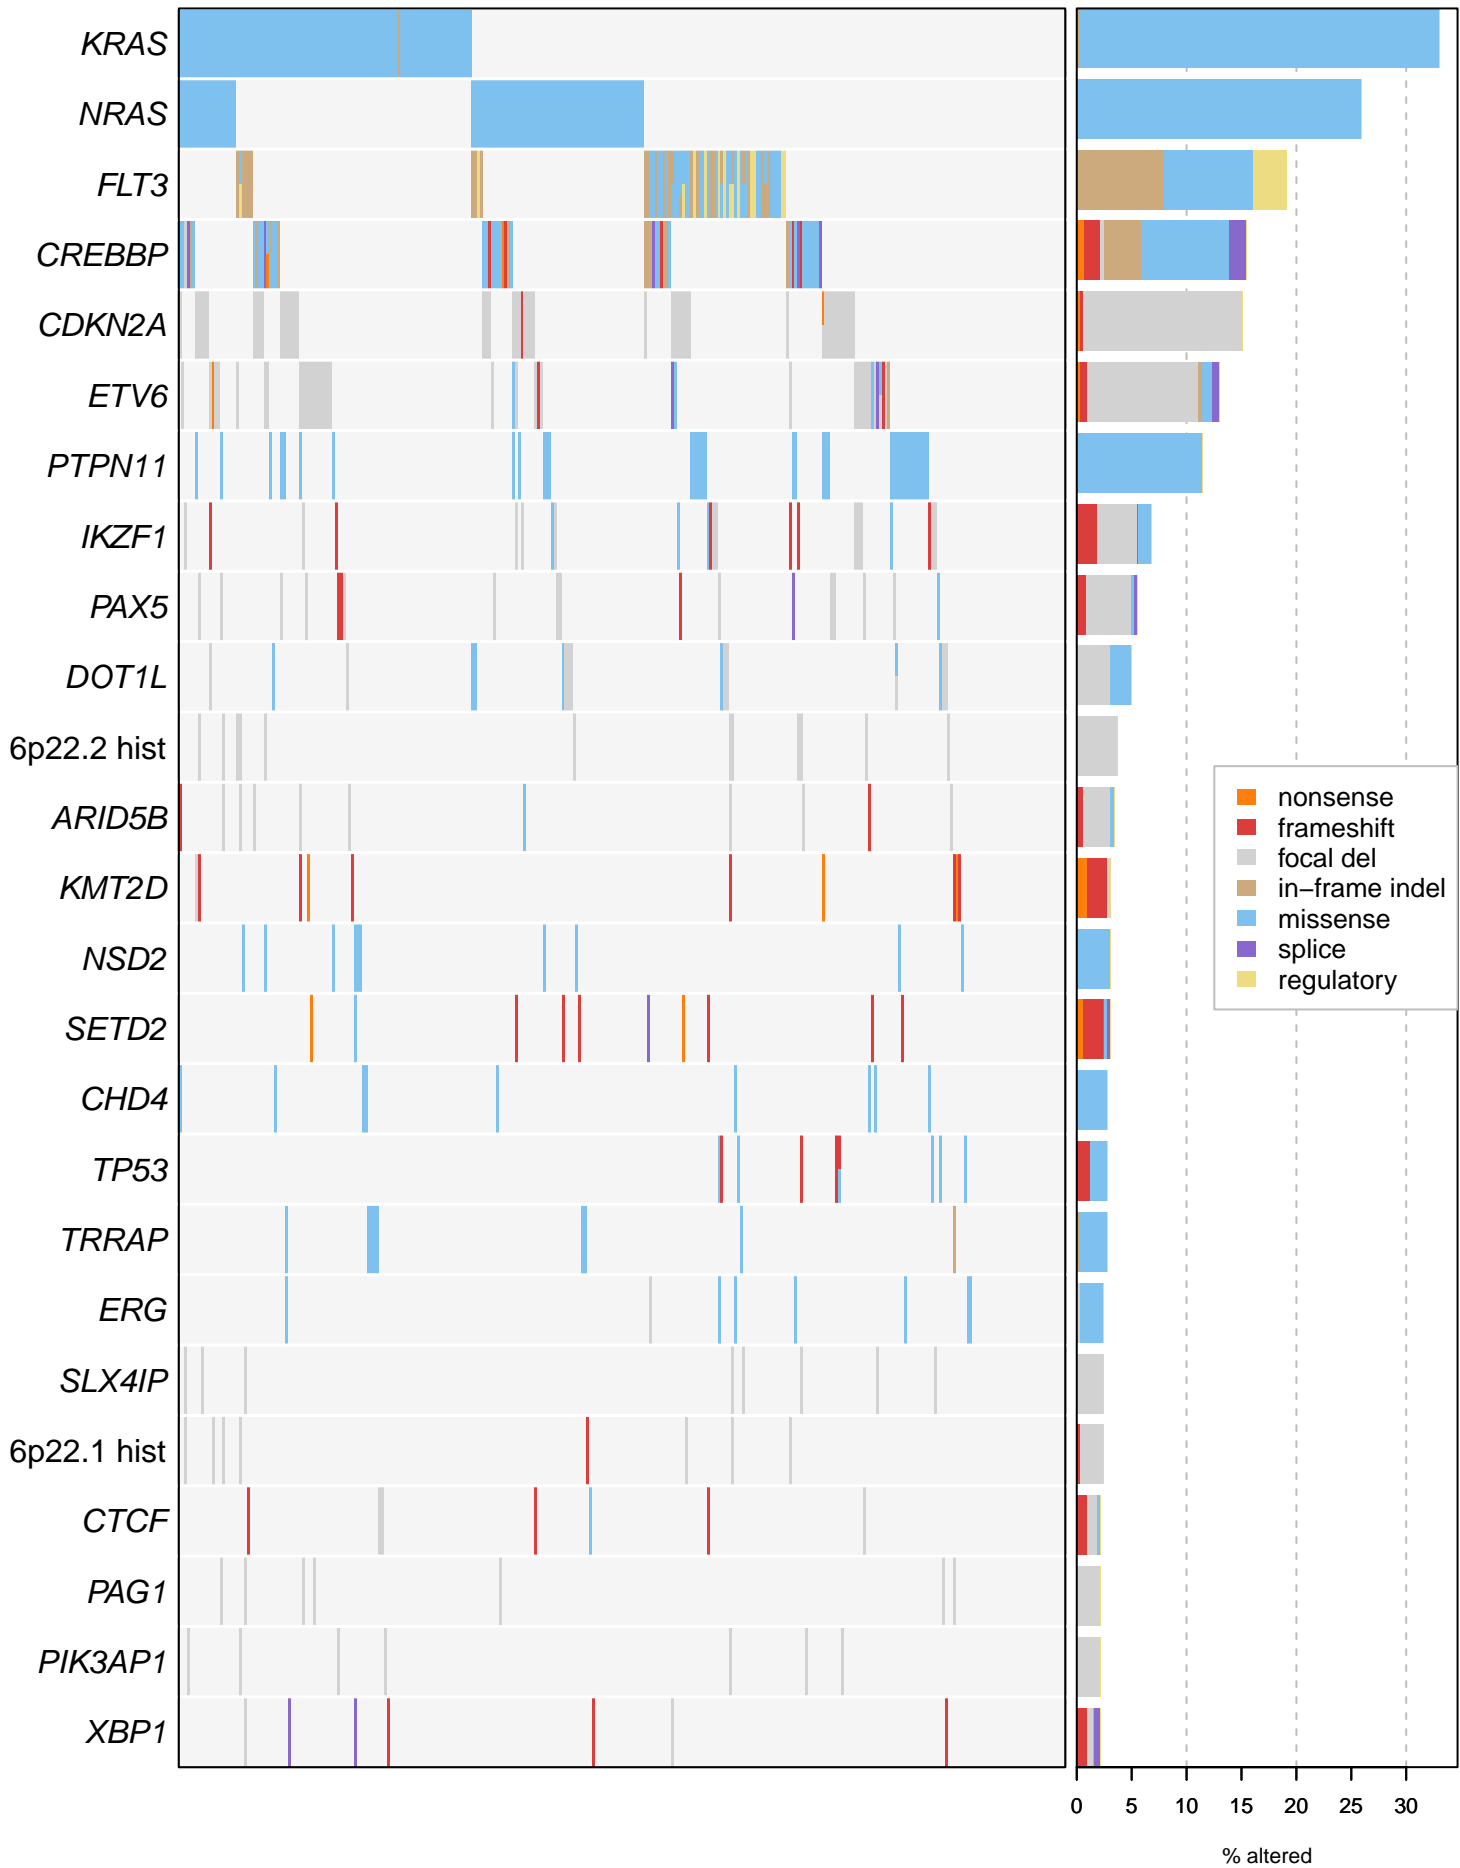

# iAMP21 (n=80) B-ALL

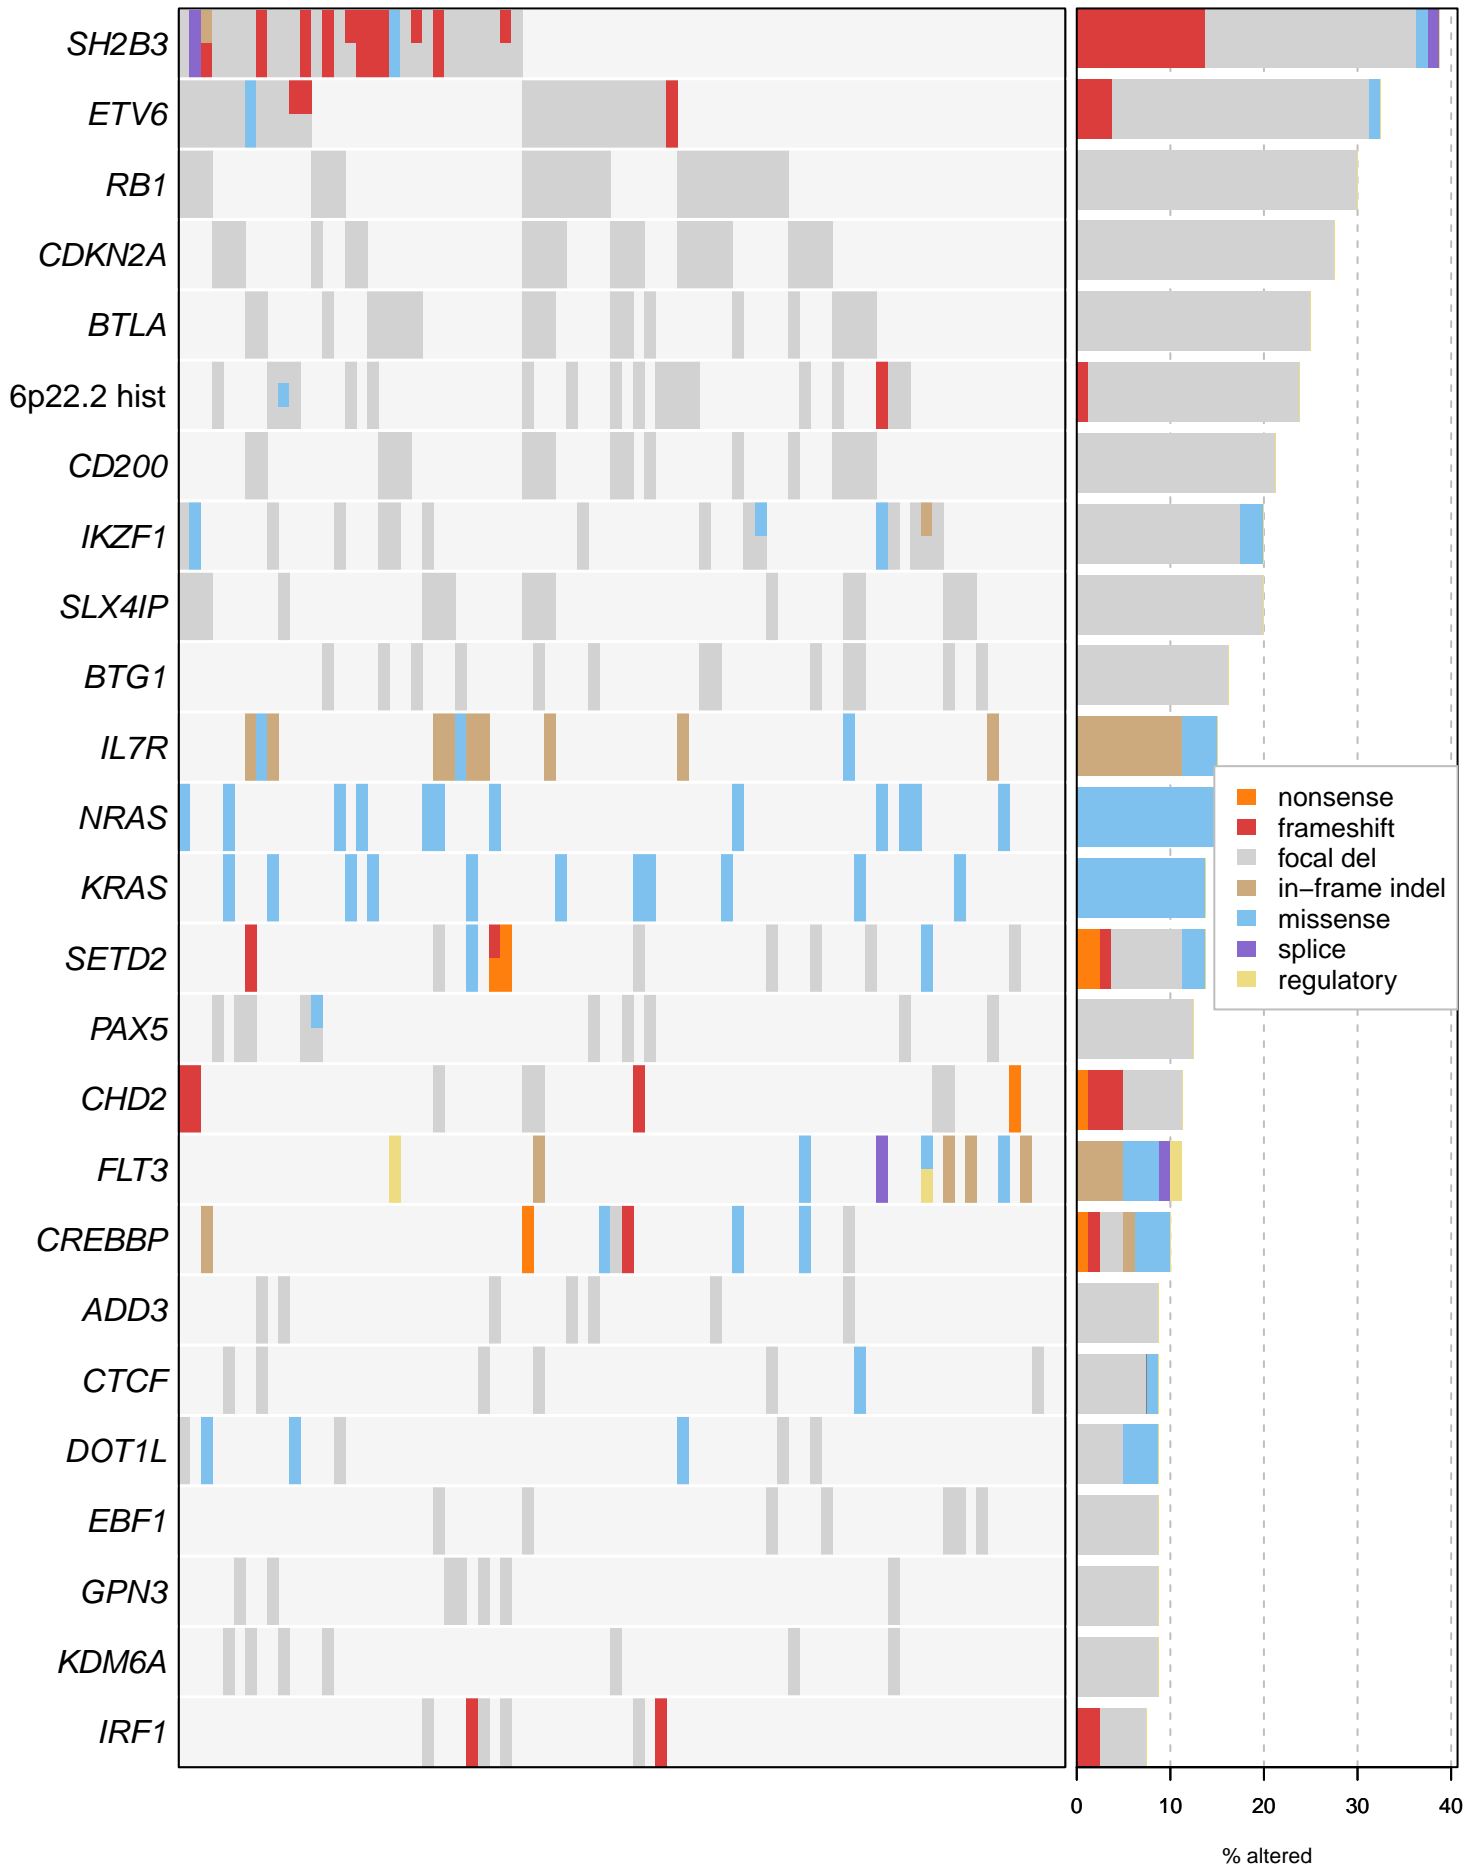

# IKZF1 N159Y (n=2) B-ALL

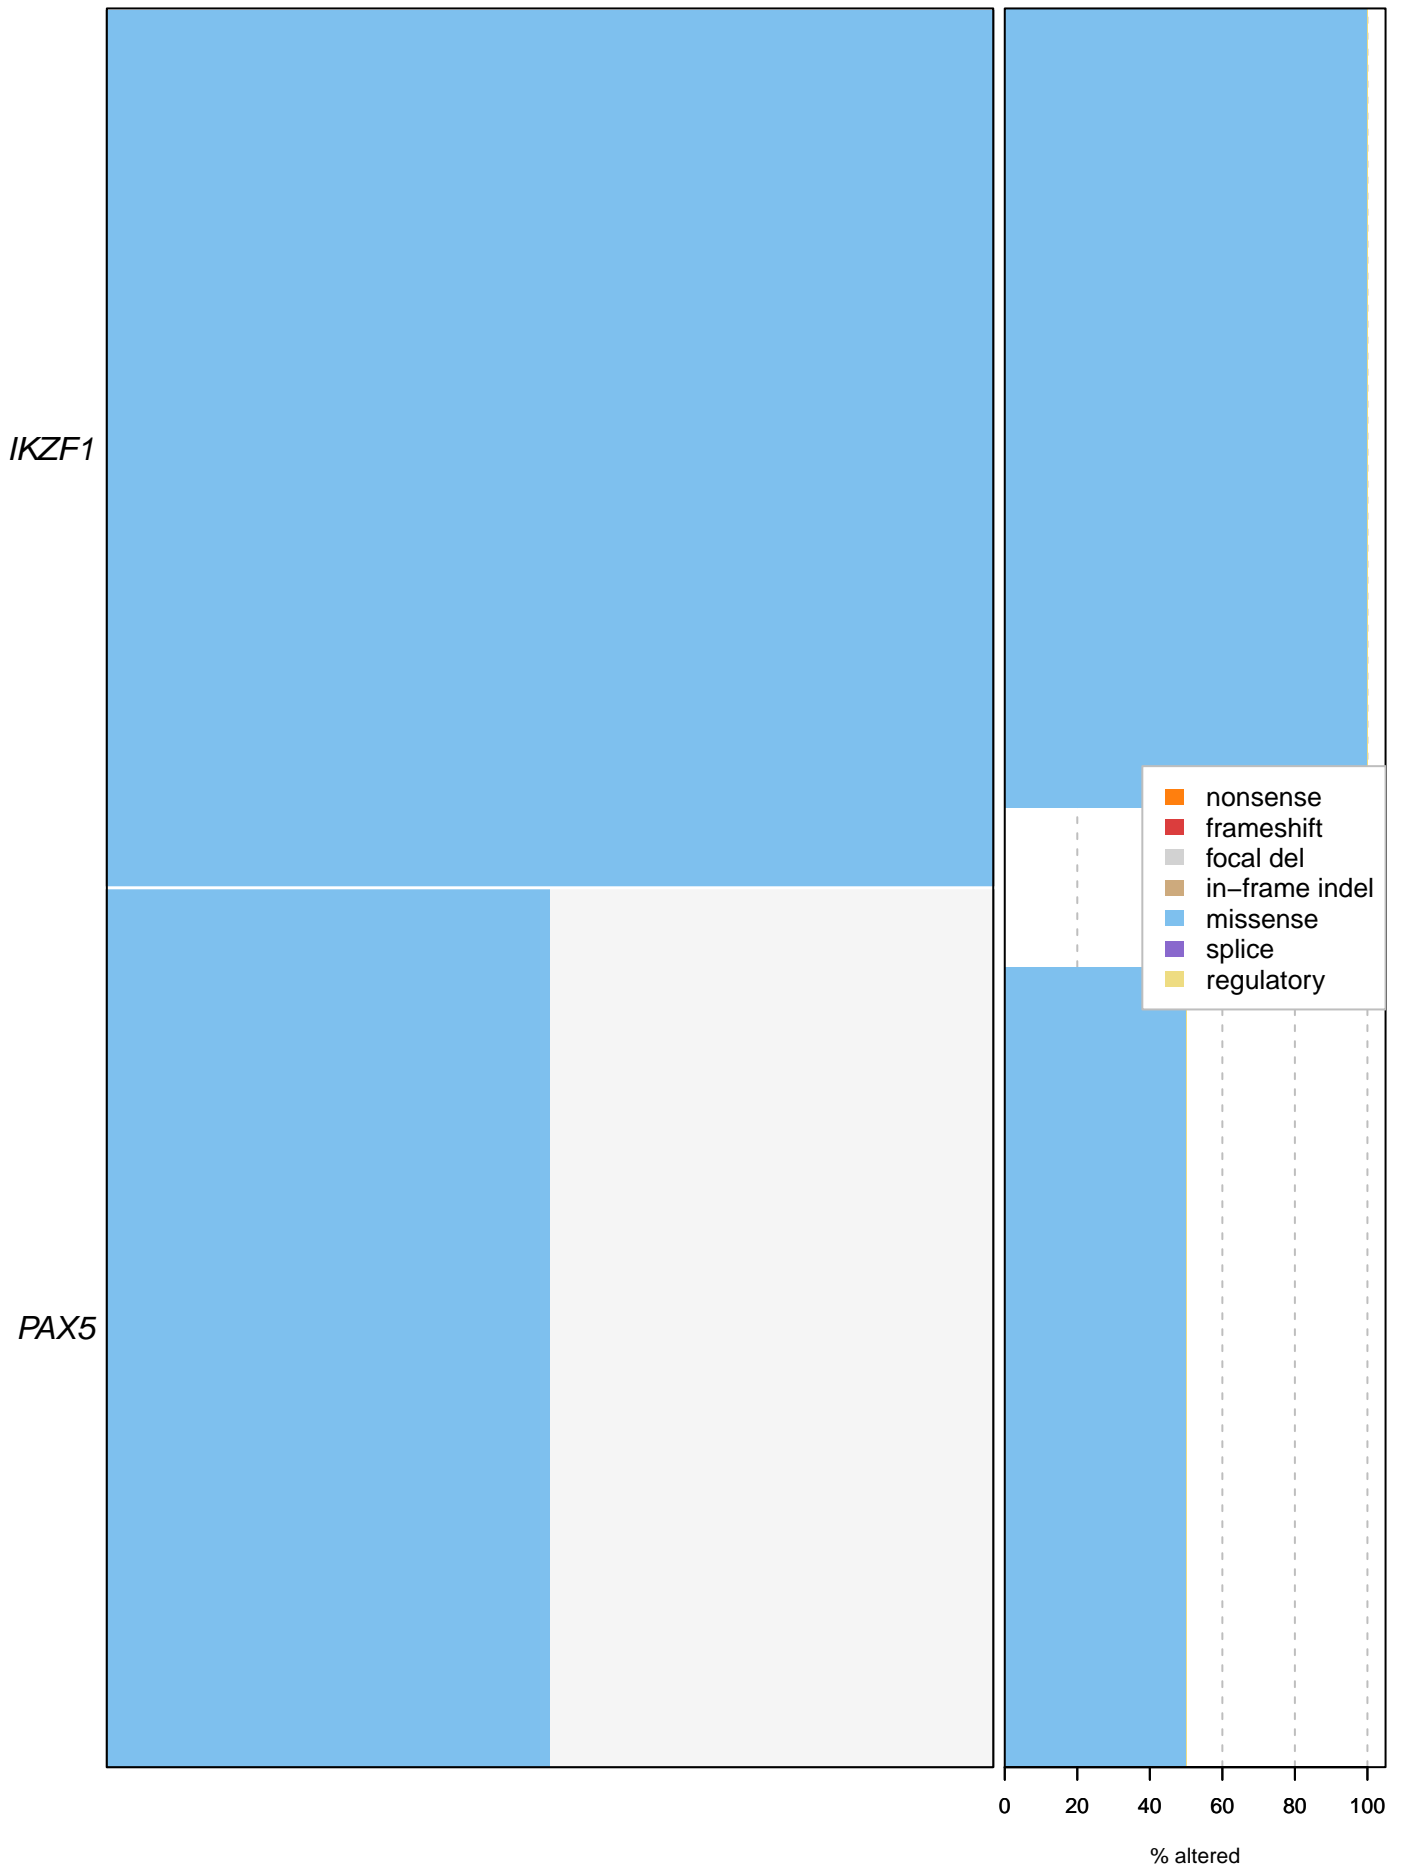

# KMT2A (n=50) B-ALL

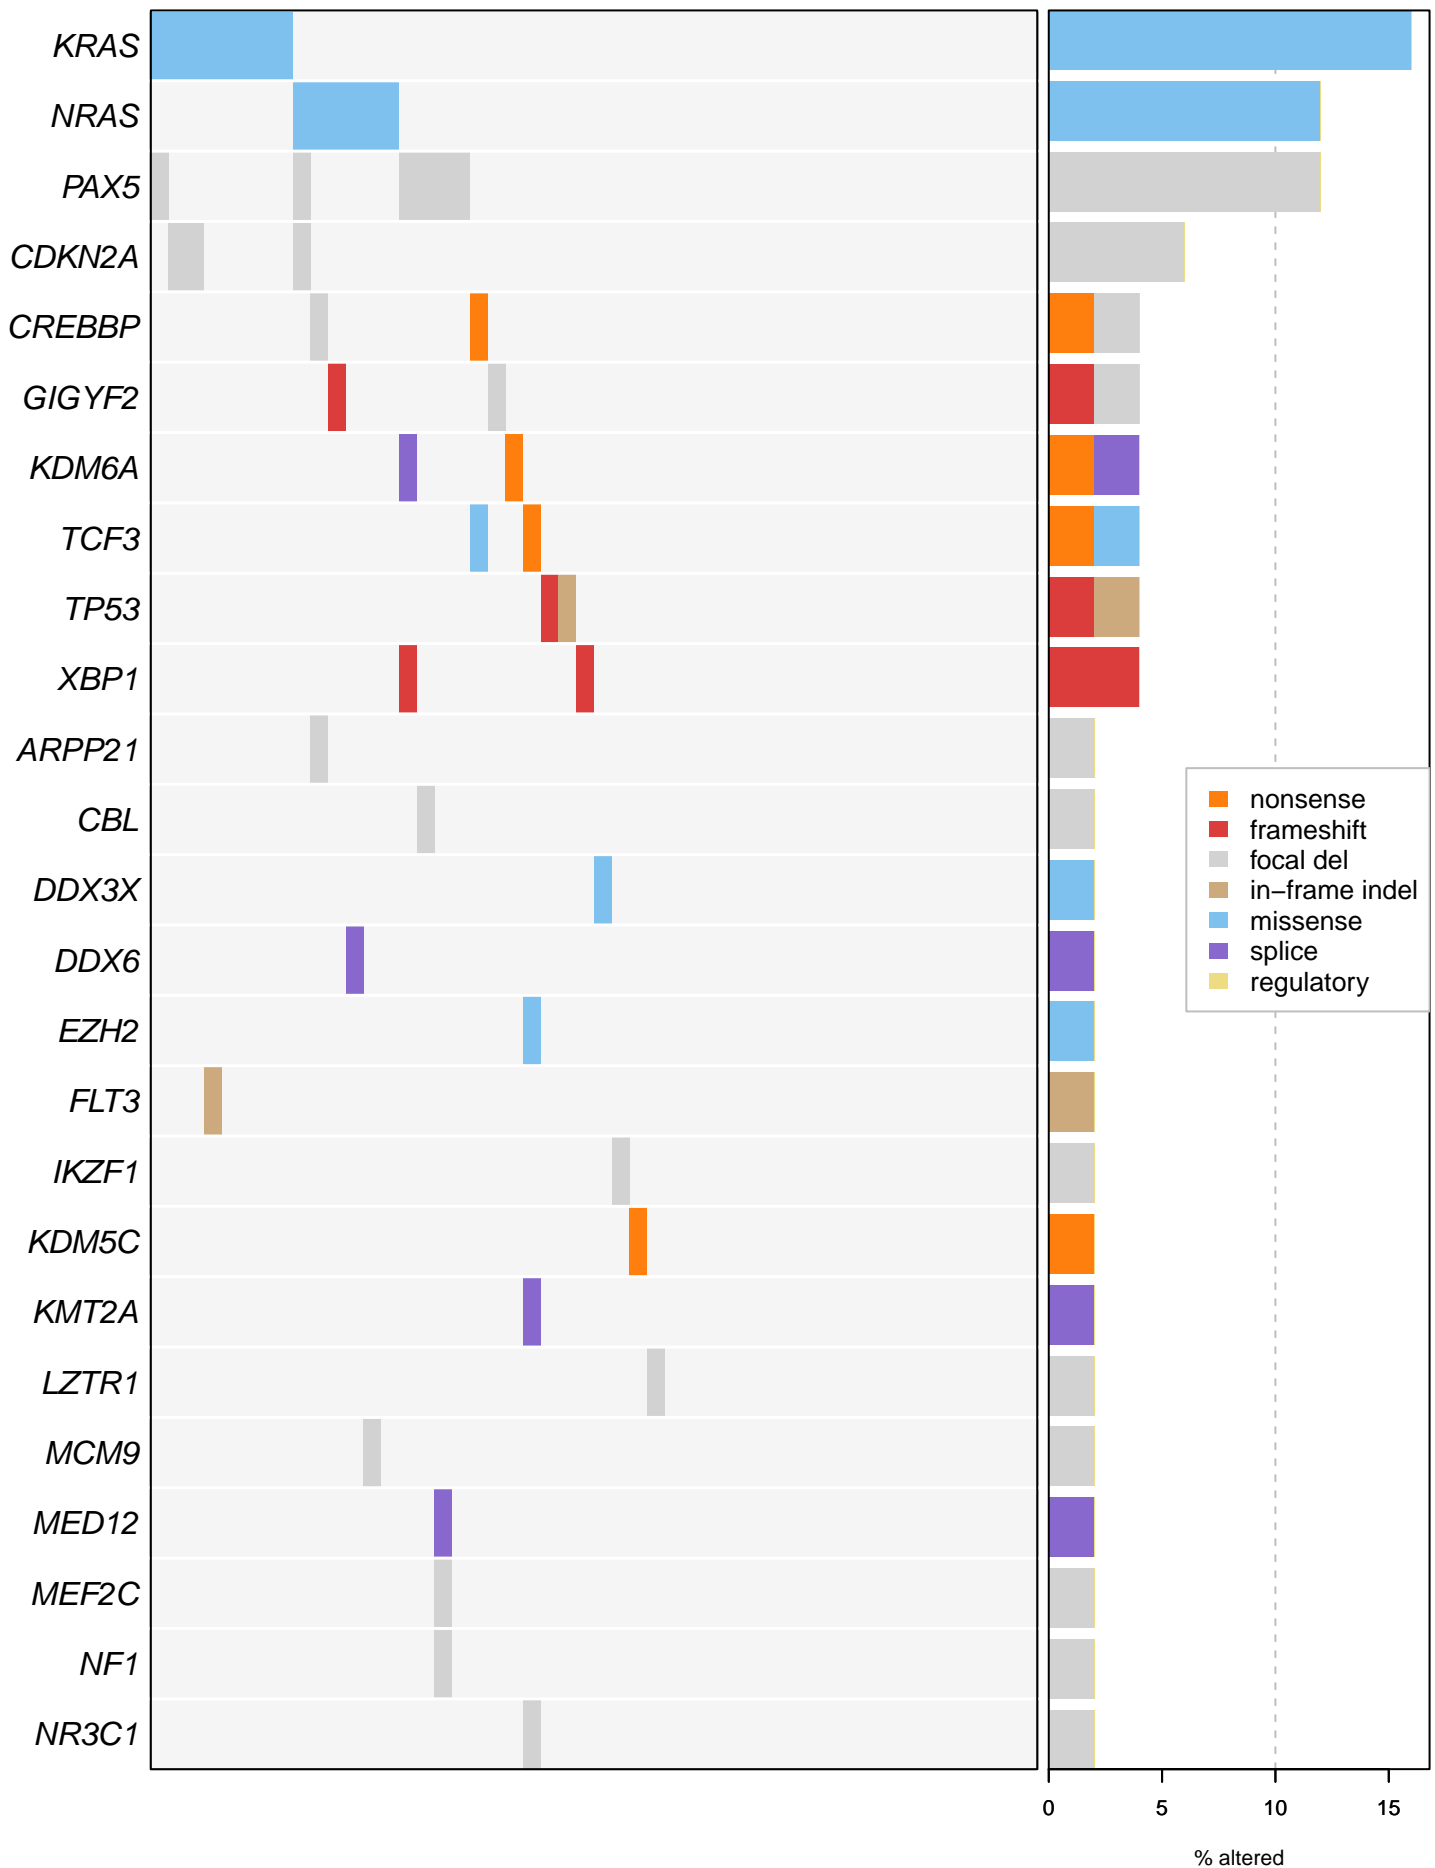

# LMO1/2 (n=18) T-ALL

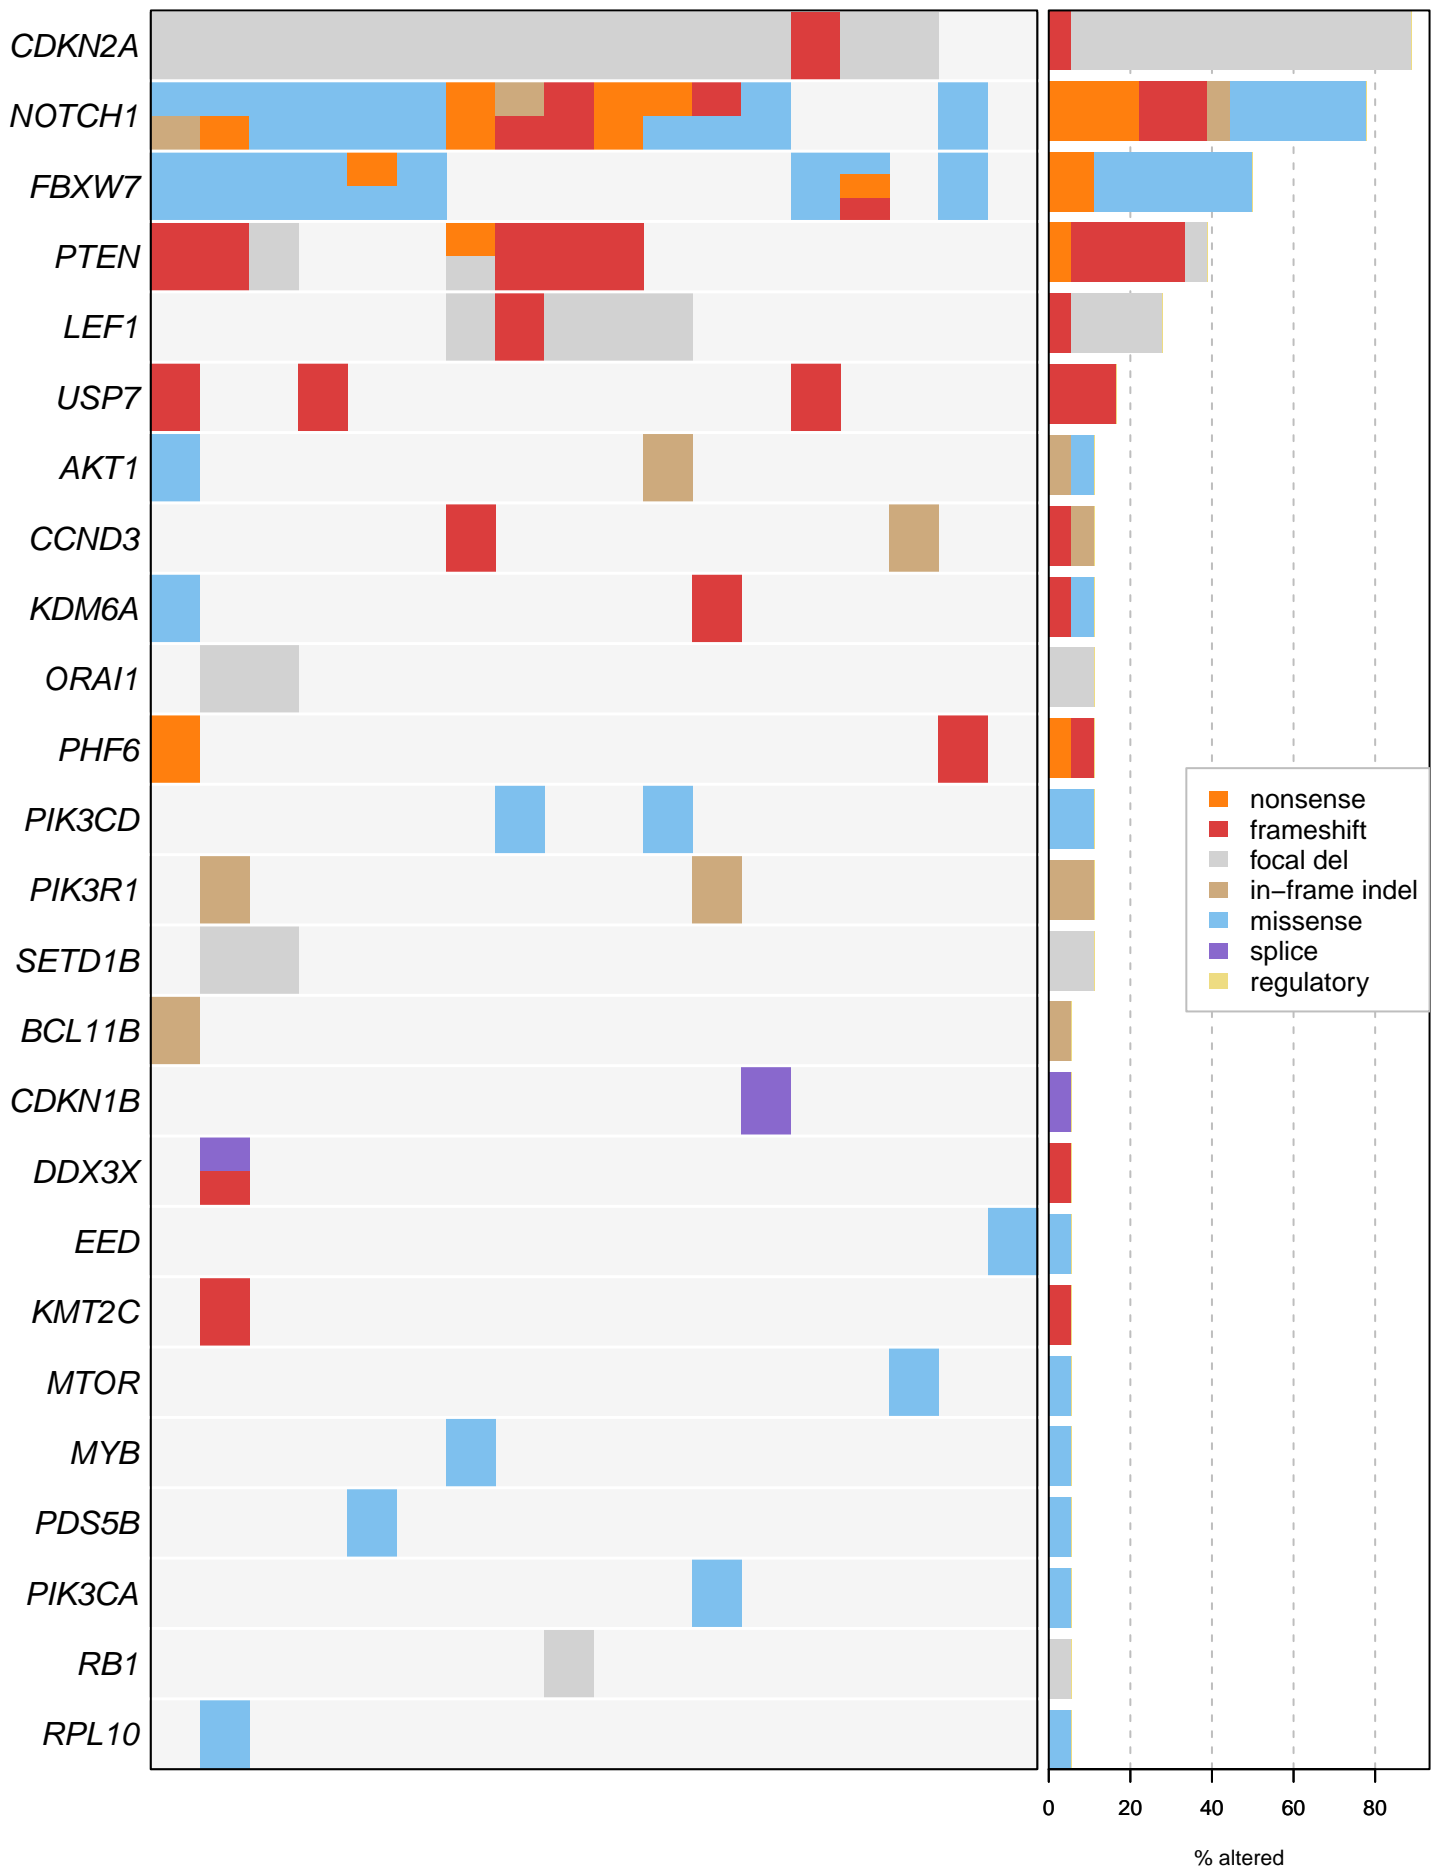



# MEF2D (n=16) B-ALL

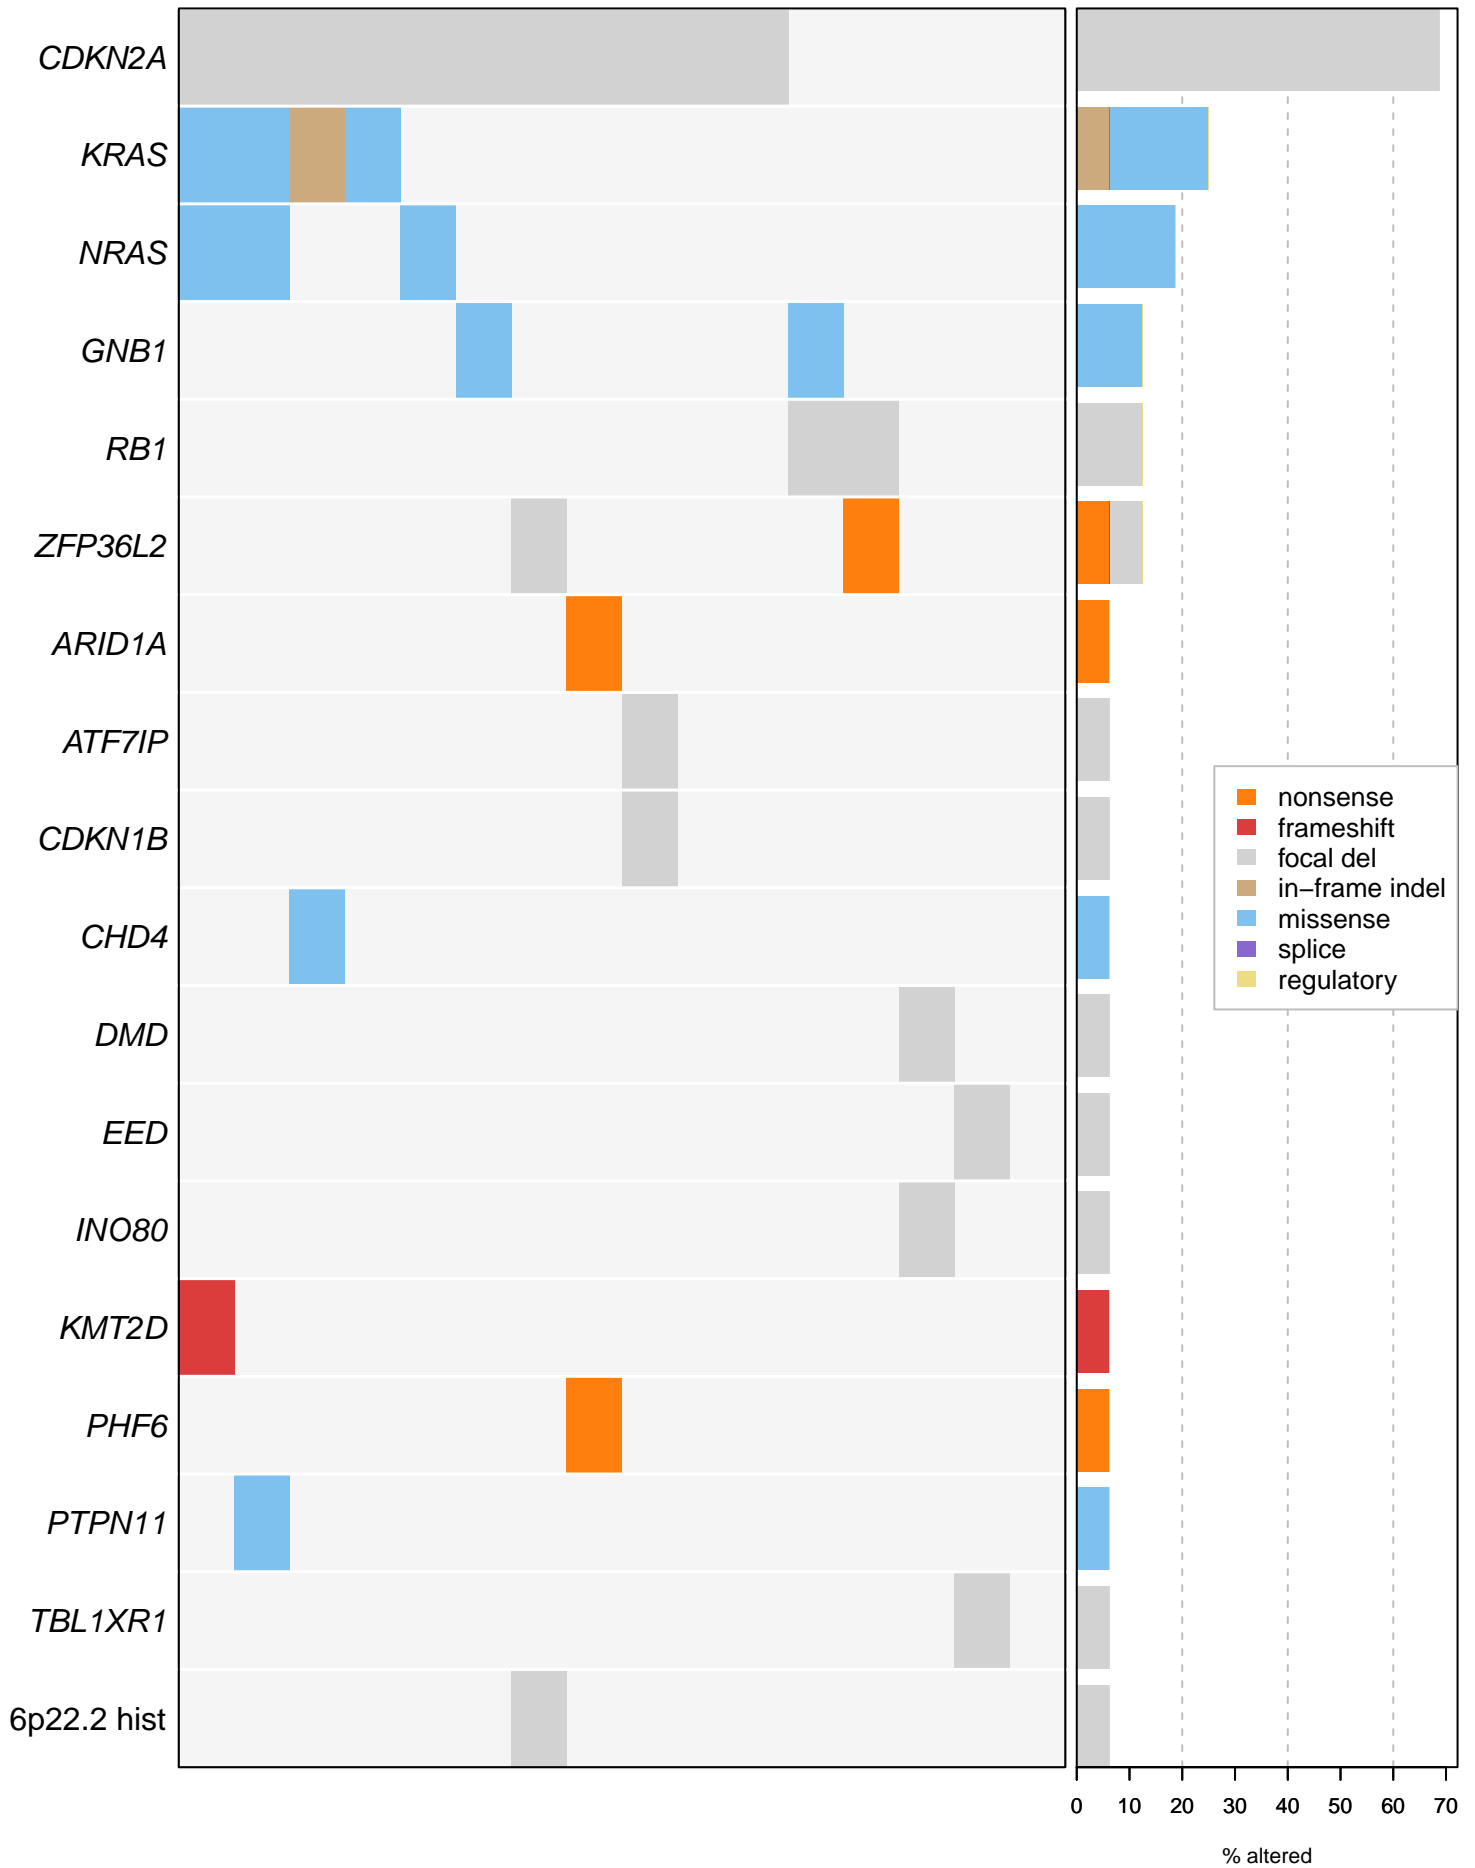

# Near haploid (n=24) B-ALL

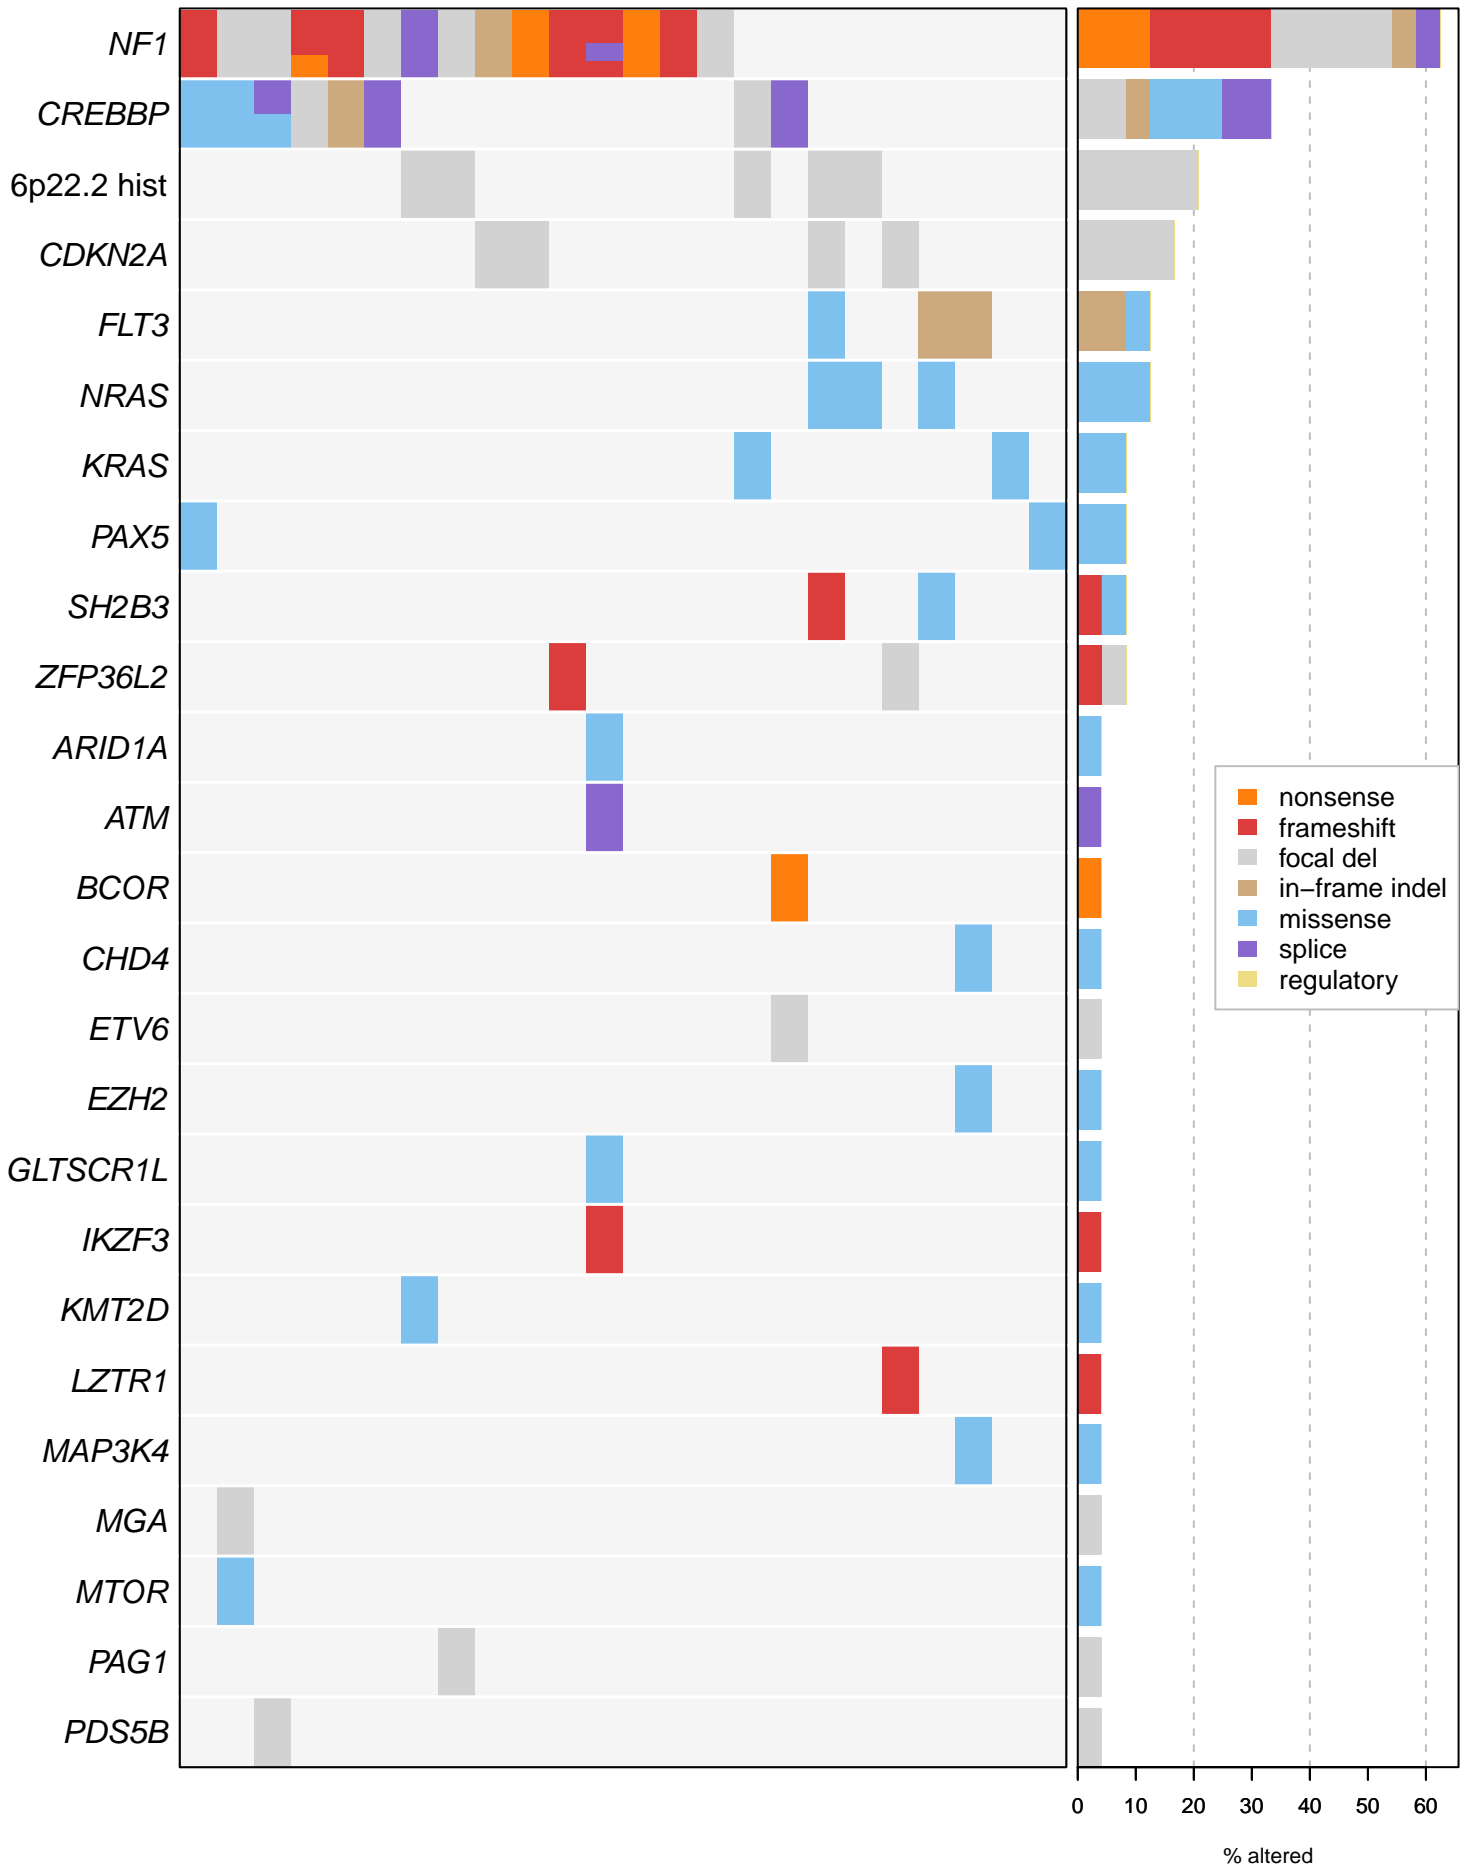



# NKX2-1 (n=18) T-ALL

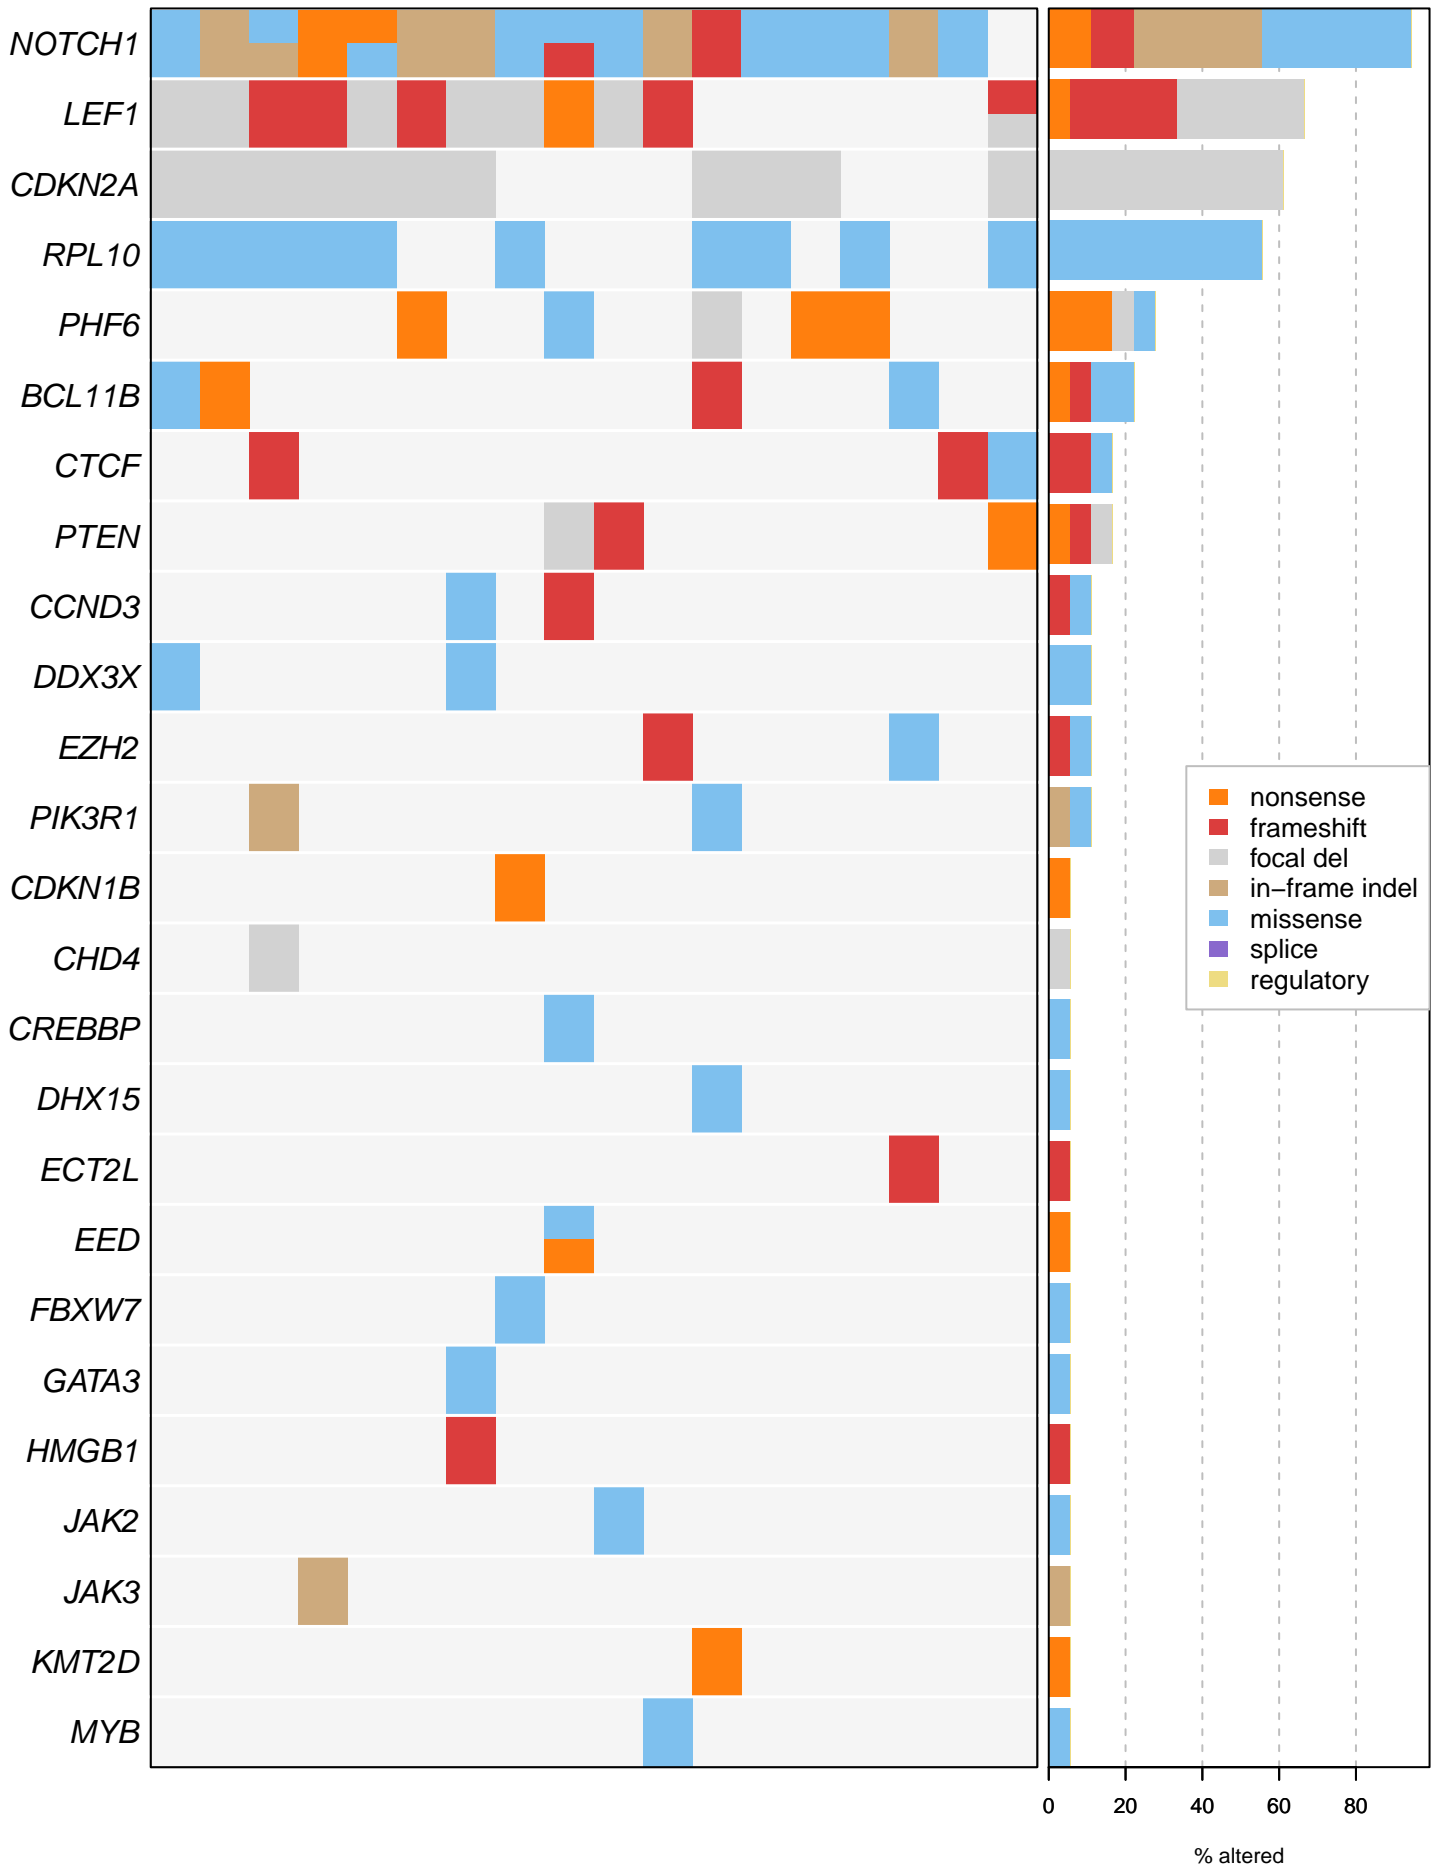

# NUTM1 (n=4) B-ALL

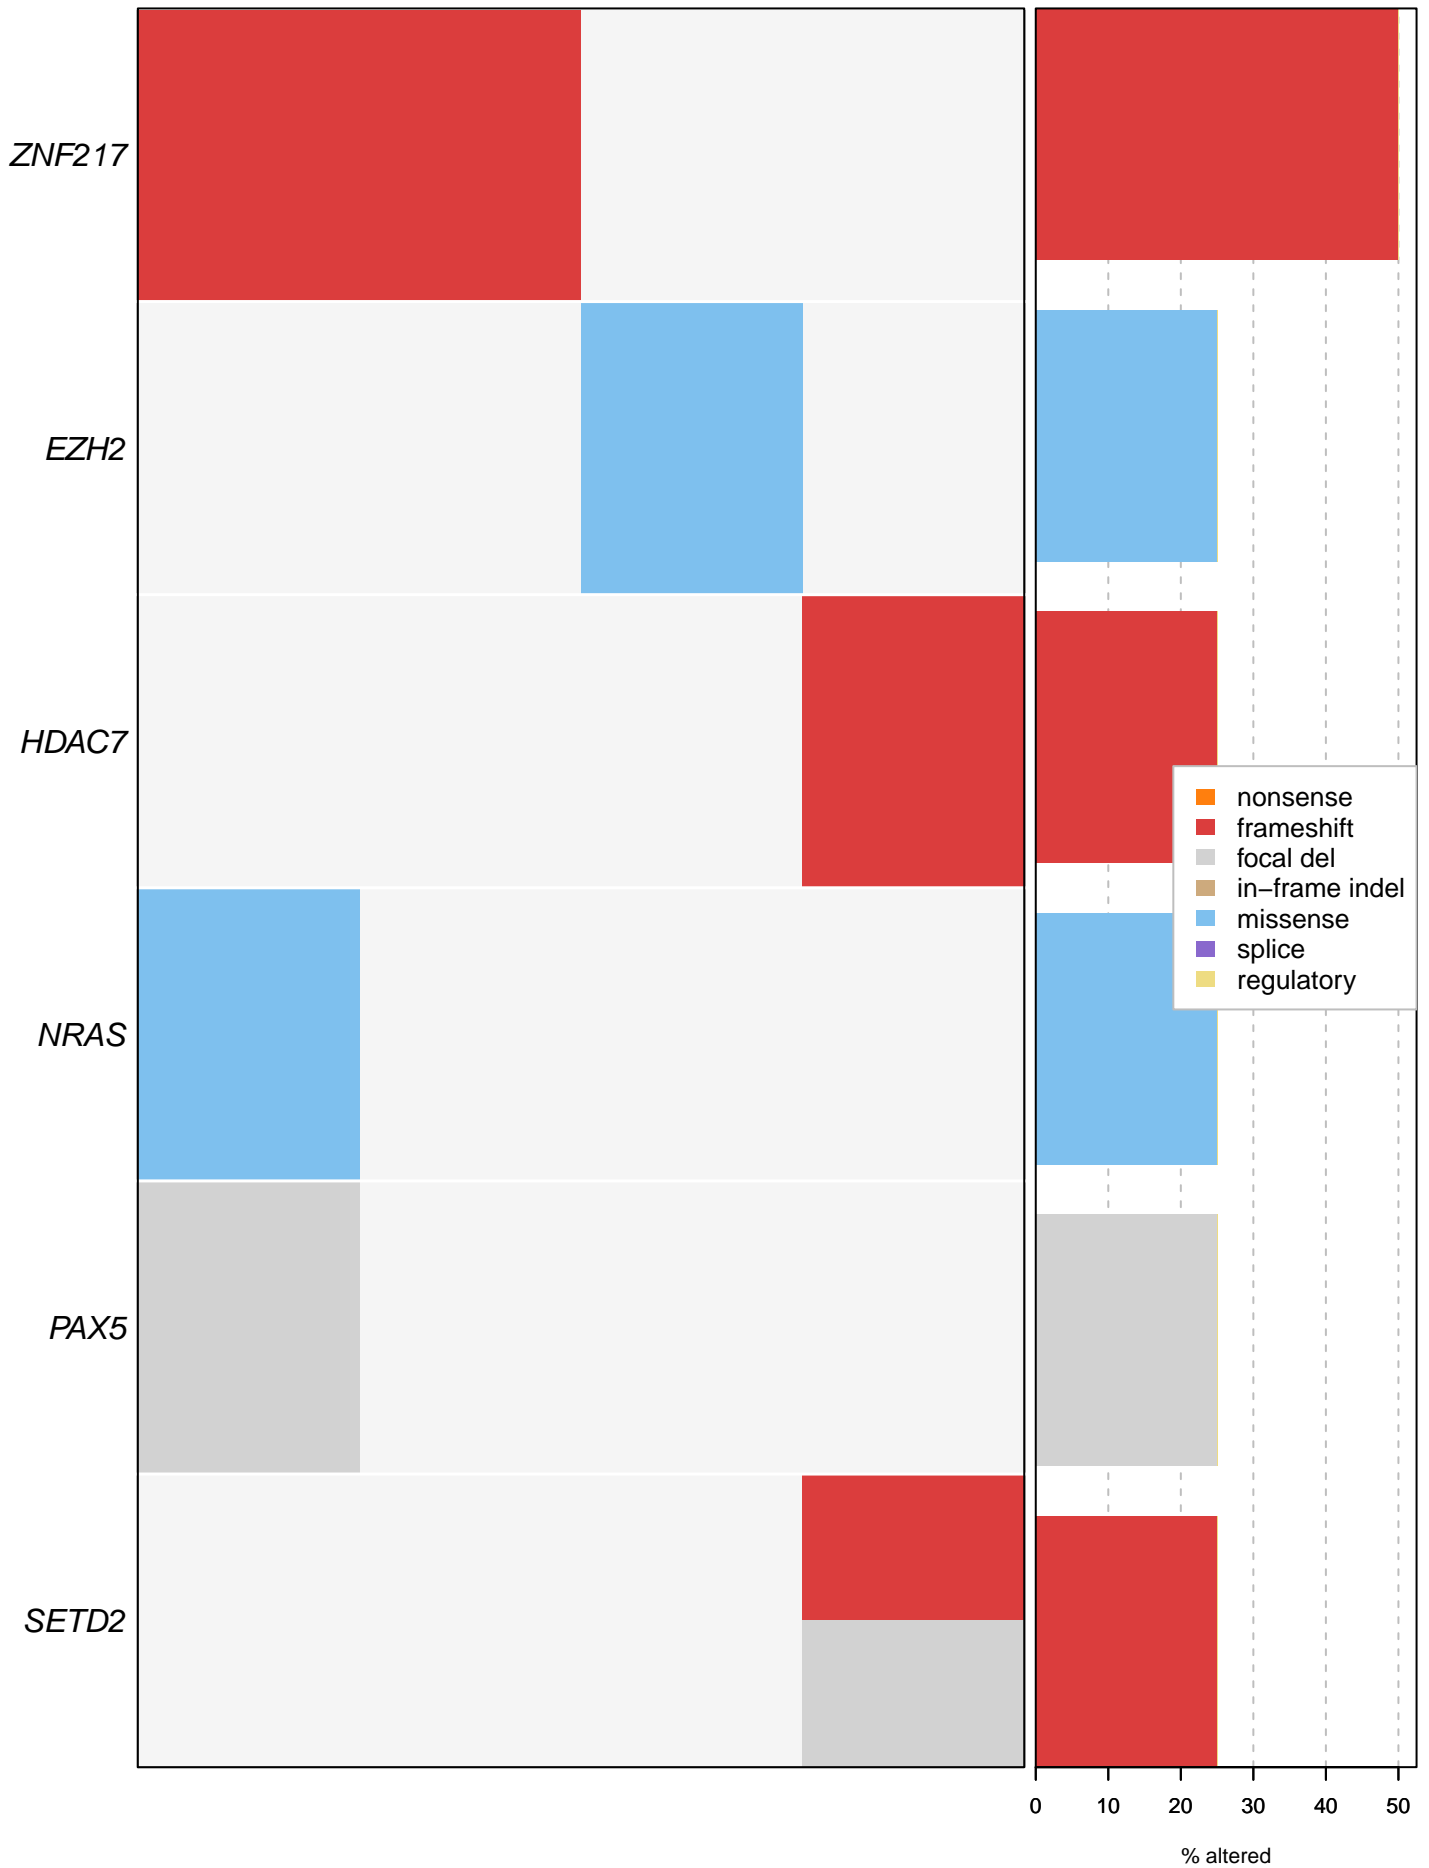

# PAX5 P80R (n=13) B-ALL

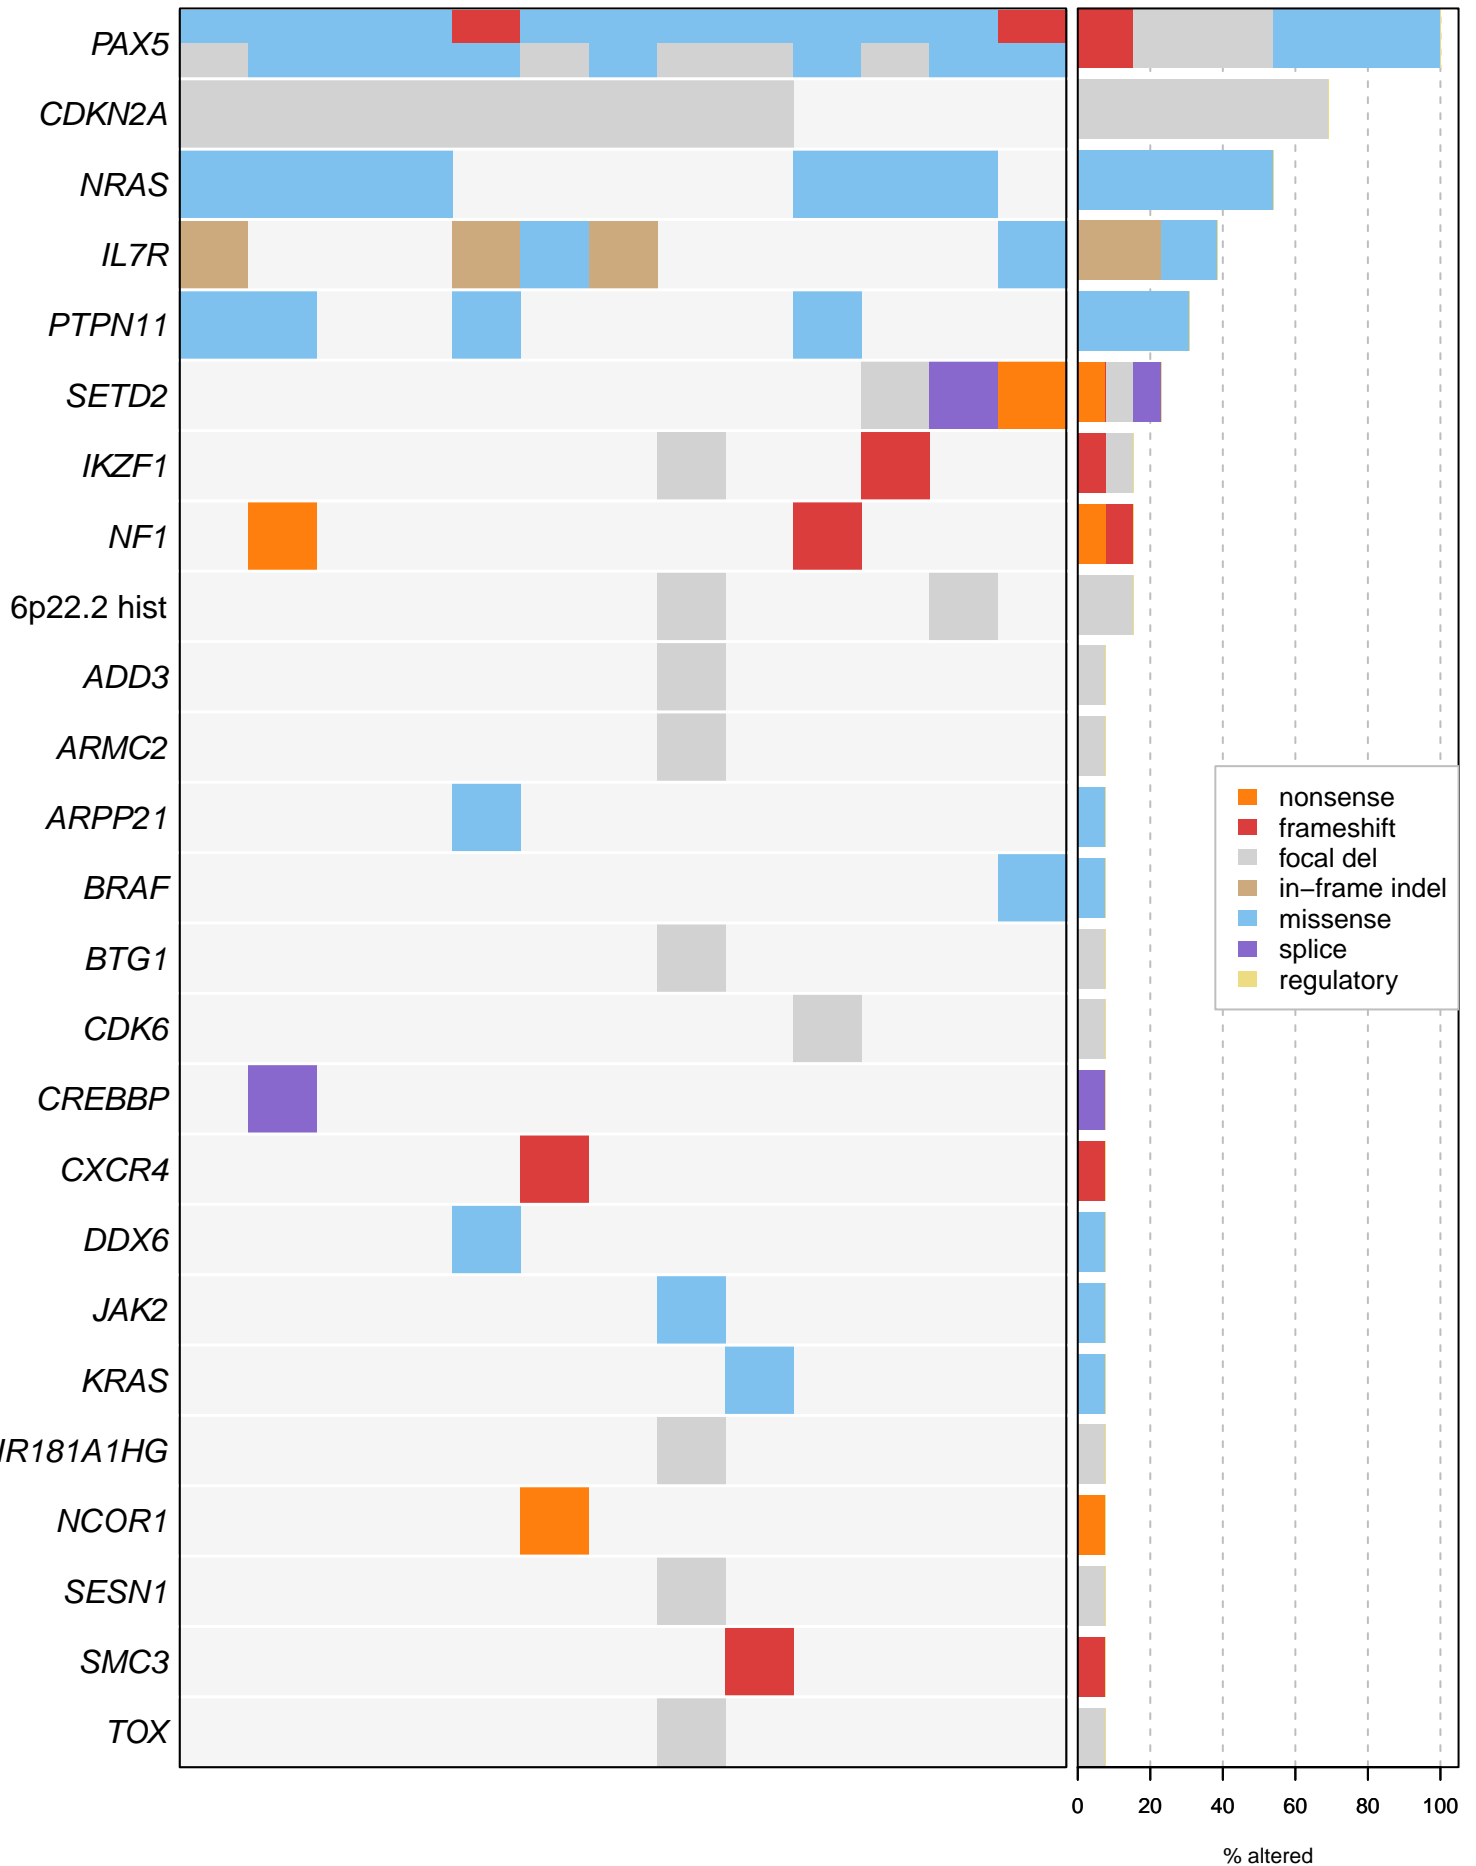





# Ph-like other (n=54) B-ALL

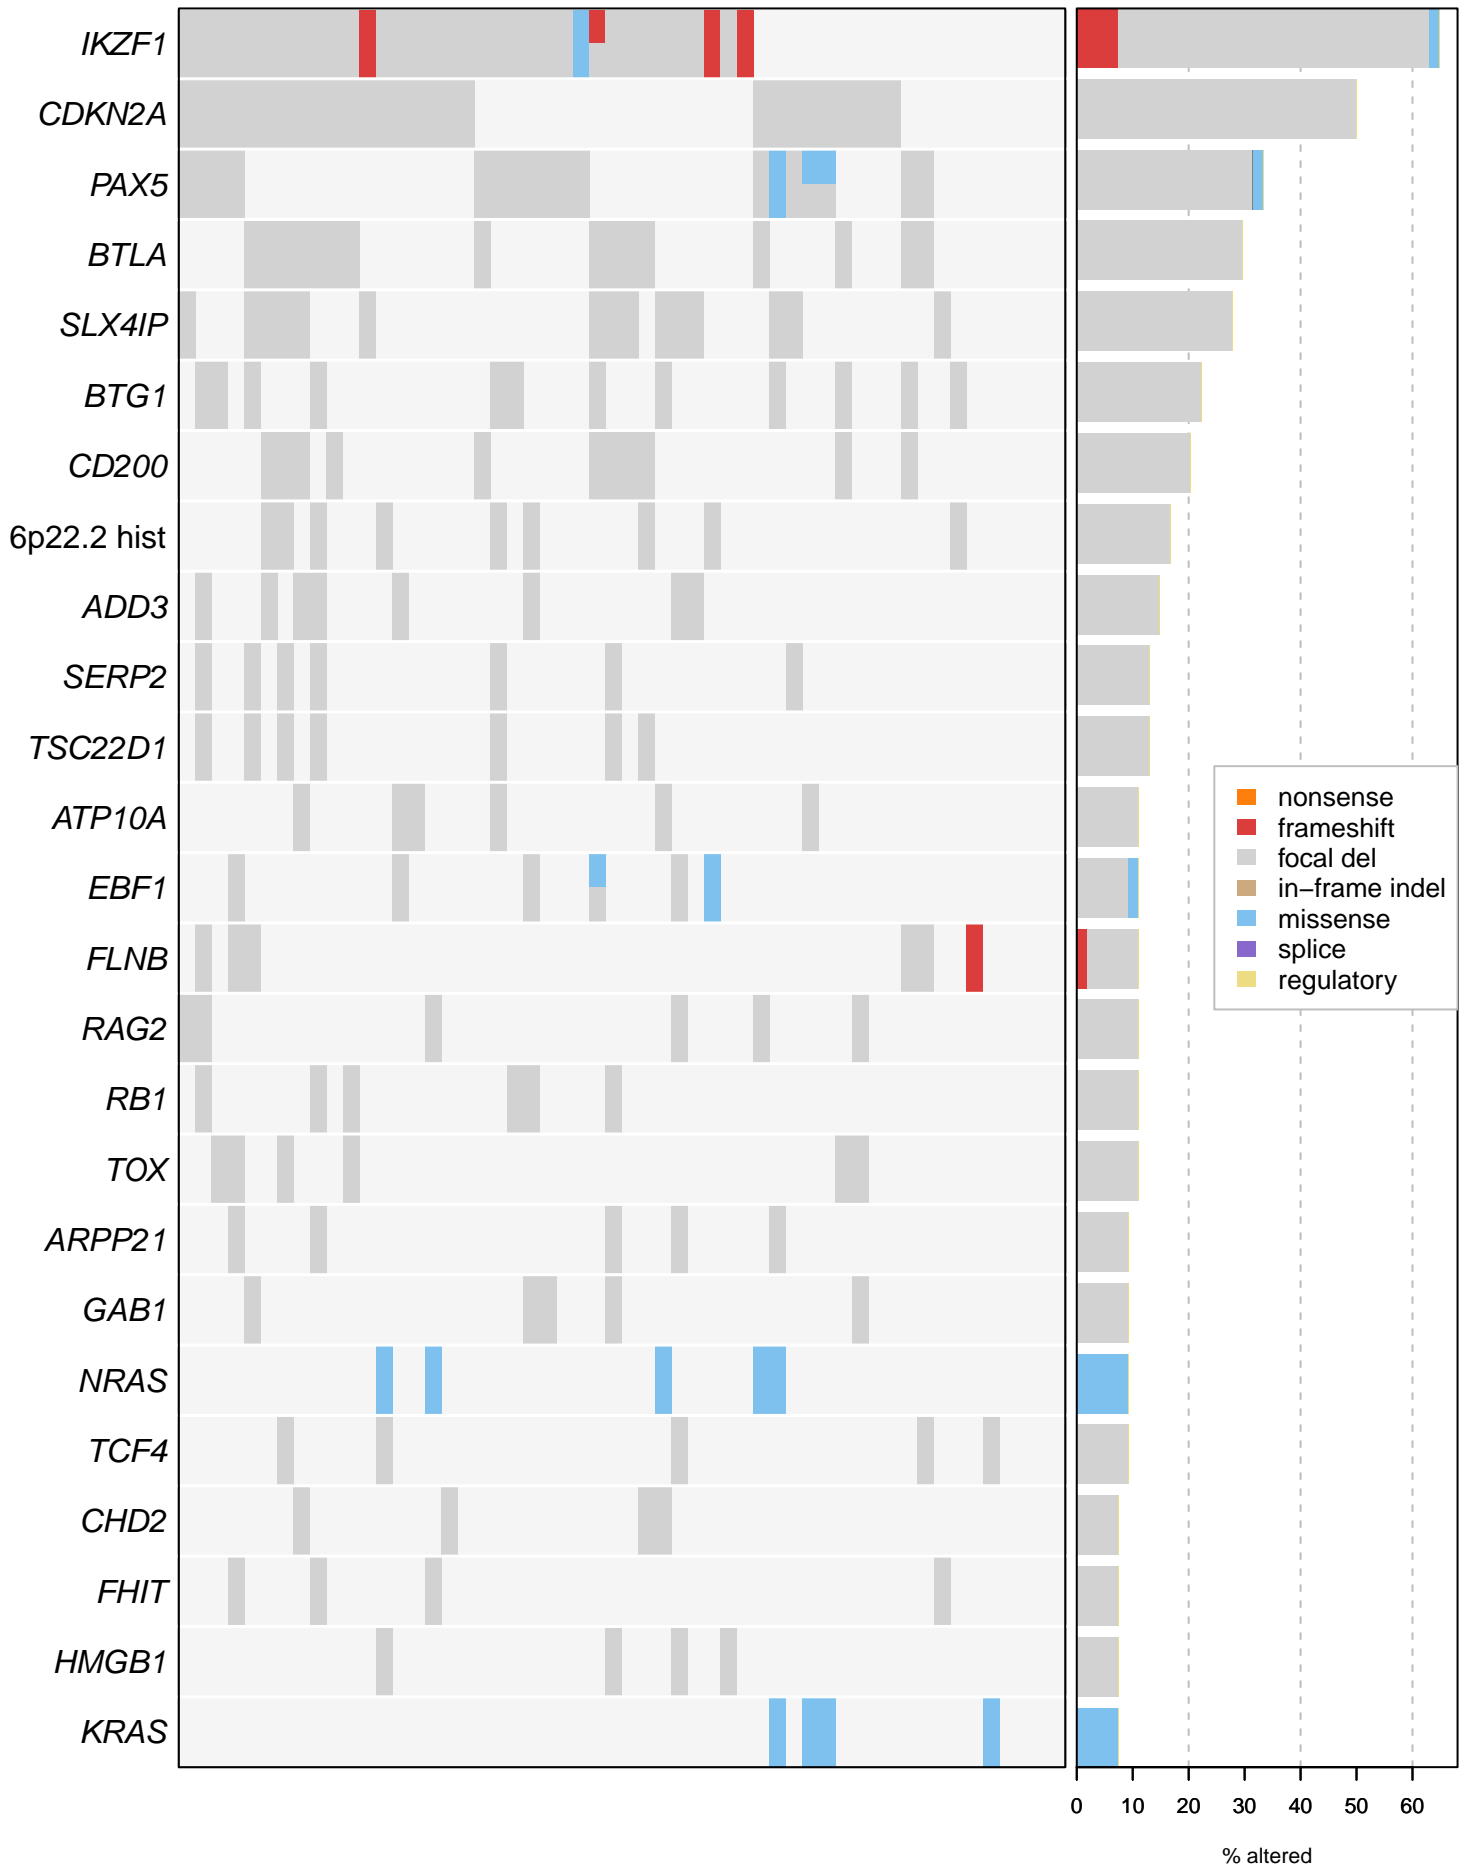

# Ph (n=65) B-ALL

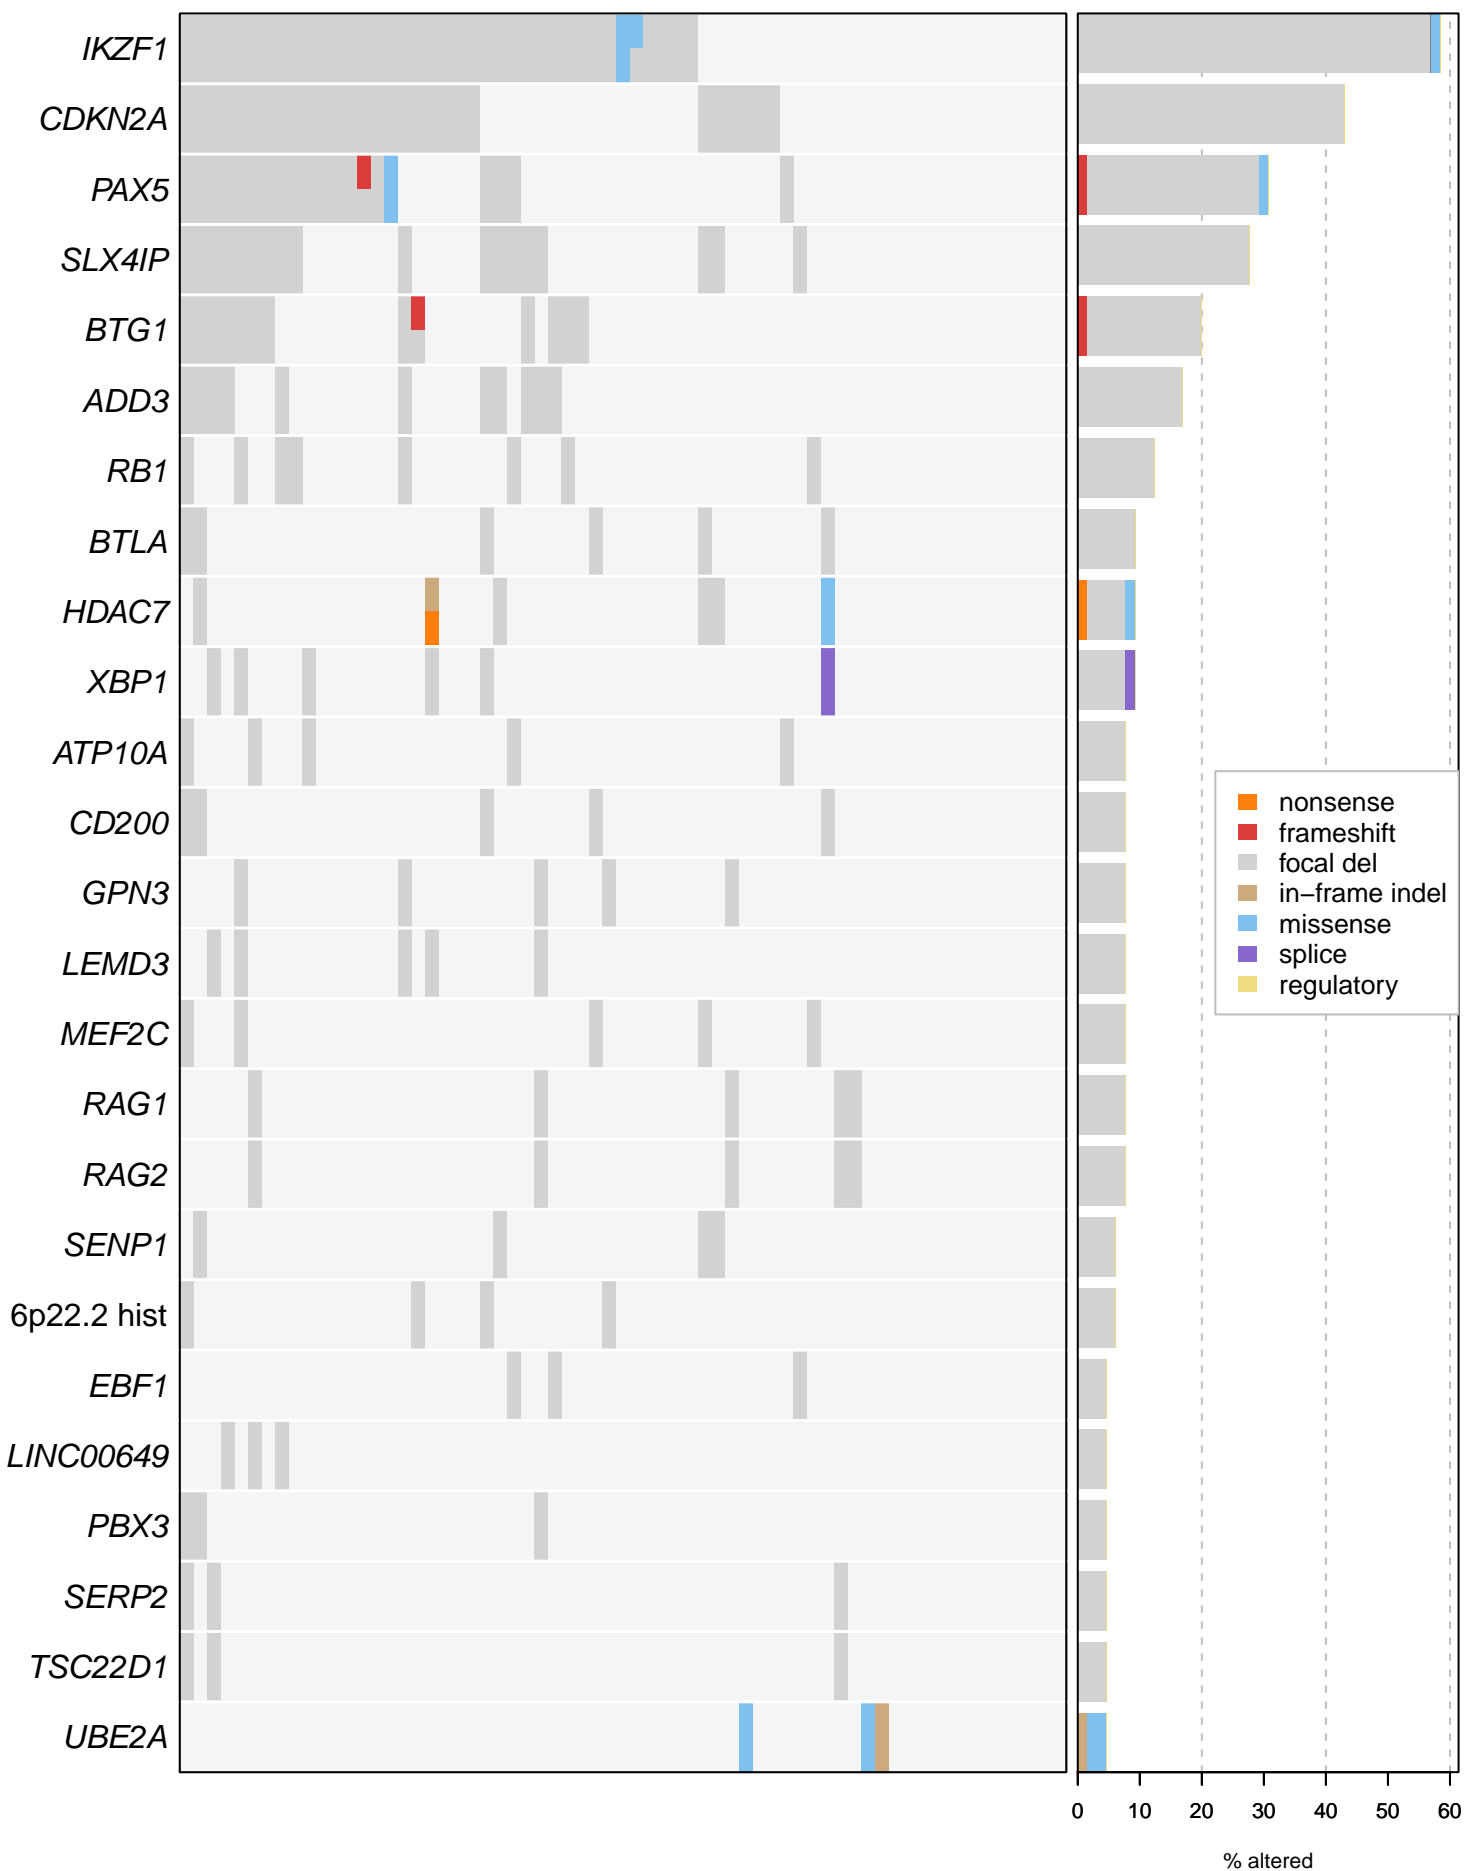

# SPI1 (n=2) T-ALL

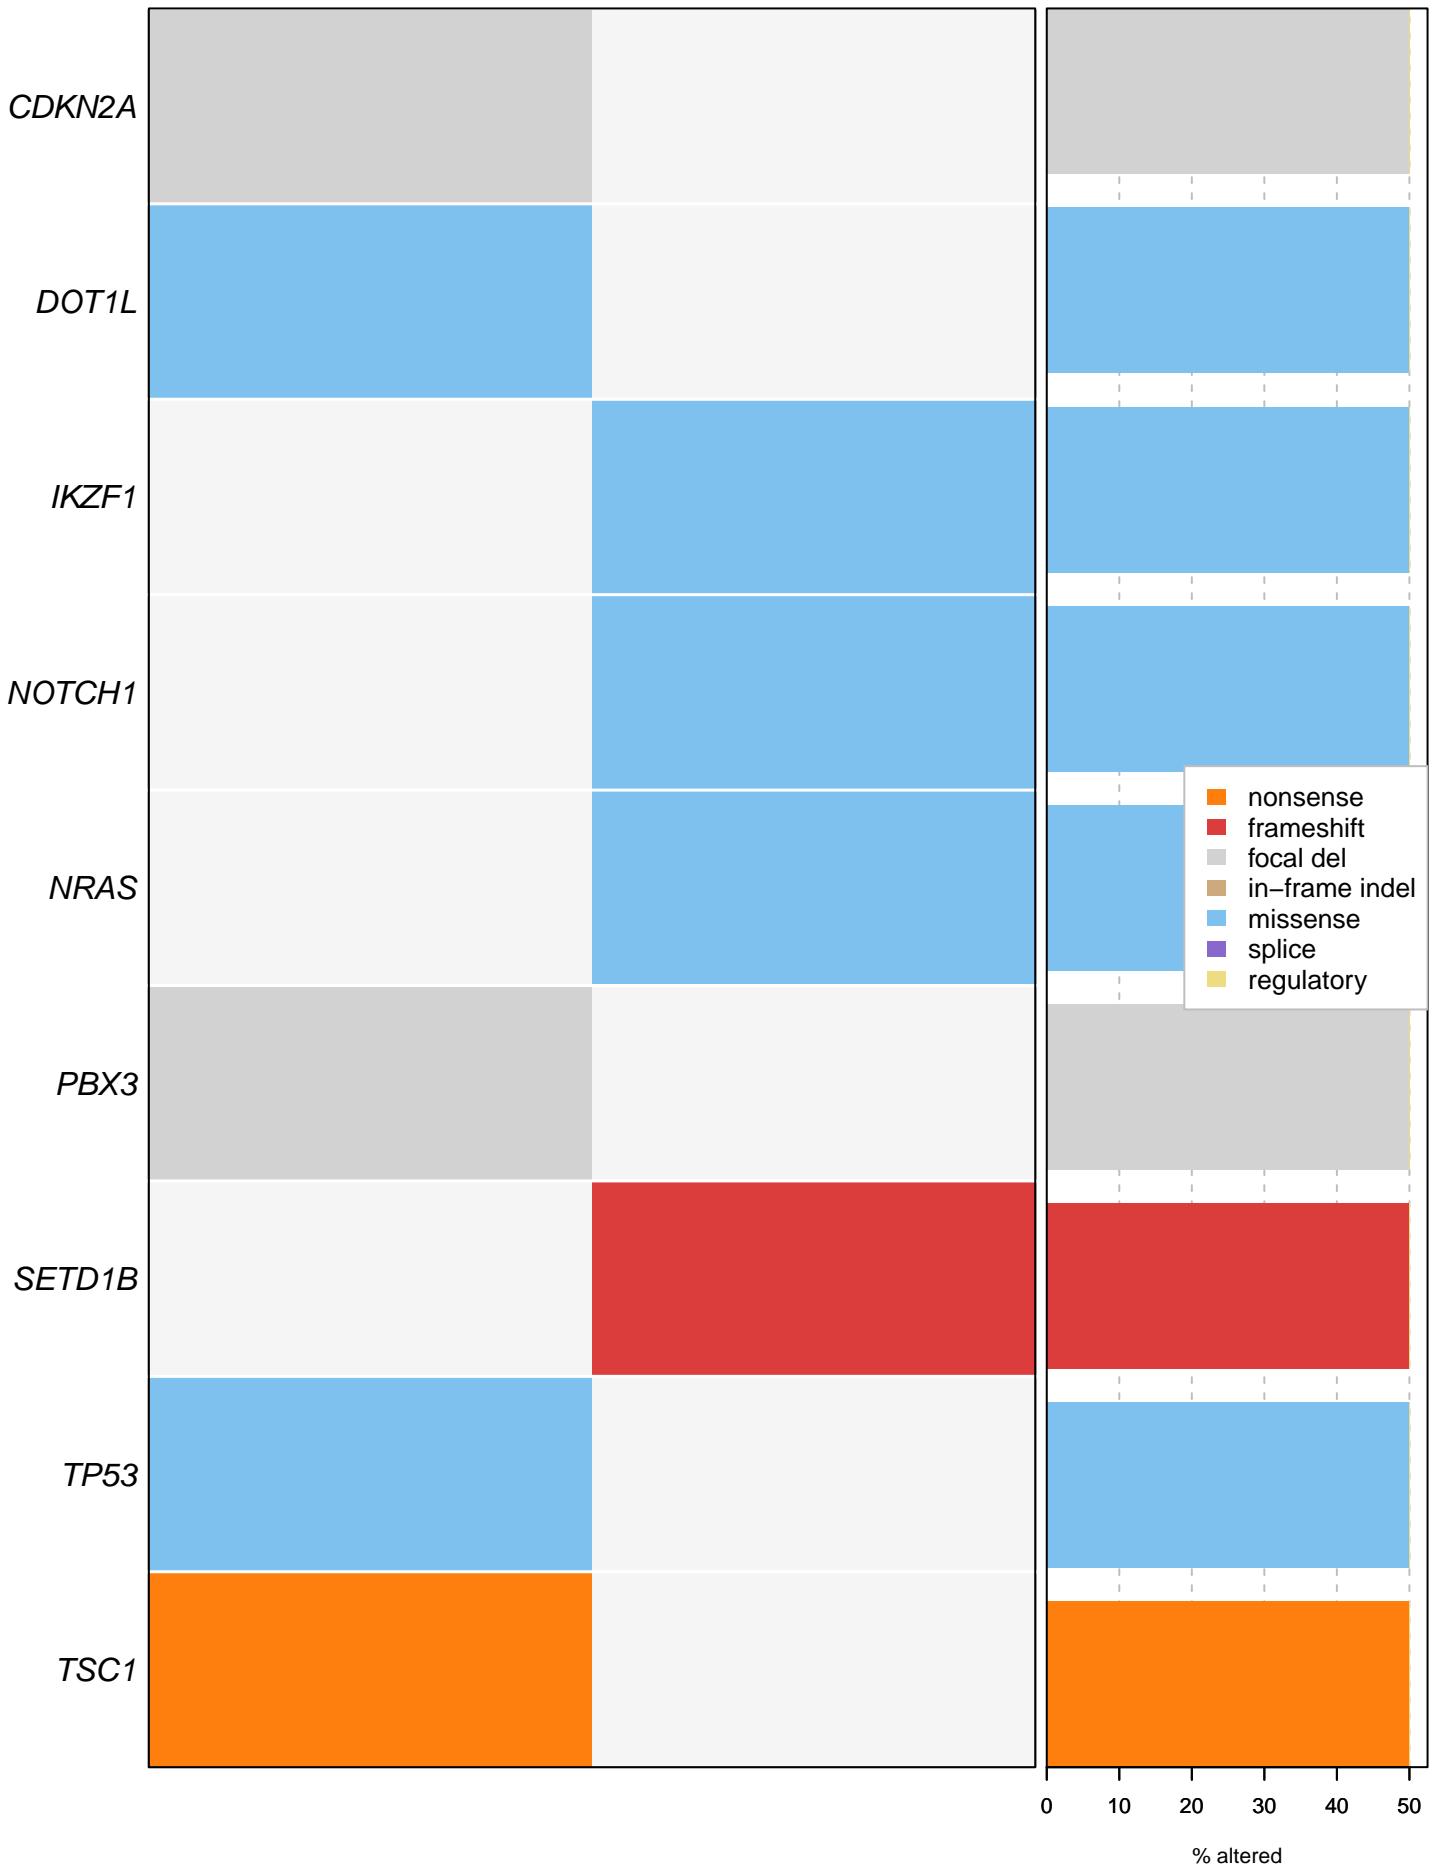



# T-other (n=63) T-ALL

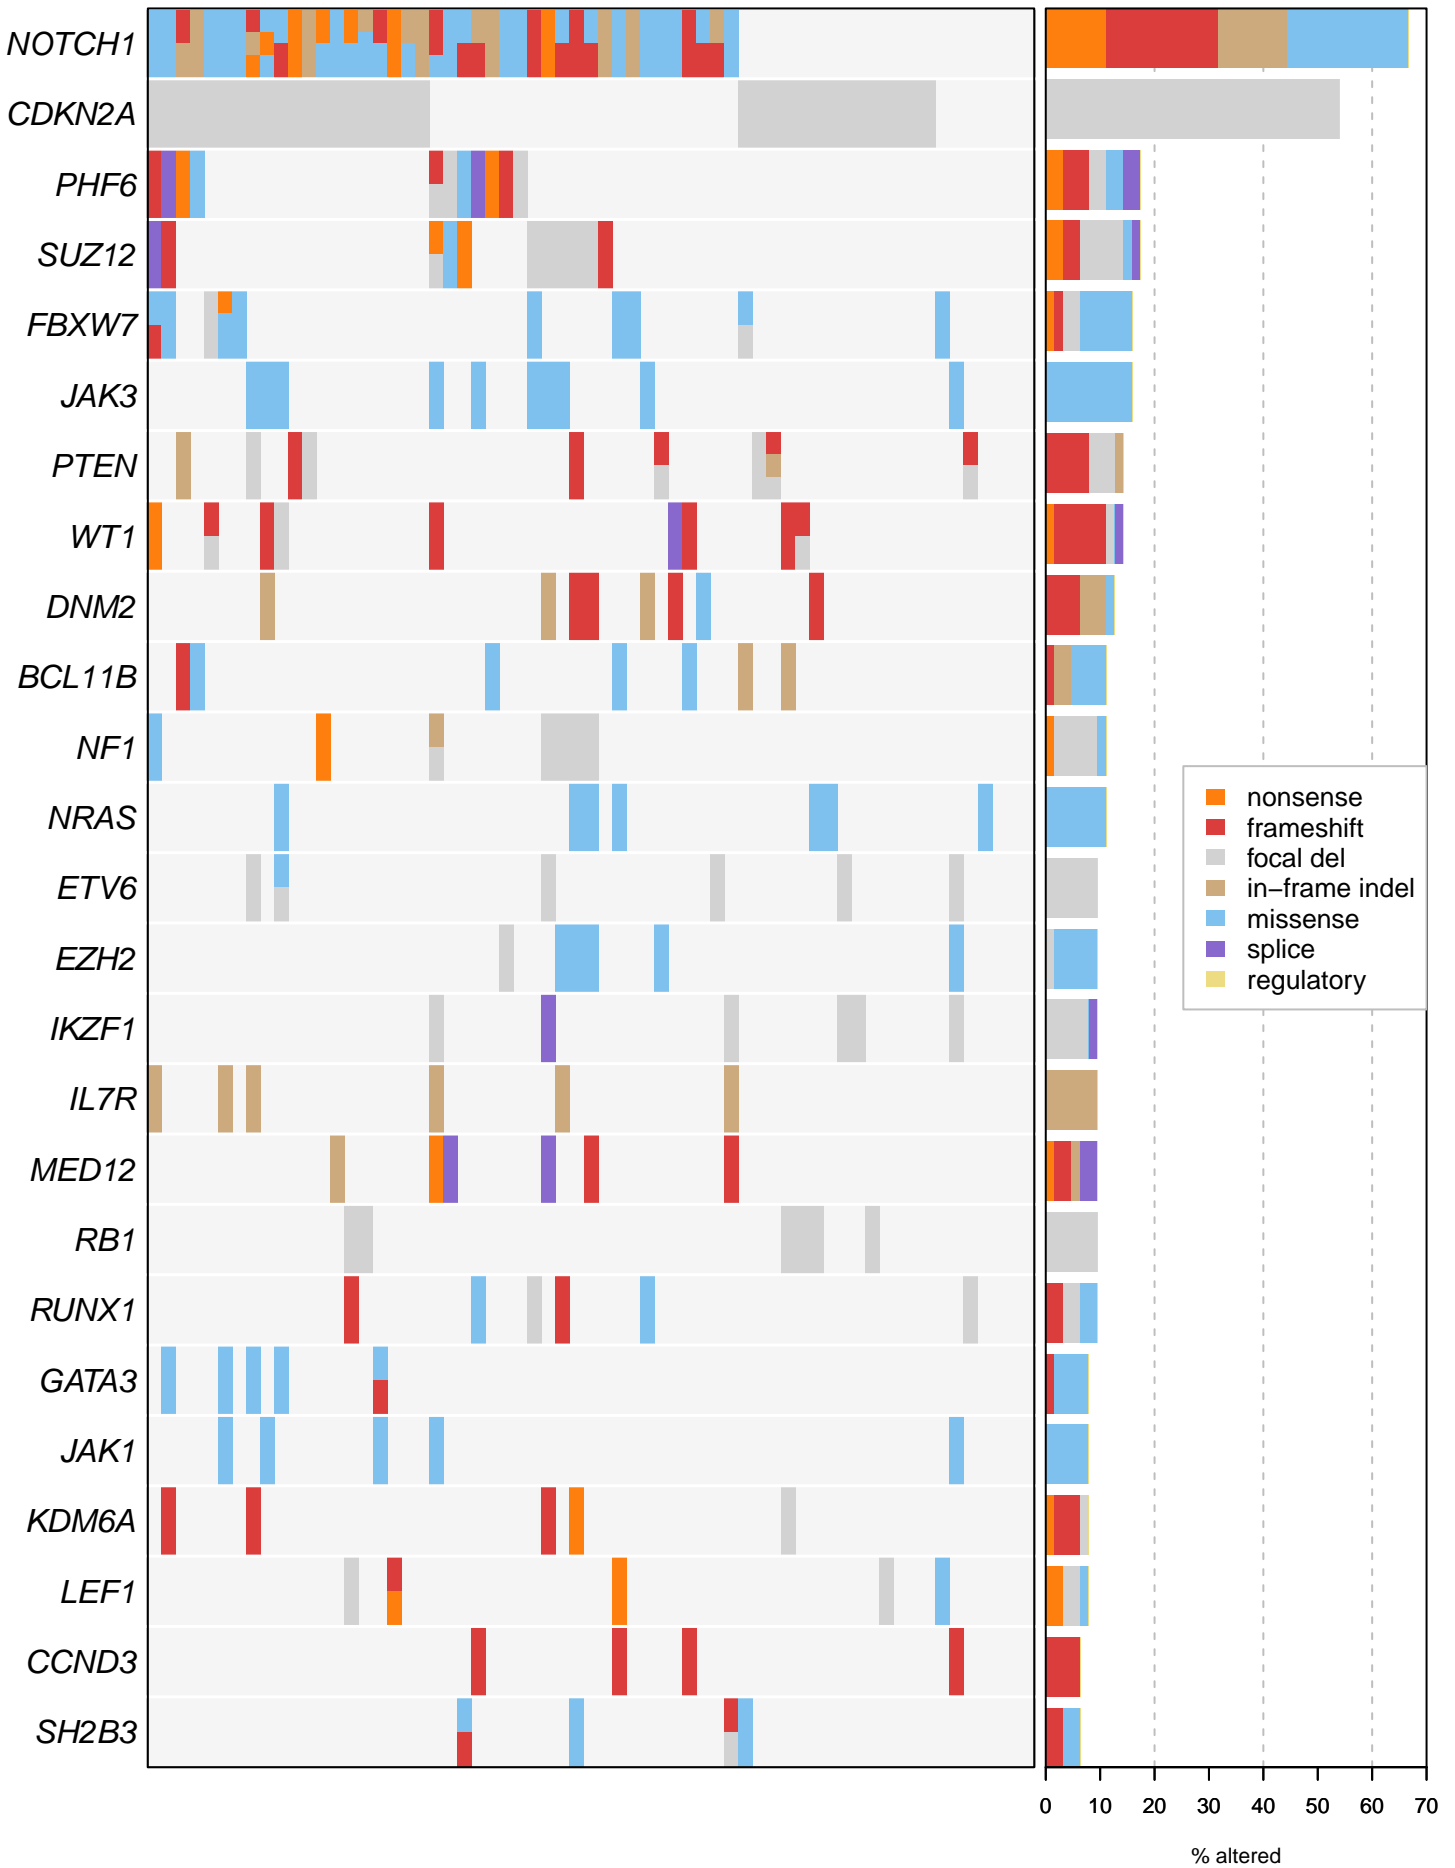

# TAL1 (n=117) T-ALL

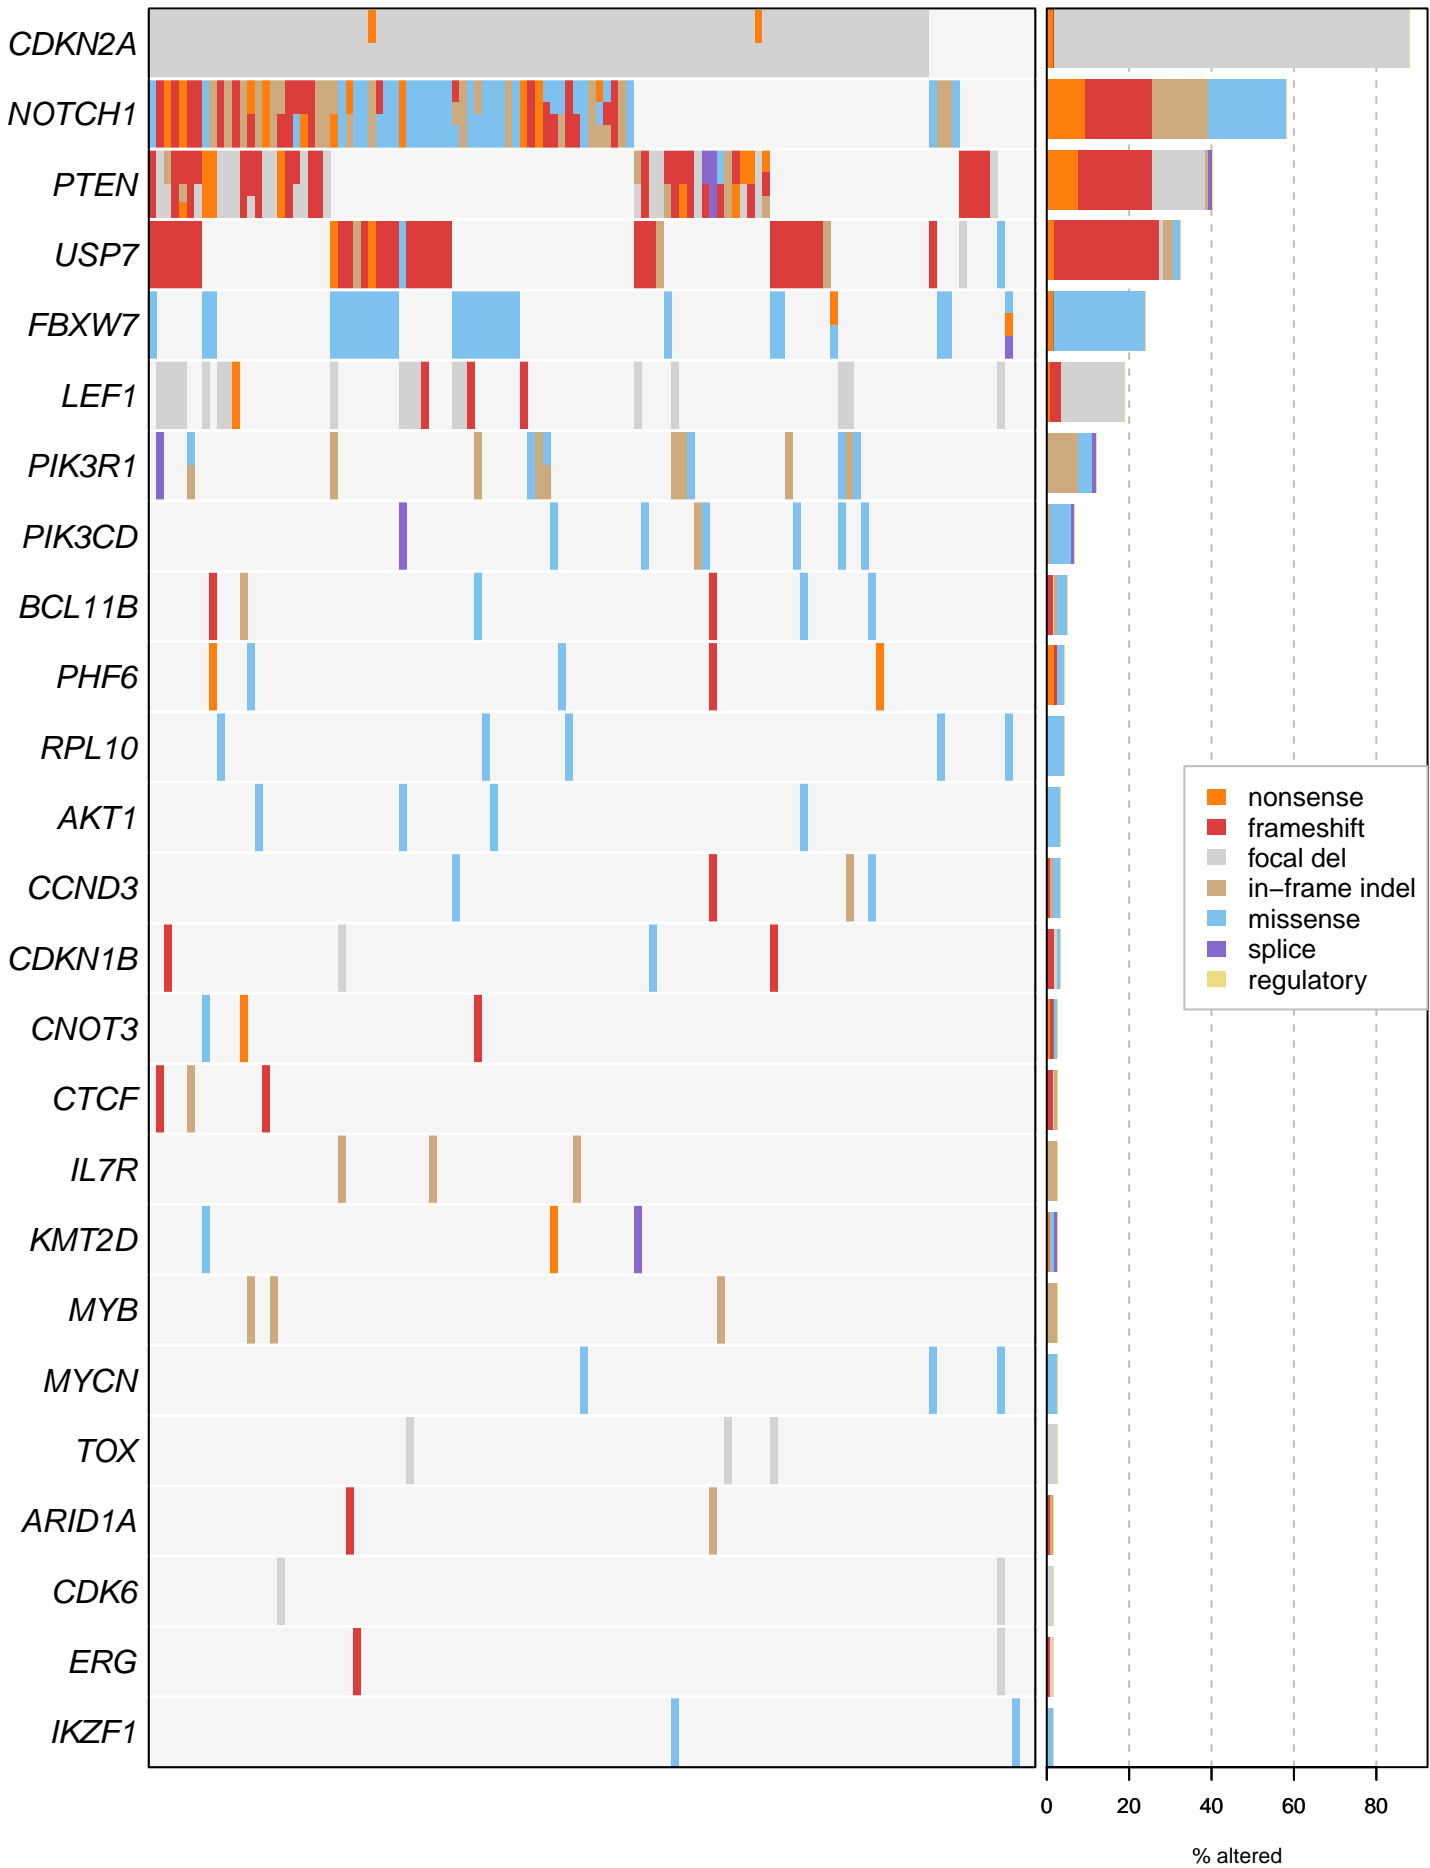

# TAL2 (n=8) T-ALL

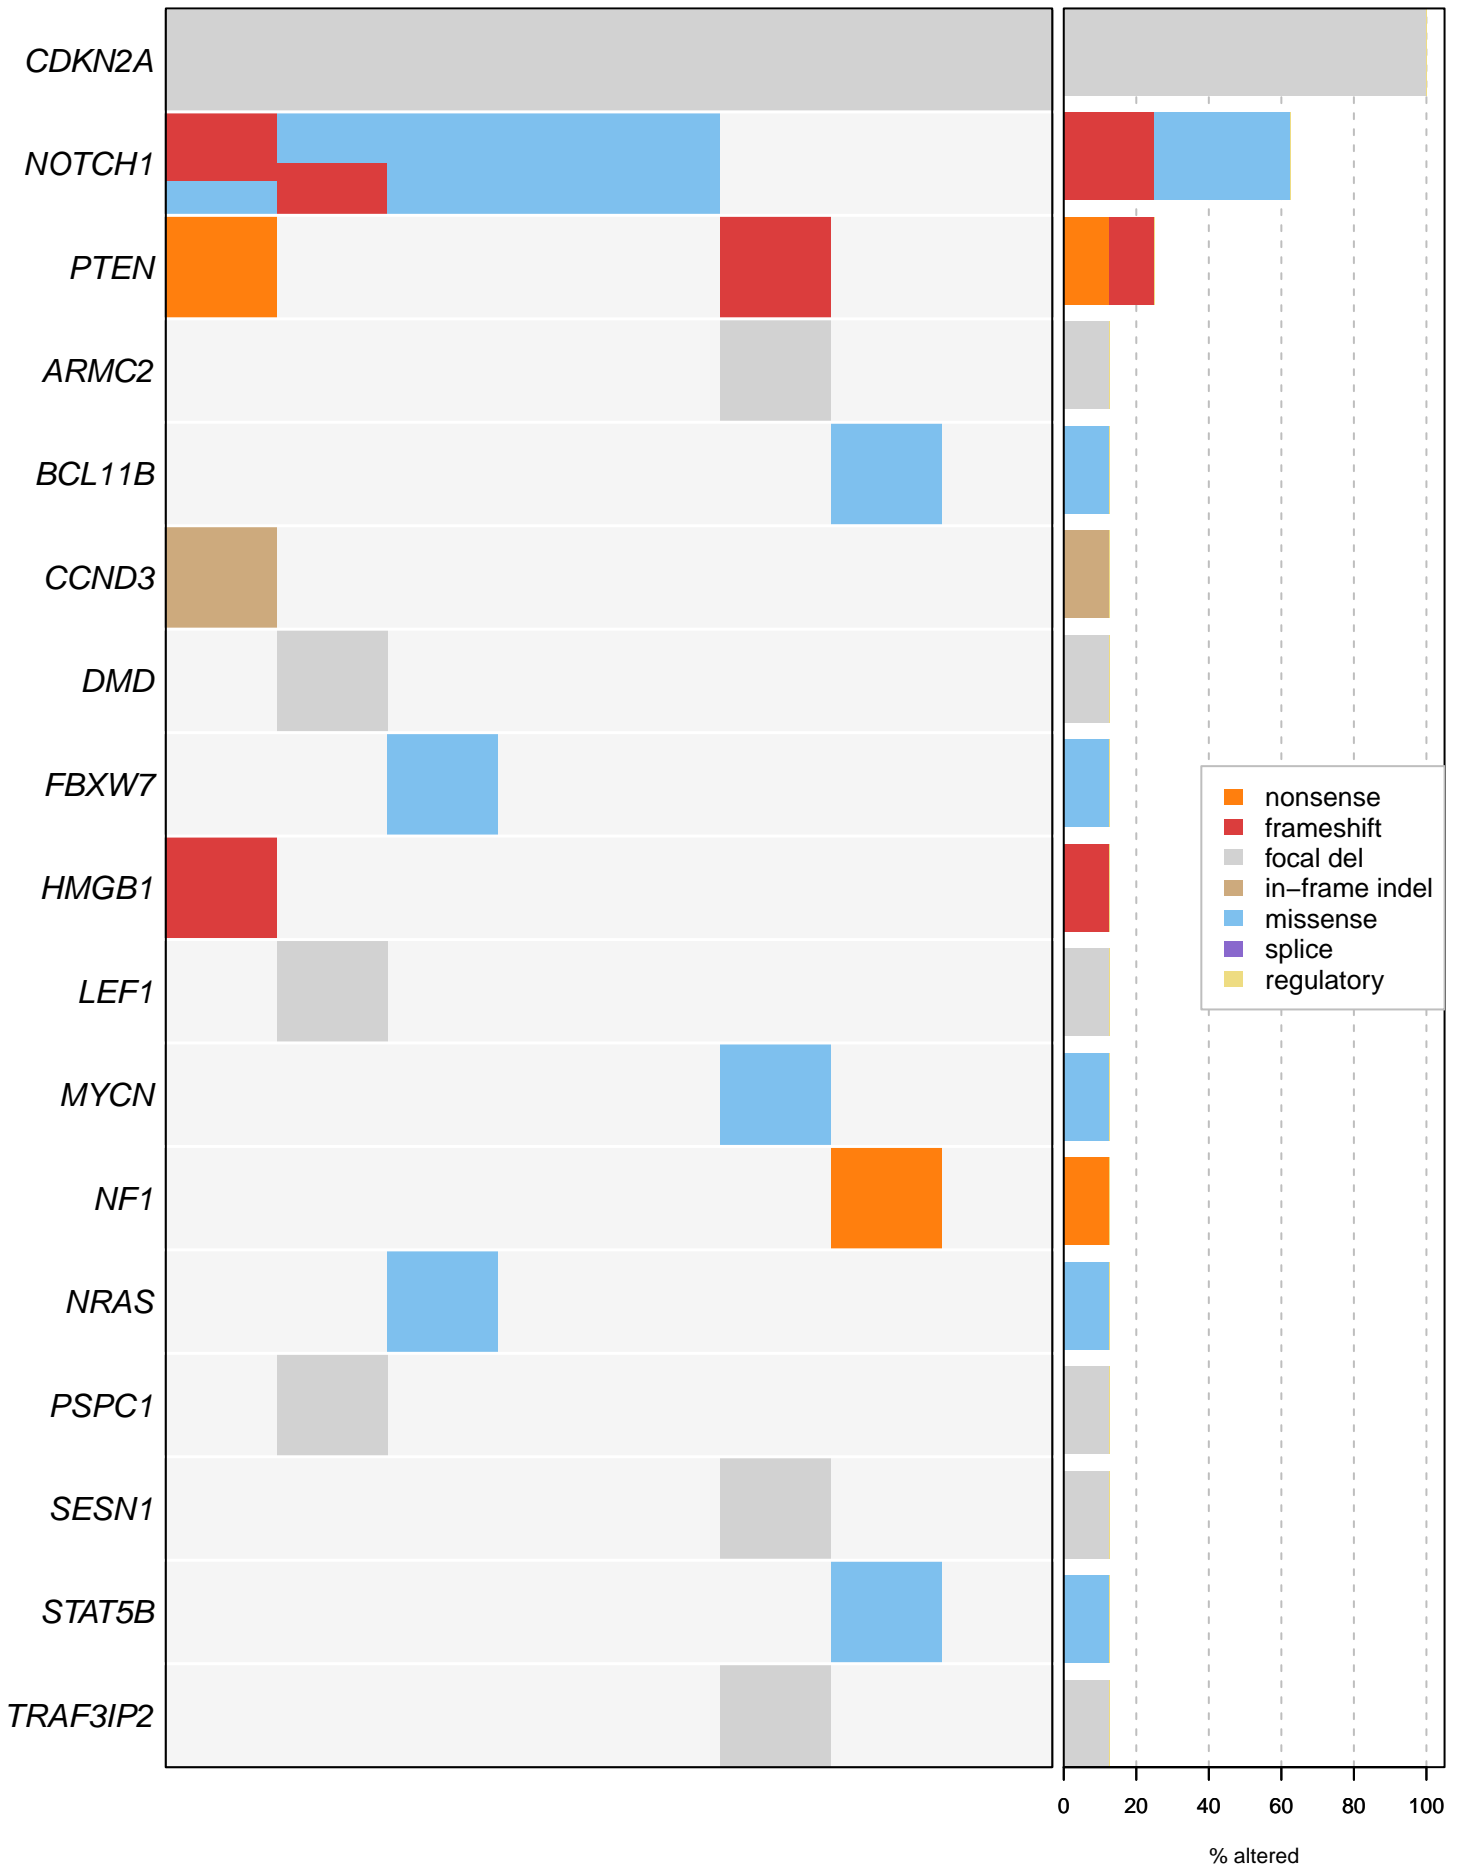

# TCF3-PBX1 (n=87) B-ALL

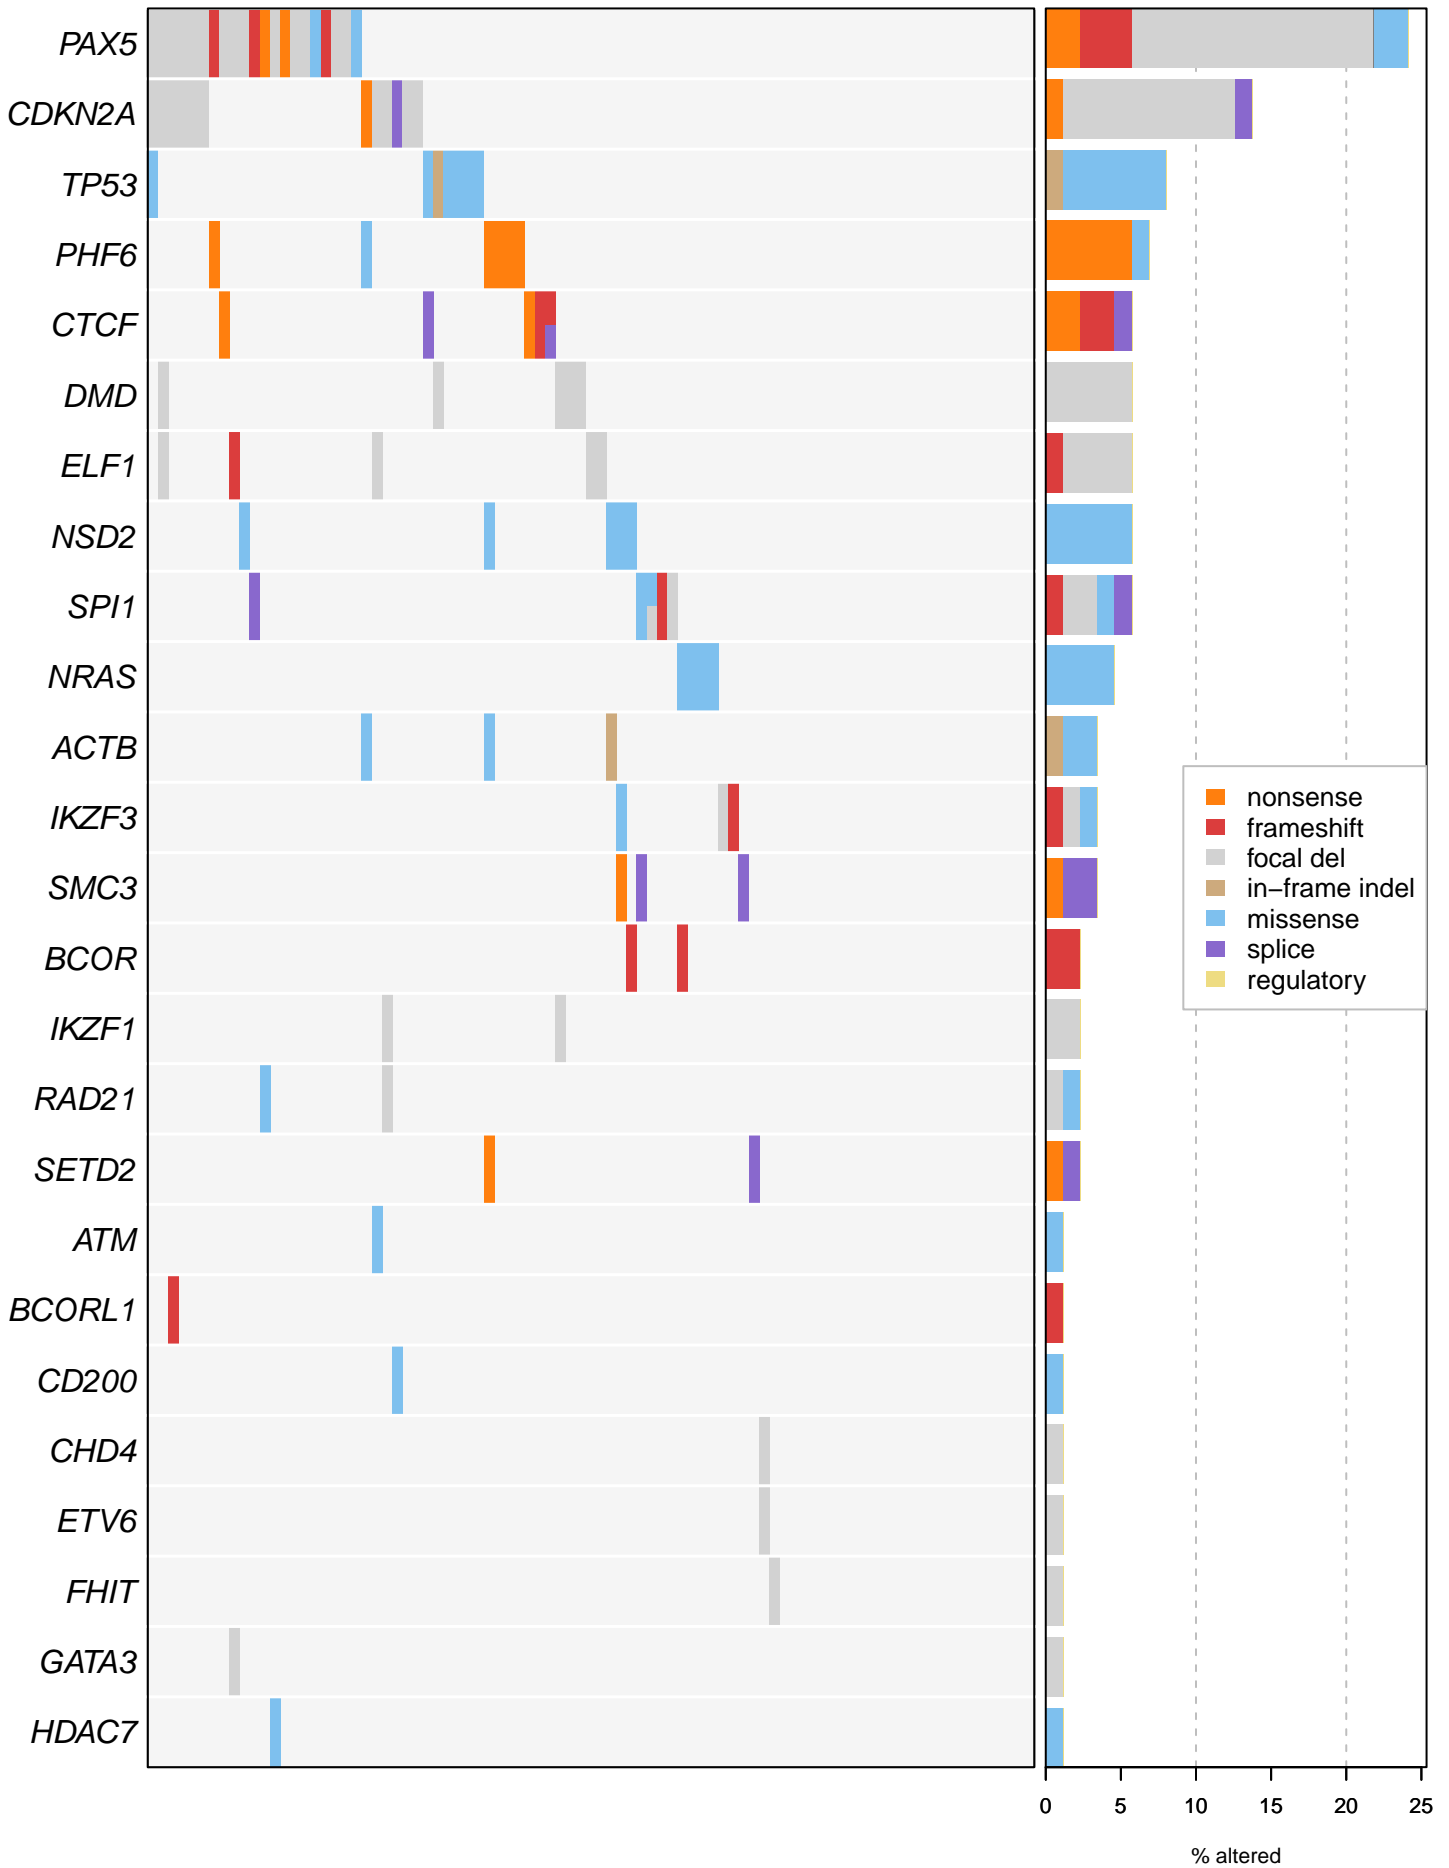

# TLX1 (n=30) T-ALL

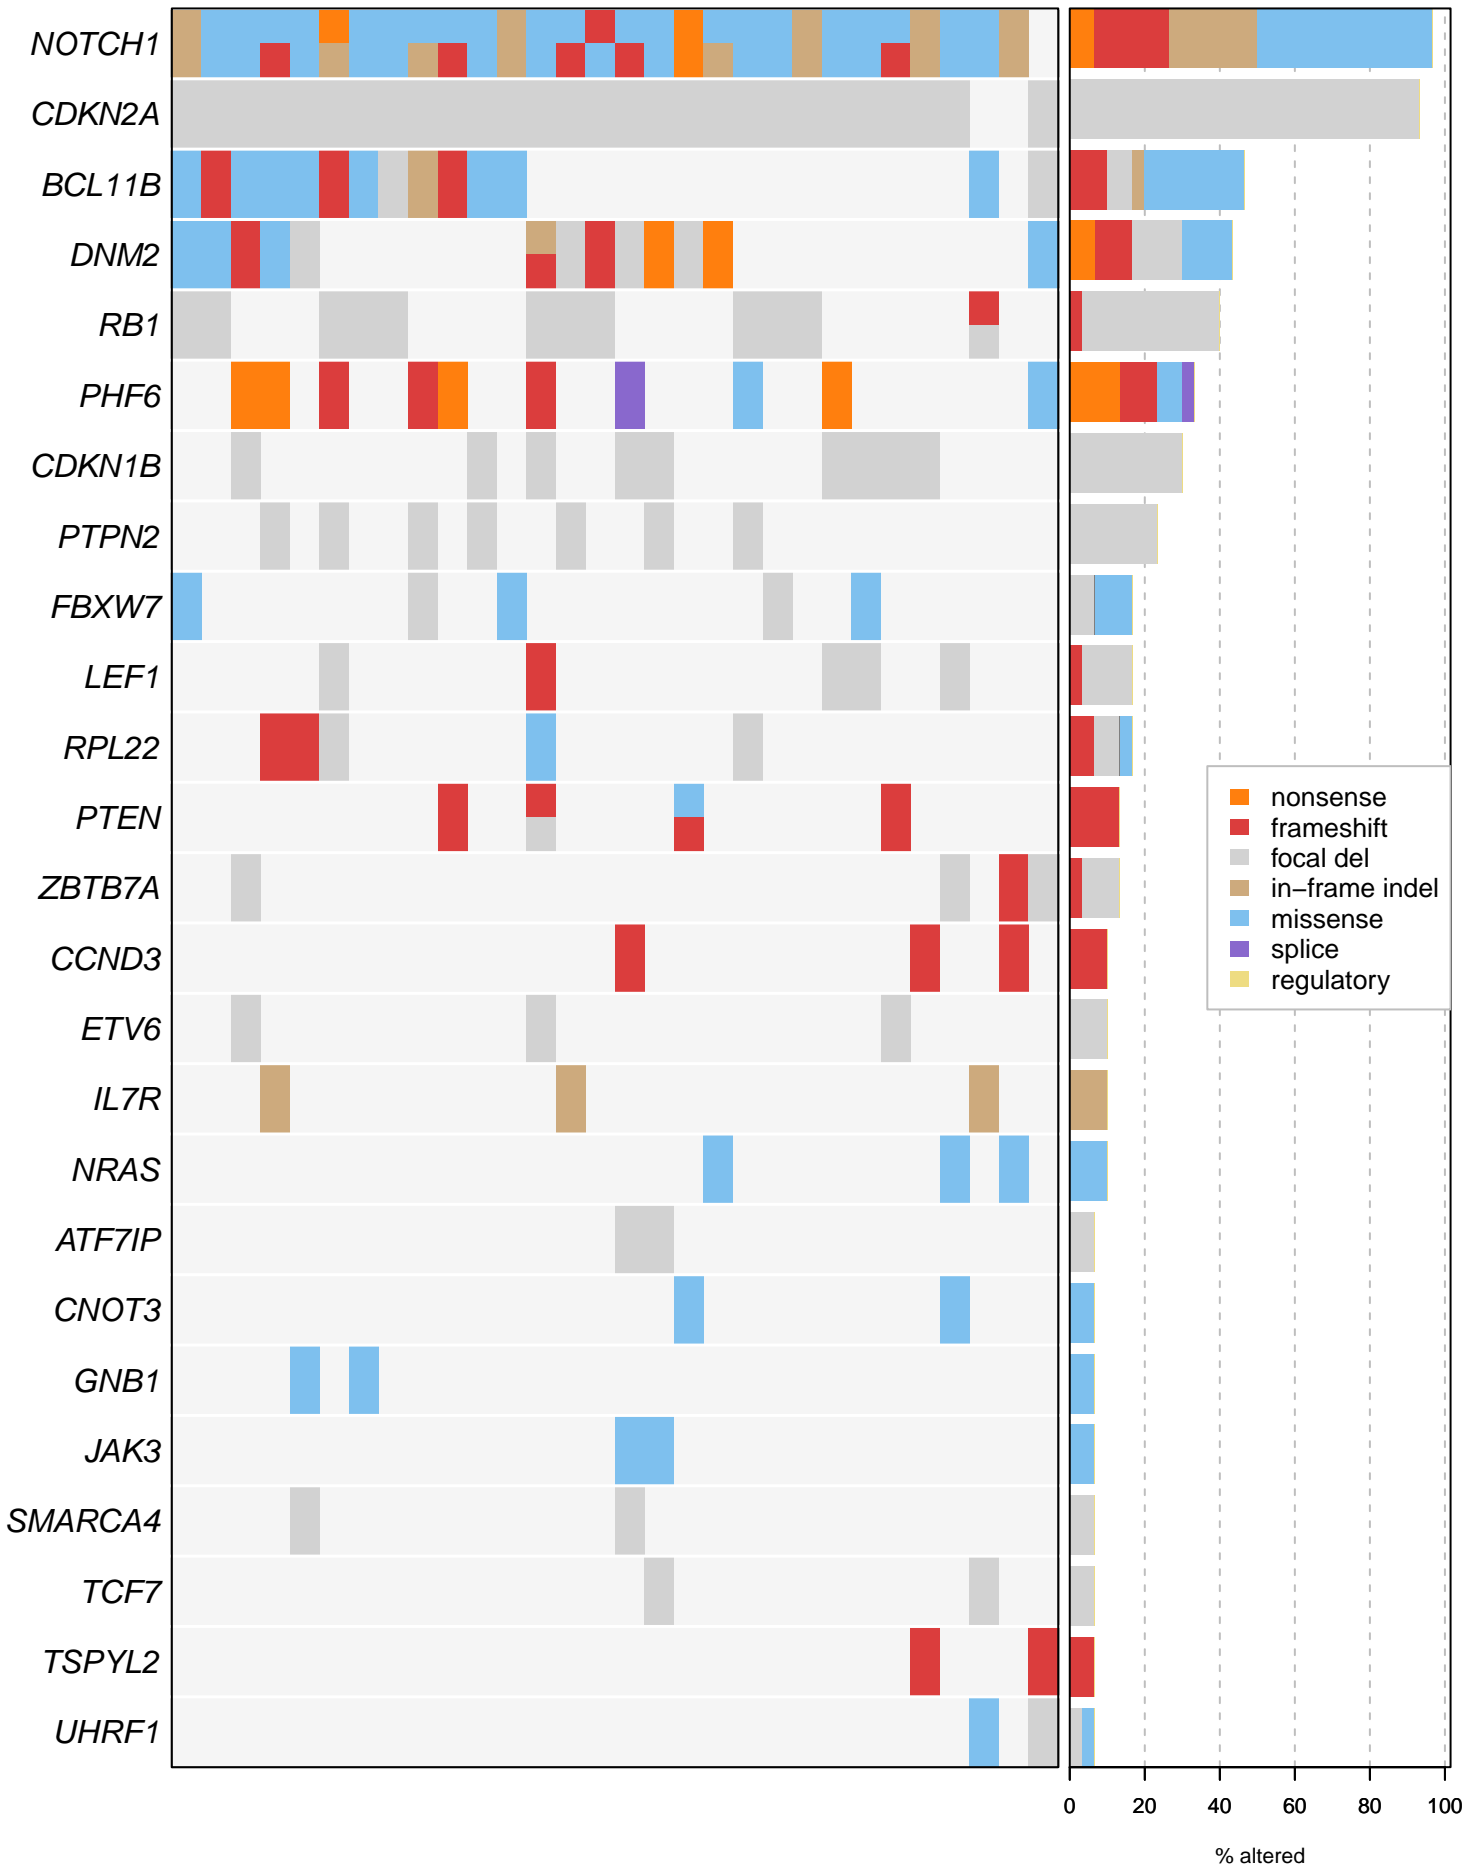

# TLX3 (n=57) T-ALL

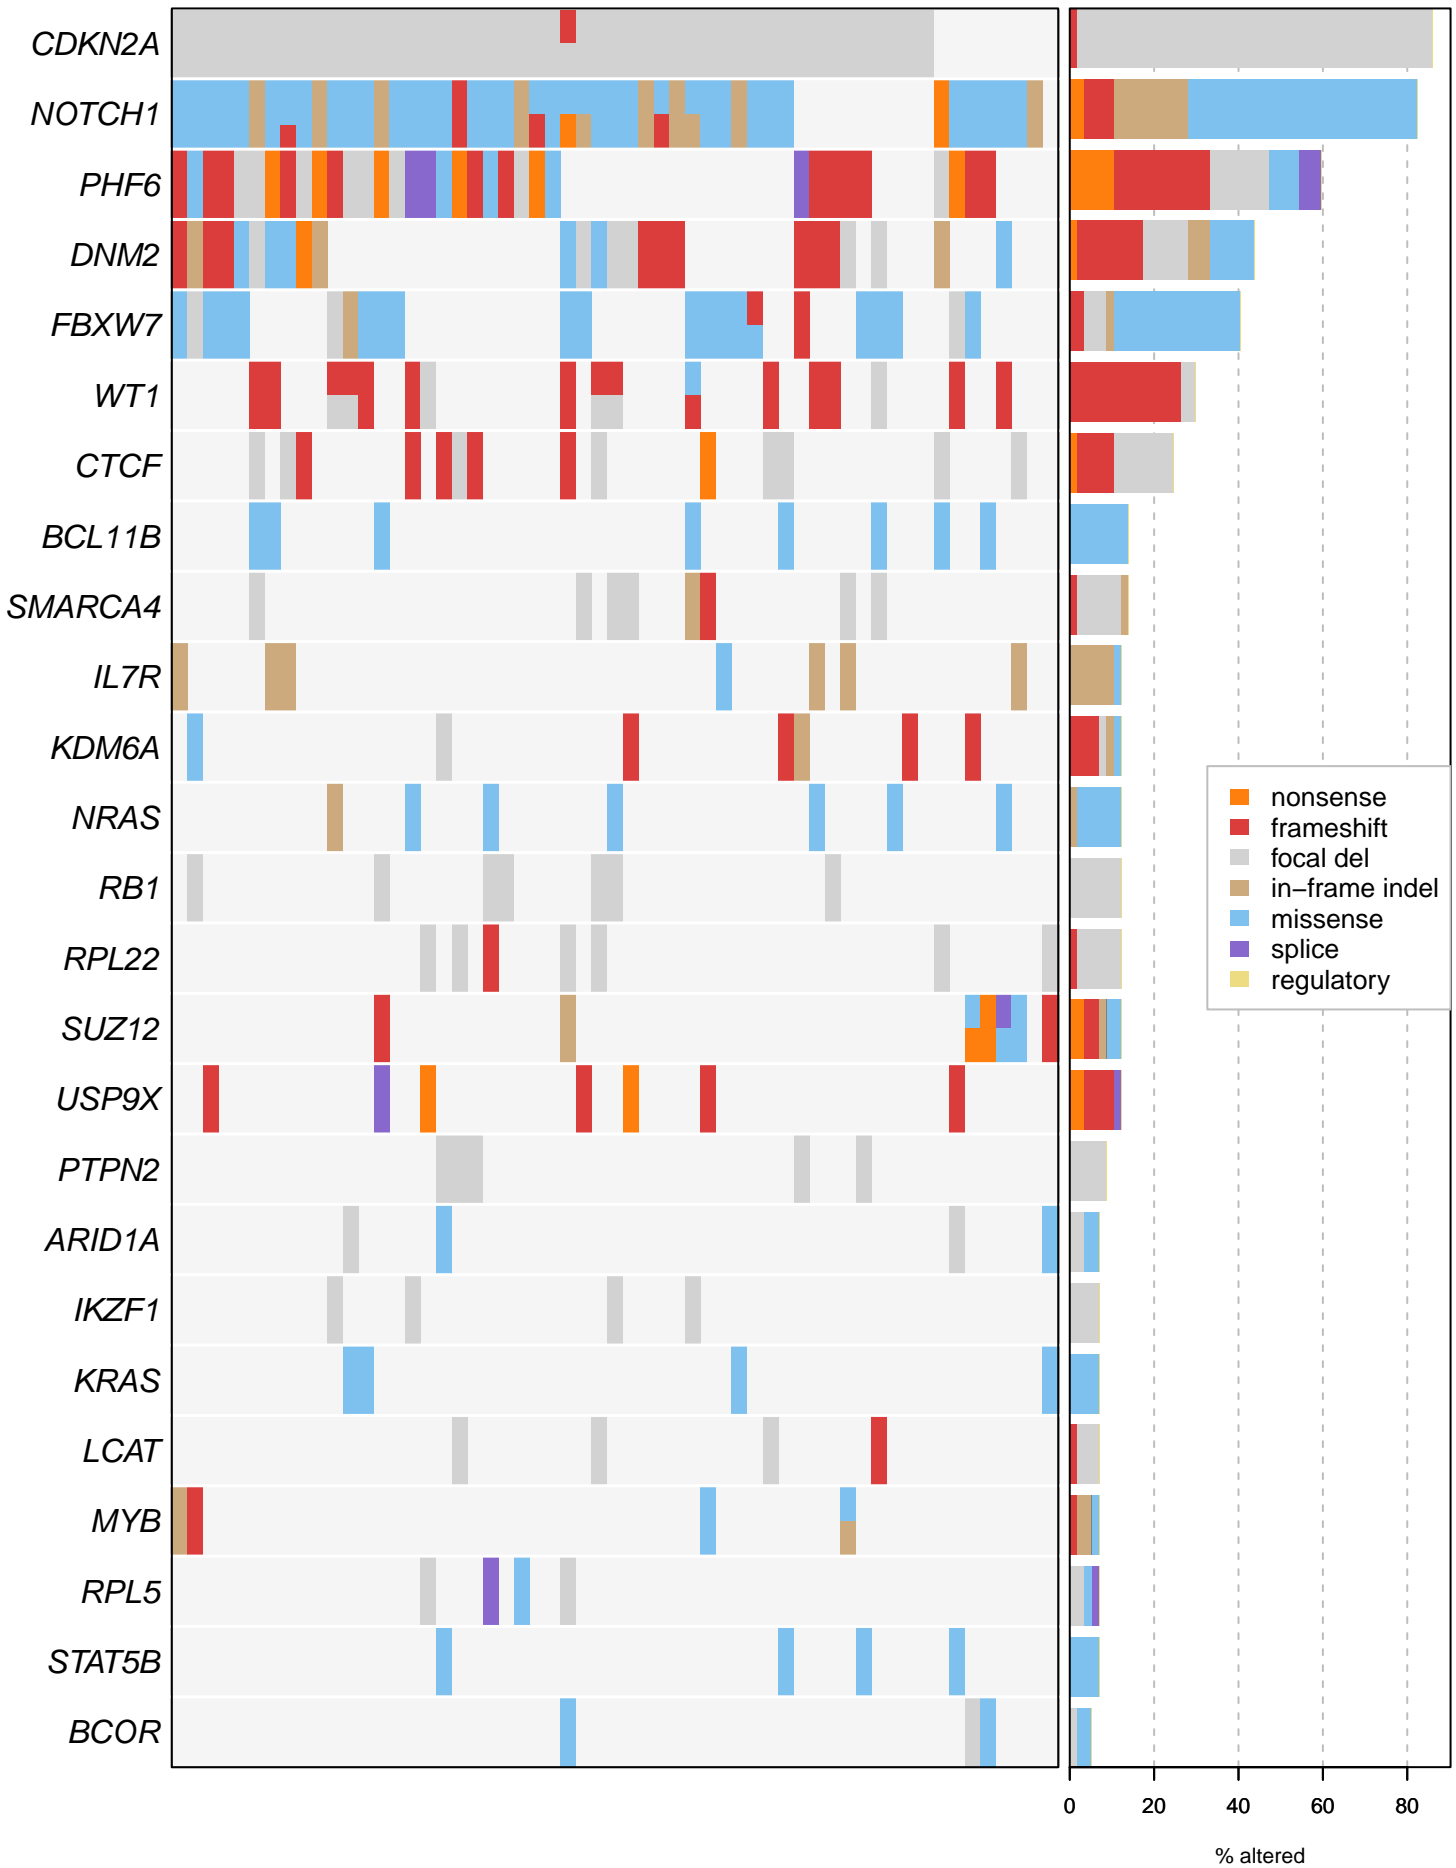

# ZEB2\_CEBP (n=3) B-ALL

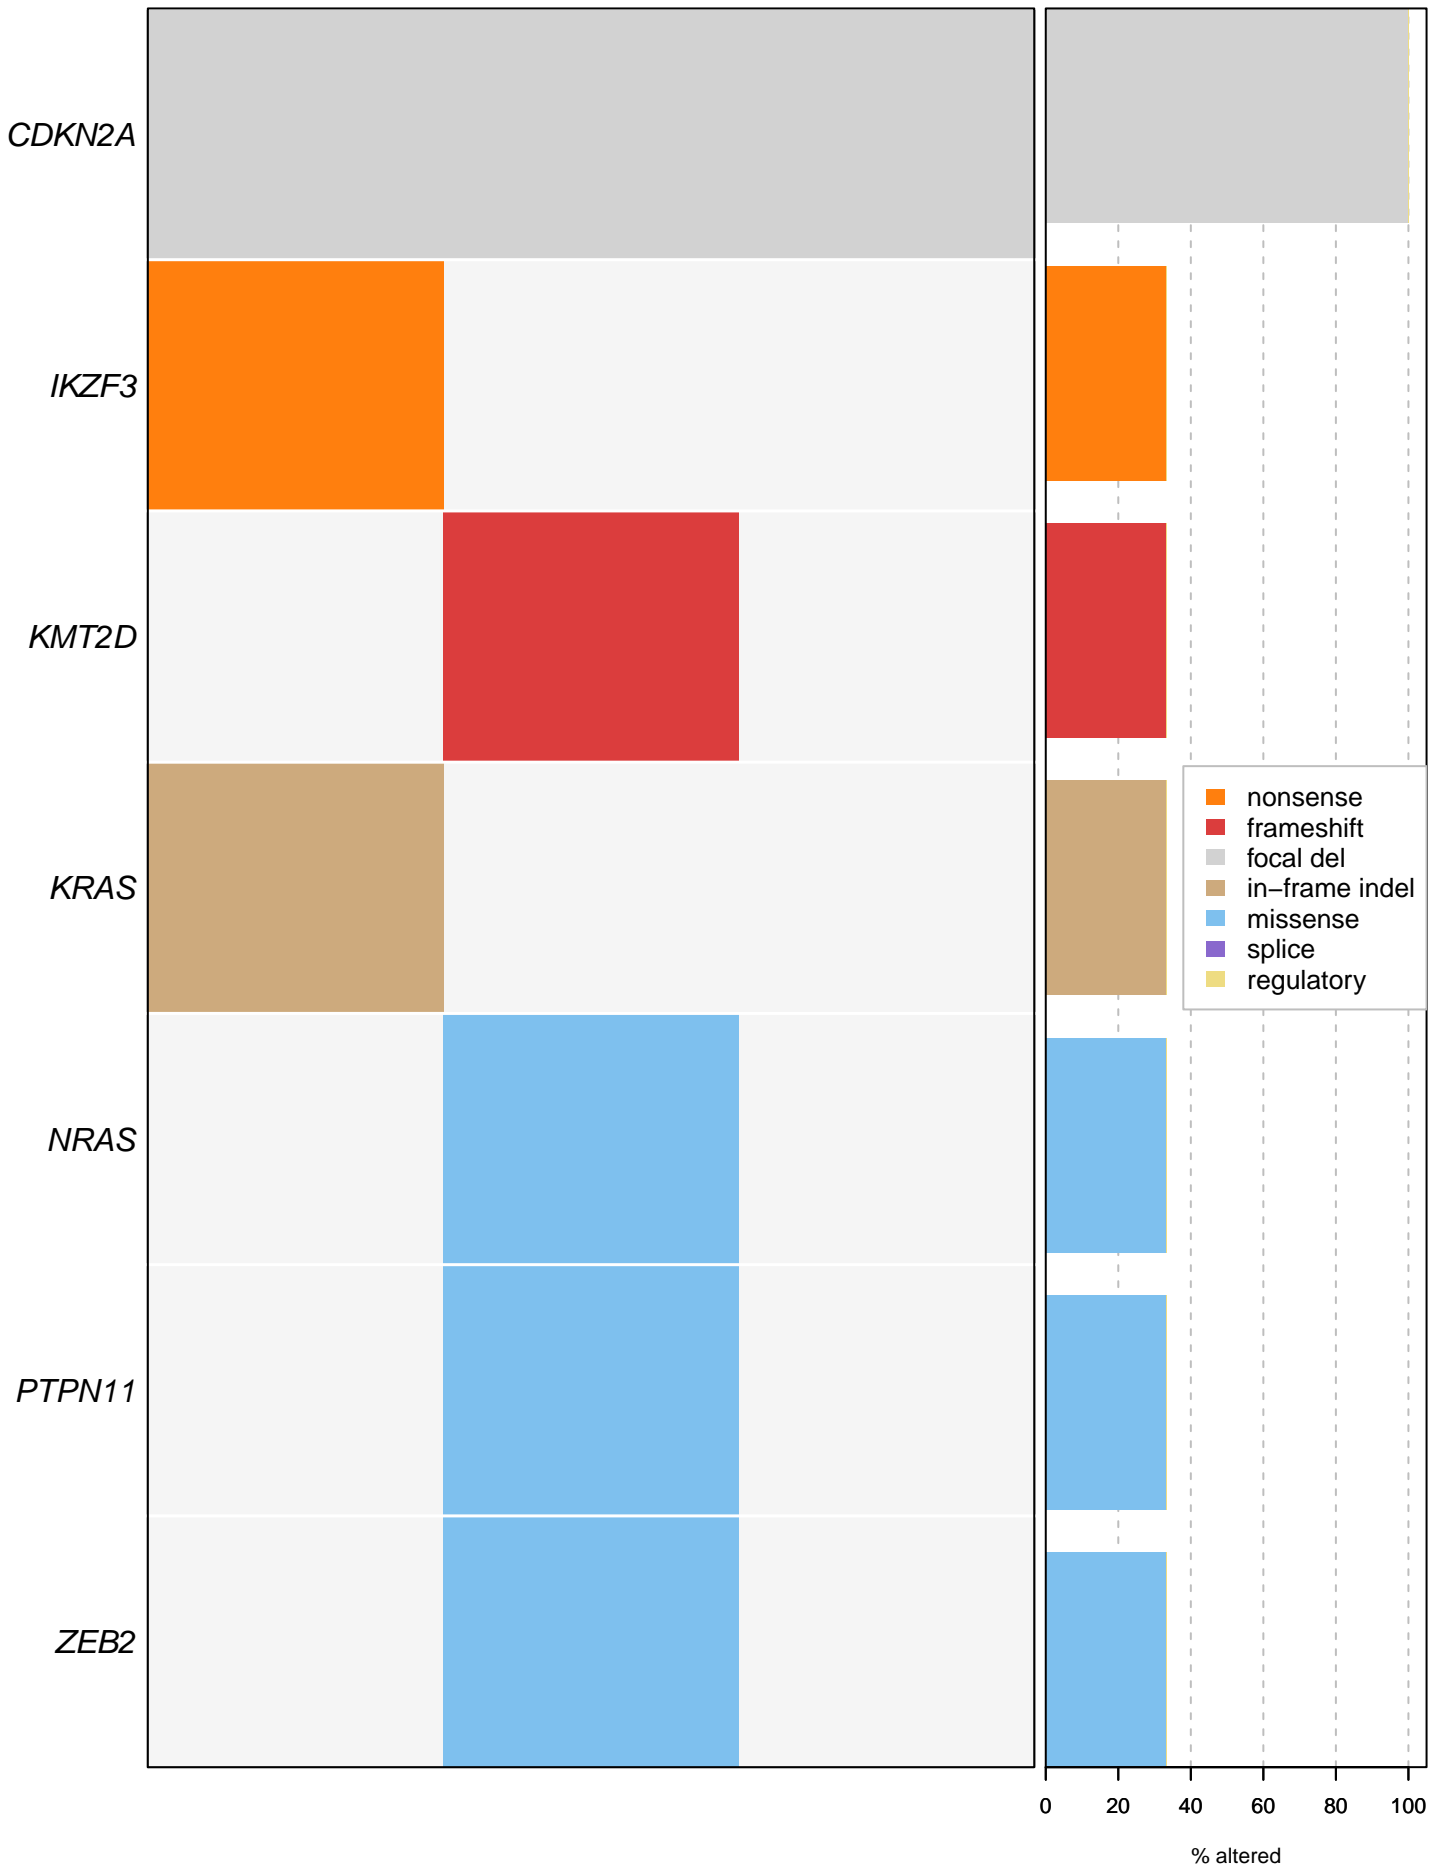

# ZNF384 (n=20) B-ALL

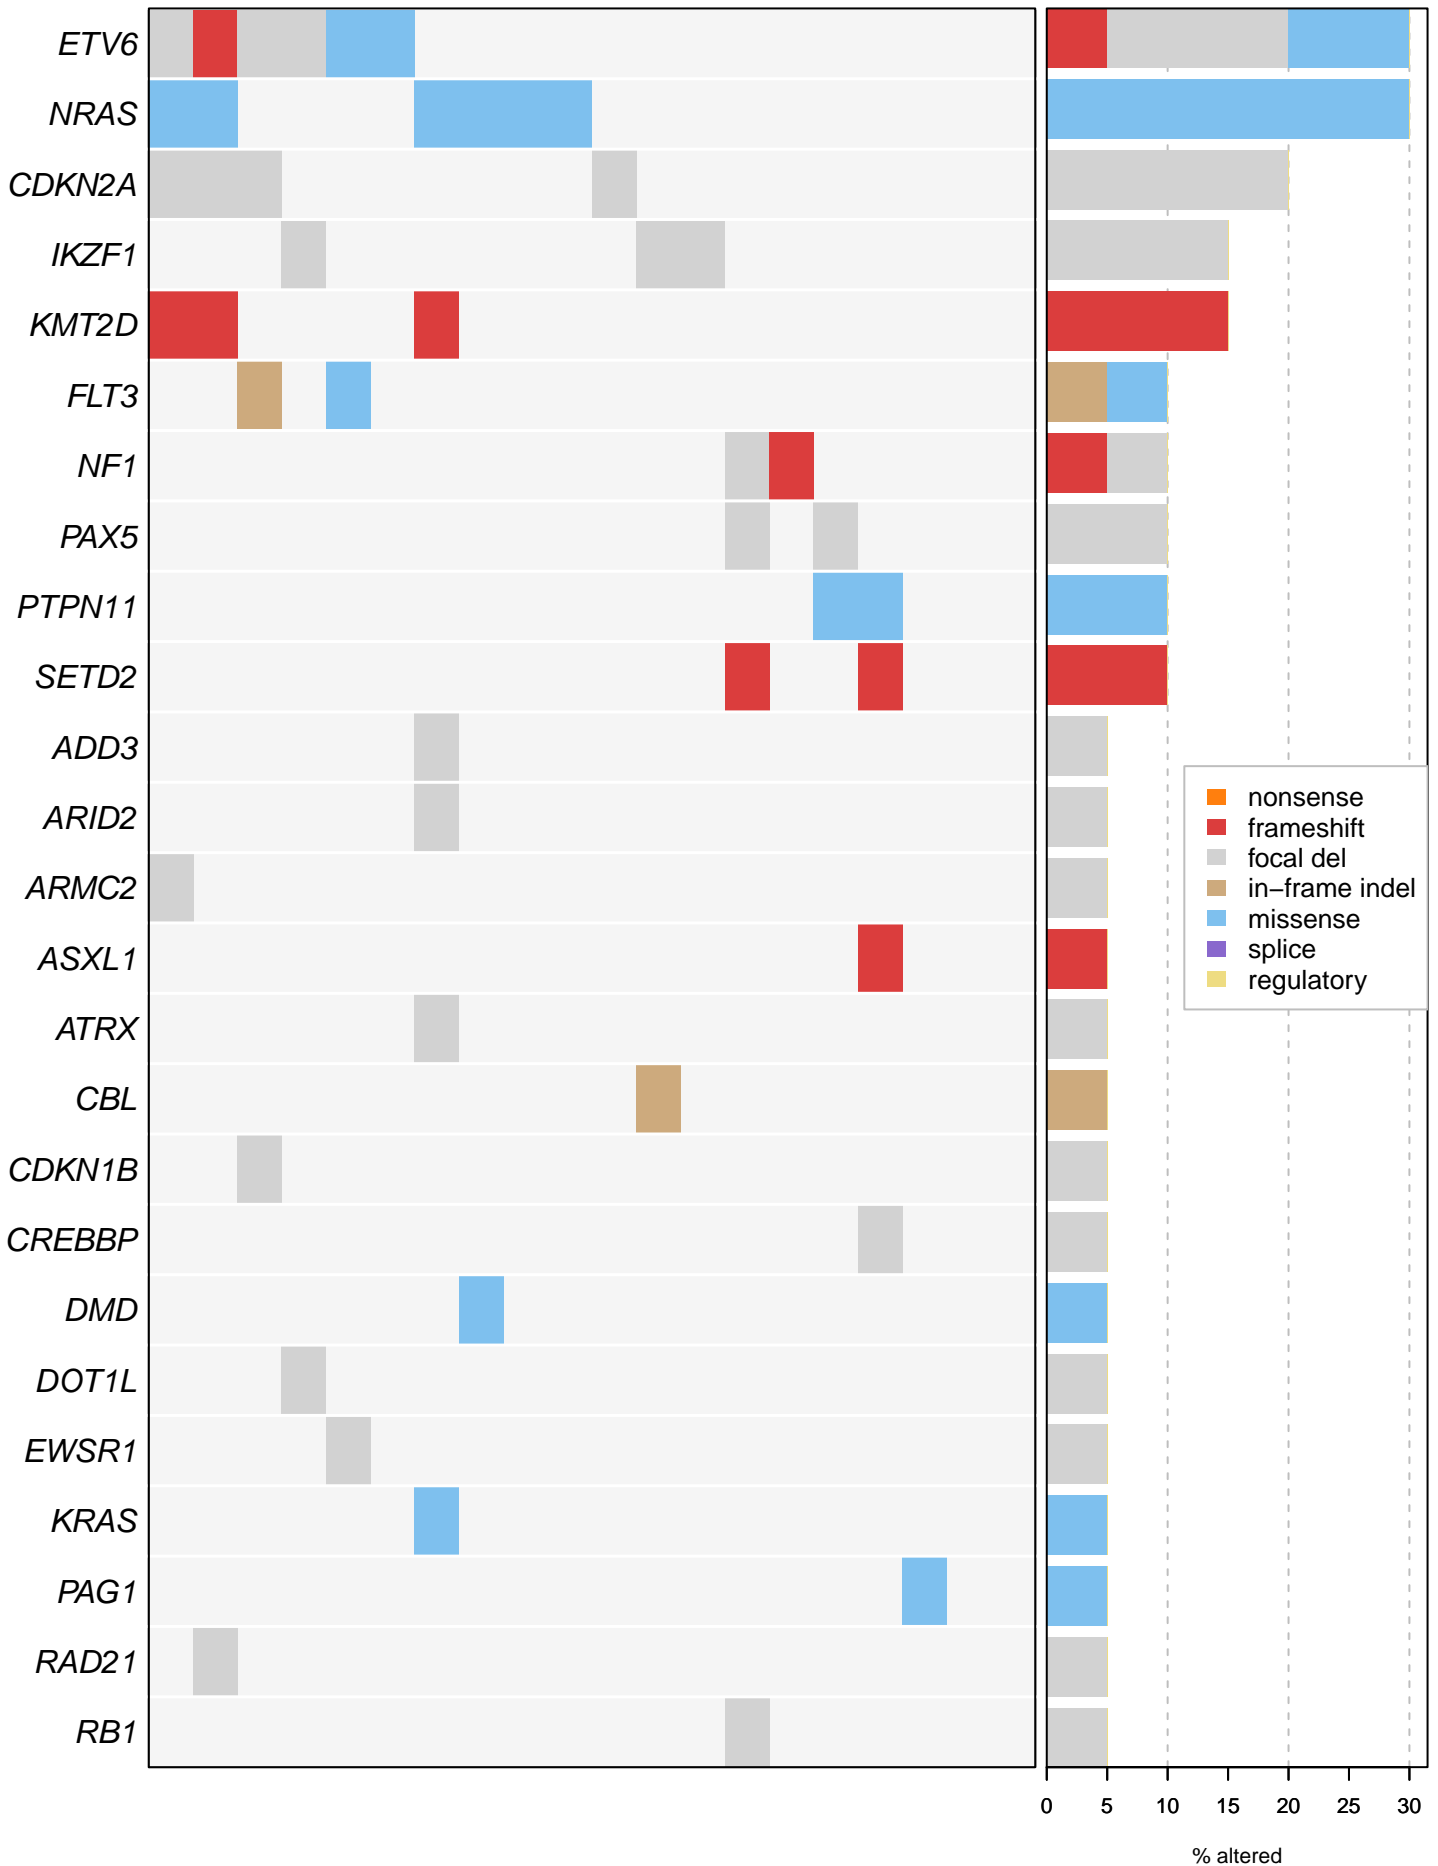

Supplement: NIHMS1848401-supplement-1848401_Sup_Dataset_4.pdf [file NIHMS1848401-supplement-1848401_Sup_Dataset_4.pdf]
