# Supplementary material
Source: PubMed Central journal article supplement (PMC9700506)

# Supplementary Dataset 8

## Somatic alterations associated with event-free survival within subtypes

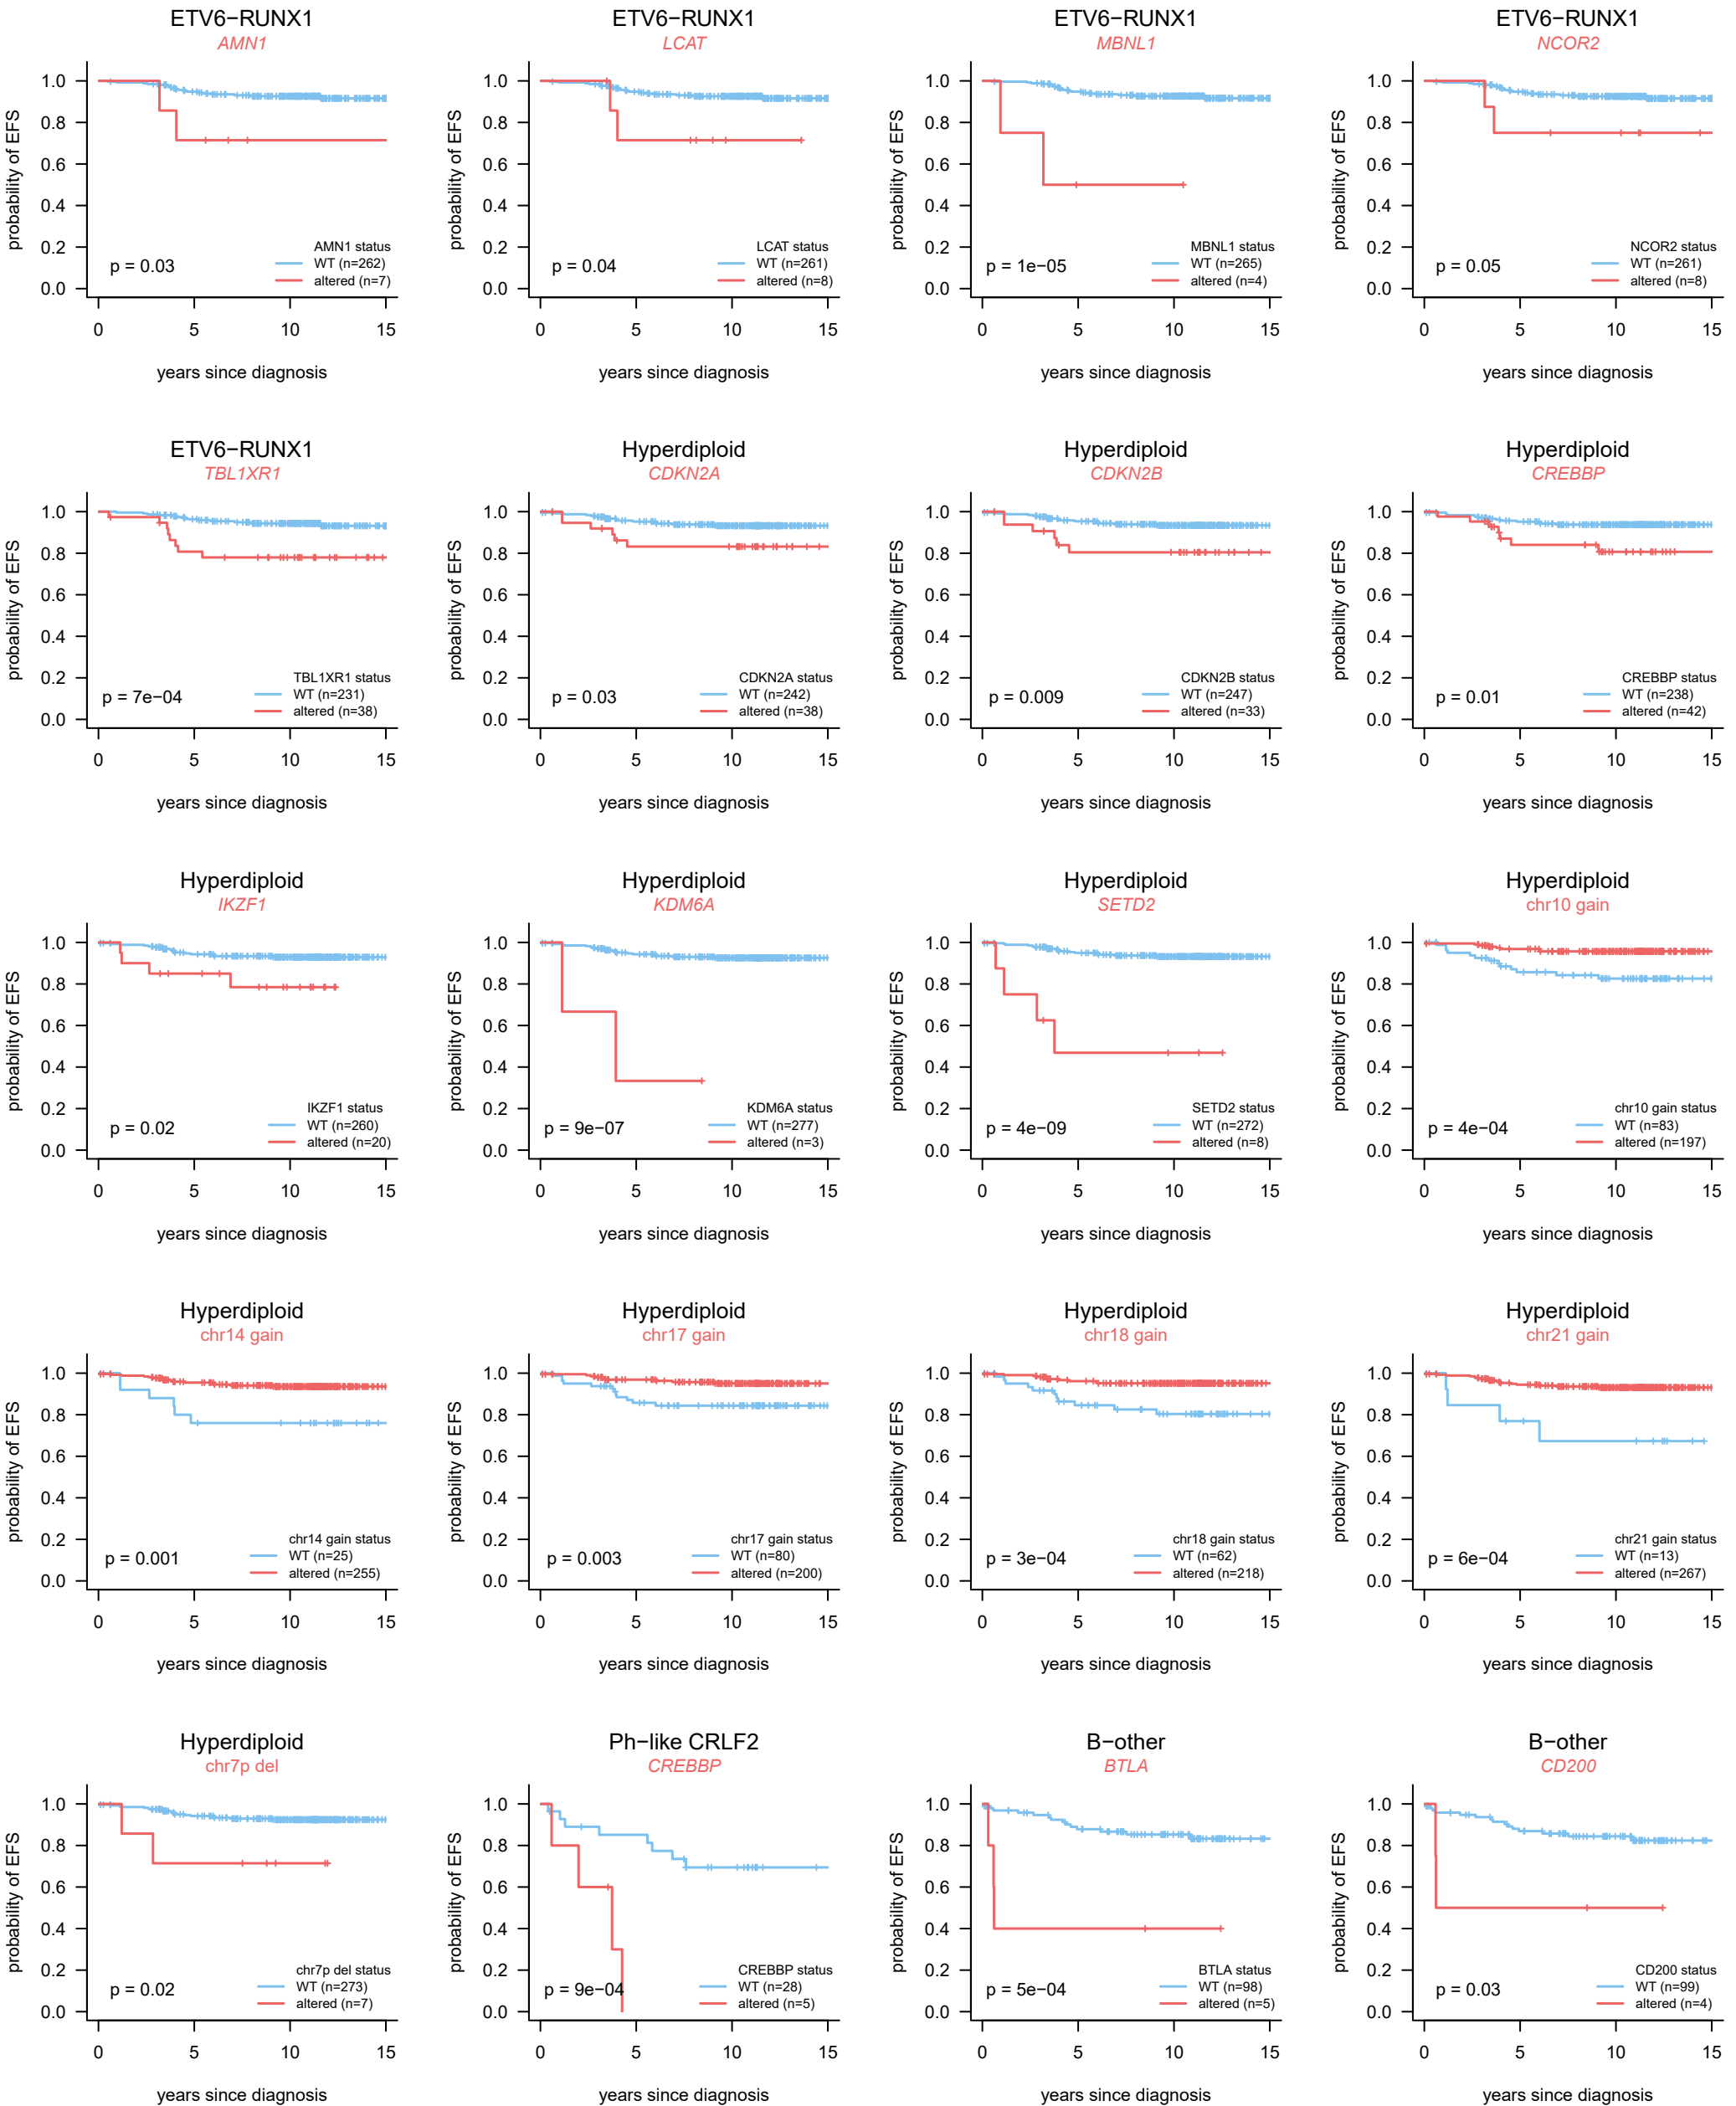

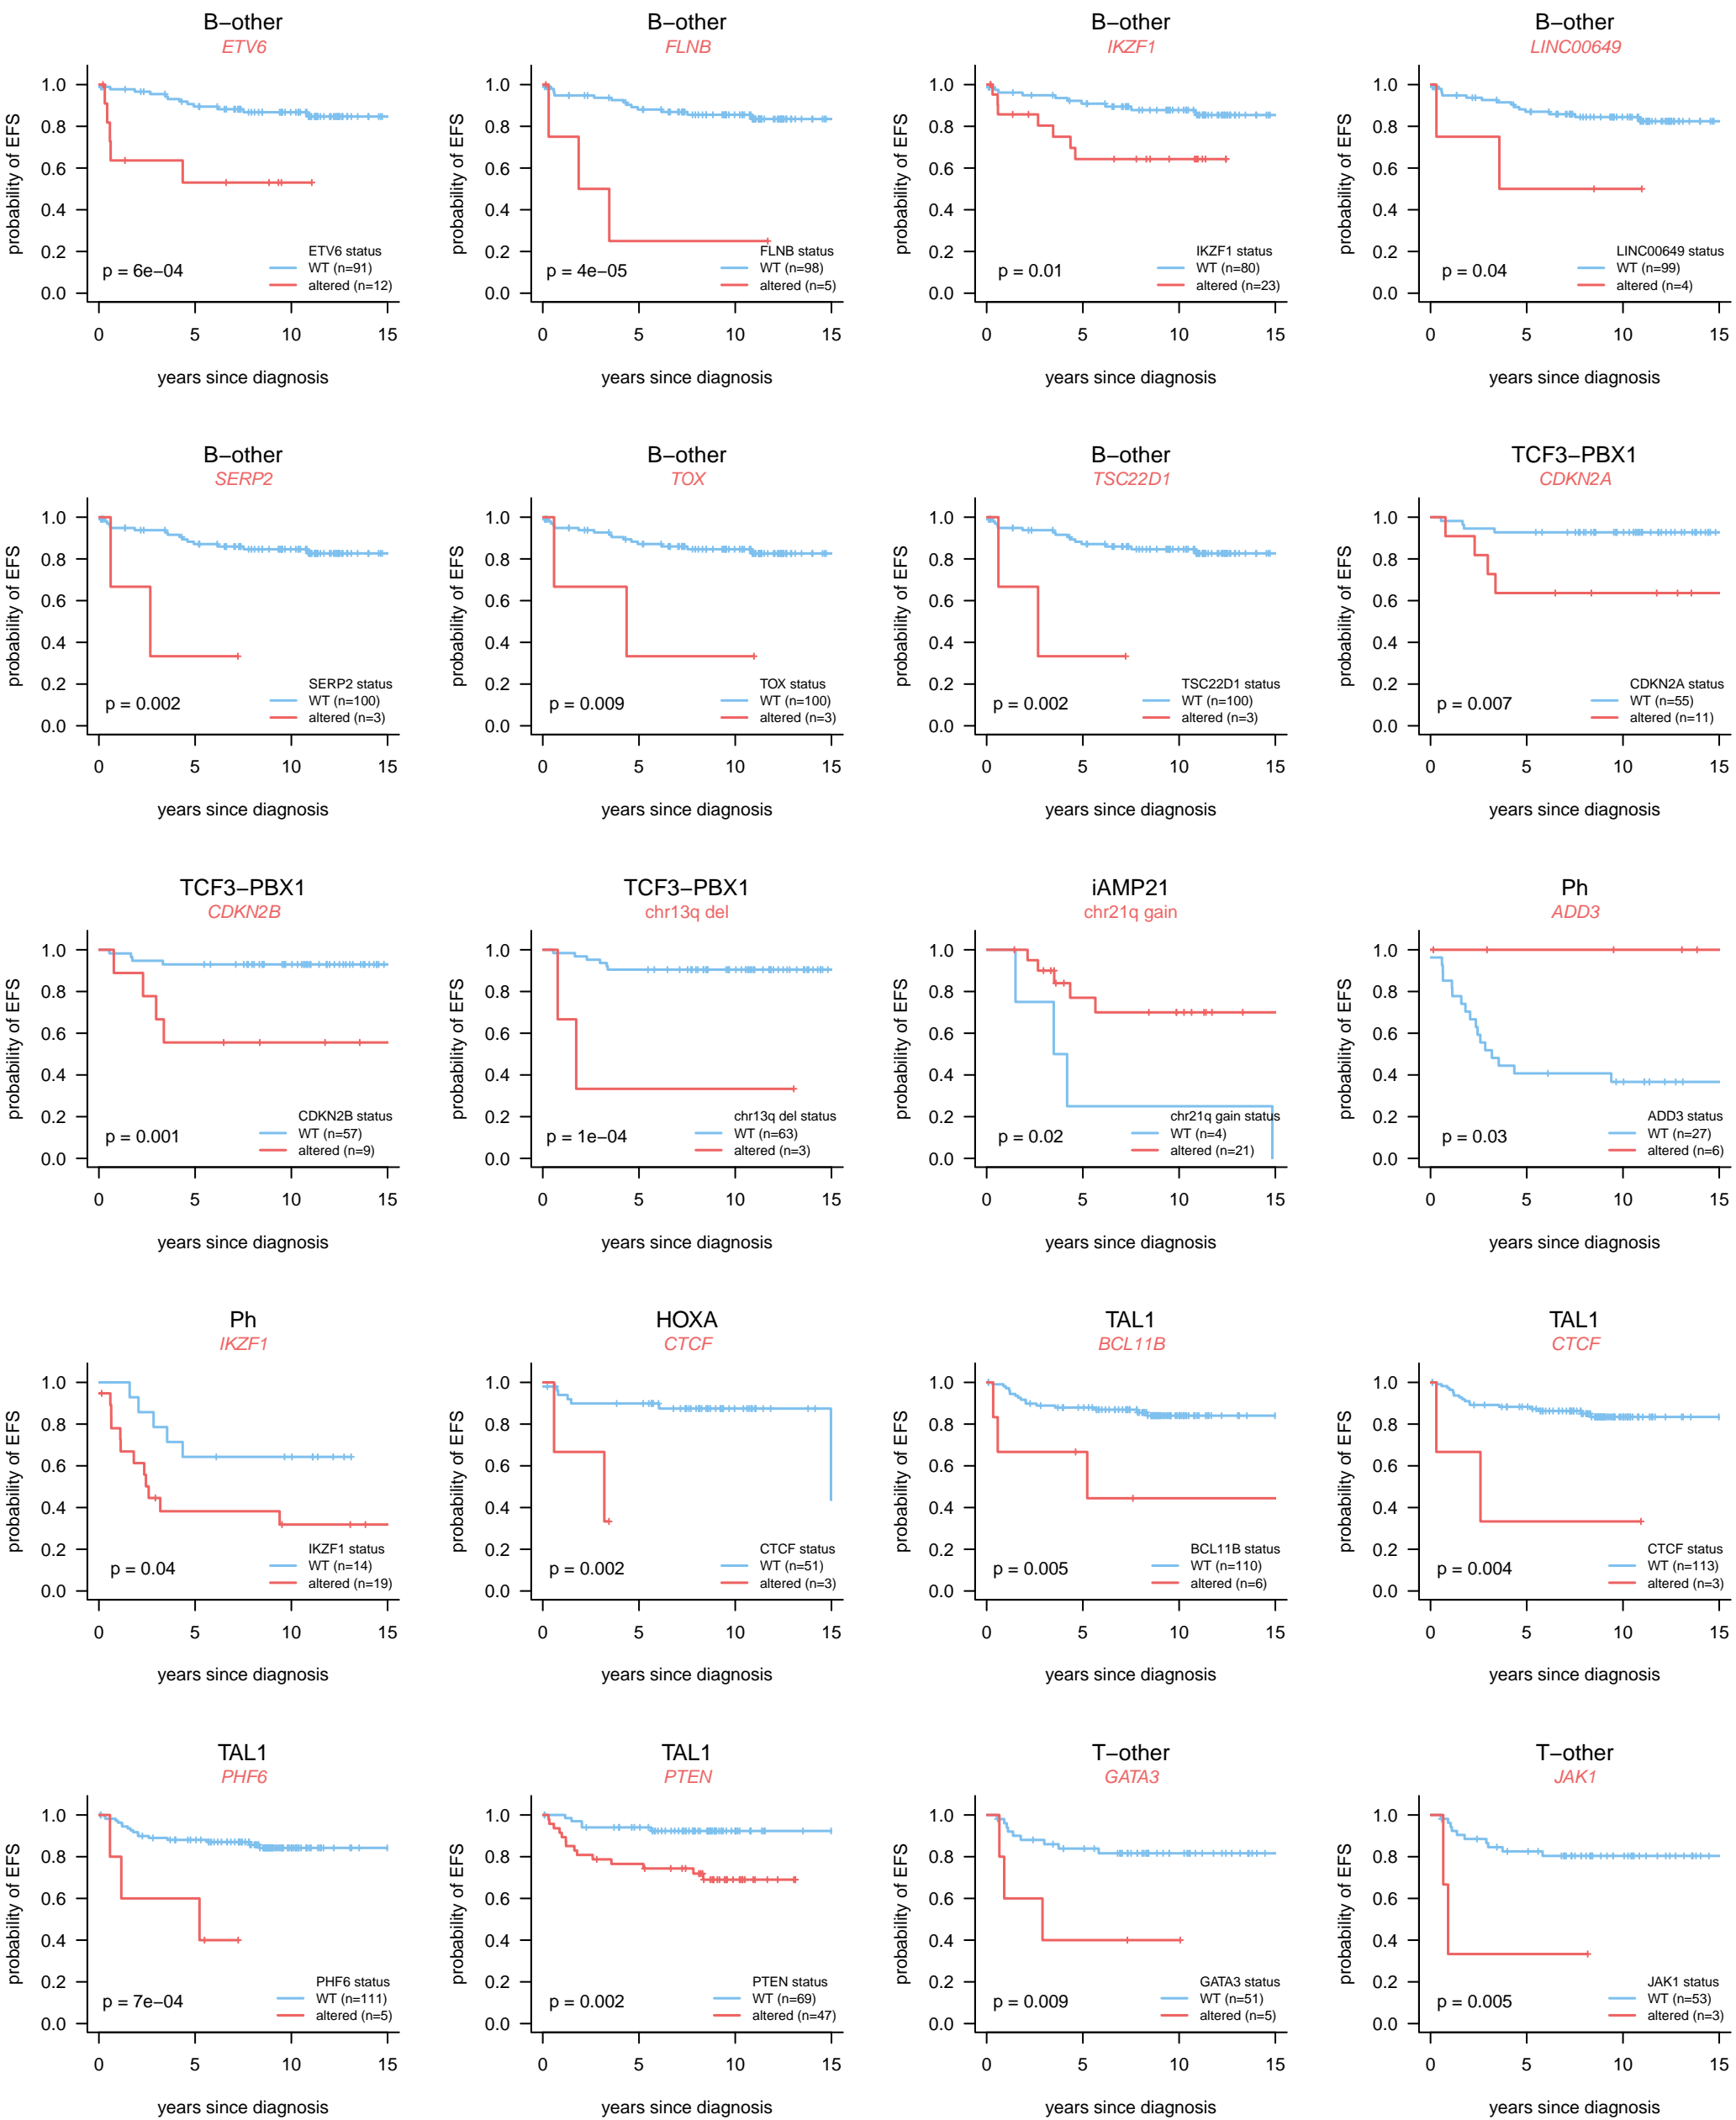

T-other  
*TP53*

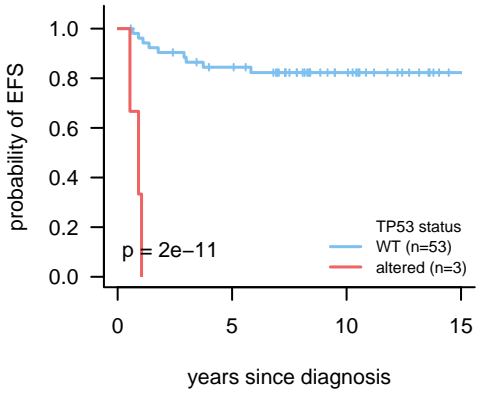

TLX3  
*NOTCH1*

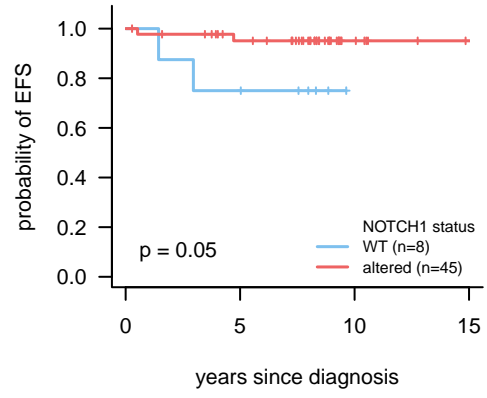

Ph-like other  
*IKZF1*

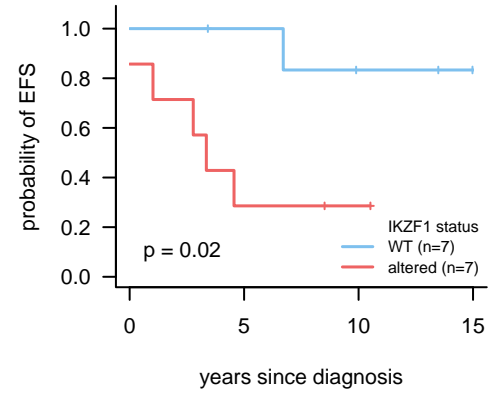

Ph-like other  
*TCF4*

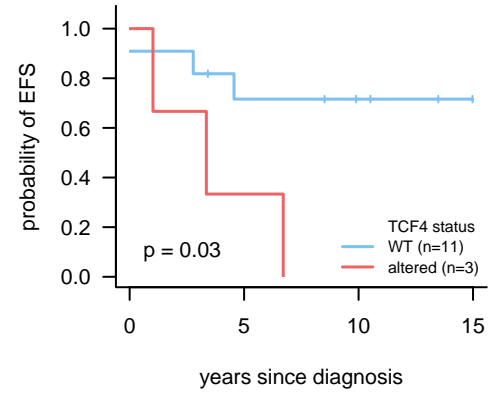

Low hypodiploid  
*chr15 del*

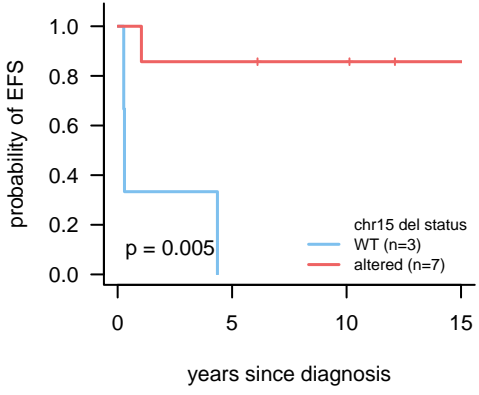

Supplement: NIHMS1848401-supplement-1848401_Sup_Dataset_8.pdf [file NIHMS1848401-supplement-1848401_Sup_Dataset_8.pdf]
