# Supplementary material
Source: PubMed Central journal article supplement (PMC9700506)

# Supplementary Dataset 3

## Somatic alterations associated with risk within subtypes

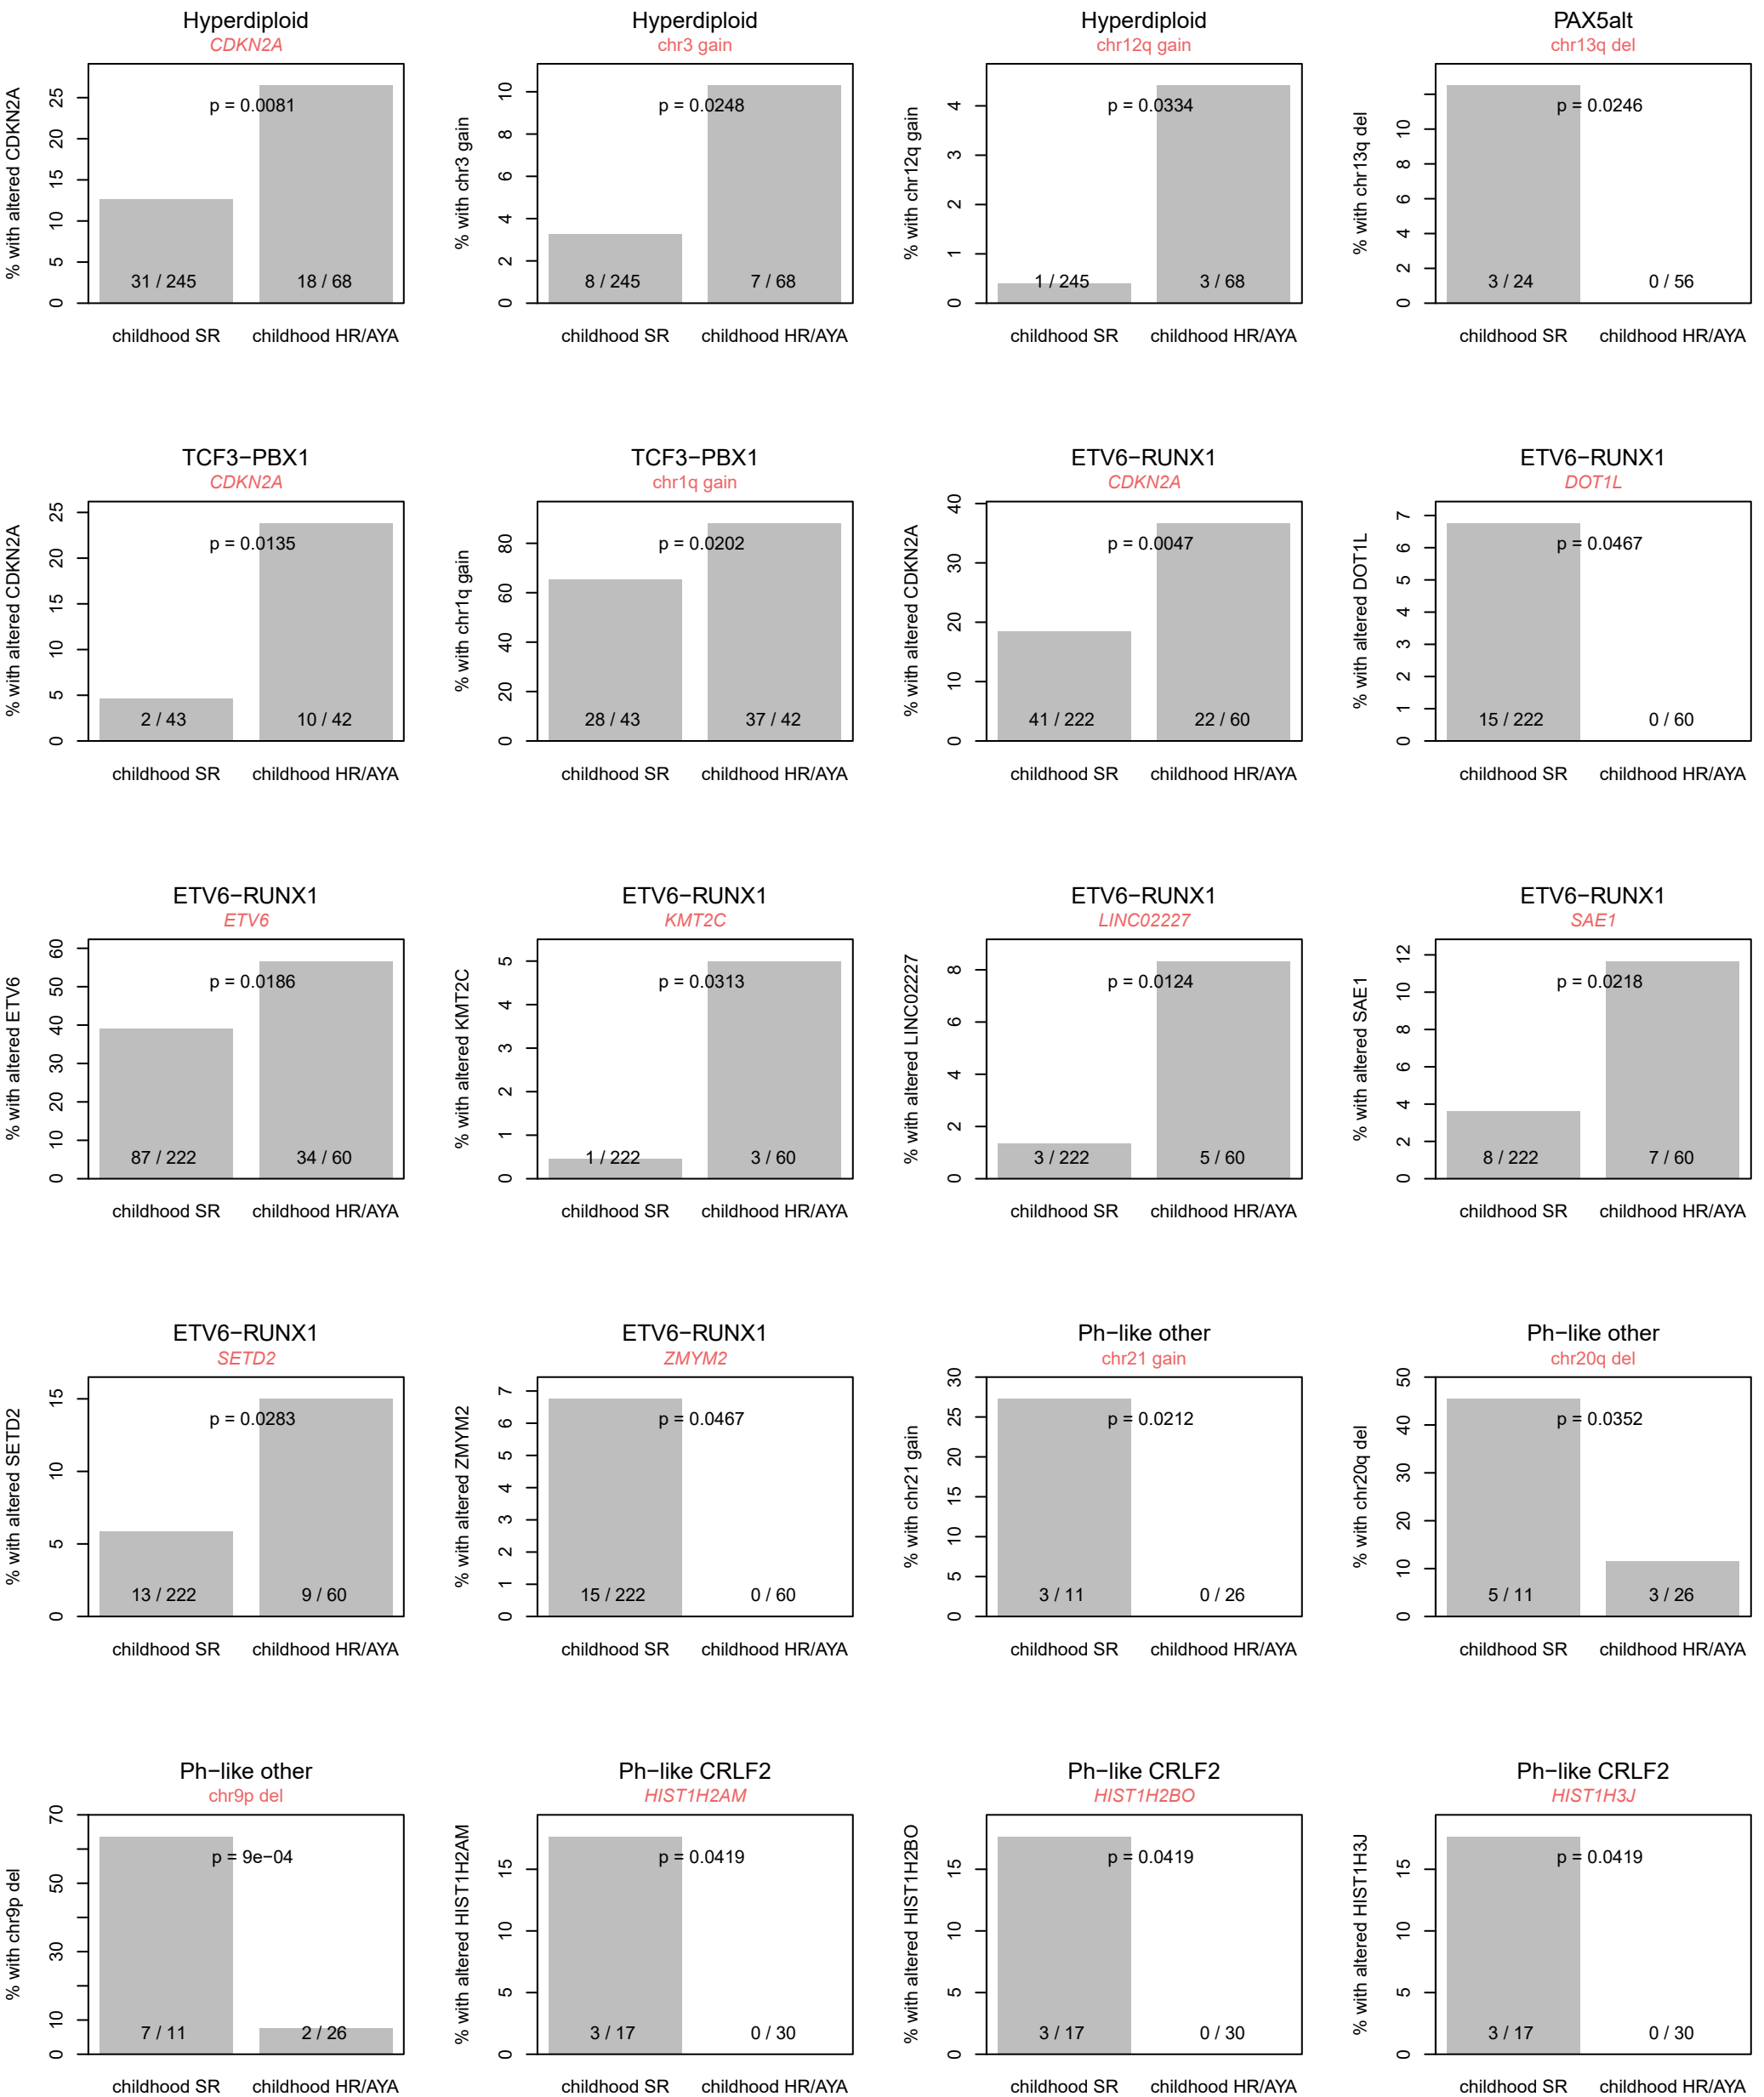

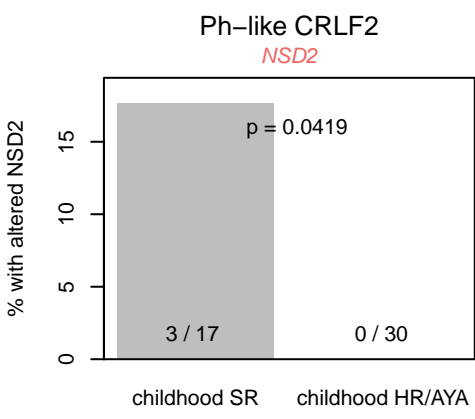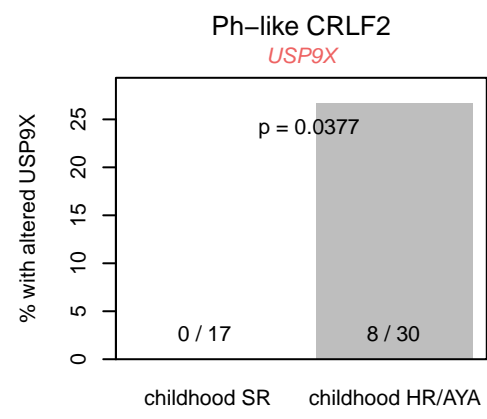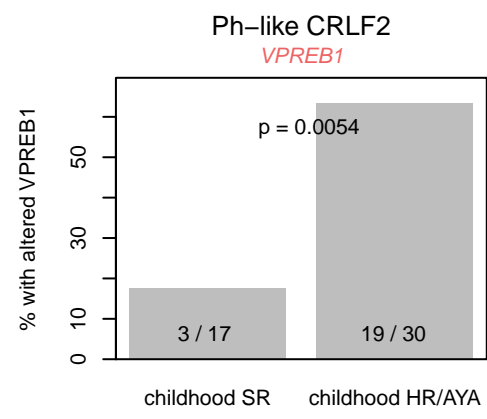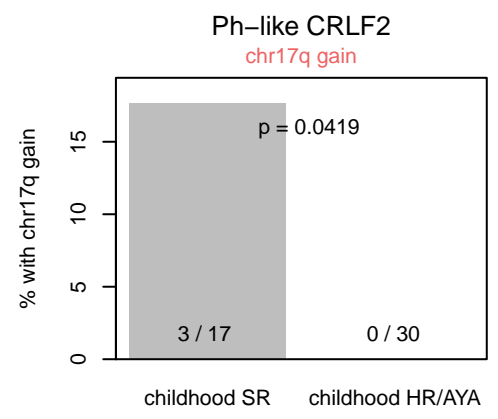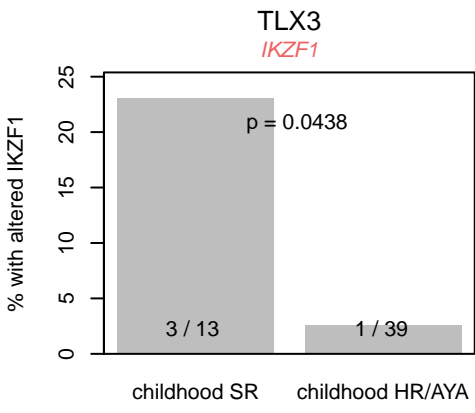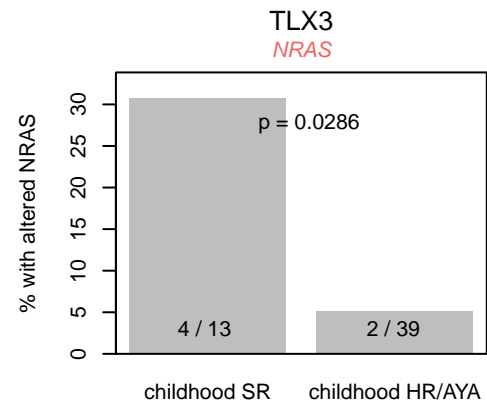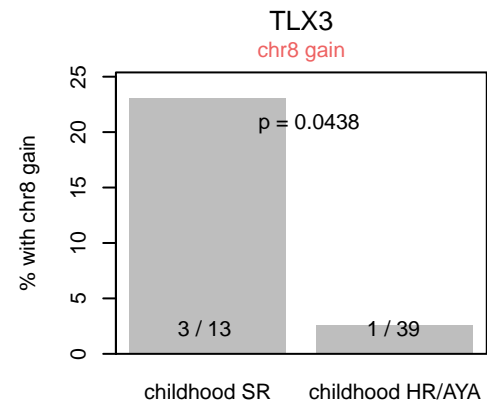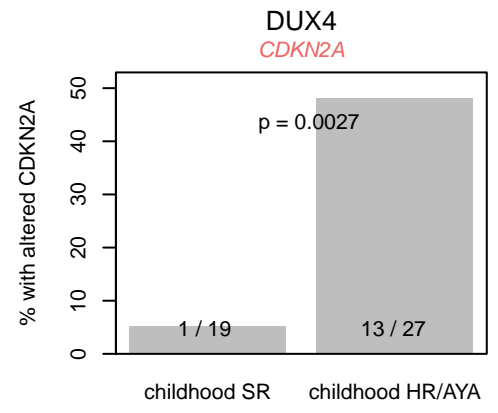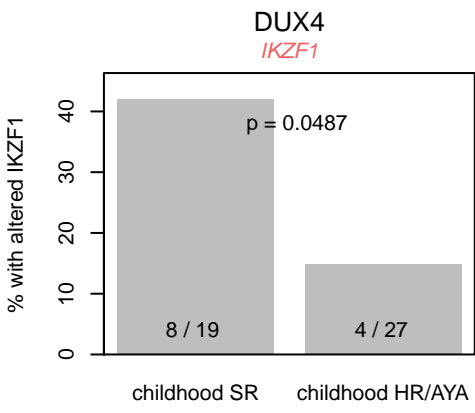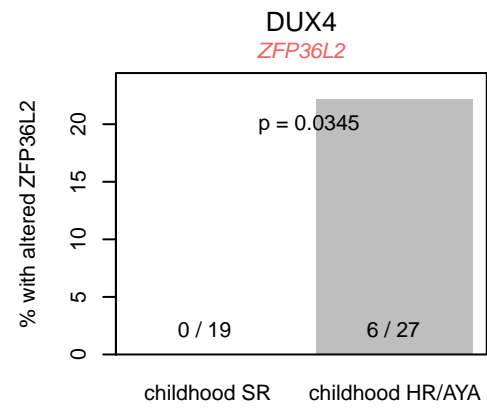

Supplement: NIHMS1848401-supplement-1848401_Sup_Dataset_3.pdf [file NIHMS1848401-supplement-1848401_Sup_Dataset_3.pdf]

# Supplementary Dataset 6

## Co-mutation in each subtype

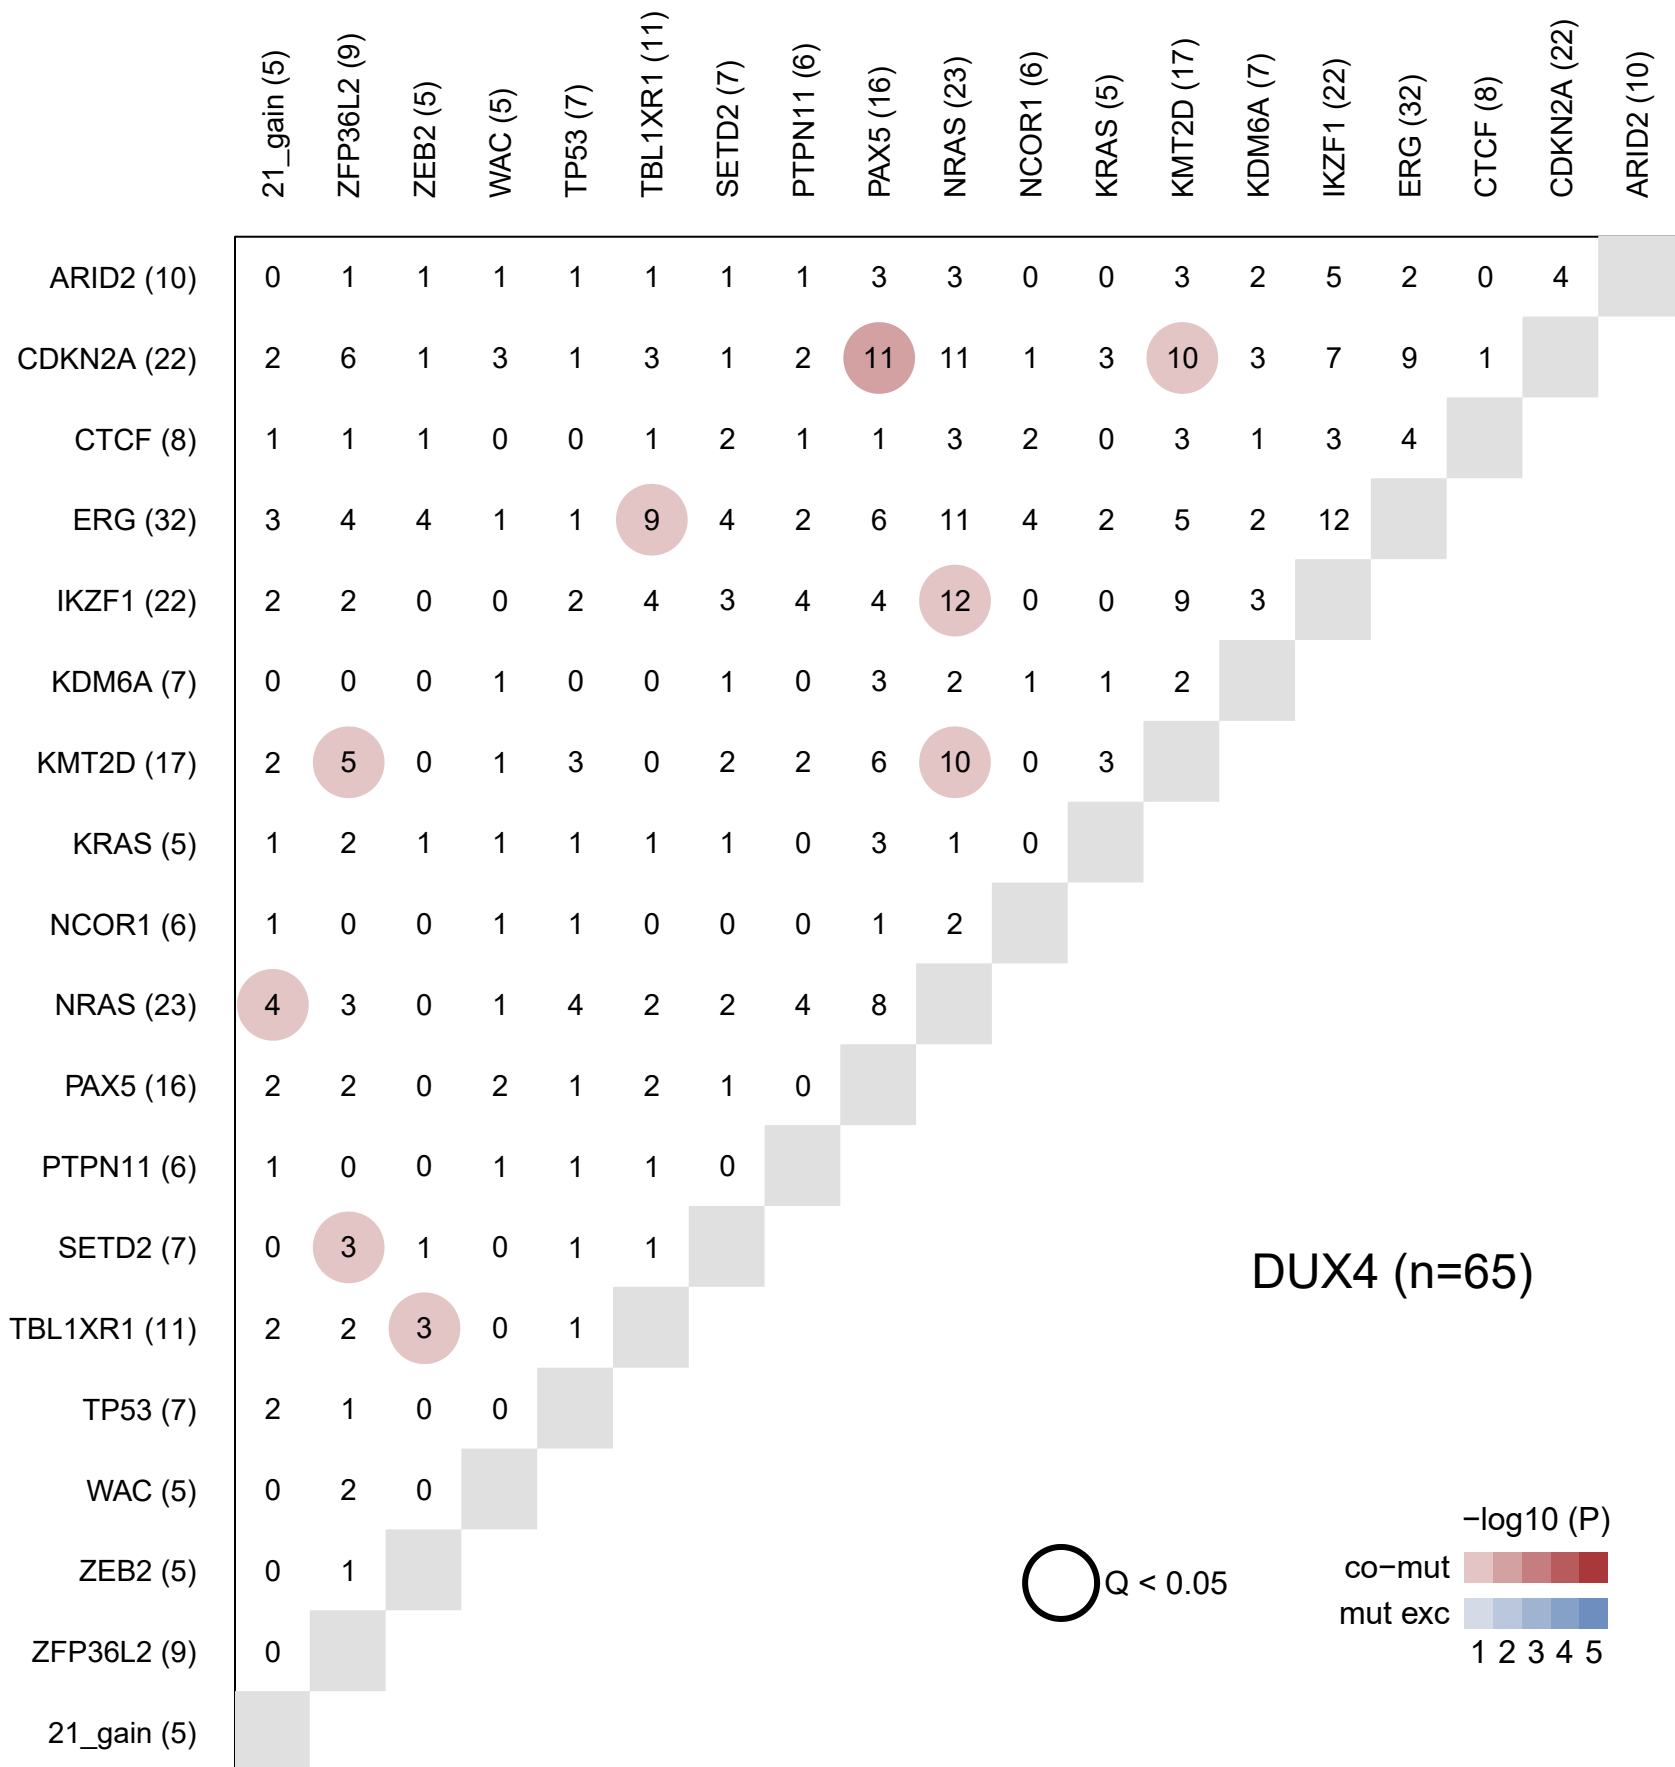



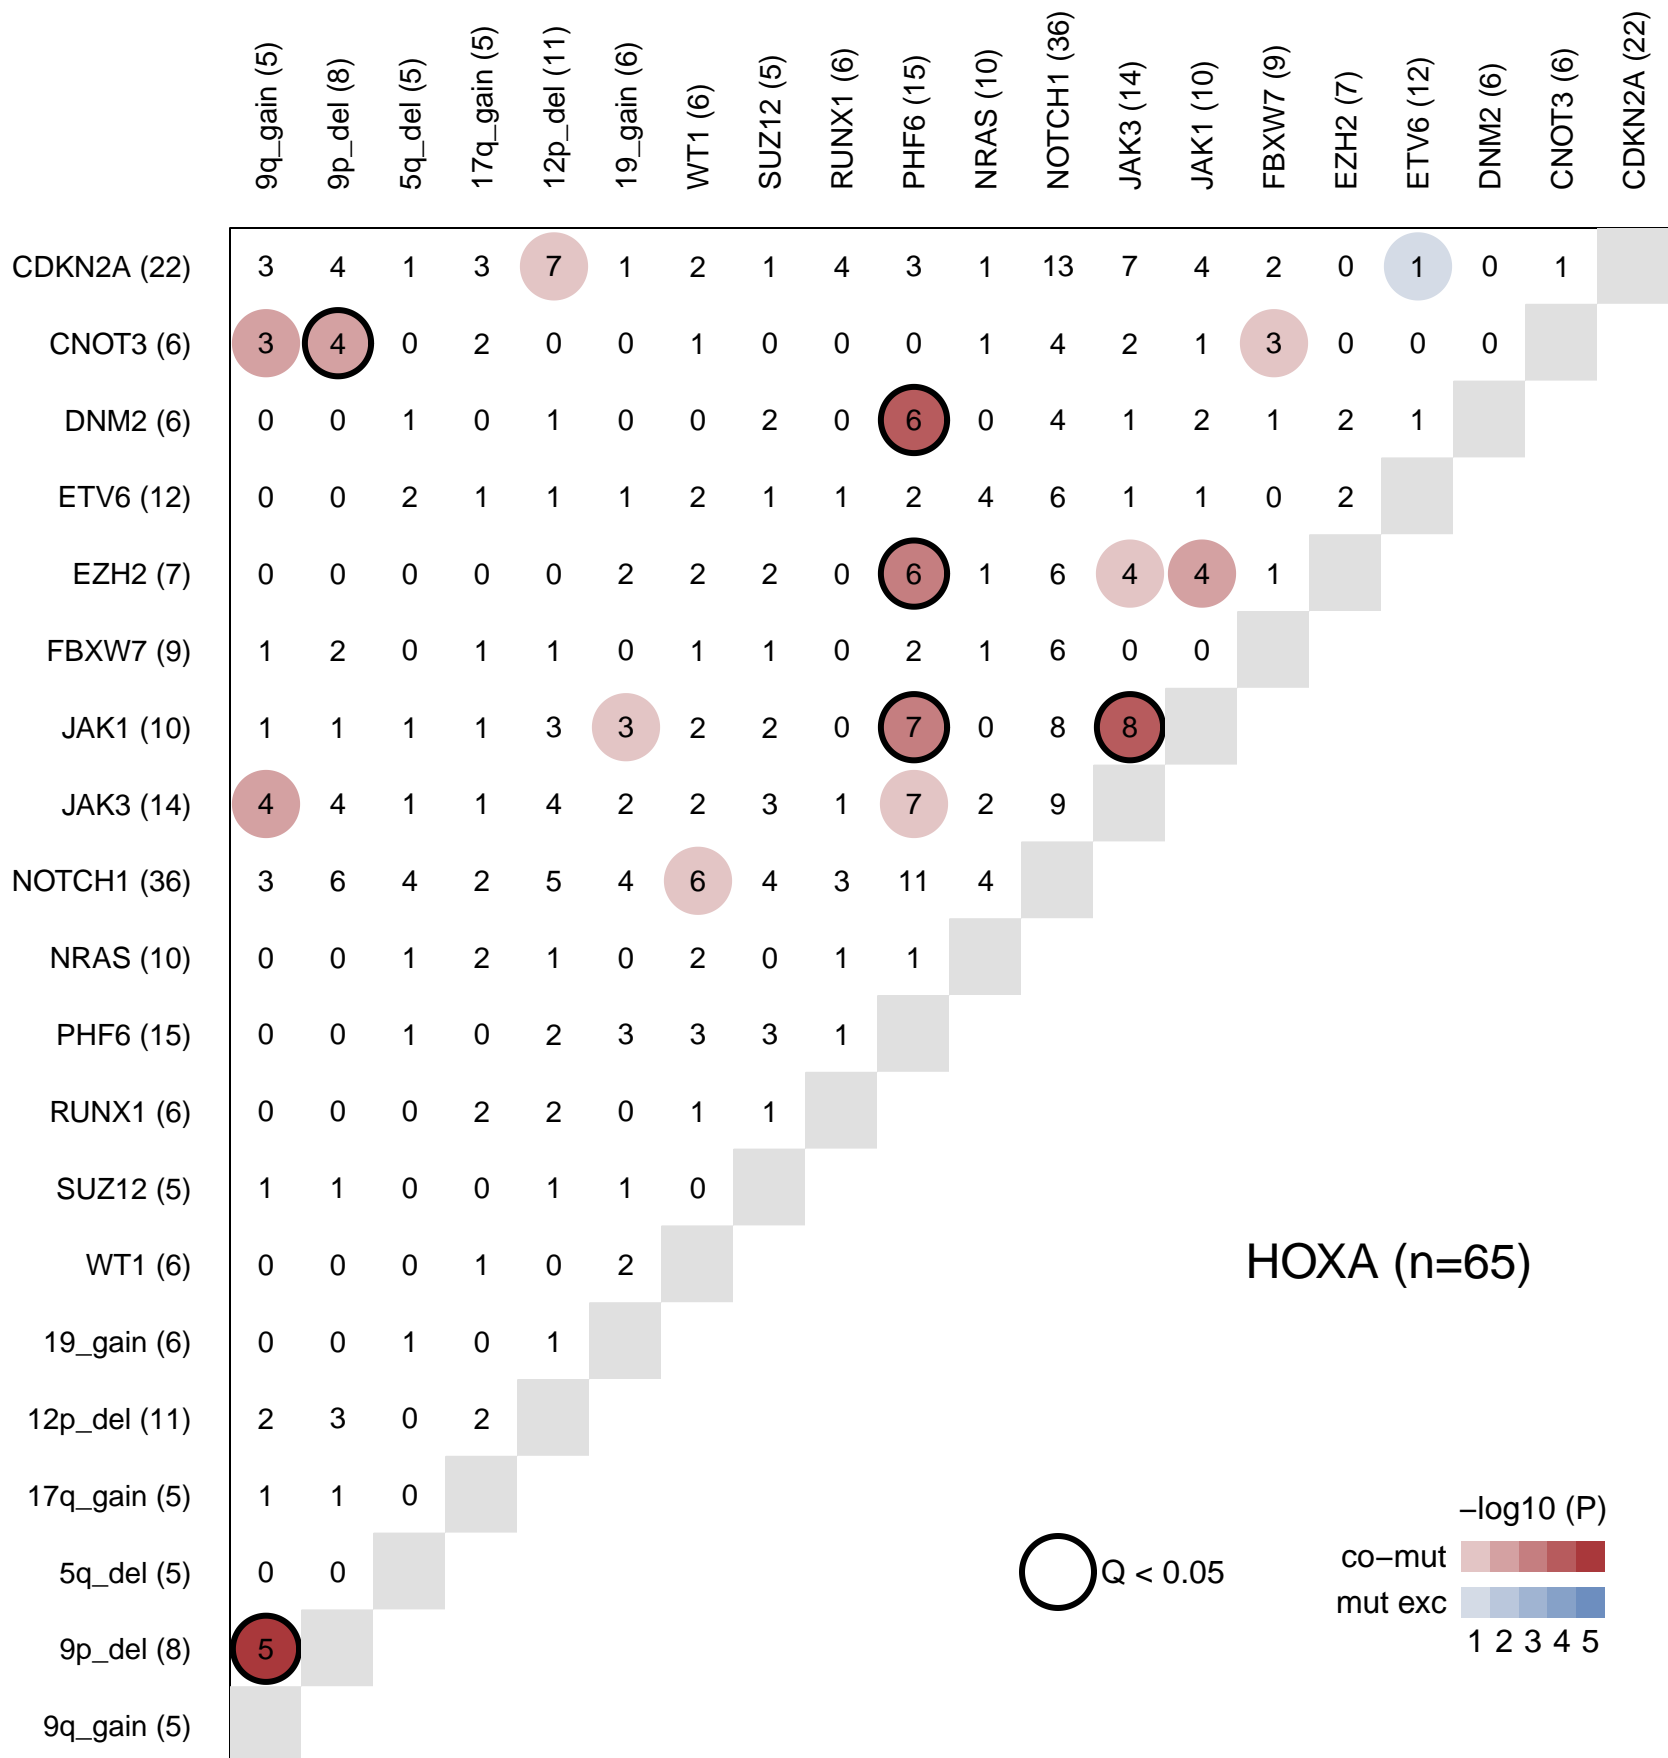

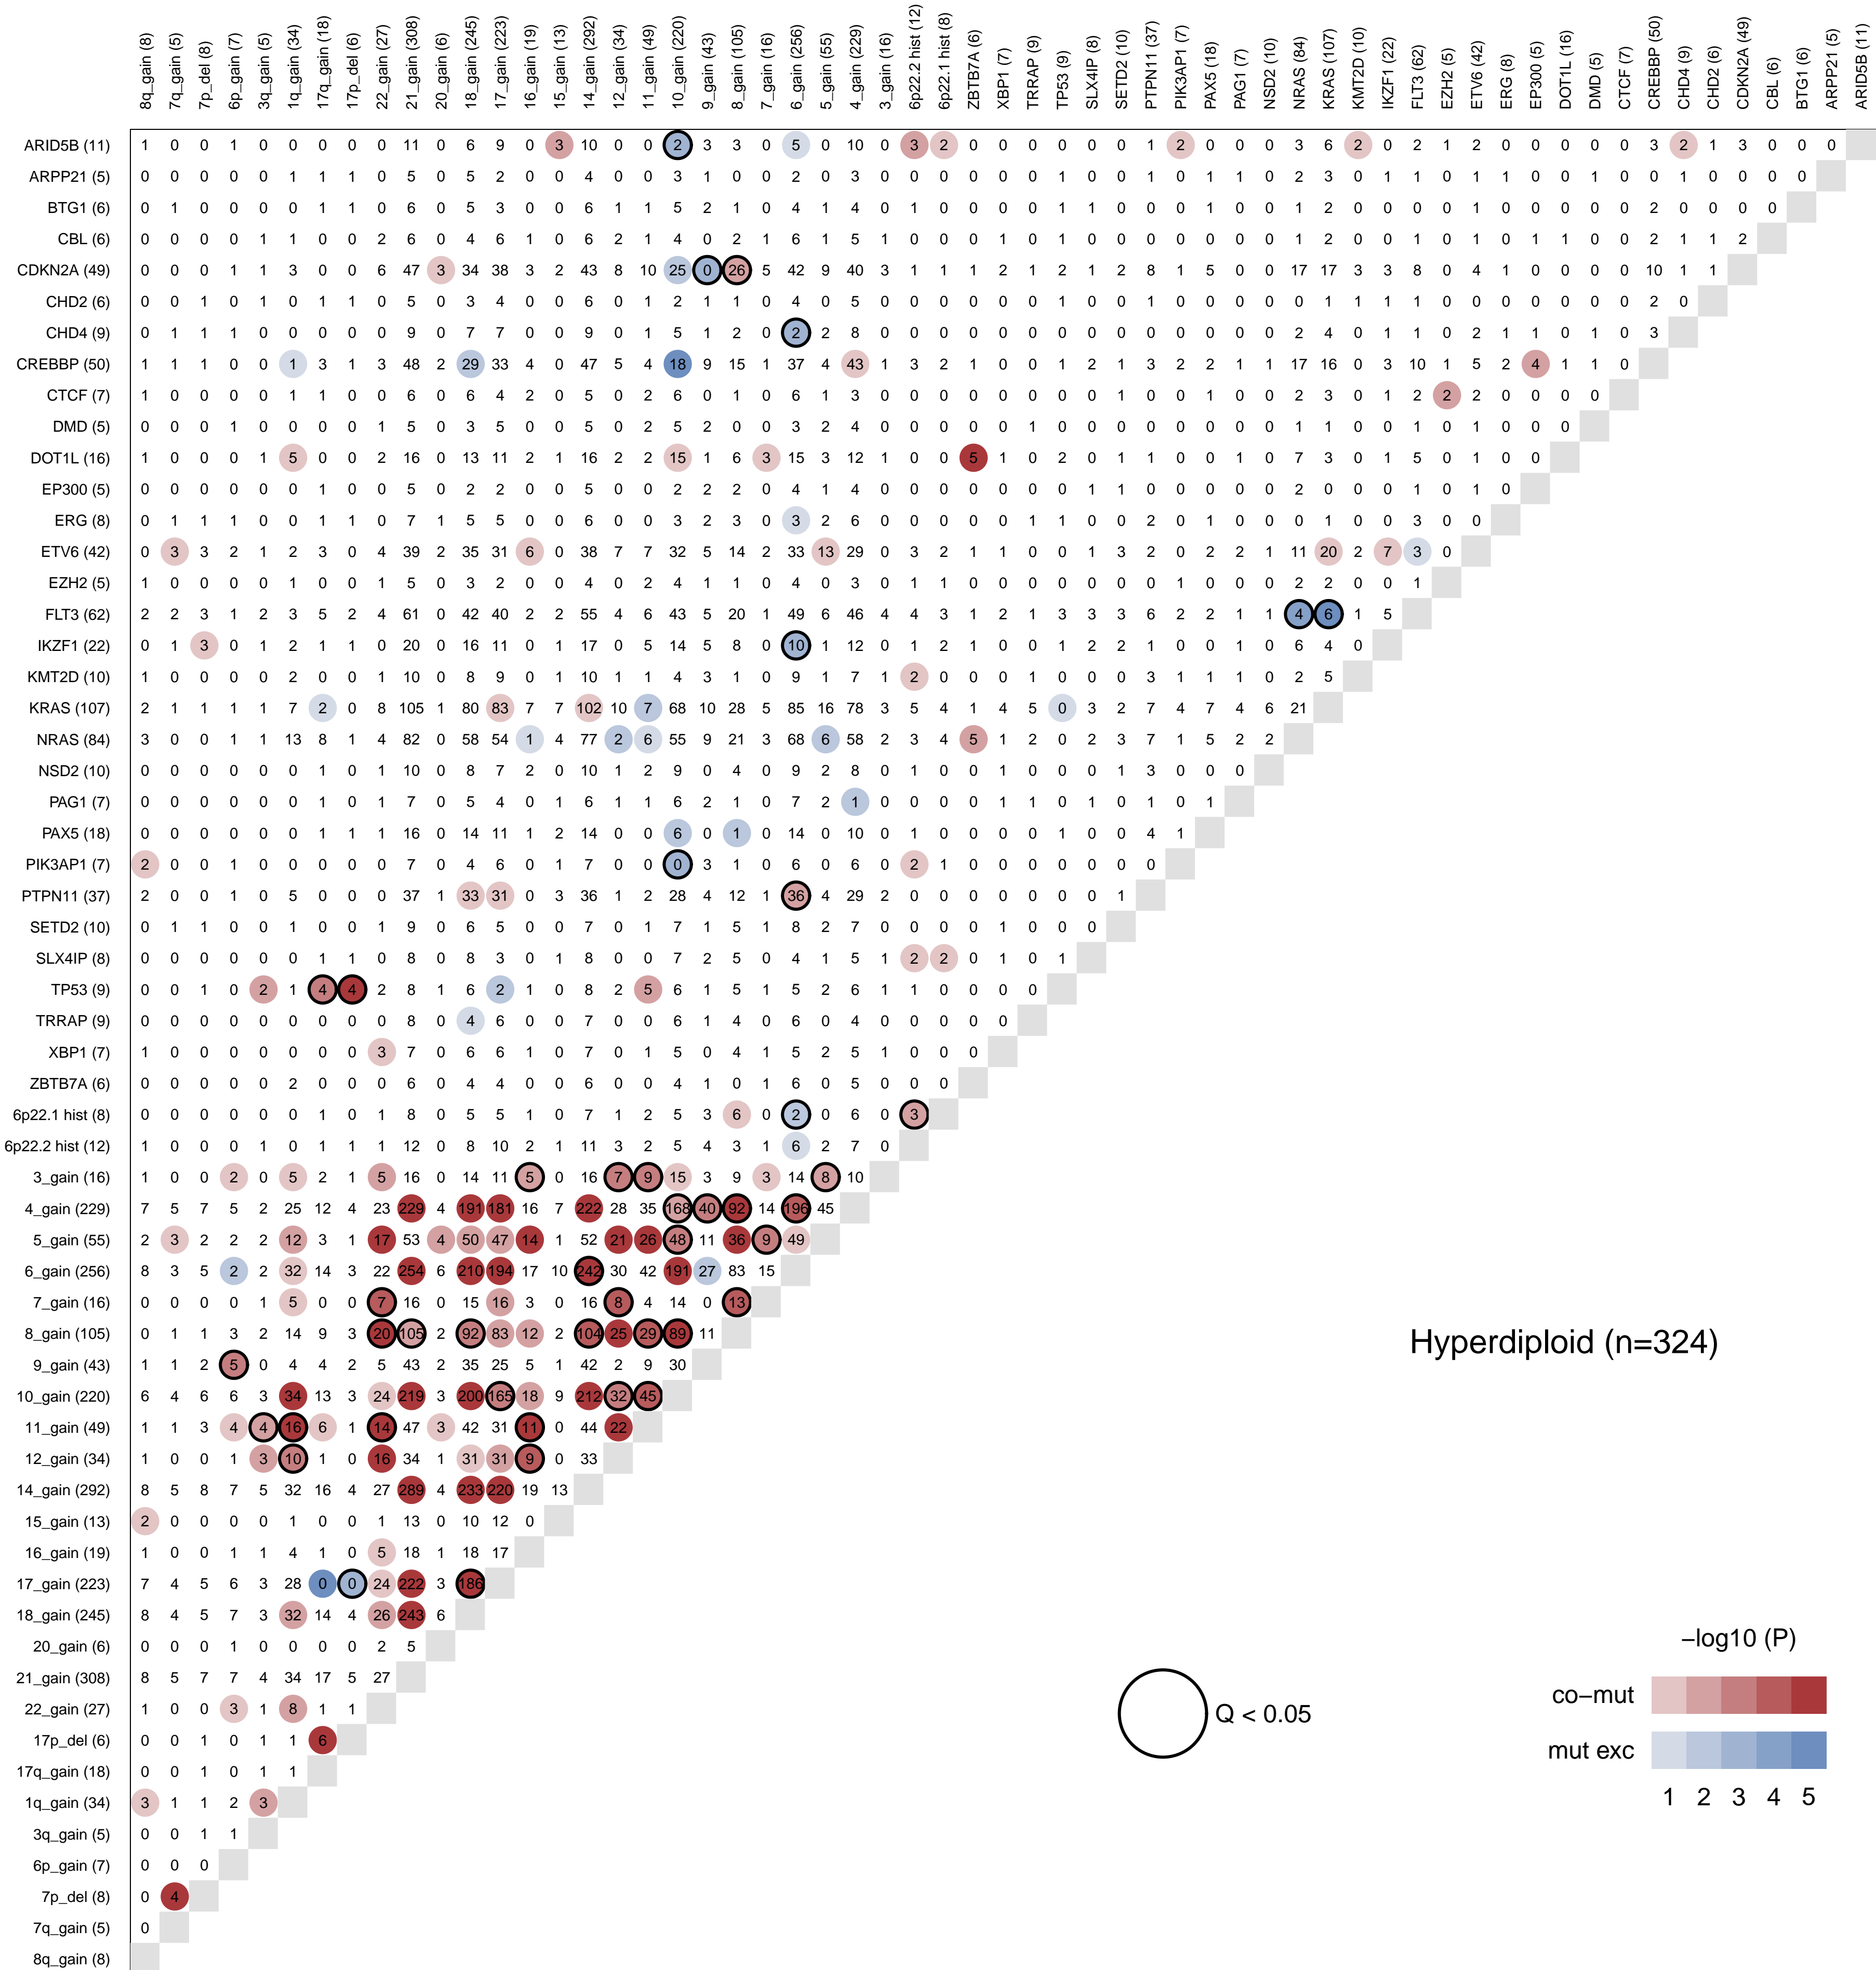



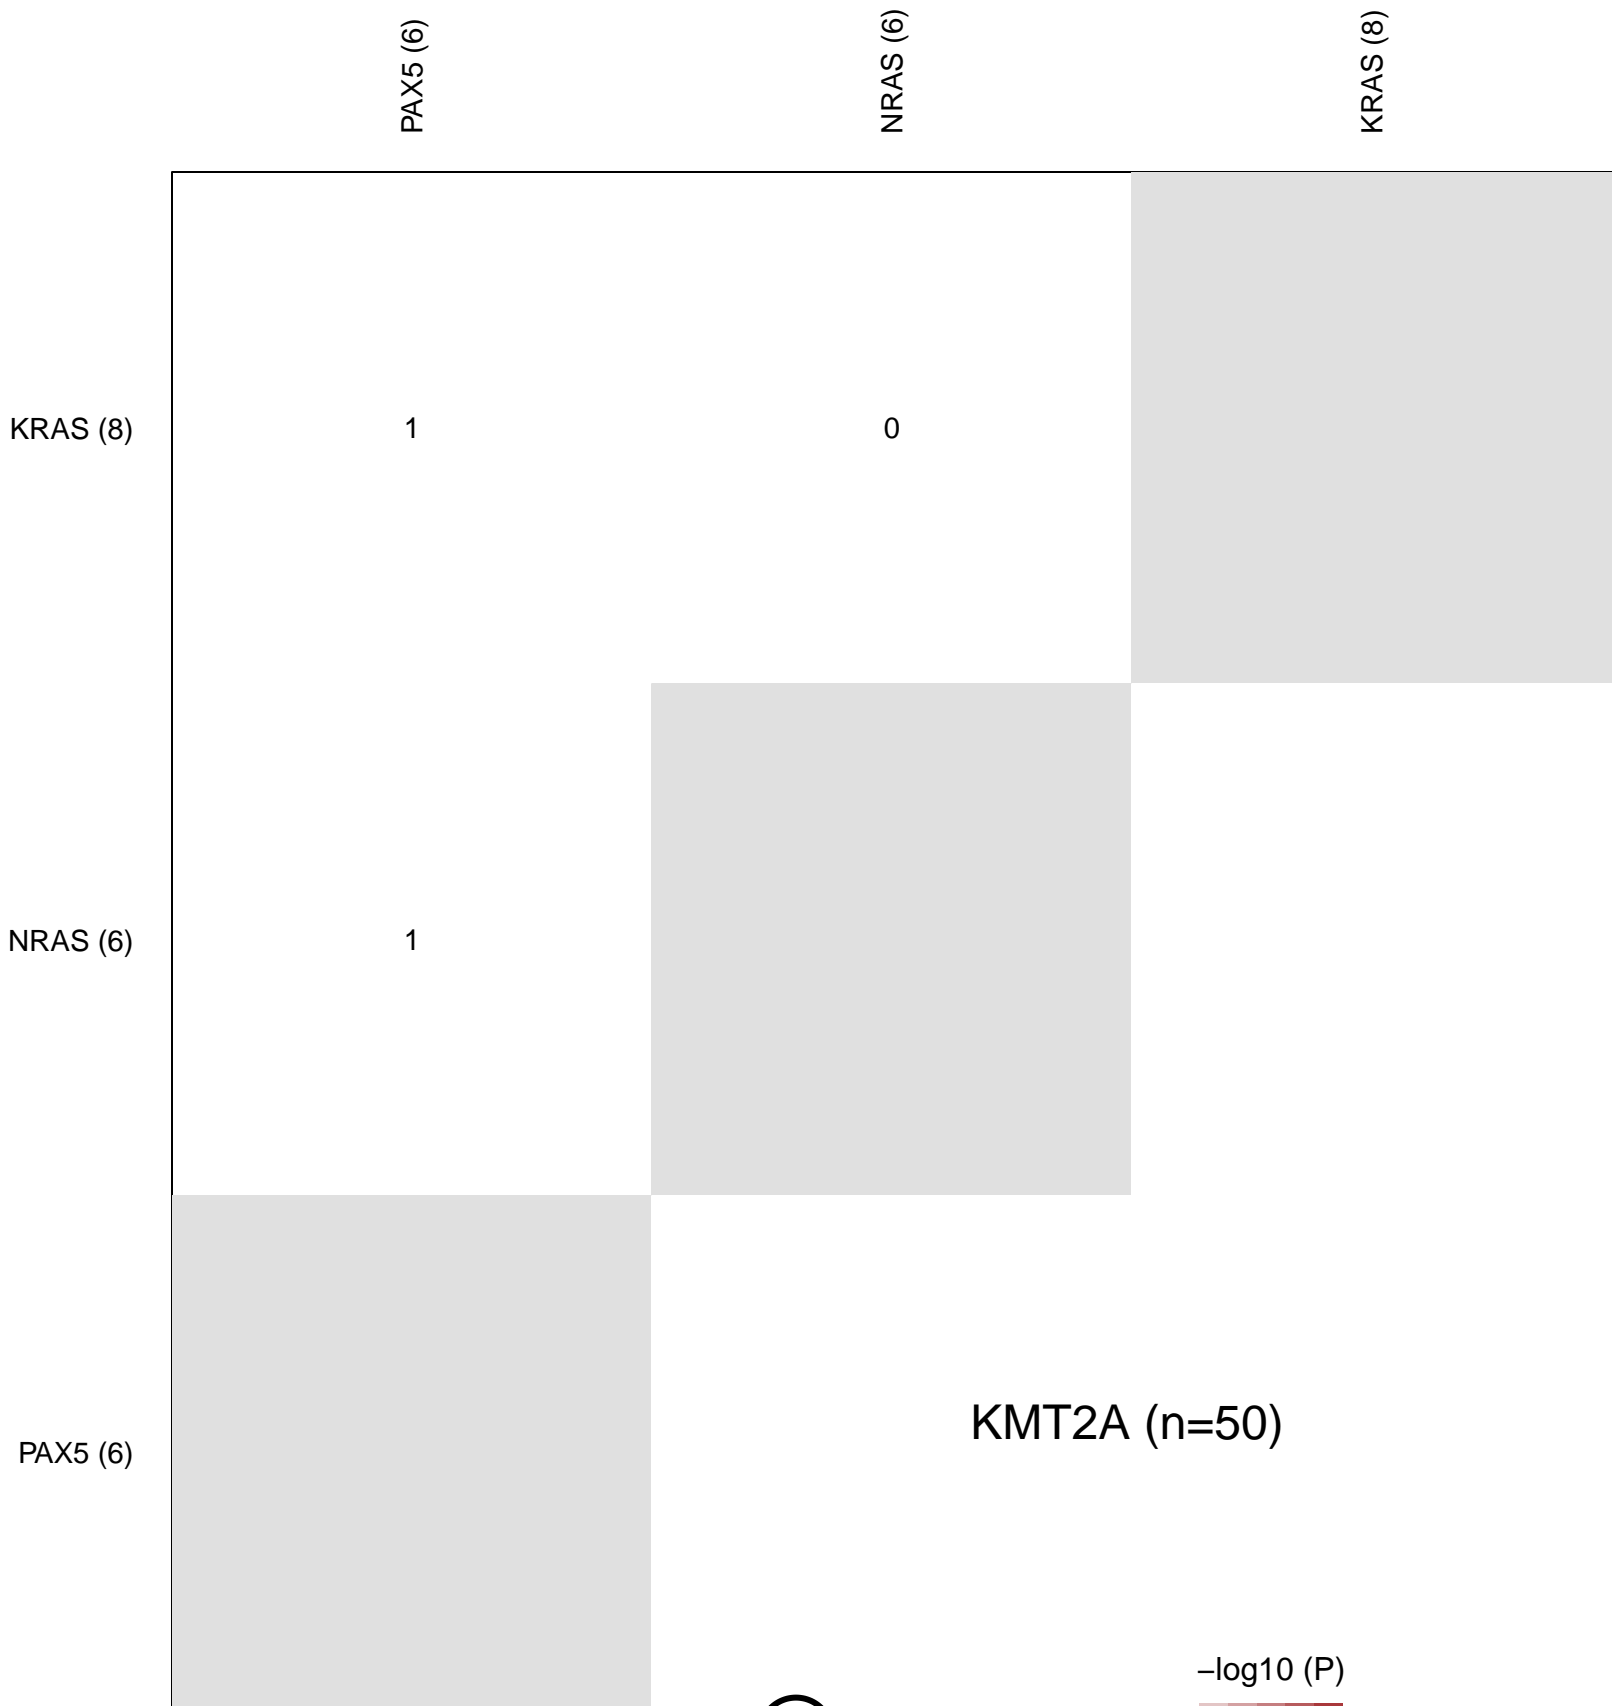

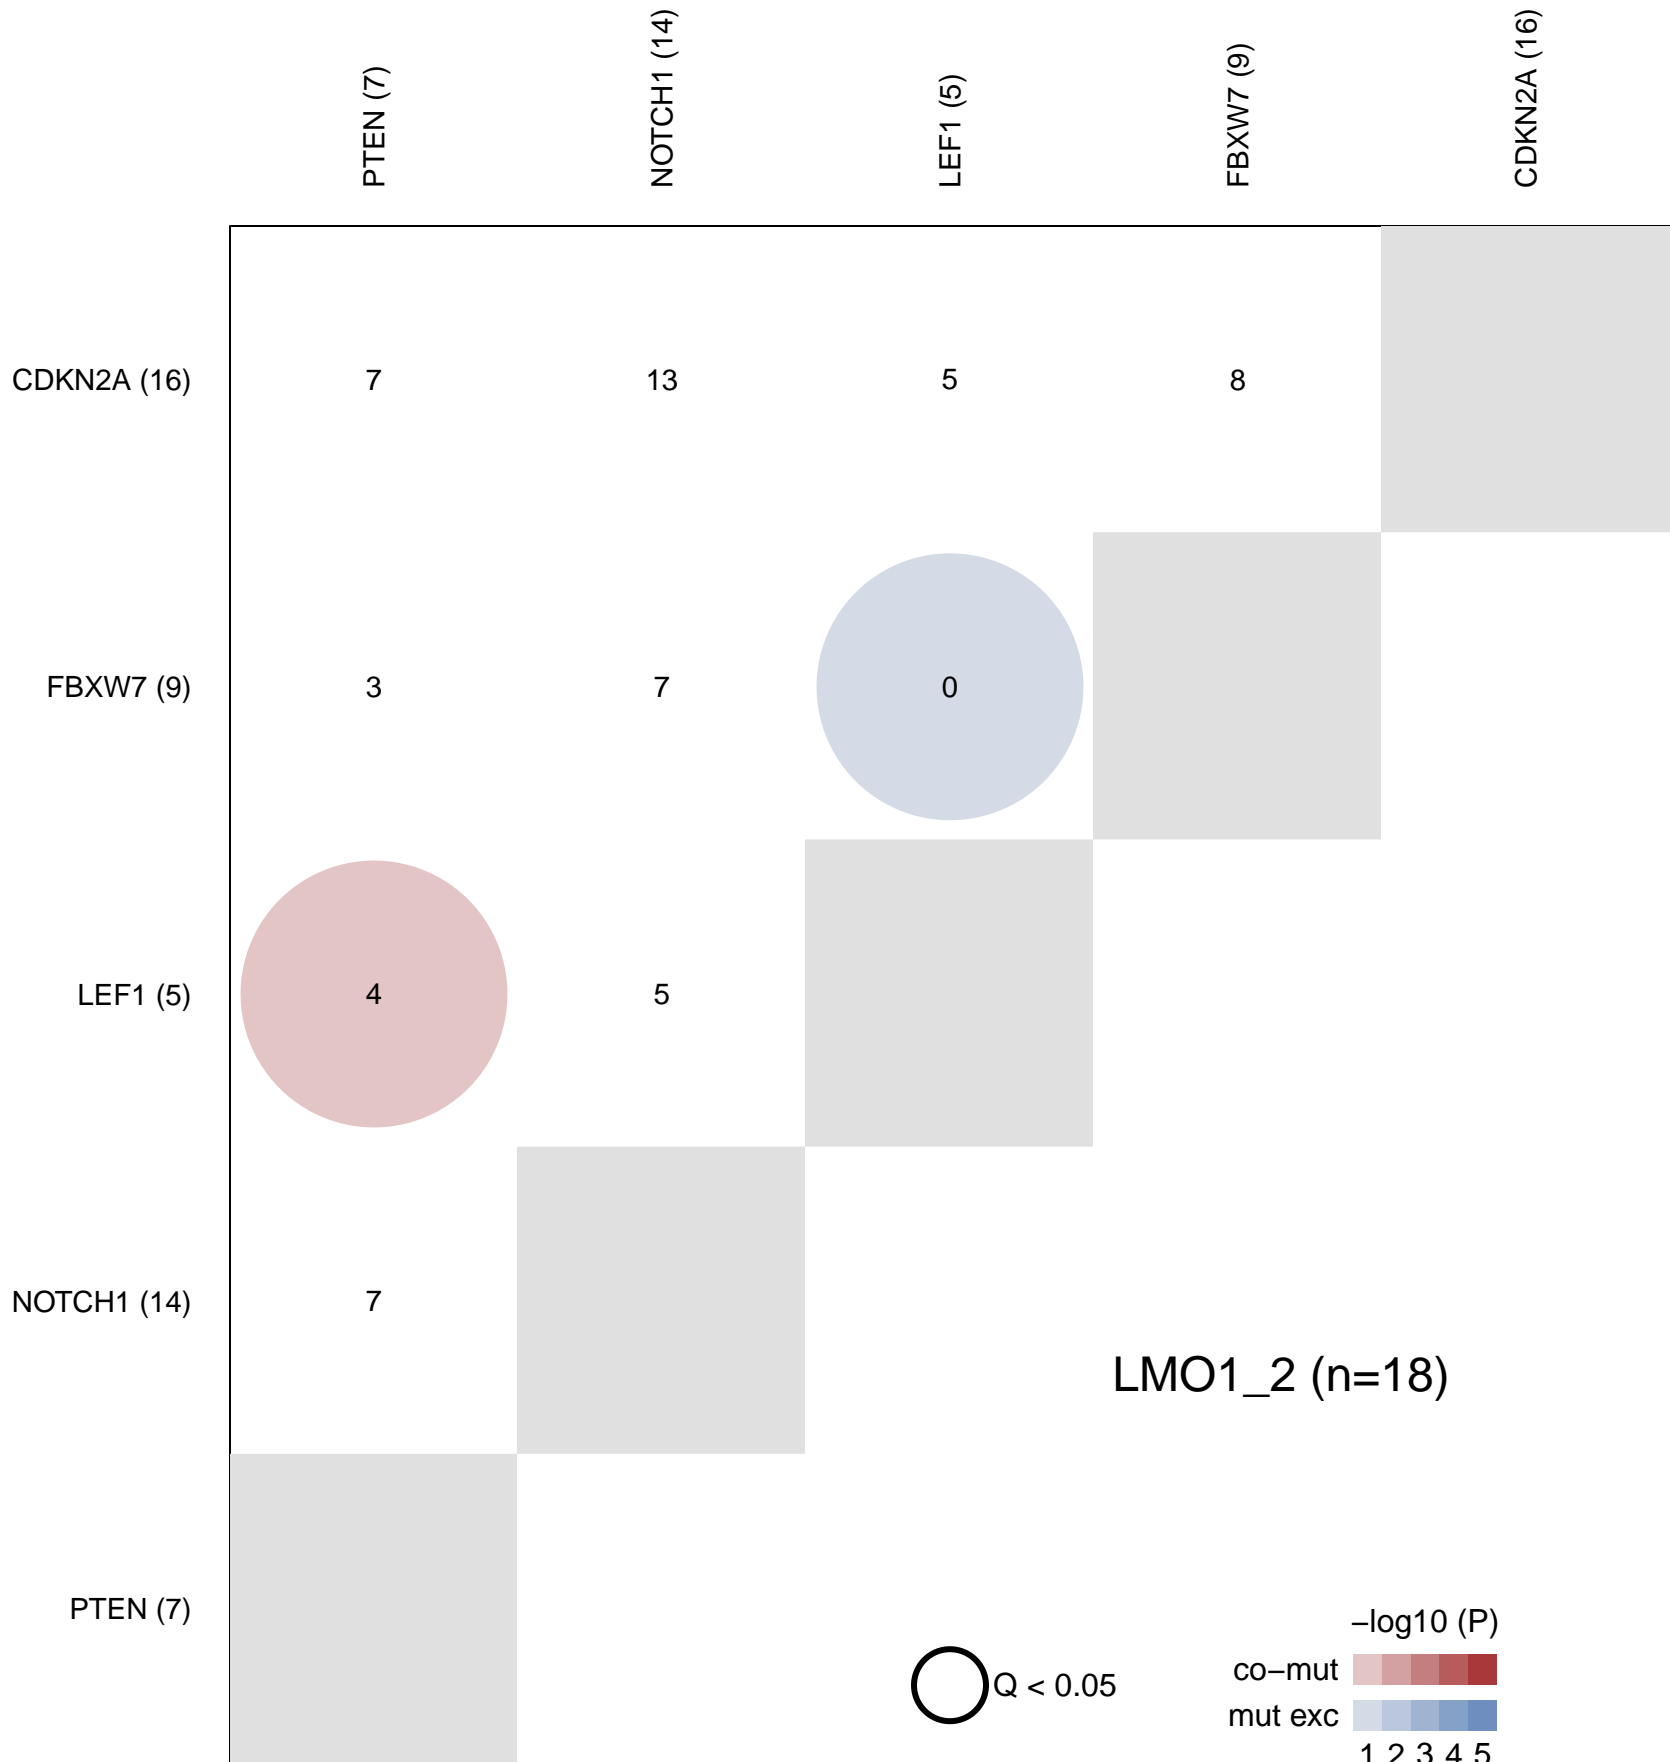

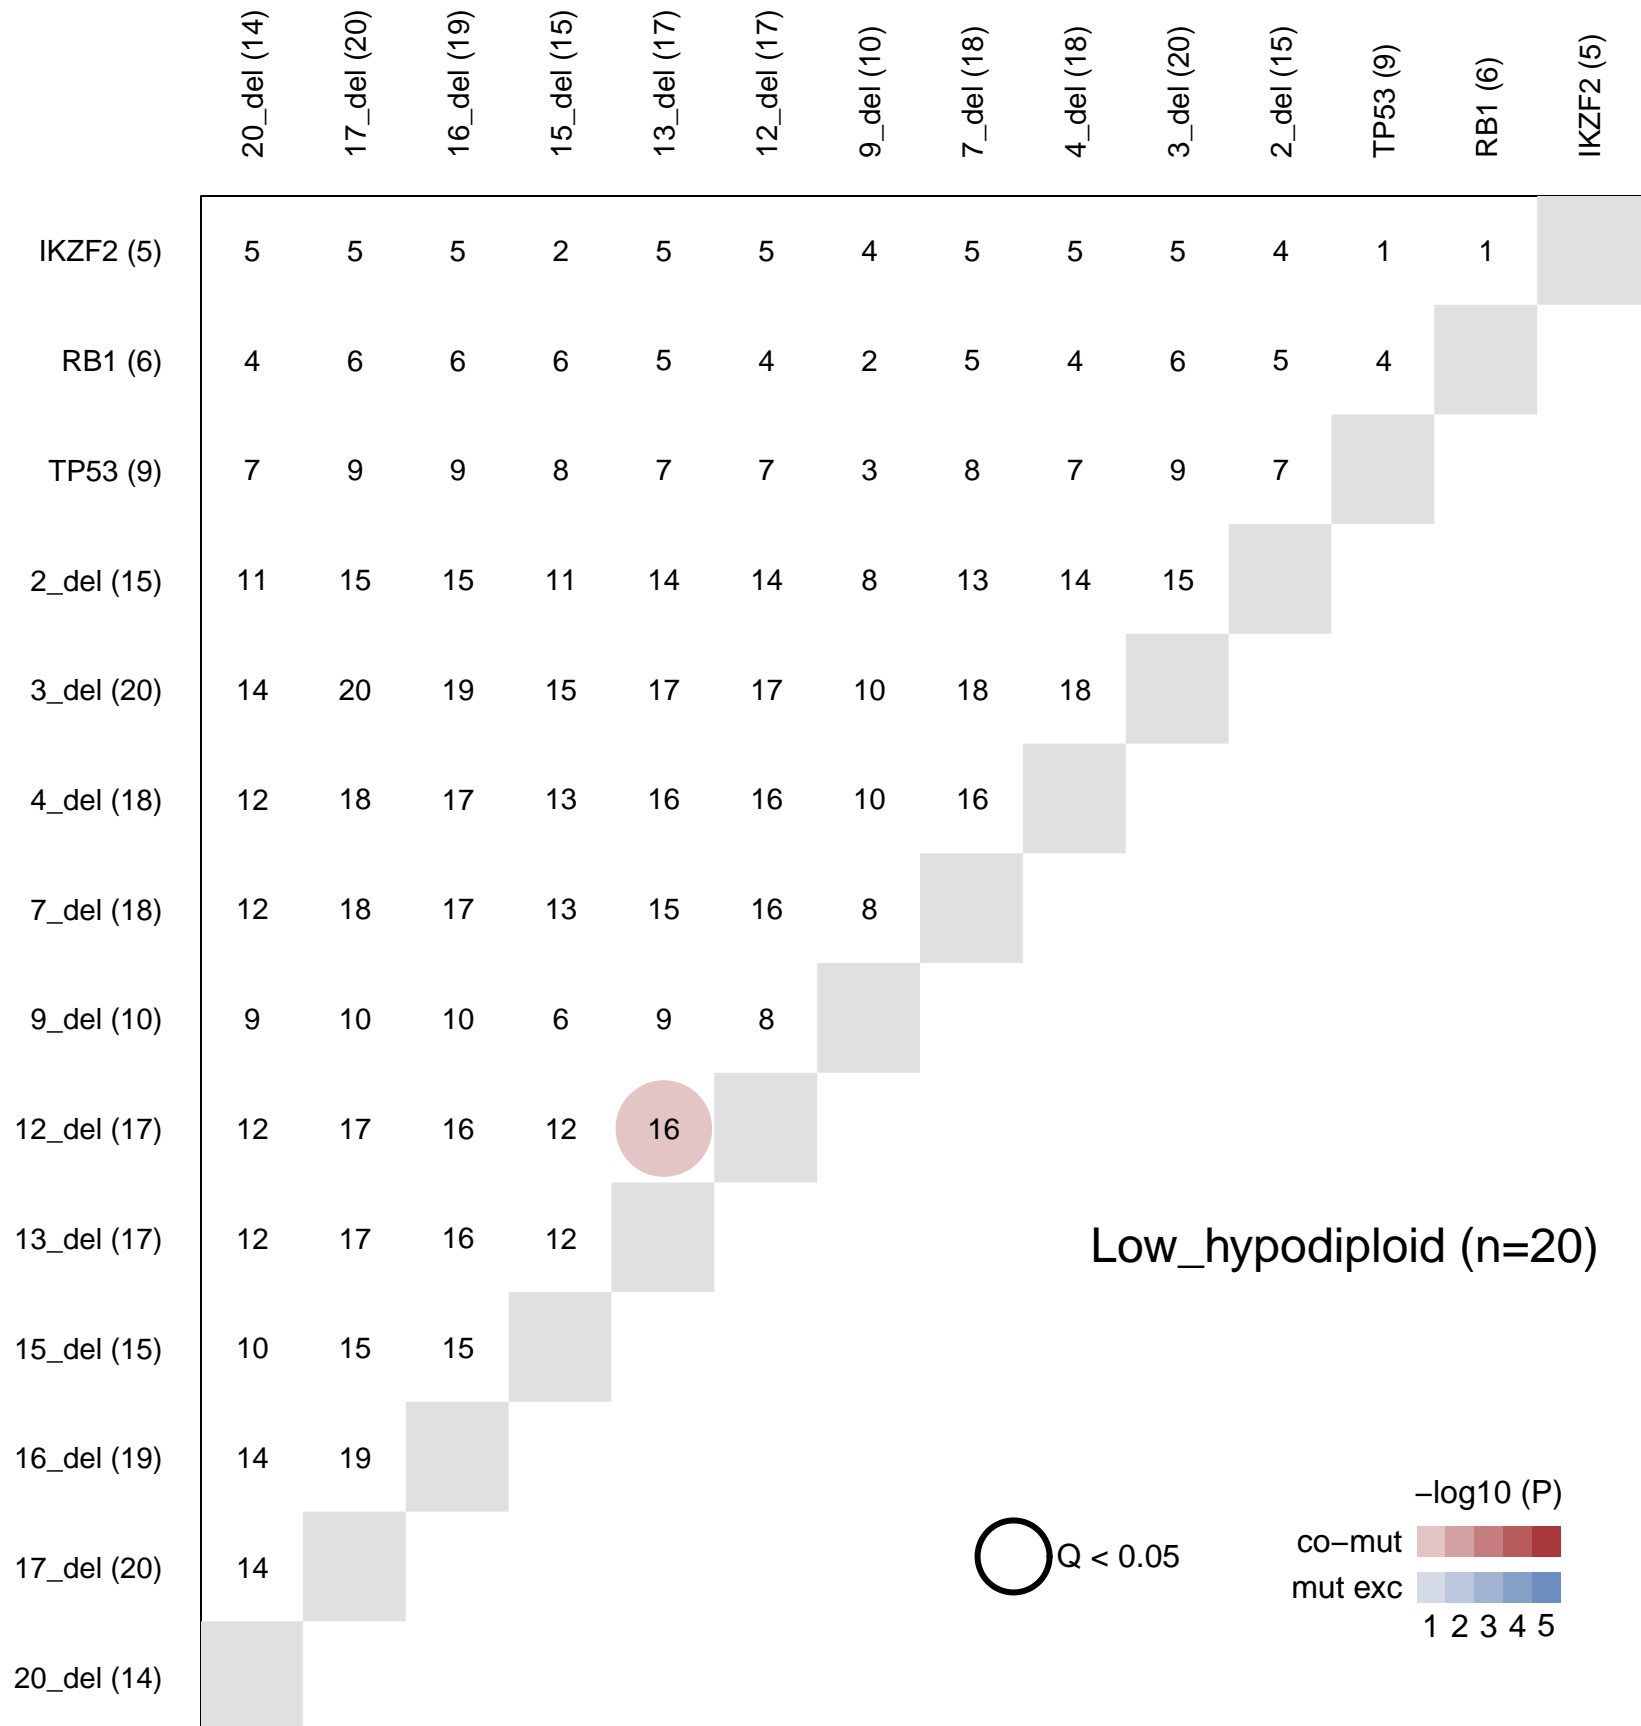



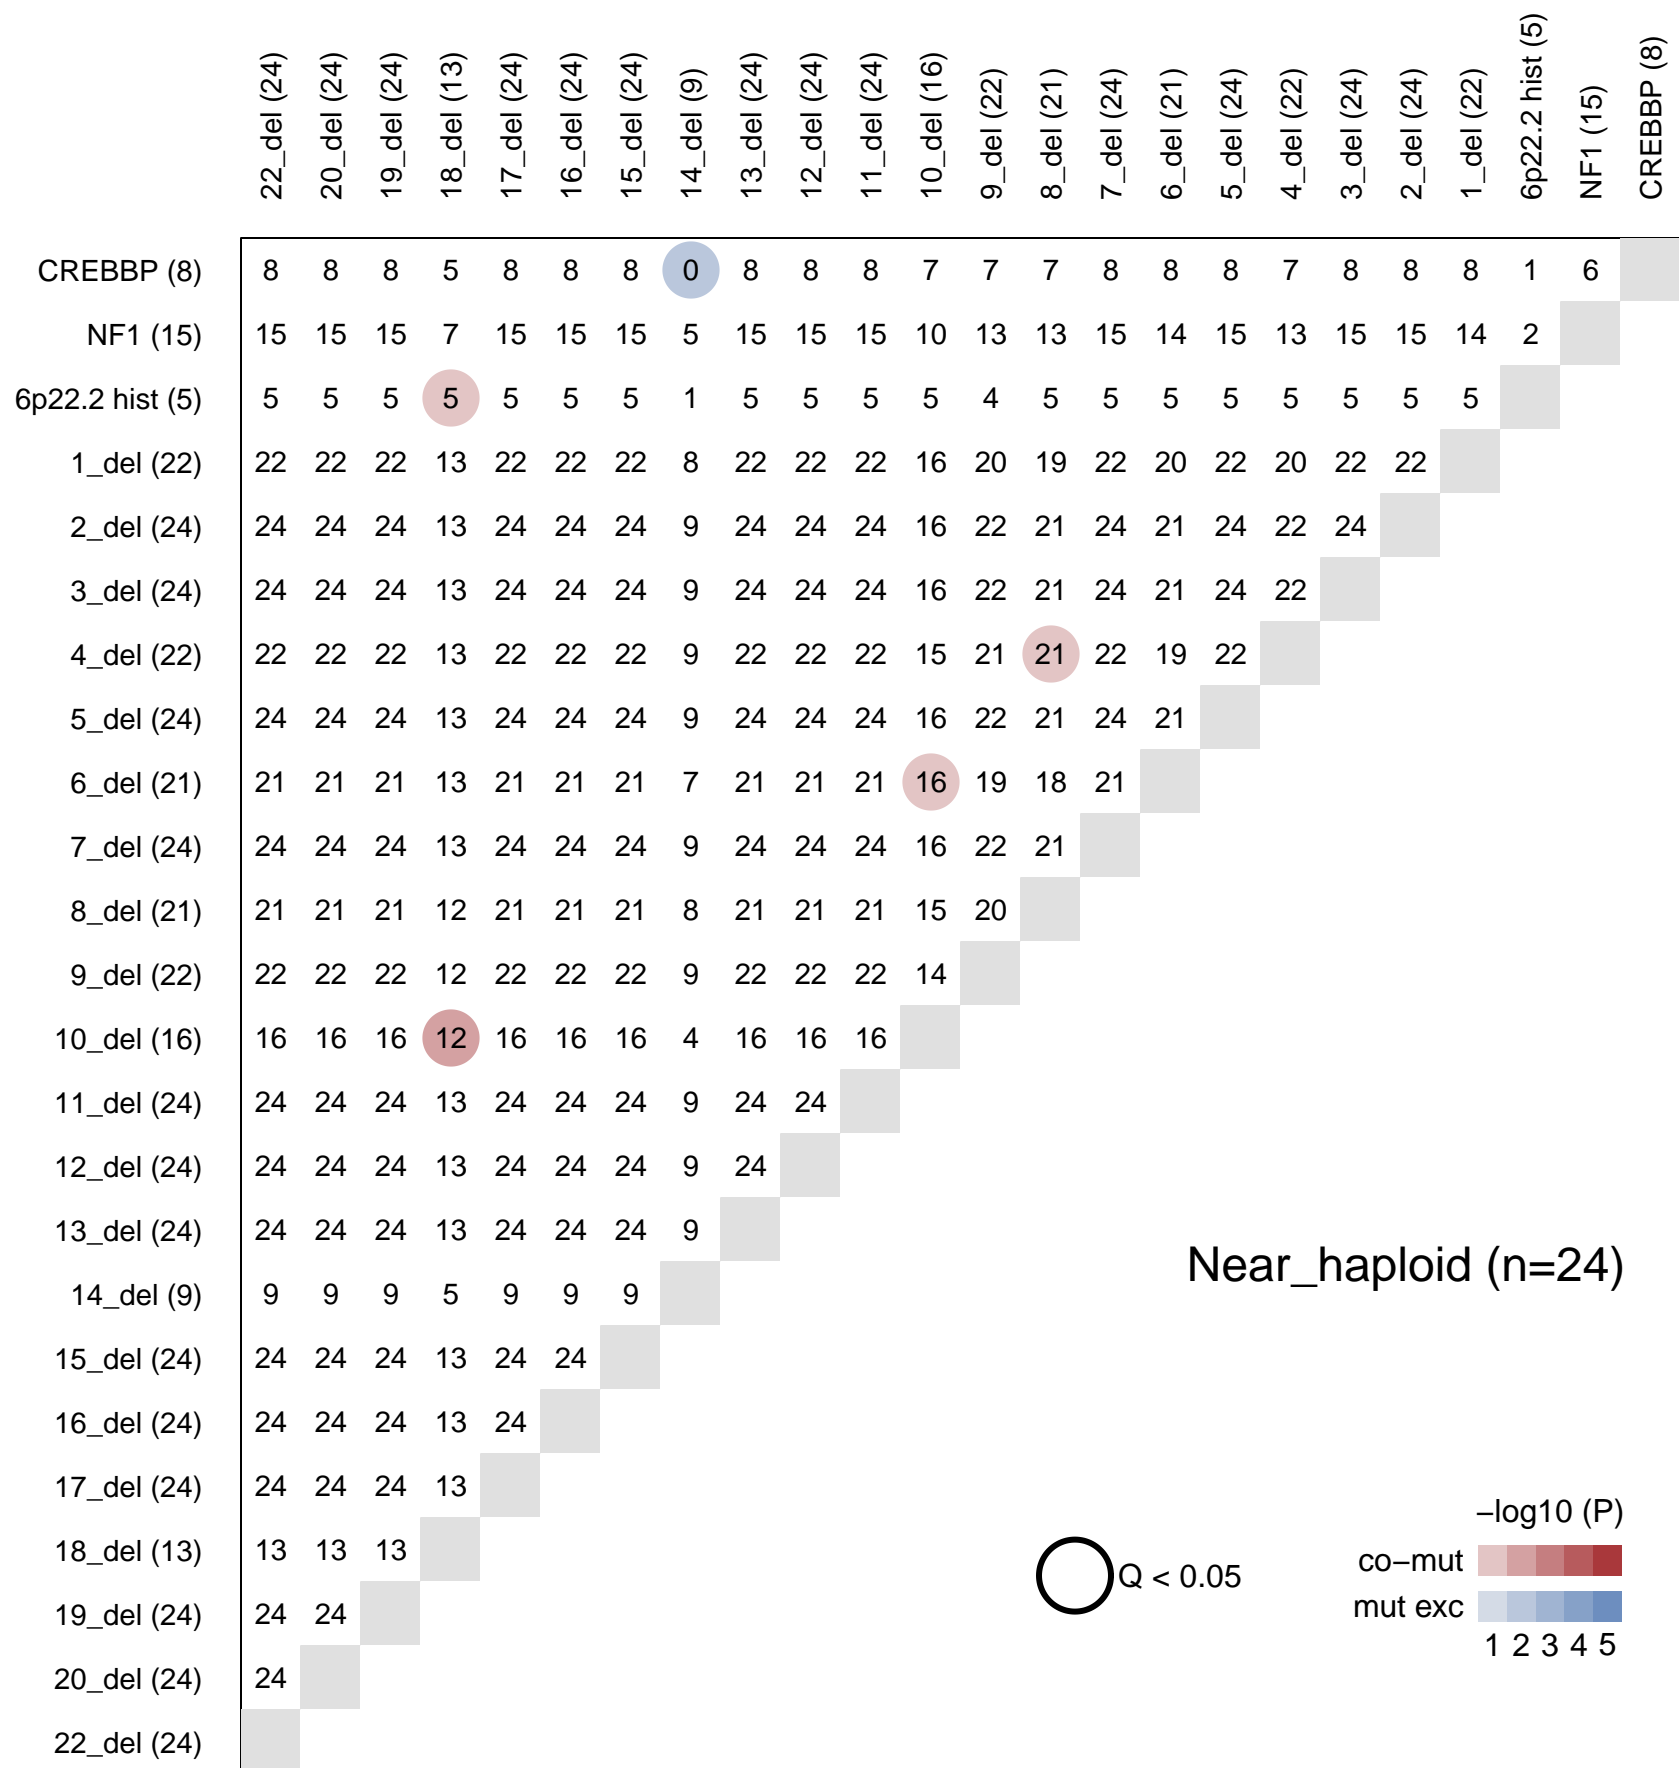

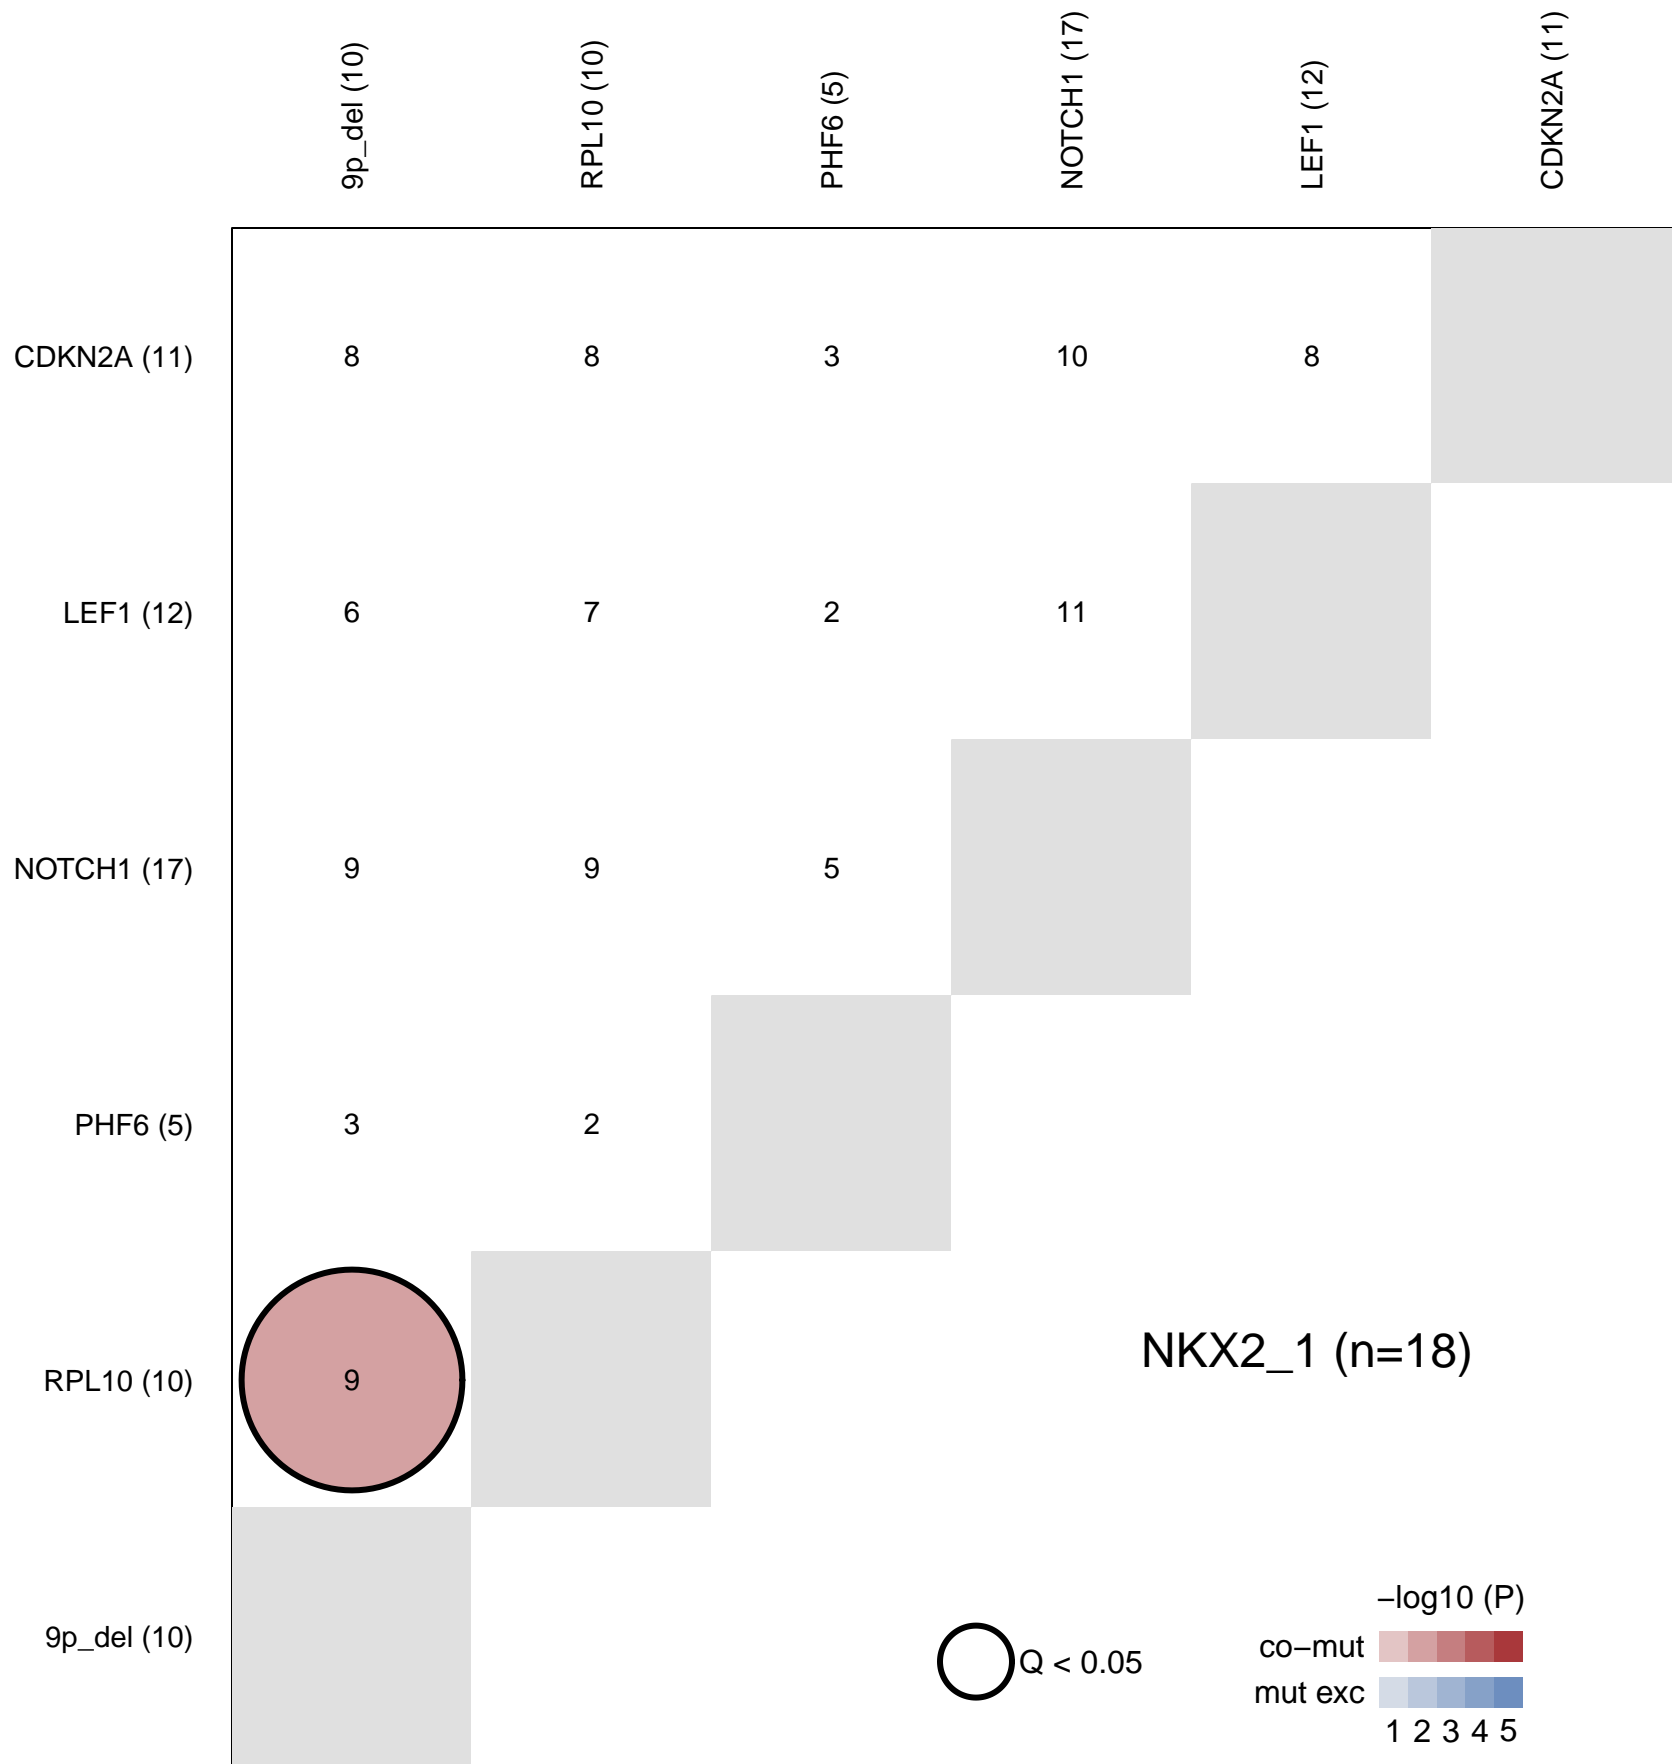

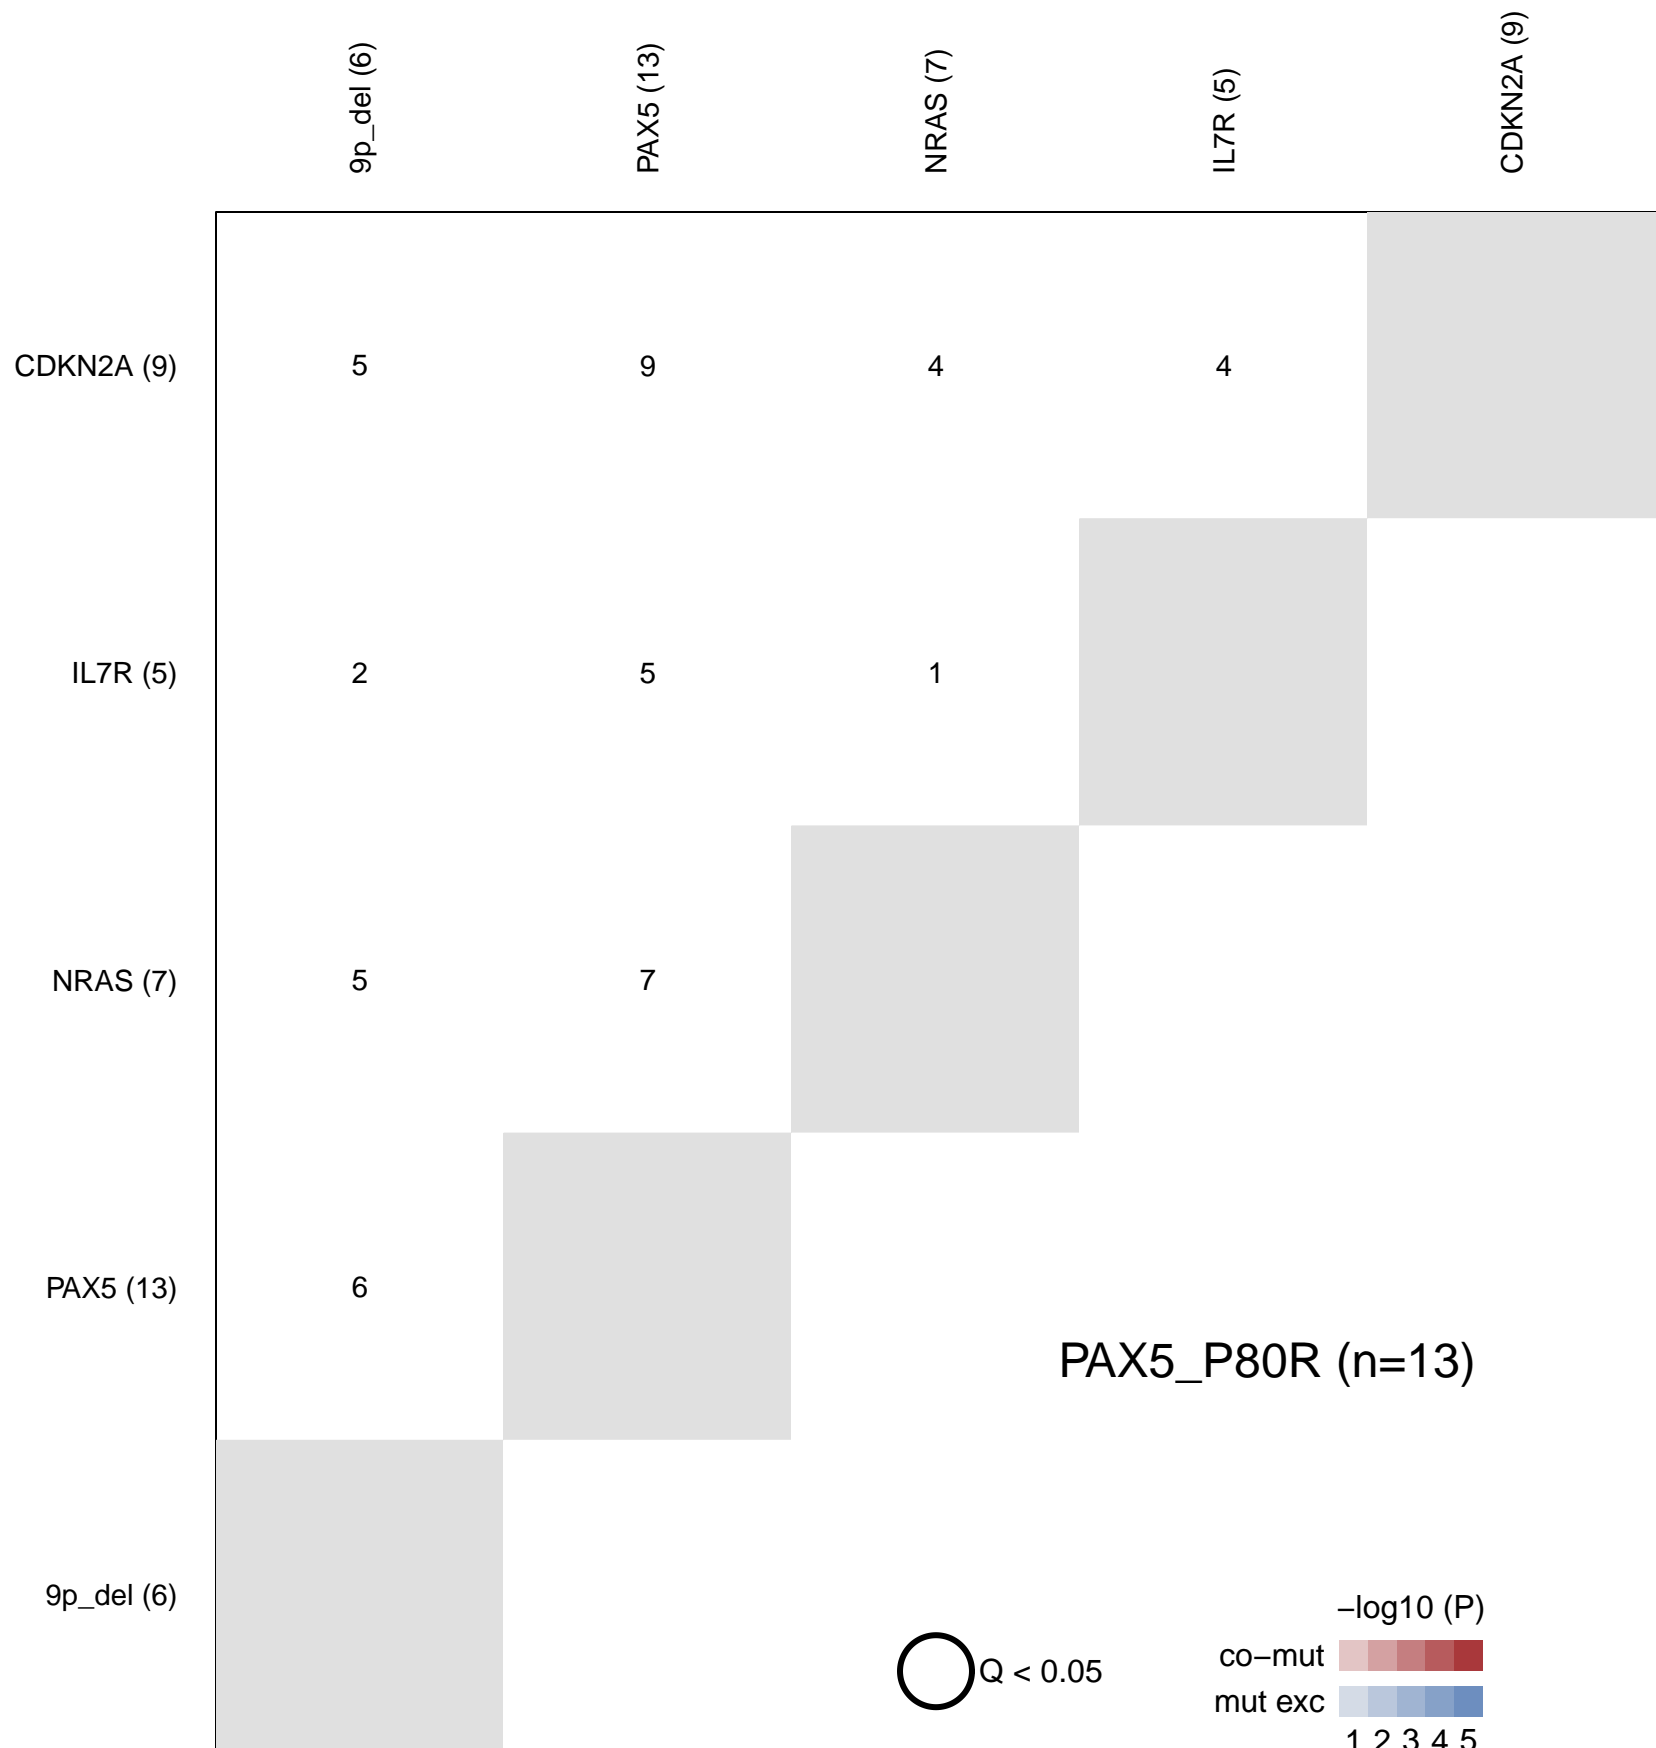

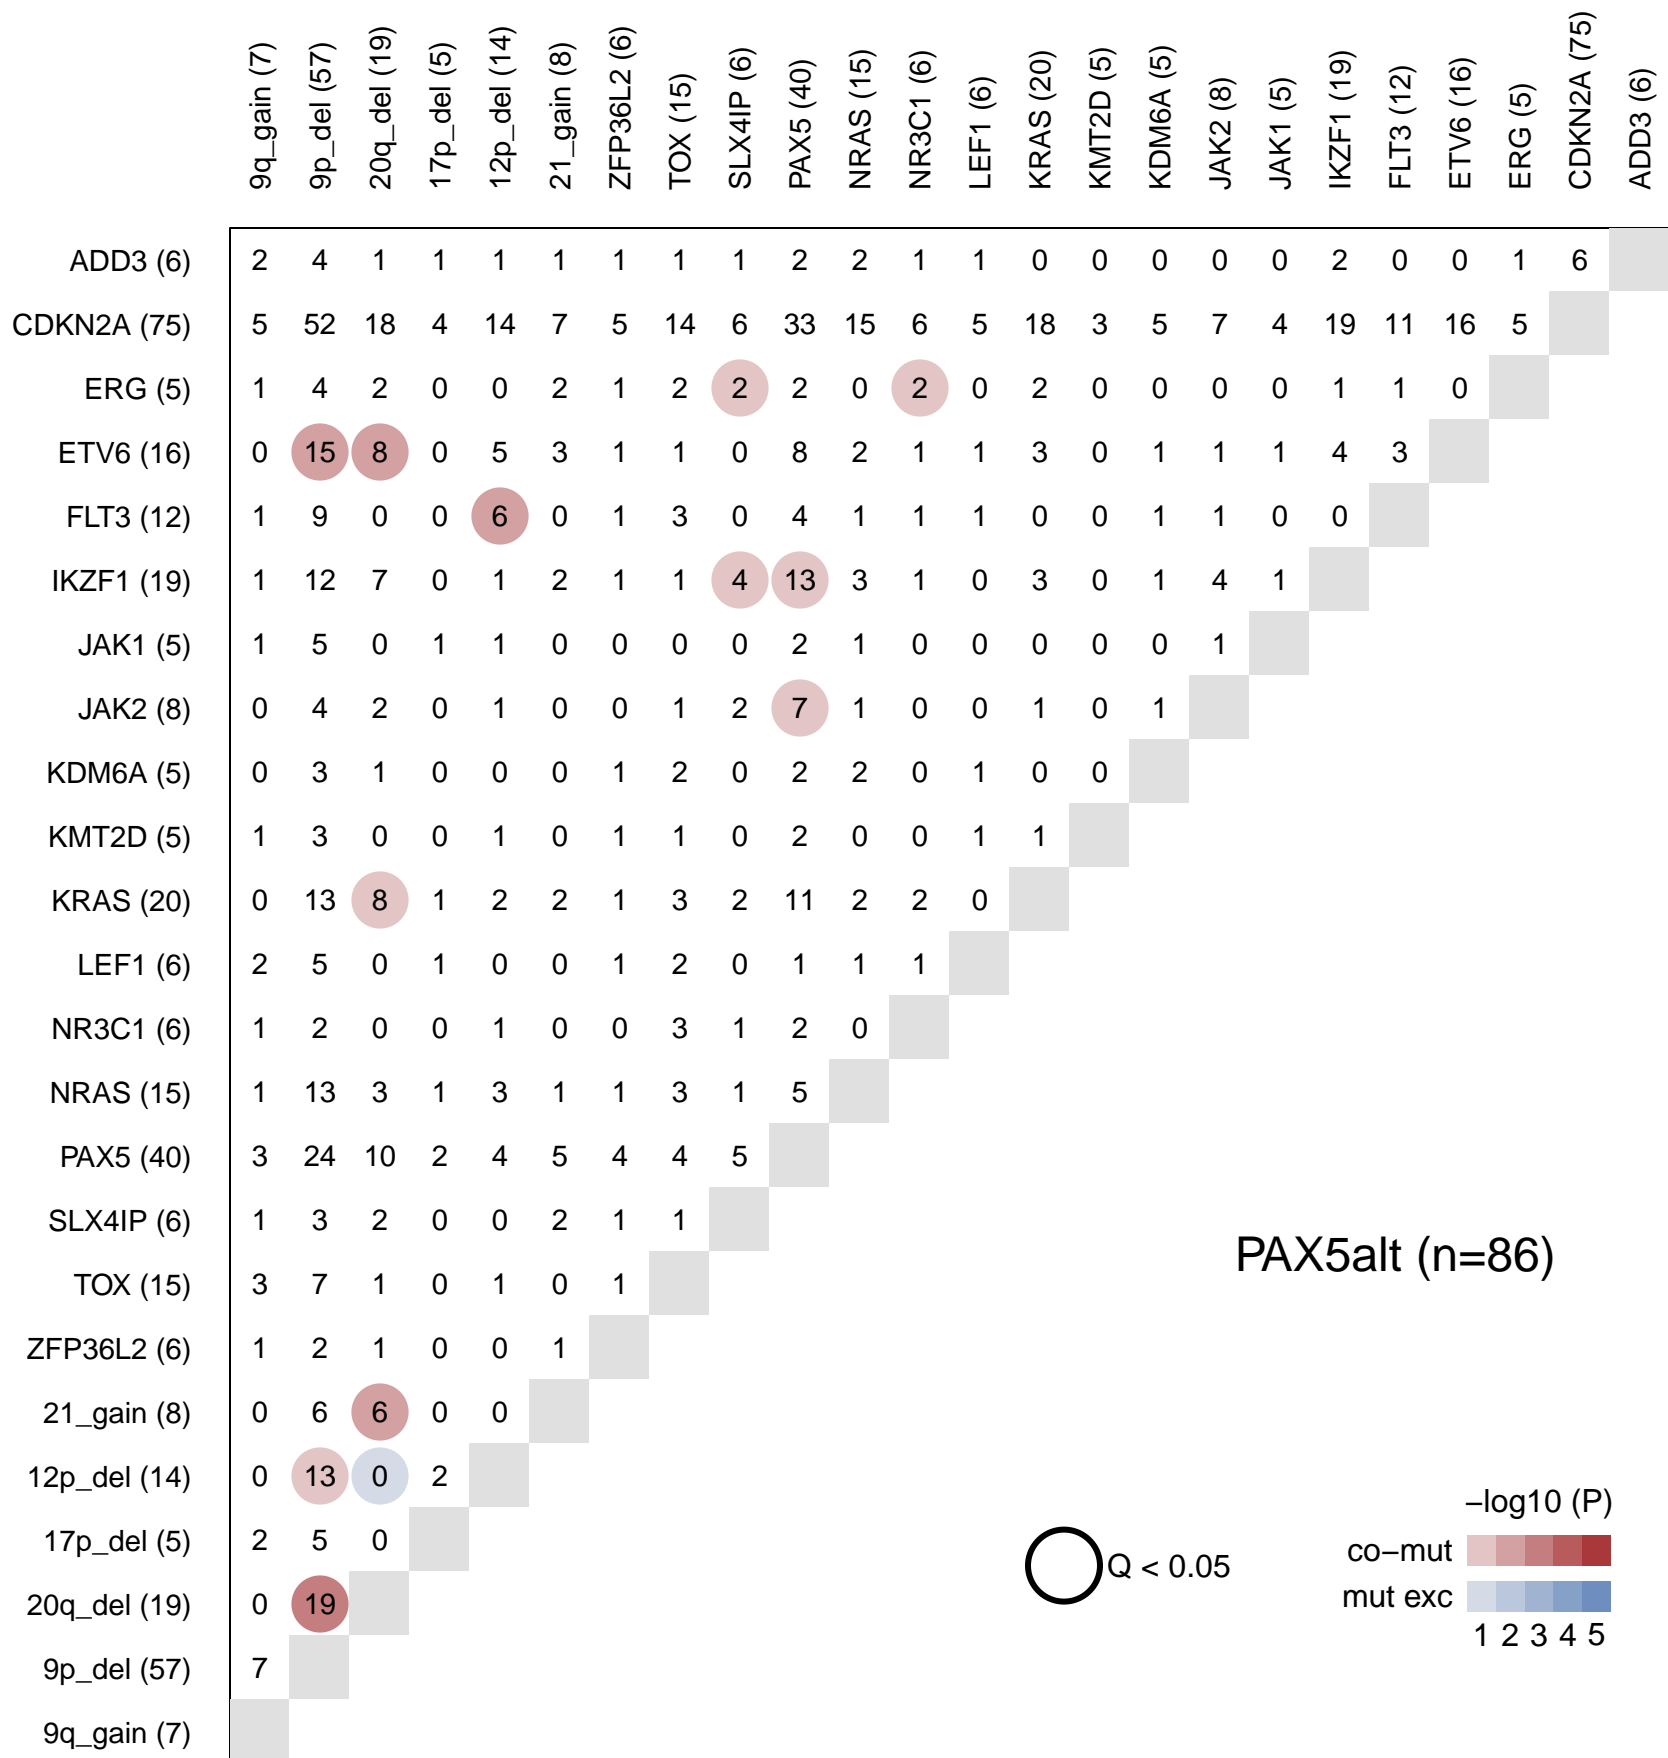

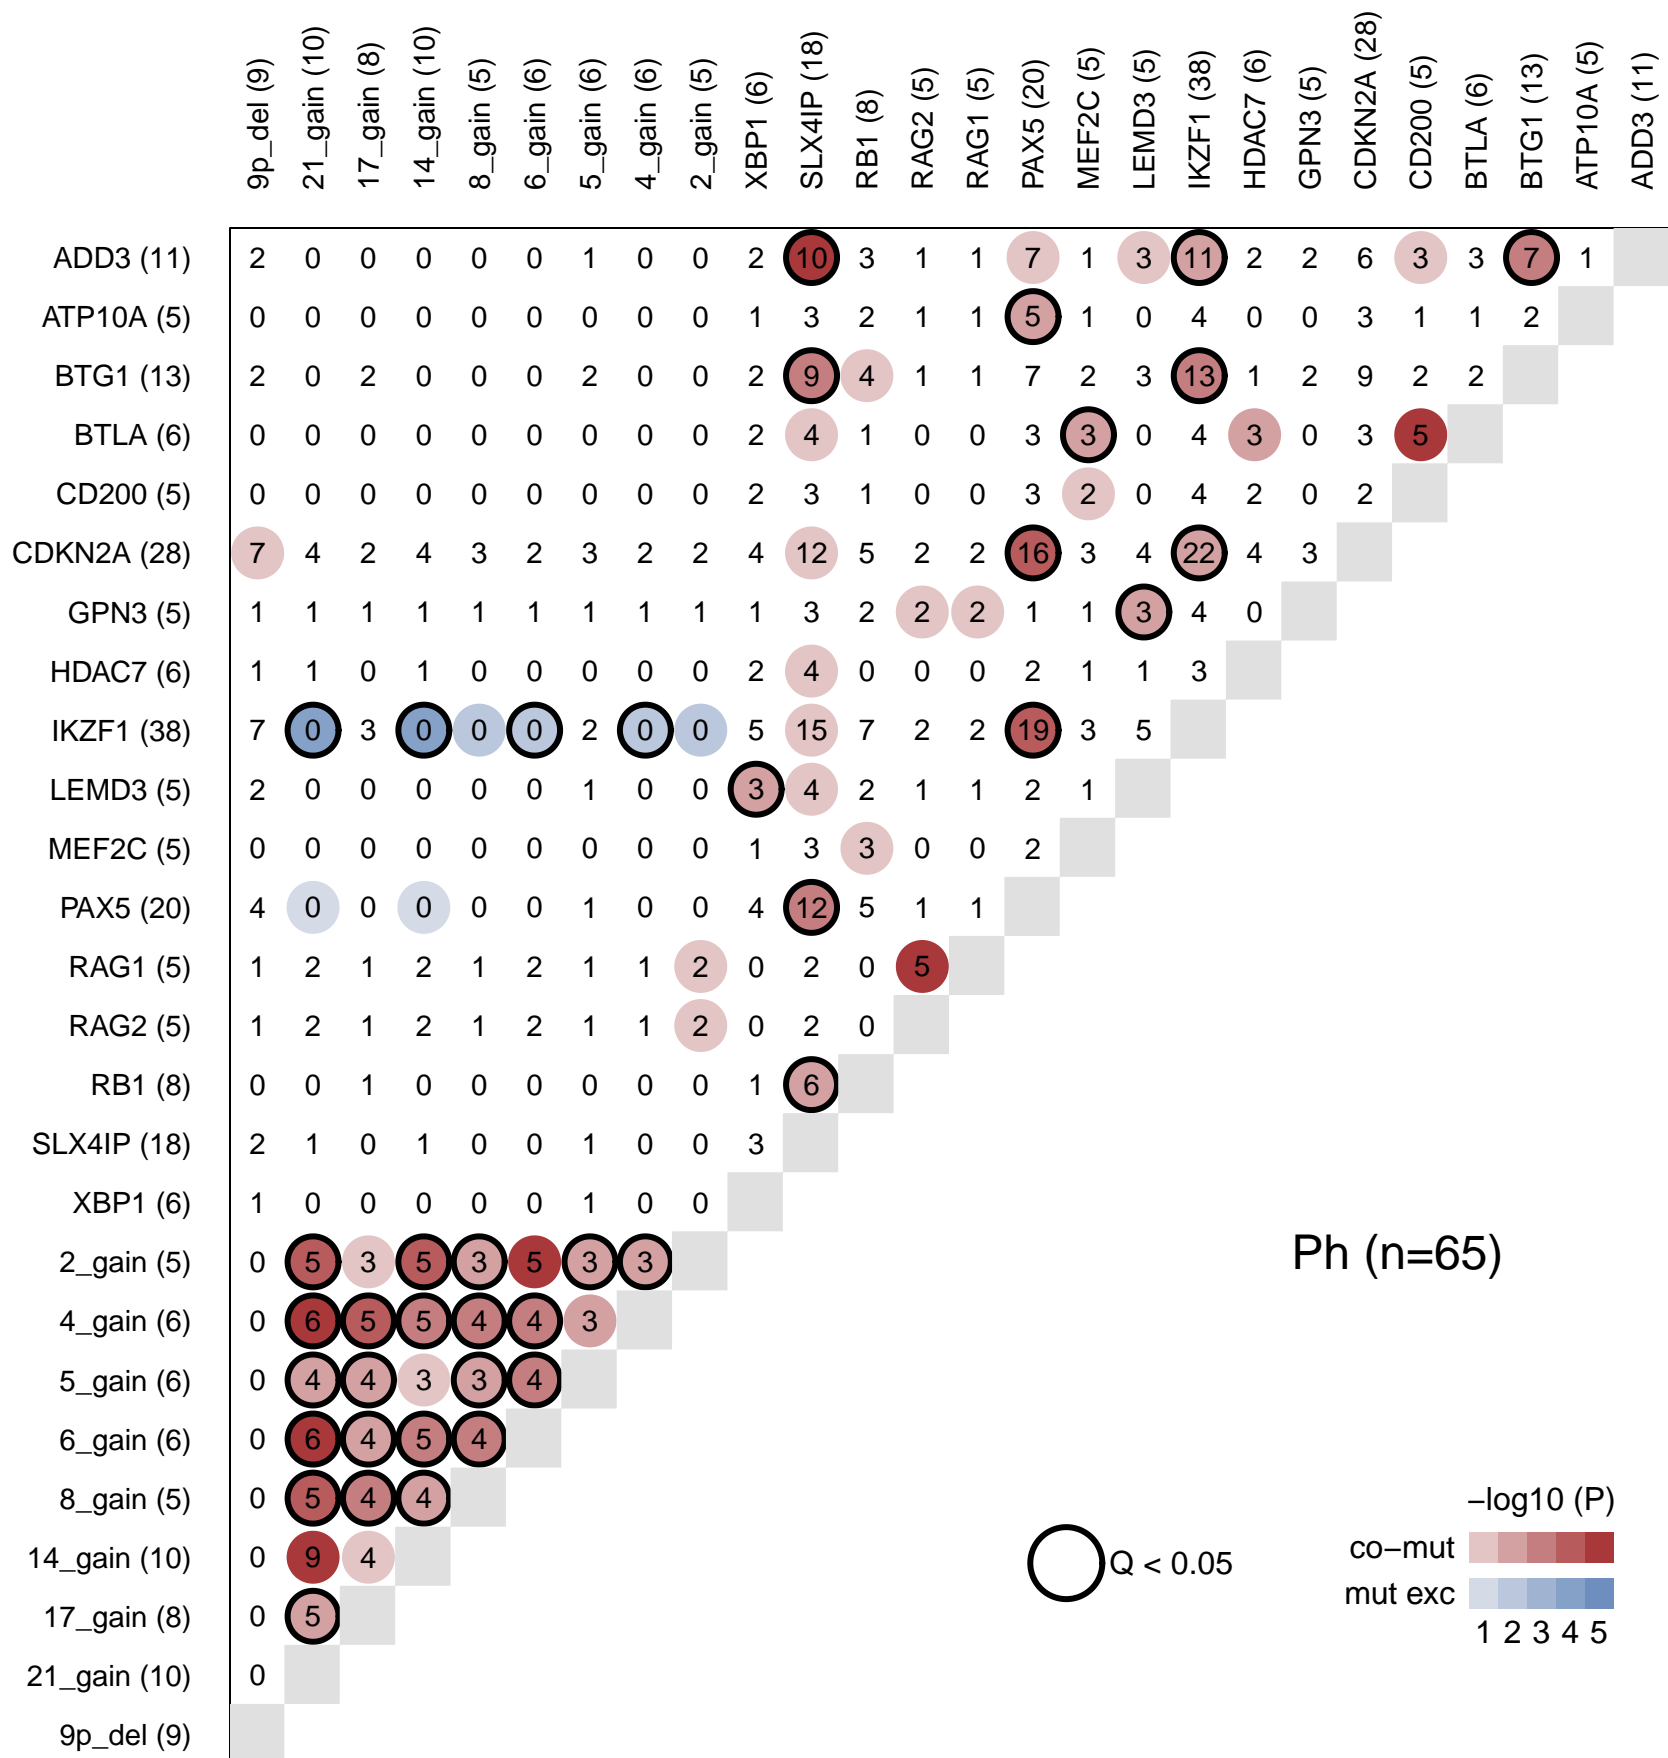

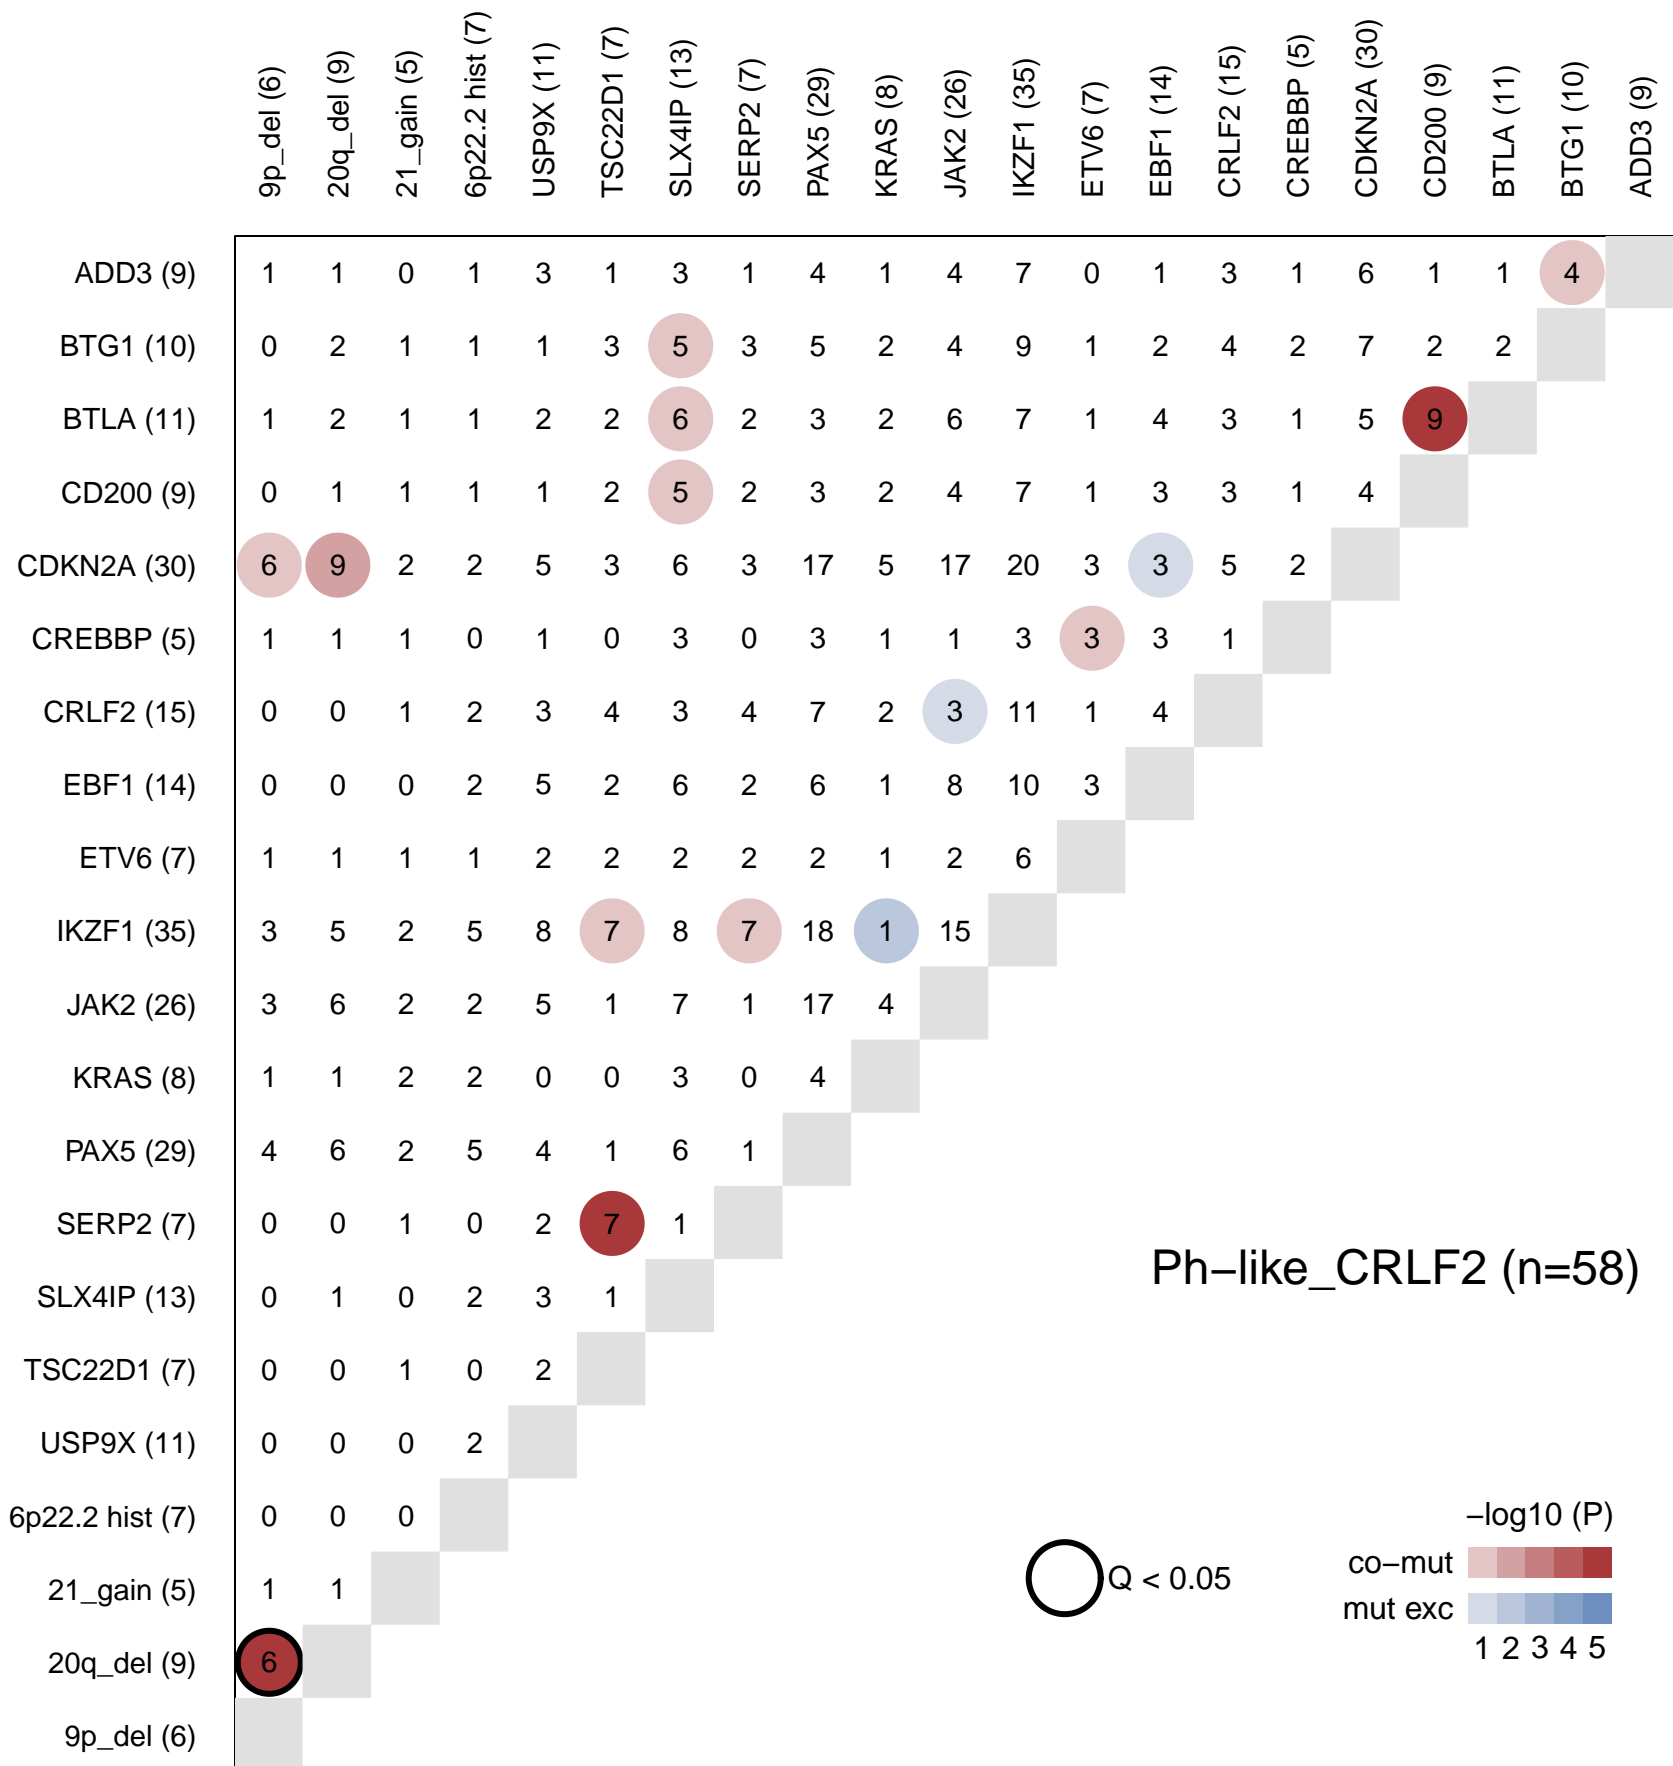

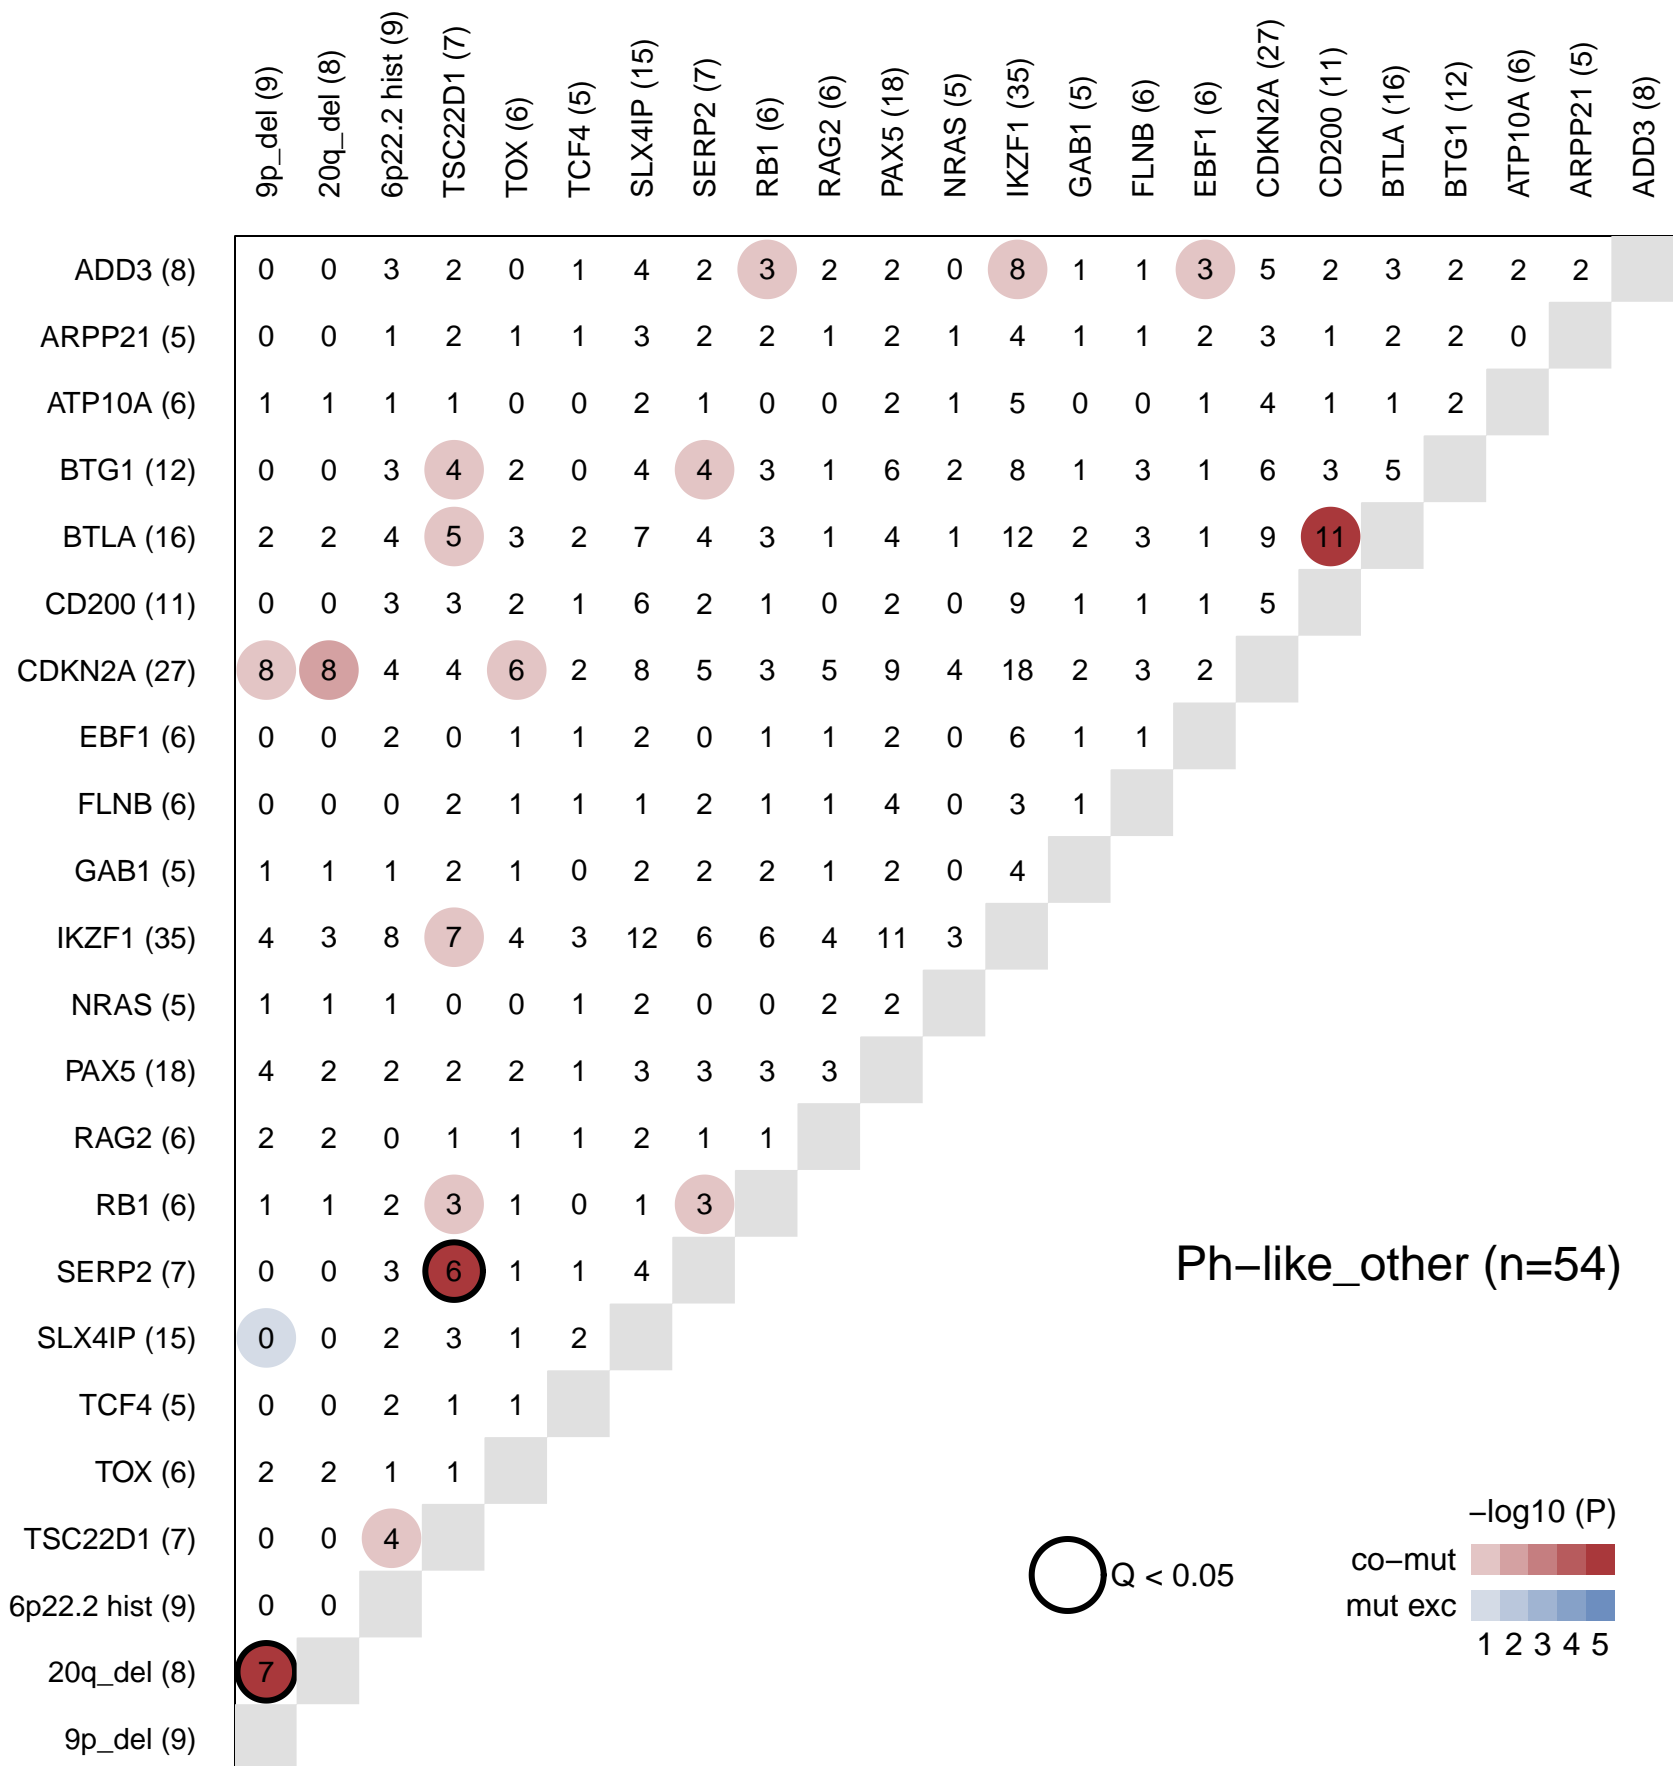

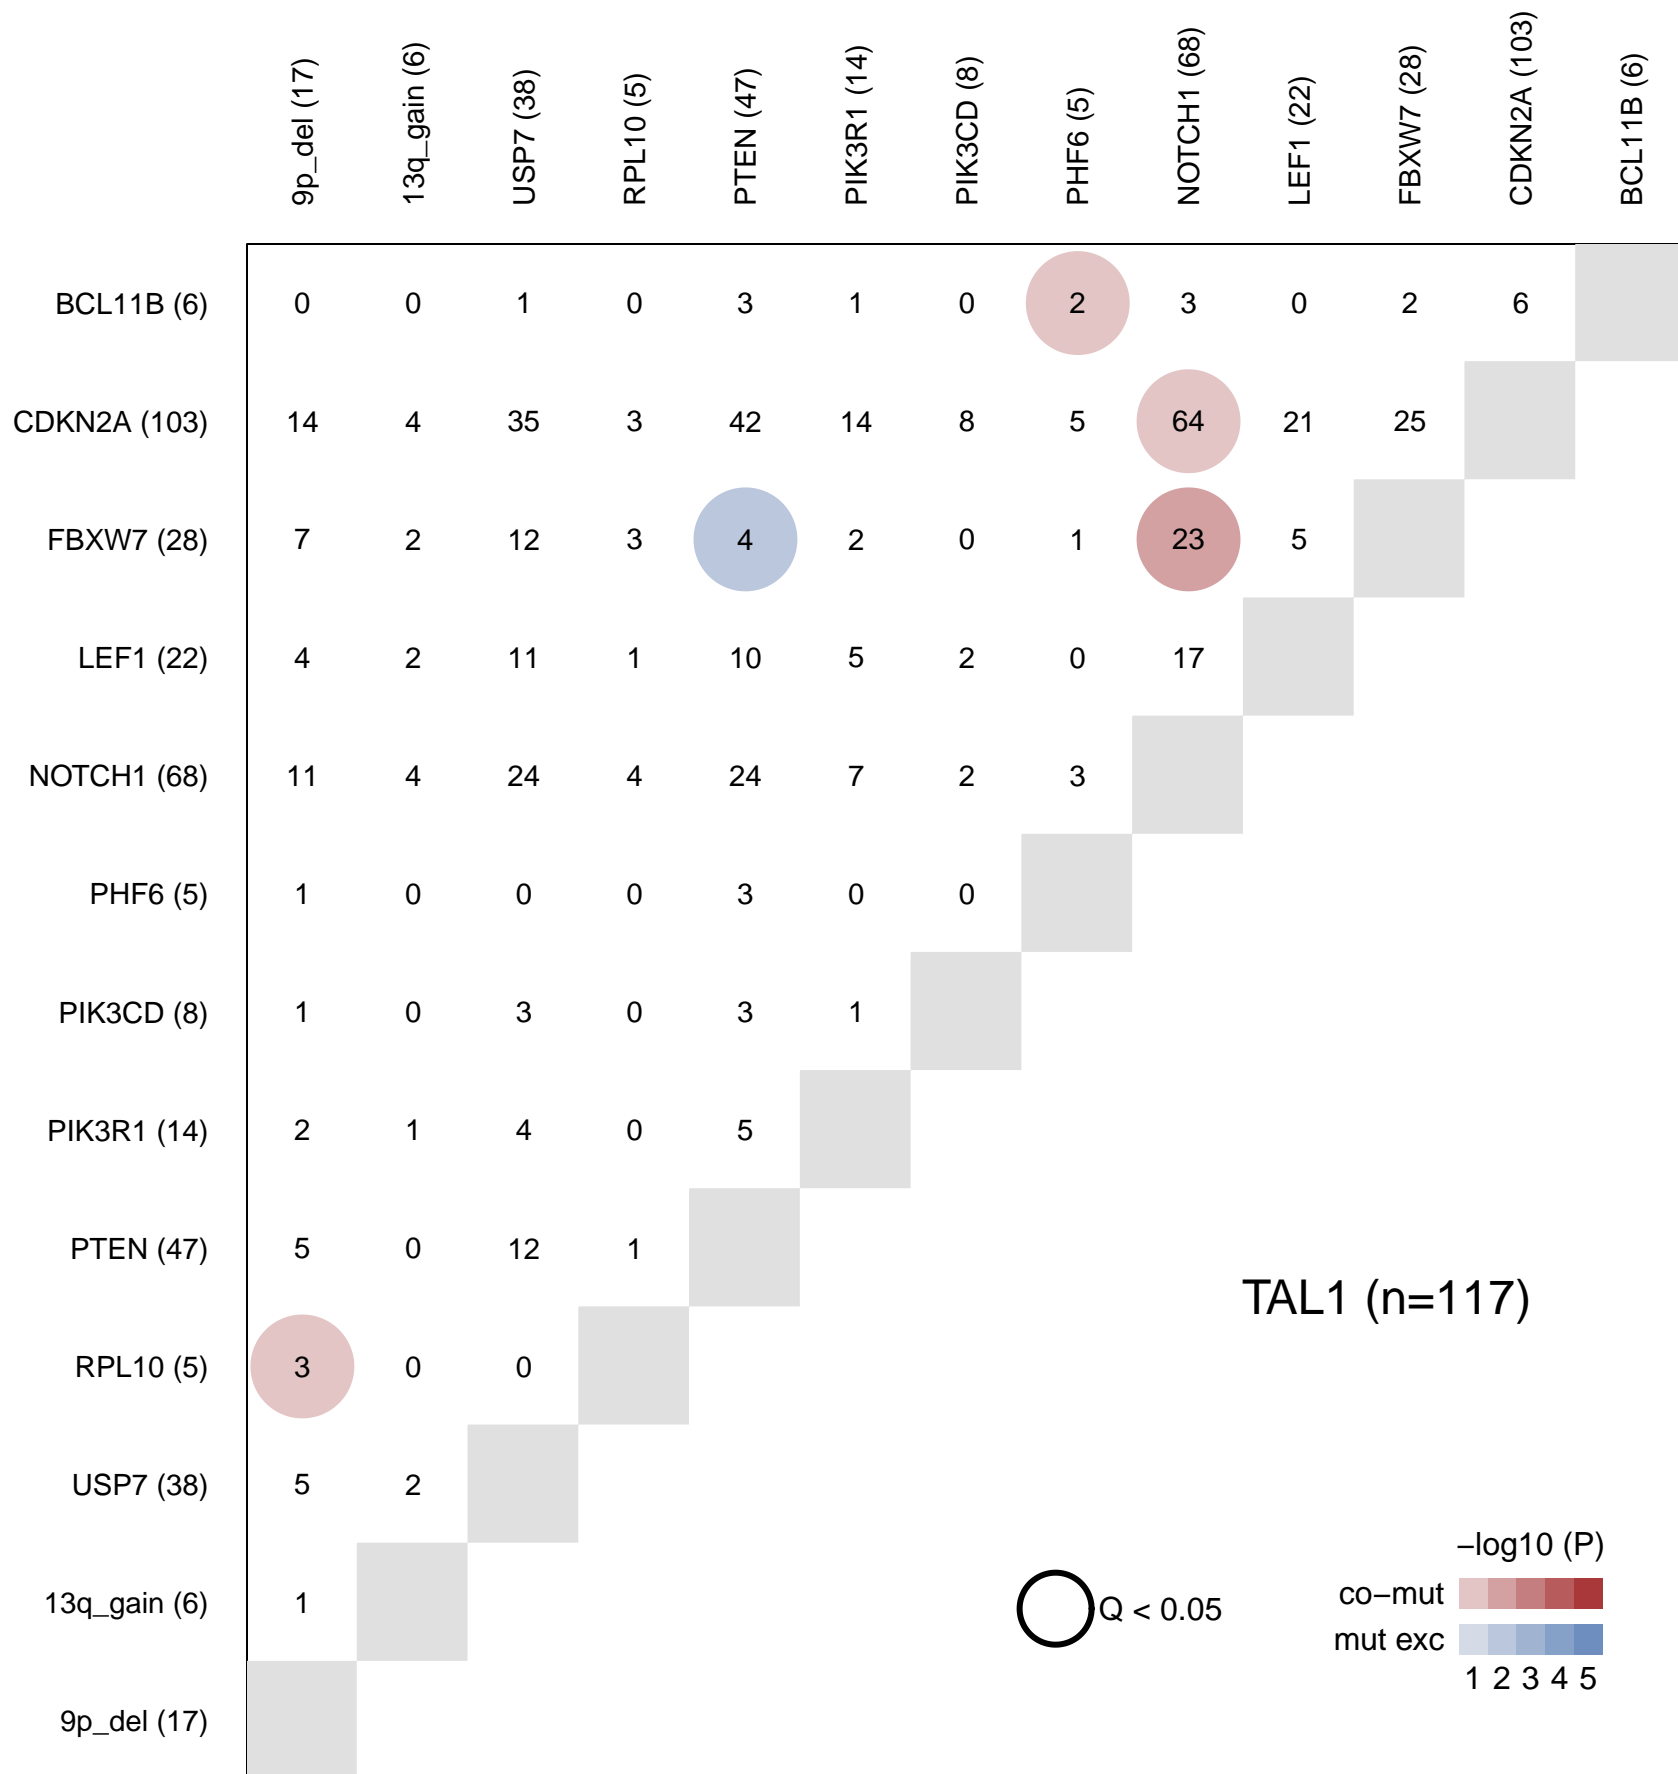



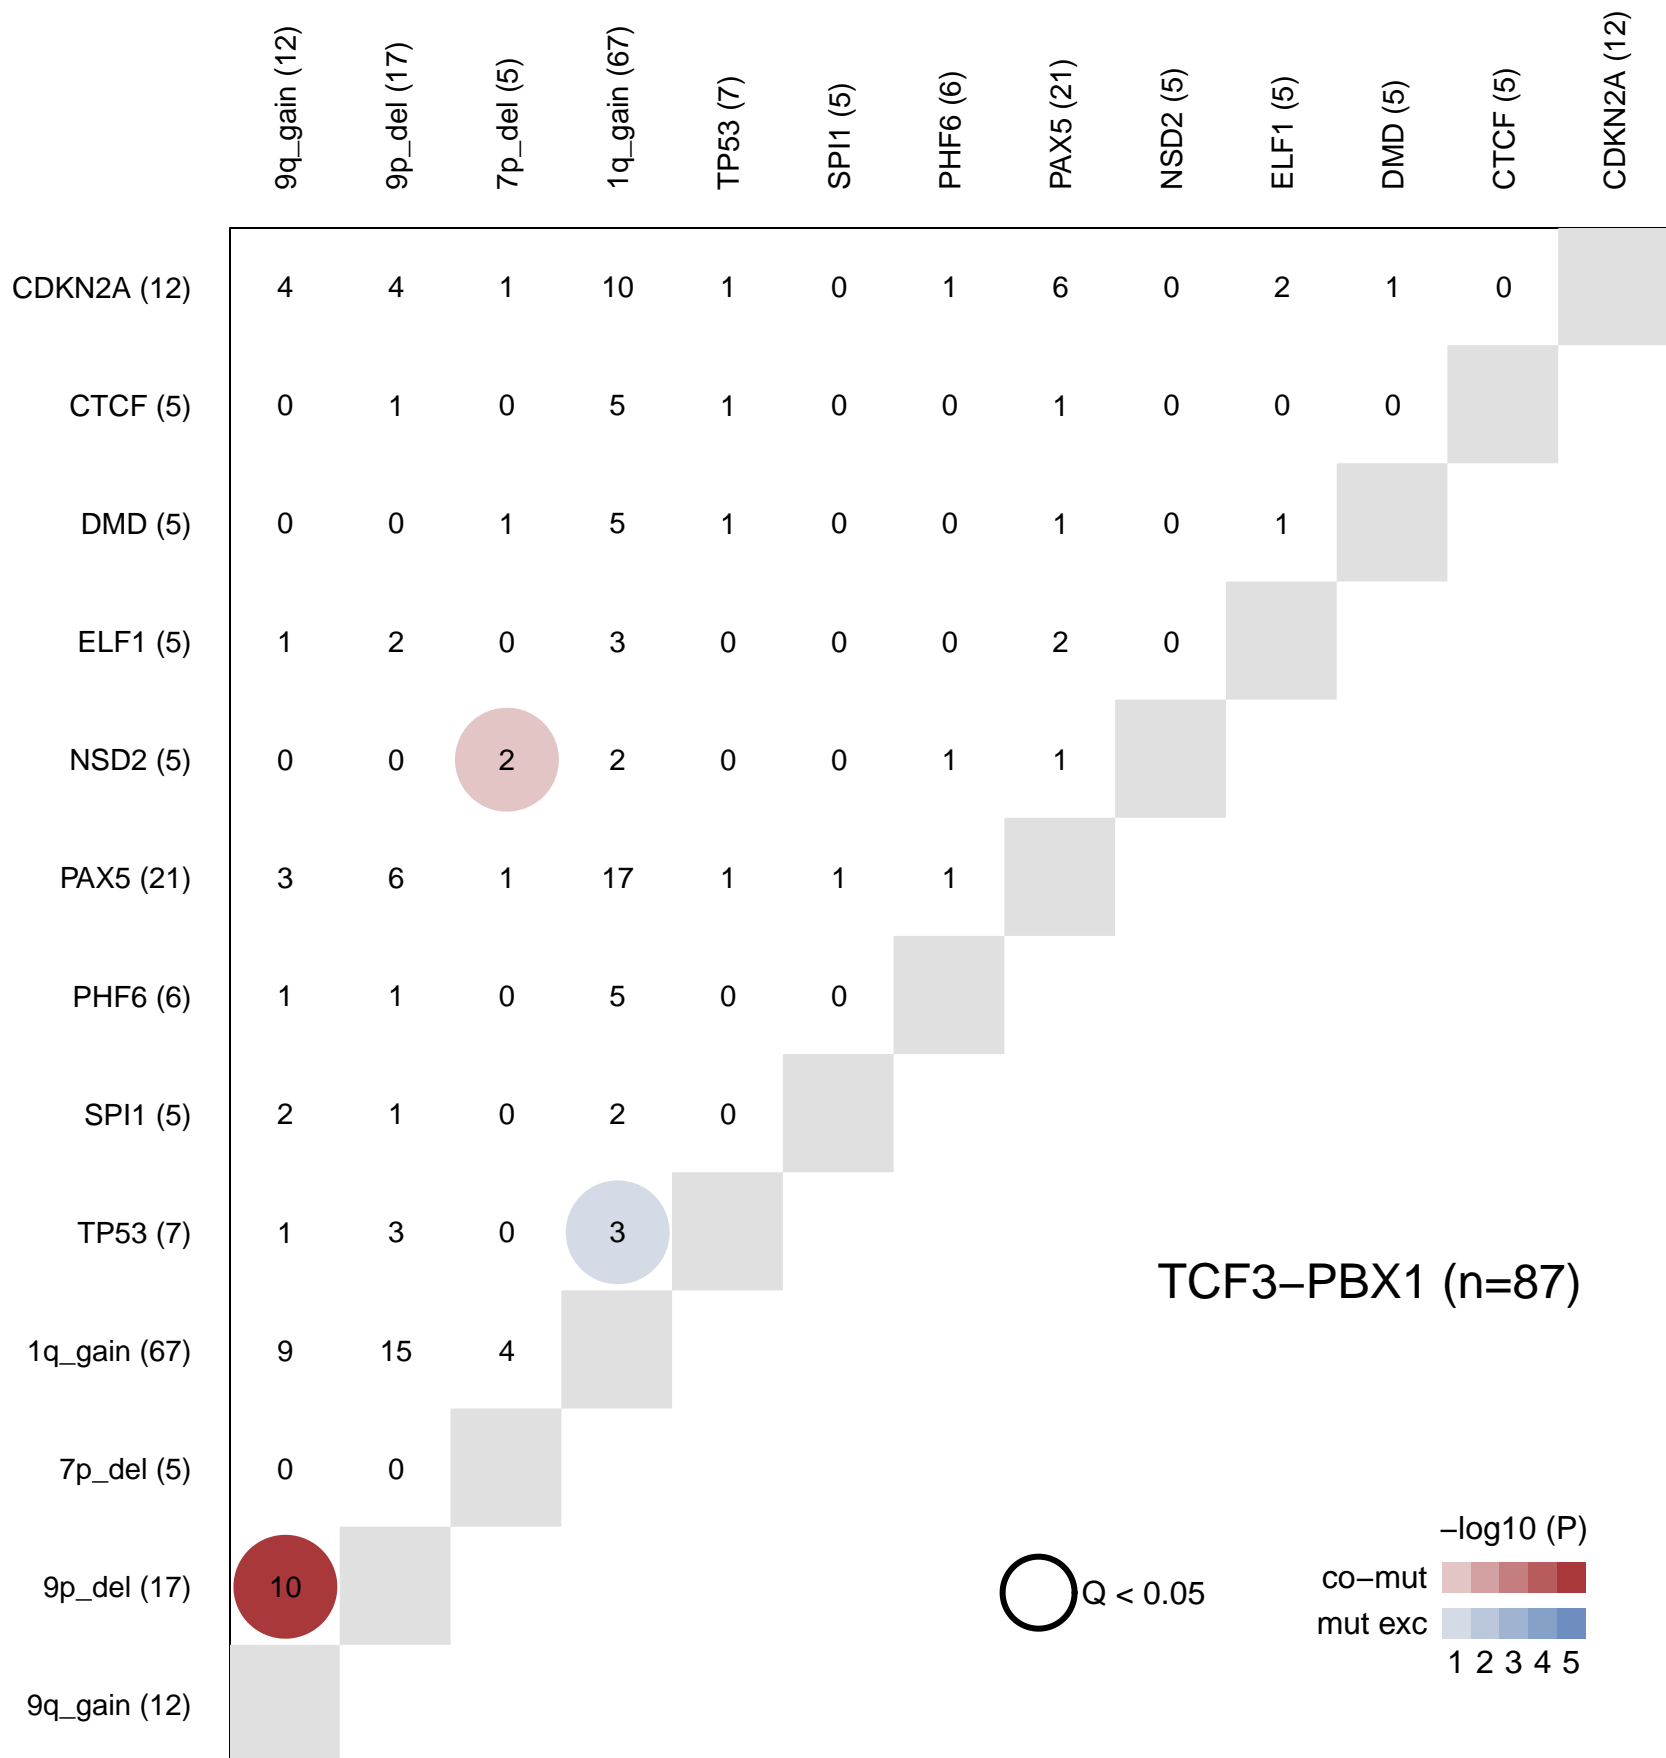

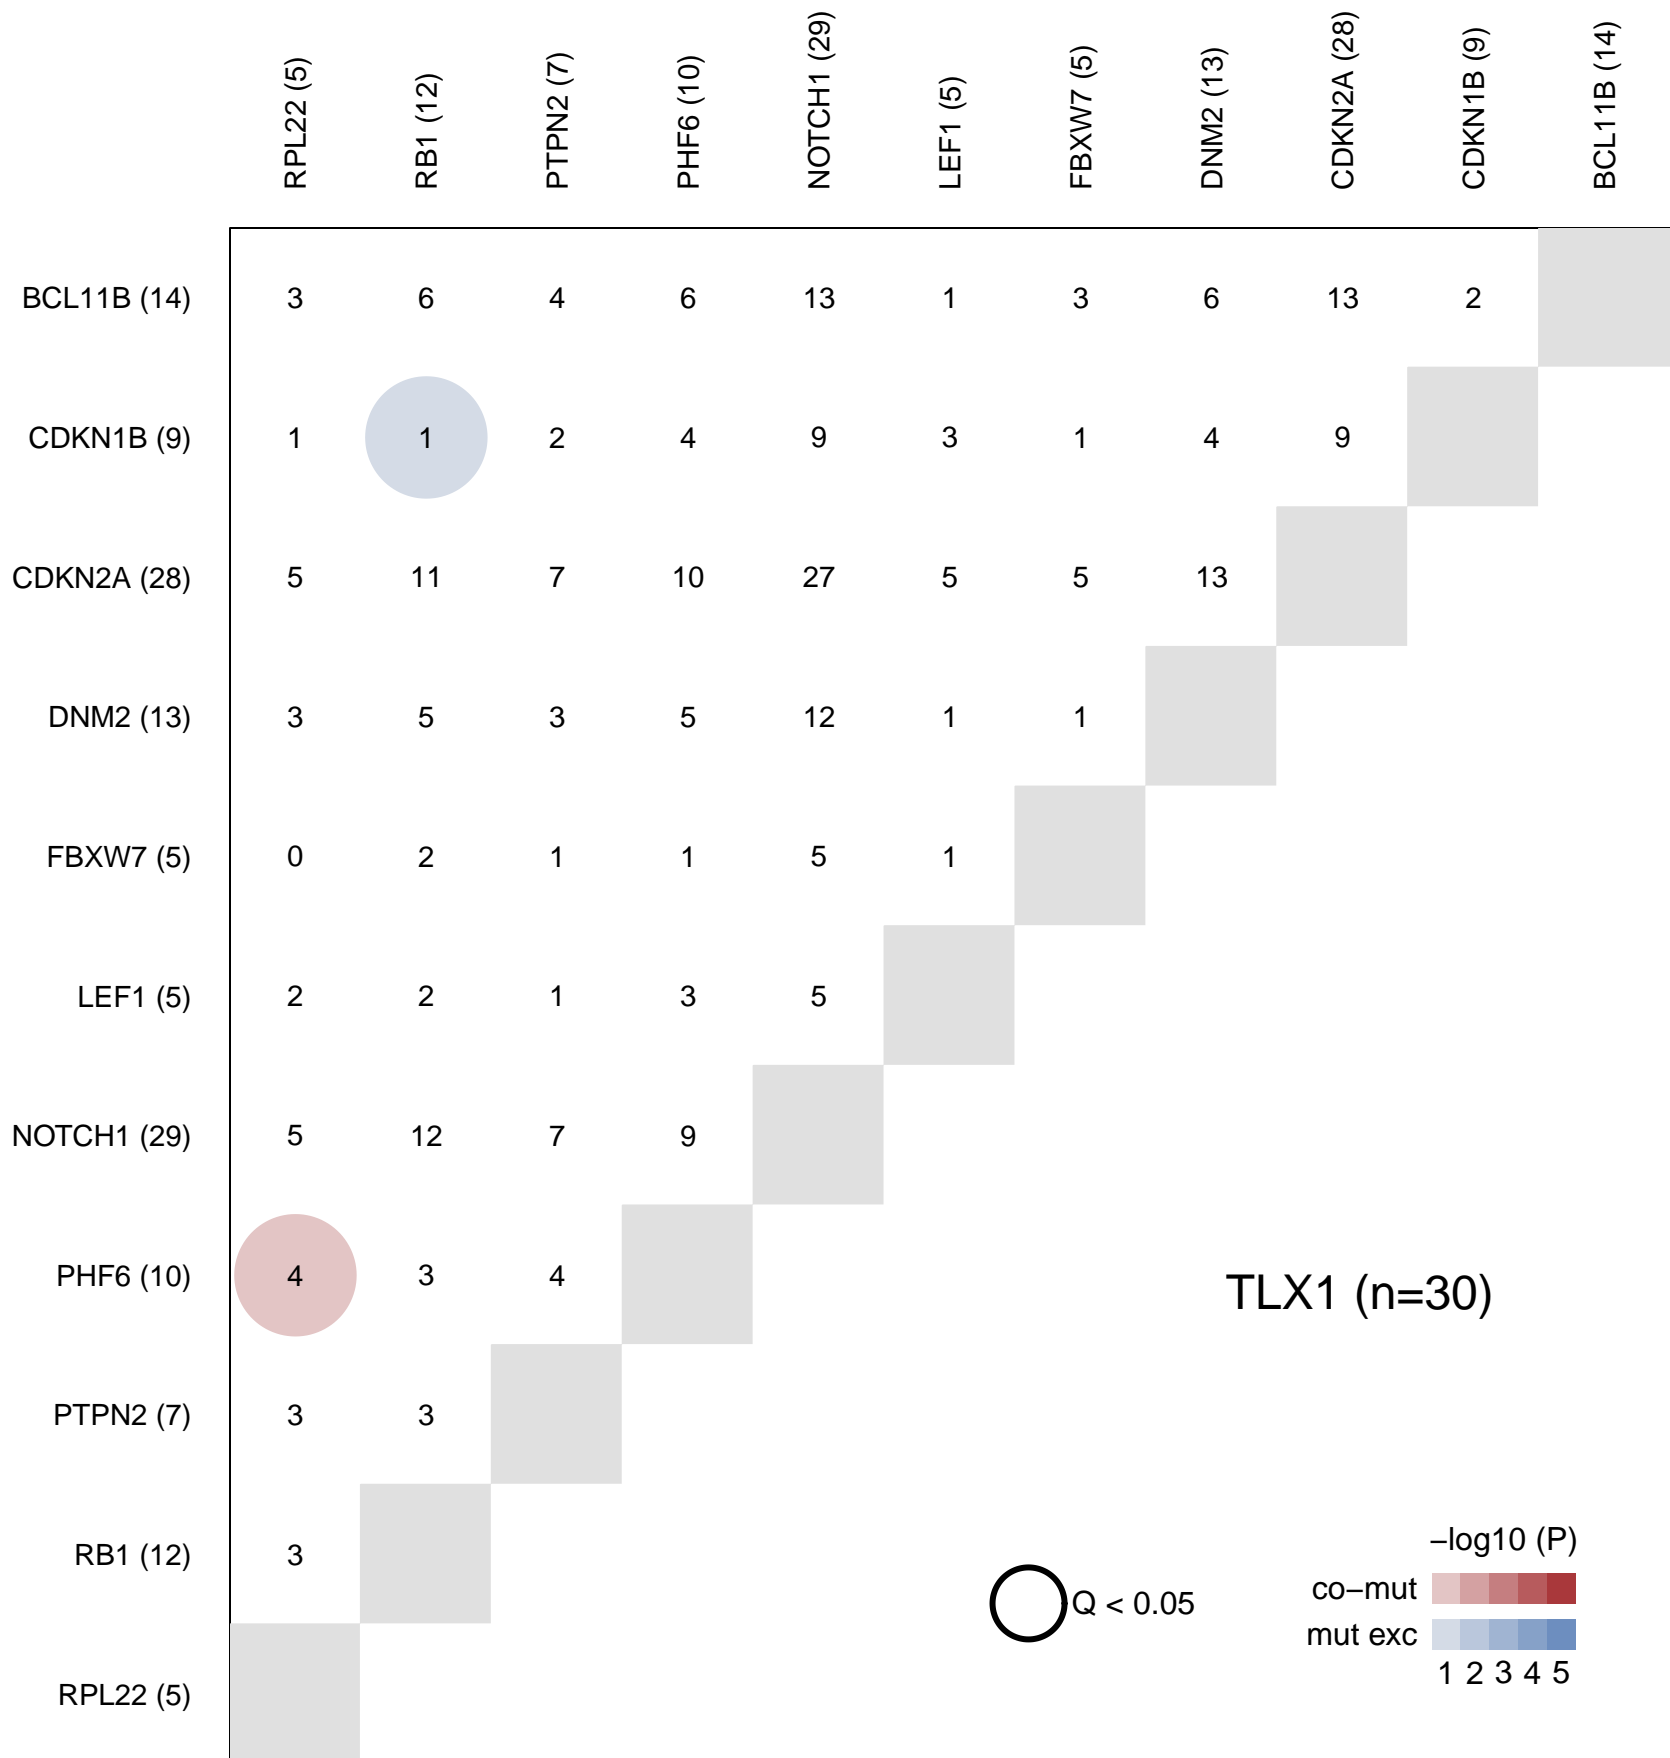

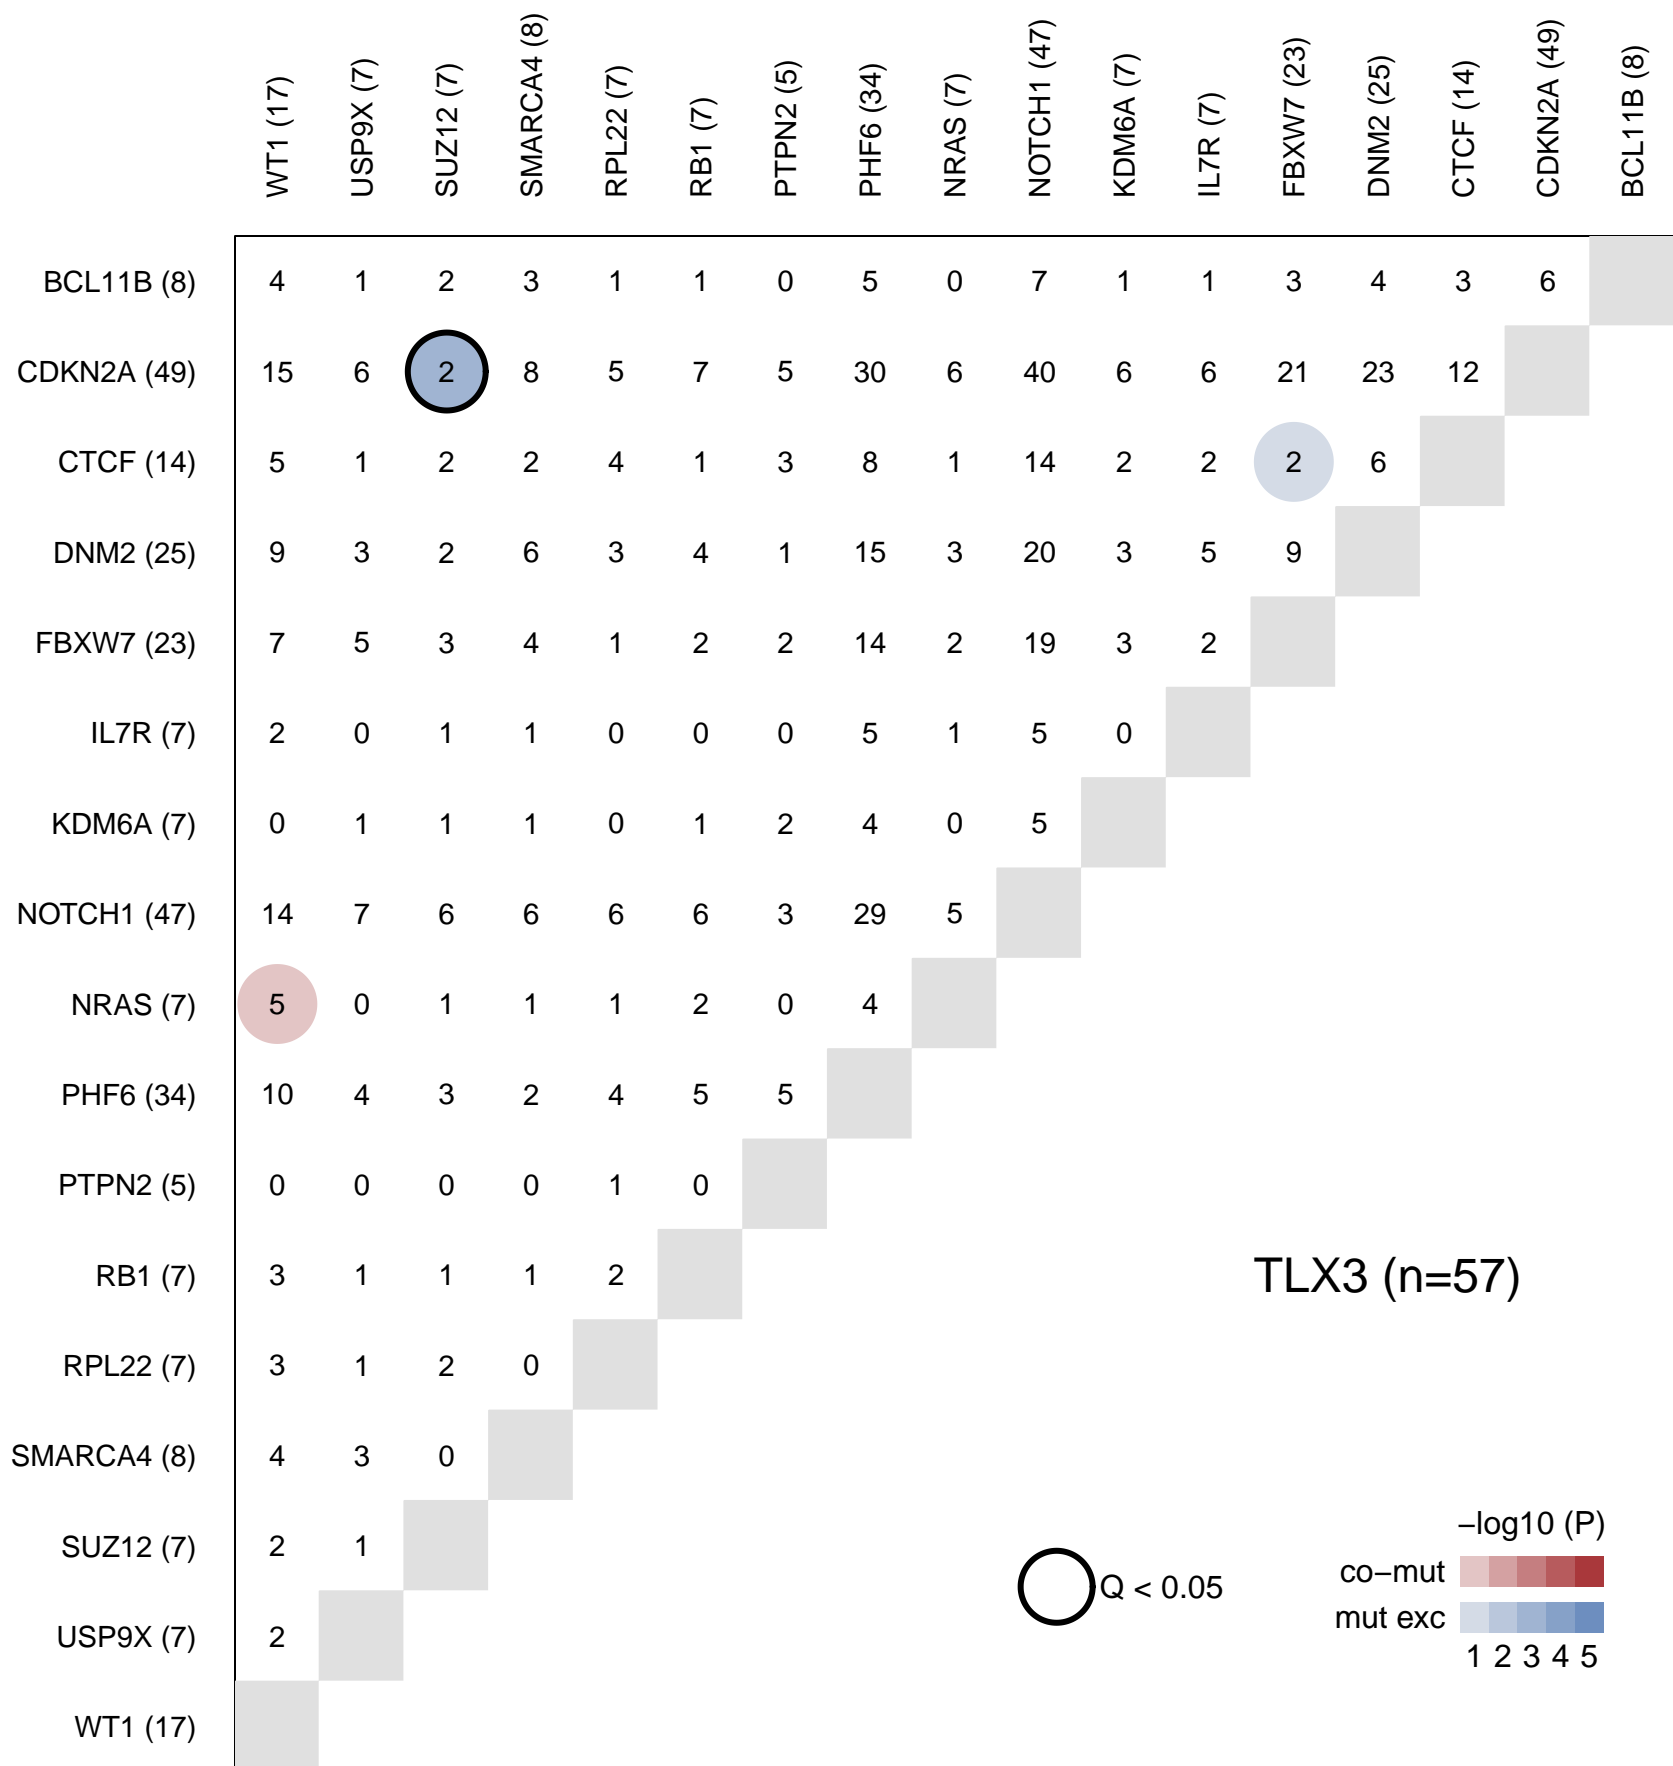

Supplement: NIHMS1848401-supplement-1848401_Sup_Dataset_6.pdf [file NIHMS1848401-supplement-1848401_Sup_Dataset_6.pdf]
